# Supplementary material for: Epigenetic Regulation of MAP3K8 in EBV-Associated Gastric Carcinoma
Source: MDPI journal article supplement (doi:10.3390/ijms24031964), 2023-01-19
Supplement: s1 [file s1]

**Supplementary Table S1:**

Sequence of primers used for making CRISPRi constructs.

| <b>Primer</b>                  | <b>5' → 3'</b>            |
|--------------------------------|---------------------------|
| CRISPRi MAP3K8 SE Region 1 - F | CACCGTTAGTAACAGAAACCCCGCA |
| CRISPRi MAP3K8 SE Region 1 - R | AAACTGCGGGGTTTCTGTTACTAAC |
| CRISPRi MAP3K8 SE Region 2 - F | CACCGTGTCACGACAGTCCTGAGGT |
| CRISPRi MAP3K8 SE Region 2 - R | AAACACCTCAGGACTGTCGTGACAC |
| CRISPRi MAP3K8 SE Region 3 - F | CACCGGCTGGTGAGCTACCTCCCAA |
| CRISPRi MAP3K8 SE Region 3 - R | AAACTTGGGAGGTAGCTCACCAGCC |
| CRISPRi MAP3K8 SE Region 4 - F | CACCGTCAAACAGGTTAGGCCACCT |
| CRISPRi MAP3K8 SE Region 4 - R | AAACAGGTGGCCTAACCTGTTTGAC |

**Supplementary Table S2:**

Sequence of primers used in qRT-PCR experiments.

| <b>Primer</b>         | <b>5' → 3'</b>          |
|-----------------------|-------------------------|
| MAP3K8 Forward primer | ATGGAGTACATGAGCACTGGA   |
| MAP3K8 Reverse primer | GCTGGCTCTTCACTTGCATAAAG |
| EpCAM Forward primer  | AATCGTCAATGCCAGTGTACTT  |
| EpCAM Reverse primer  | CTCCTCCTGTTTCGACAGTCAGC |
| SOX9 Forward primer   | AGCCGACTCCCACATTTCCTCC  |
| SOX9 Reverse primer   | GAGATTGCCCAGAGTGCTCGCCC |
| TBX3 Forward primer   | GCAGCTTTCAACTGCTTCG     |
| TBX3 Reverse primer   | TGAGGTTTCGATGTCCCTACA   |

|                          |                           |
|--------------------------|---------------------------|
| CXCL3 Forward primer     | CGCCCAAACCGAAGTCAT        |
| CXCL3 Reverse primer     | GTGCTCCCCTTGTTCA GTATCT   |
| ZFP36L1 Forward primer   | ATGACCACCACCCTCGTGT       |
| ZFP36L1 Reverse primer   | TTTCTGTCCAGCAGGCAACC      |
| DPYSL2 Forward primer    | CCTTCCTCGTGTACATGGCTT     |
| DPYSL2 Reverse primer    | ATTTTCTGCGTGGACTTGGGCTA   |
| SPINT2 Forward primer    | AAGAATACTGCACCGCCAAC      |
| SPINT2 Reverse primer    | TTCTTCACCAGCTGCTCCTT      |
| FZD5 Forward primer      | ACACGCCCATCTGTCTGCC       |
| FZD5 Reverse primer      | CCTCGCTGCGGTTGTAATCC      |
| SDC1 Forward primer      | AAGATATCACCTTGTCACAGCA    |
| SDC1 Reverse primer      | GTTCTGGAGACGTGGGAATAG     |
| SPRY1 Forward primer     | CCCTGCCCTGGATAAGGAAC      |
| SPRY1 Reverse primer     | GGCCGAAATGCCTAATGCAA      |
| TNFRSF11A Forward primer | TTGTGGCACTGGATCAATGAGG    |
| TNFRSF11A Reverse primer | CCGTGAAGCACTGGCTTAACTG    |
| ITGB8 Forward primer     | TGTGTGCTGGGCATGGAGAGTGT   |
| ITGB8 Reverse primer     | CAGTGCTGGGCTGCTGCTGAA     |
| CLDN2 Forward primer     | AACTACTACGATGCCTACC       |
| CLDN2 Reverse primer     | GAACTCACTCTTGACTTTGG      |
| AHR Forward primer       | CTCCCTCCACAGTTGGCTTTGTTTG |
| AHR Reverse primer       | GATTCTGCGCAGTGAAGCATGTCAG |
| FAT1 Forward primer      | GTGTTTGTTCTCTGCCGTAAG     |
| FAT1 Reverse primer      | TAGGCTTCTGGATGGAGTCG      |

|                        |                                |
|------------------------|--------------------------------|
| SPRY4 Forward primer   | CTGACCAACGGCTCTTAGAC           |
| SPRY4 Reverse primer   | GATGCACACTCCTTGCATTTAC         |
| TBC1D16 Forward primer | AGATGCAGCTCAAAGACCAGG          |
| TBC1D16 Reverse primer | GAAAATGGCCTTCCGCAGC            |
| FERMT1 Forward primer  | AAGATGGTGAGGTTGCGAGTC          |
| FERMT1 Reverse primer  | ATGGTGGATGATGCTGGTGTT          |
| MYB Forward primer     | CAGGAAGGTTATCTGCAGGAGTCTTCAAAA |
| MYB Reverse primer     | CTATAGGCGGAGCCTGAGCAAAA        |
| LBR Forward primer     | TTCATGCTGGCTTTTGGAG            |
| LBR Reverse primer     | CTTTGGATCACTGGGATTTTTC         |
| ZNF703 Forward primer  | AACGGCCCACATGAGTCAAT           |
| ZNF703 Reverse primer  | GGCGGGGATCATGTTCGTTAT          |
| CLDN4 Forward primer   | CGGCCCAACATCATCCAA             |
| CLDN4 Reverse primer   | GGCGGAGTAAGGCTTGTCT            |
| EPHB4 Forward primer   | TCAATGTCACCACTGACCGAGAGGTA     |
| EPHB4 Reverse primer   | GGTATTTGACCTCGTAGTCCAGCACA     |
| SLC28A3 Forward primer | CCCTTCCAGAAAGCGTGACATCTC       |
| SLC28A3 Reverse primer | TGTTGATGAGTATGCCTGCGATGG       |
| PTPN12 Forward primer  | AGTTGCCTTGTTGAAGGGGAT          |
| PTPN12 Reverse primer  | AGAAGGTGTCAAGATGGGTGG          |
| Notch1 Forward primer  | CGTGCTATGTTGTGGACCATGGC        |
| Notch1 Reverse primer  | CACACTCGTGGGTGGTGTCCCCCG       |
| Notch2 Forward primer  | TCAACTGCCAAGCGGATGT            |
| Notch2 Reverse primer  | CTTGGCTGCTTCATAGCTCC           |

|                       |                          |
|-----------------------|--------------------------|
| CTBP2 Forward primer  | ACTGTGGCCTTCTGTGACGC     |
| CTBP2 Reverse primer  | CTGGTGAGGGTGATGGTGTG     |
| ACTA2 Forward primer  | TCTGGCACCACTCTTTCTAT     |
| ACTA2 Reverse primer  | CATGAGGTAGTCGGTGAGAT     |
| TGFBR1 Forward primer | TGTCAAAGTCAGTCCGTTGGGTCT |
| TGFBR1 Reverse primer | ACTTTGAAAGCCACACAAGCCCTG |
| SNAI1 Forward primer  | TCGGAAGCCTAACTACAGCGA    |
| SNAI1 Reverse primer  | AGATGAGCATTGGCAGCGAG     |
| SNAI2 Forward primer  | CGAACTGGACACACATACAGTG   |
| SNAI2 Reverse primer  | CTGAGGATCTCTGGTTGTGGT    |
| GAPDH Forward primer  | GTCTCCTCTGACTTCAACAGCG   |
| GAPDH Reverse primer  | ACCACCCTGTTGCTGTAGCCAA   |
