# Supplementary material for: Epigenetic Regulation of MAP3K8 in EBV-Associated Gastric Carcinoma
Source: MDPI journal article supplement (doi:10.3390/ijms24031964), 2023-01-19

Figures 3I and 3J\_SNU719 + MAP3K8 siRNA treatment

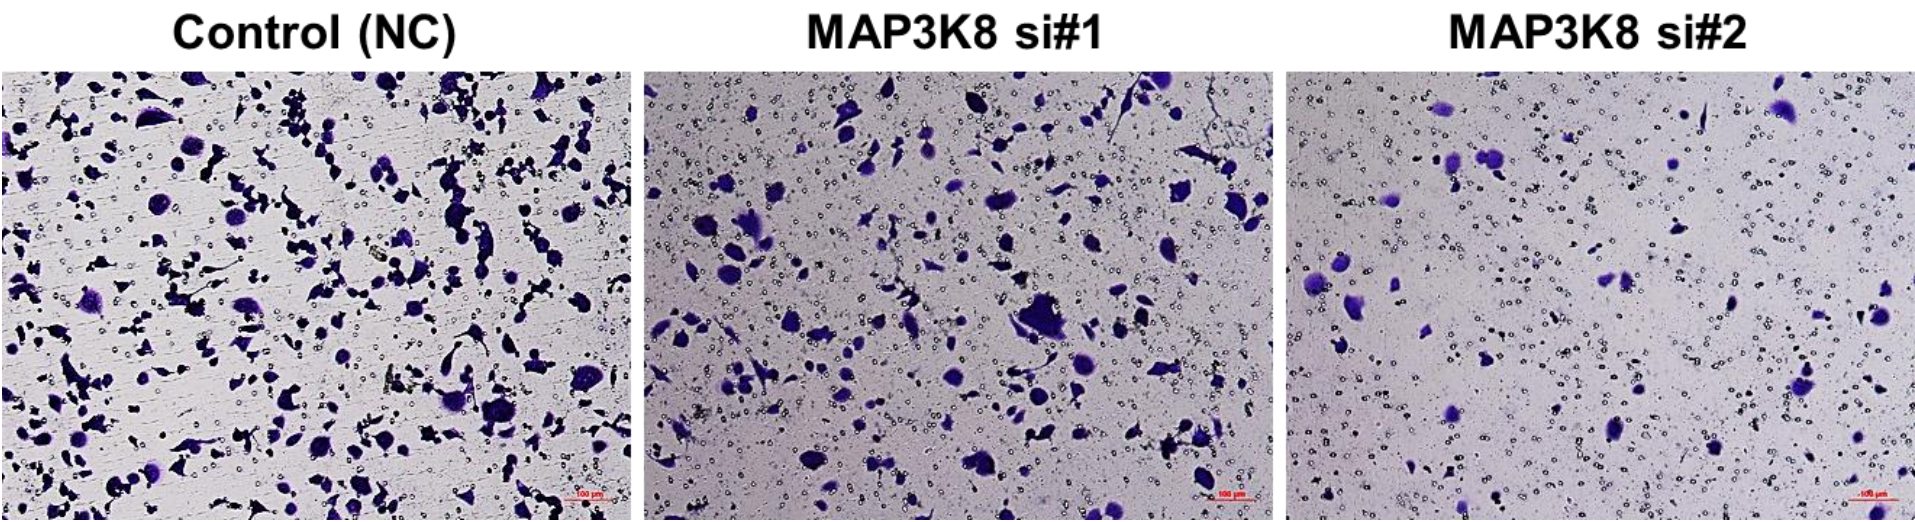

Pictures used: C1, si 1 2, and si 2 2

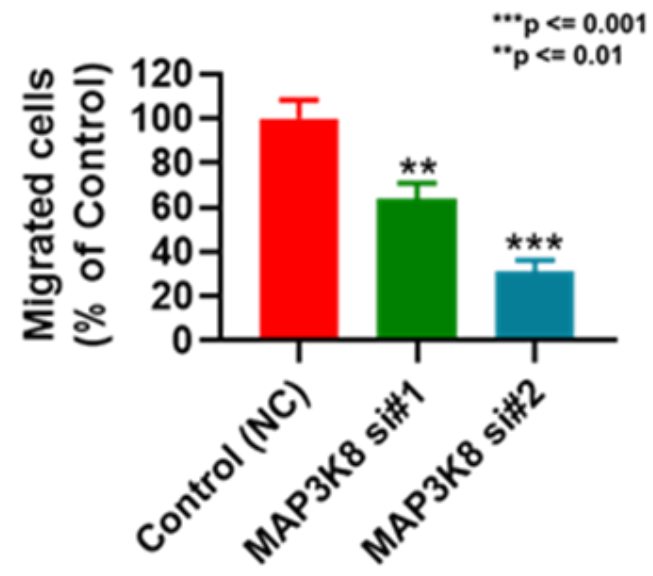



Figures 3I and 3J\_SNU719 + MAP3K8 siRNA treatment\_All 3 images

Control

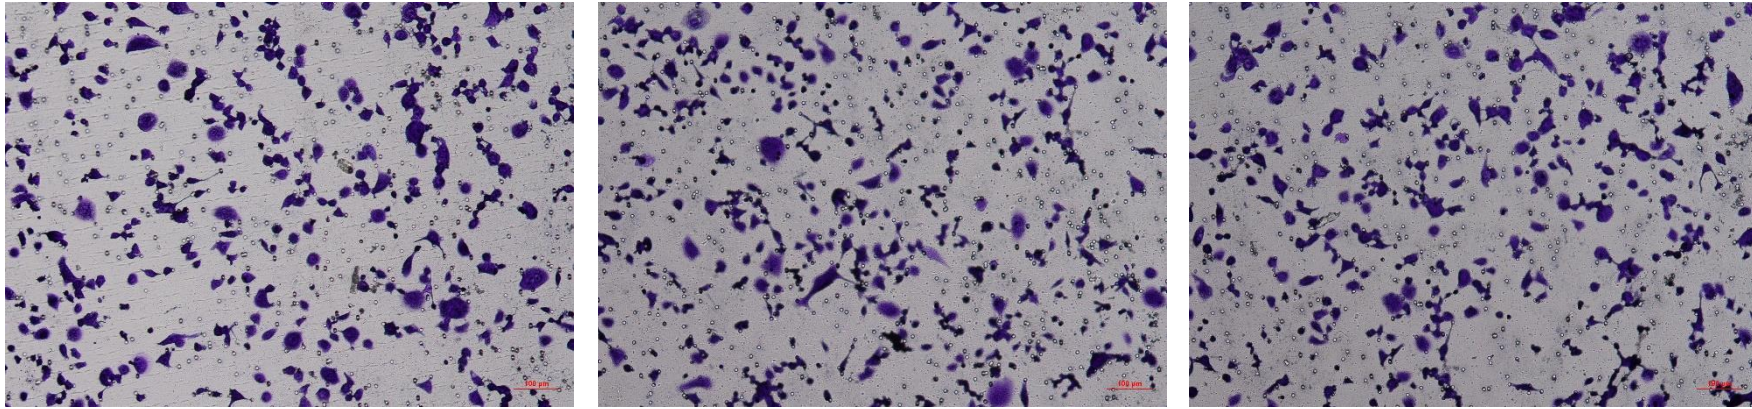

MAP3K8 si#1

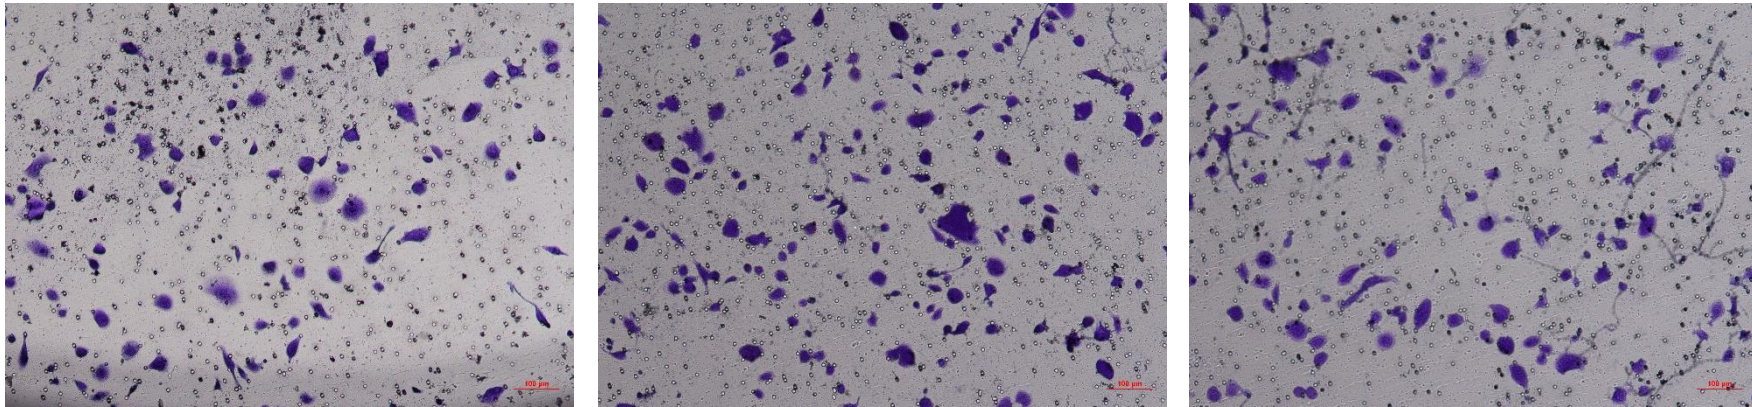

MAP3K8 si#2

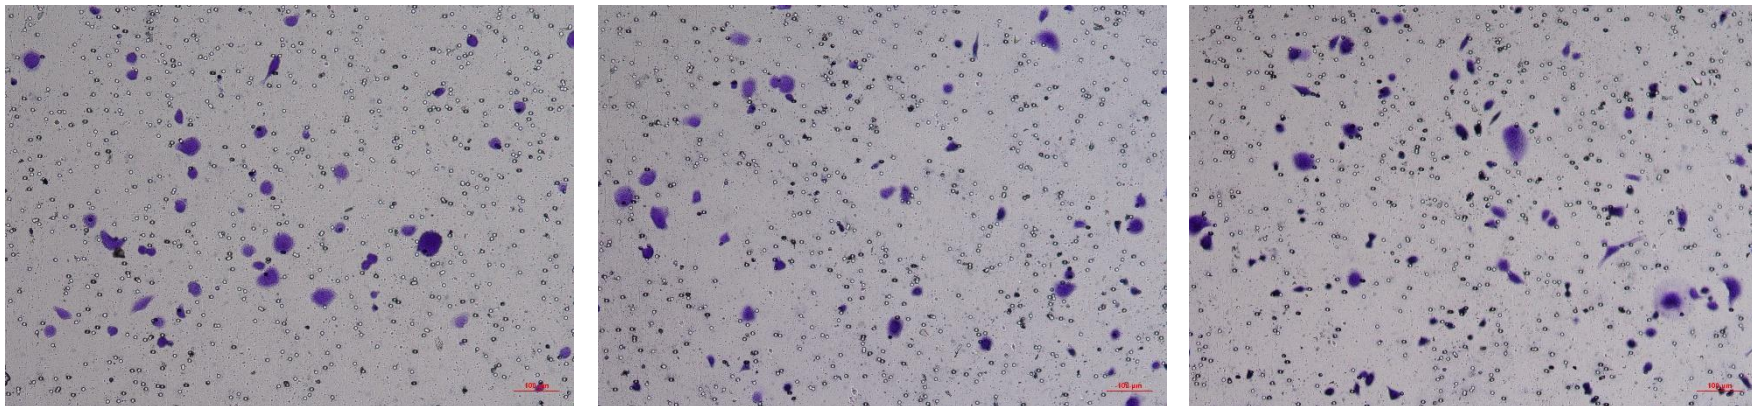

Supplement: s1 [file s1]
