# Supplementary material for: Epigenetic Regulation of MAP3K8 in EBV-Associated Gastric Carcinoma
Source: MDPI journal article supplement (doi:10.3390/ijms24031964), 2023-01-19

Figure 2F\_WB\_MAP3K8\_OTX015 treated SNU719 cells

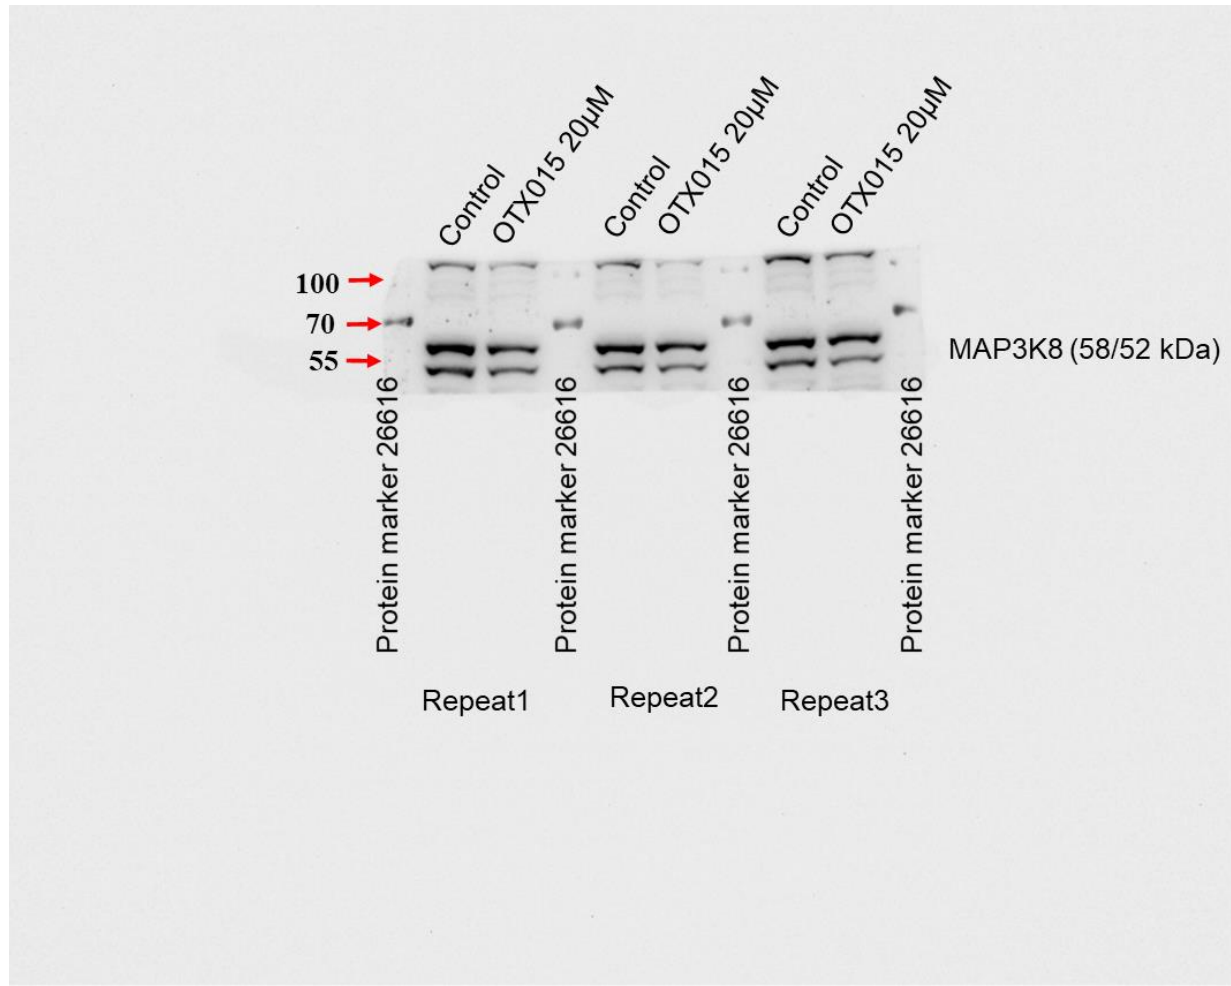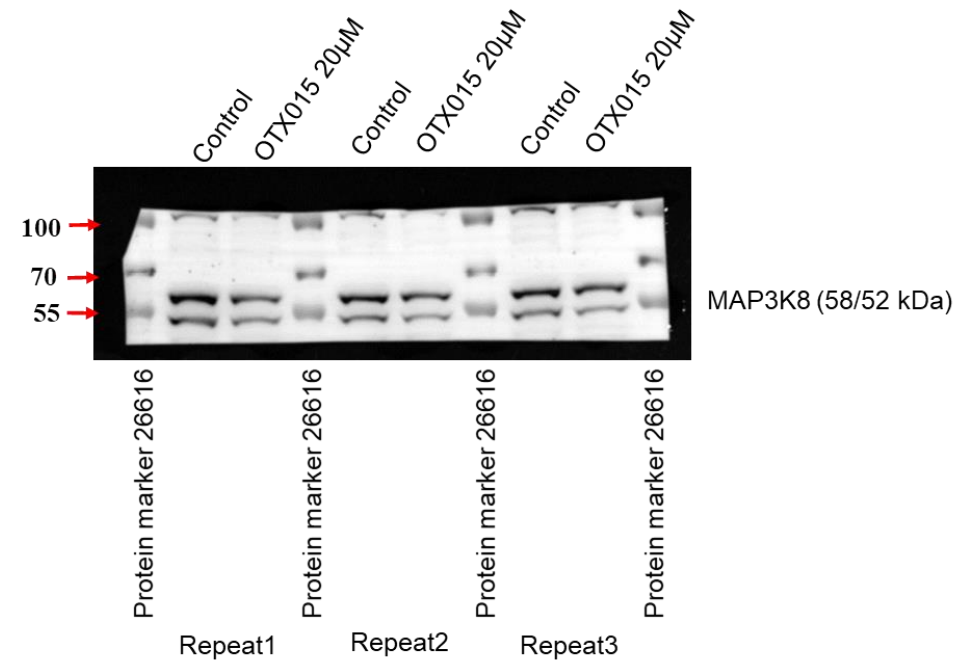

Figure 2F\_WB\_Actin\_OTX015 treated SNU719 cells

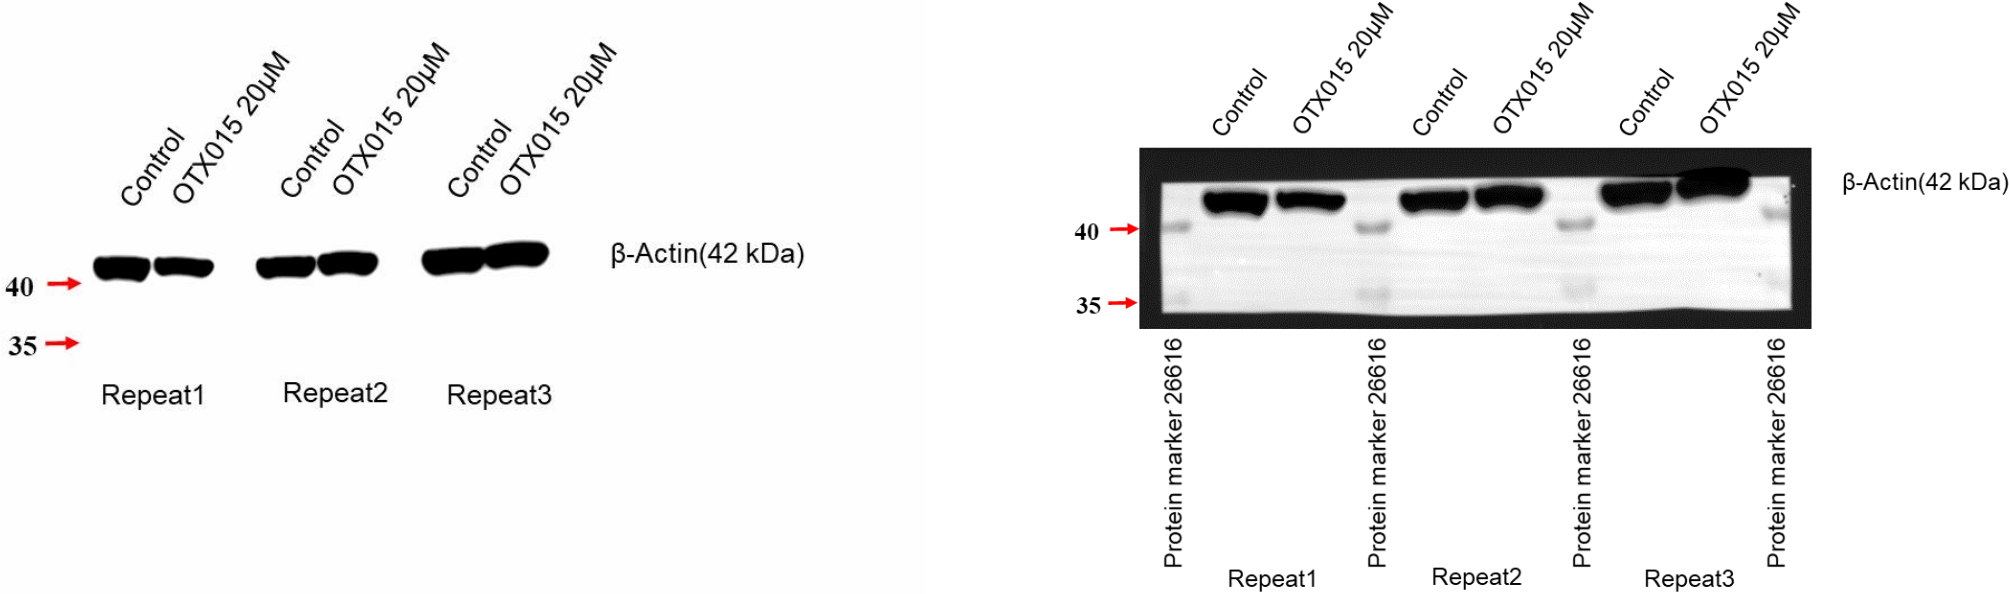

Figure 2I\_WB\_MAP3K8\_OTX015 treated YCCEL1 cells

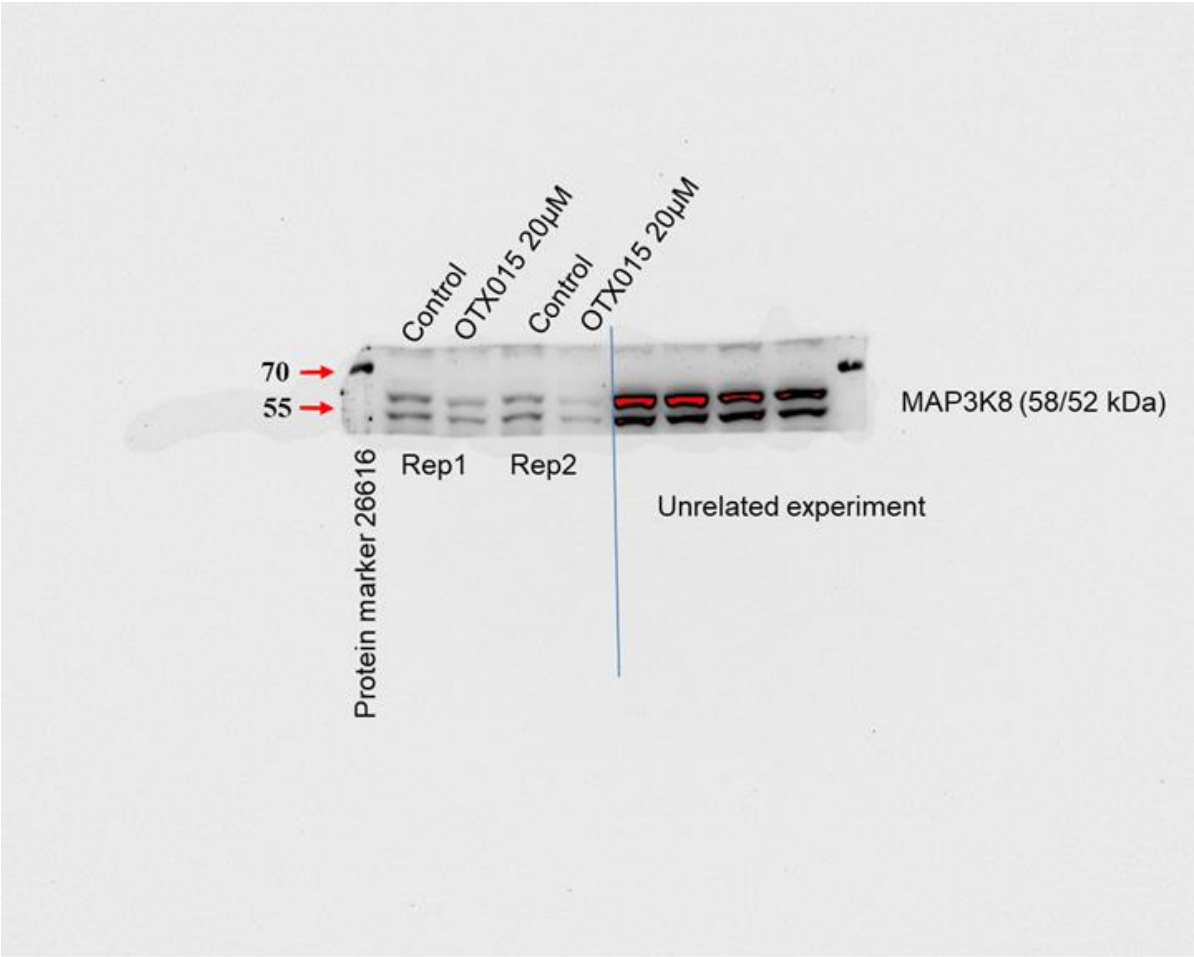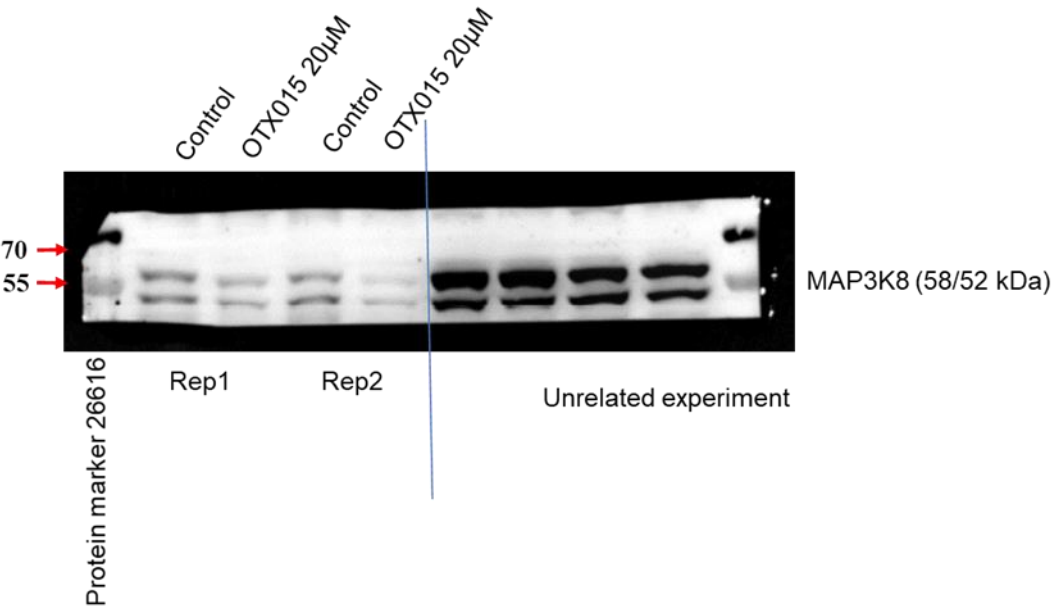

Figure 2I\_WB\_Actin\_OTX015 treated YCCEL1 cells

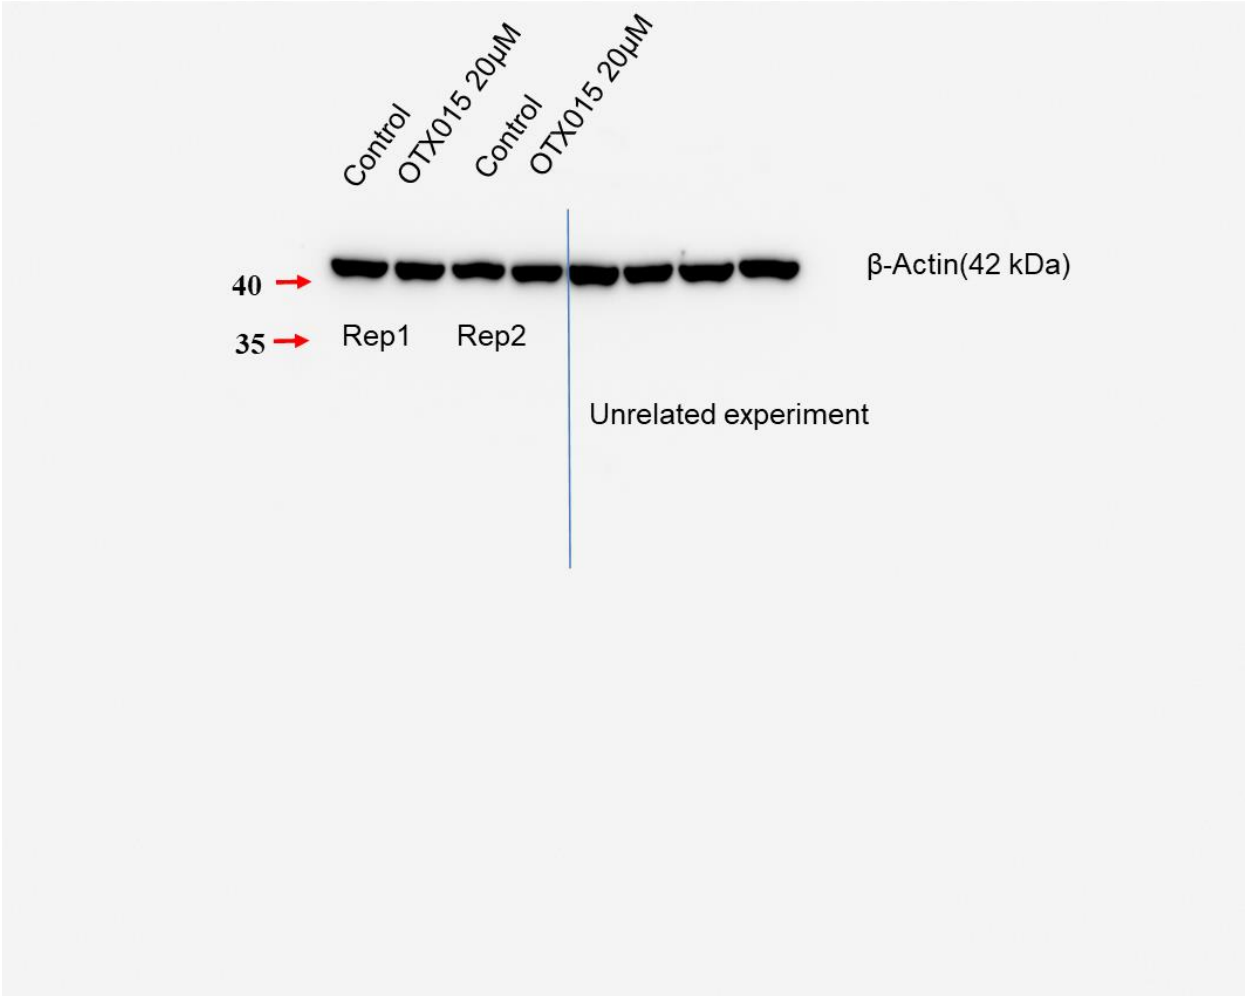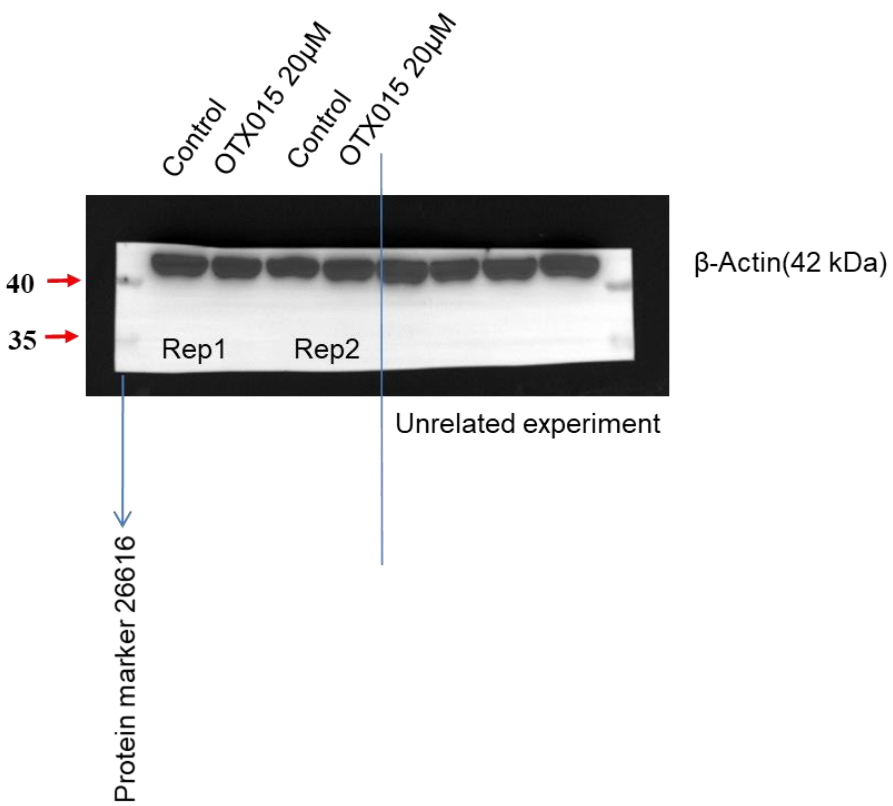

Figures 3A and 3C\_WB\_MAP3K8\_MAP3K8 siRNA treated EBVaGC cells

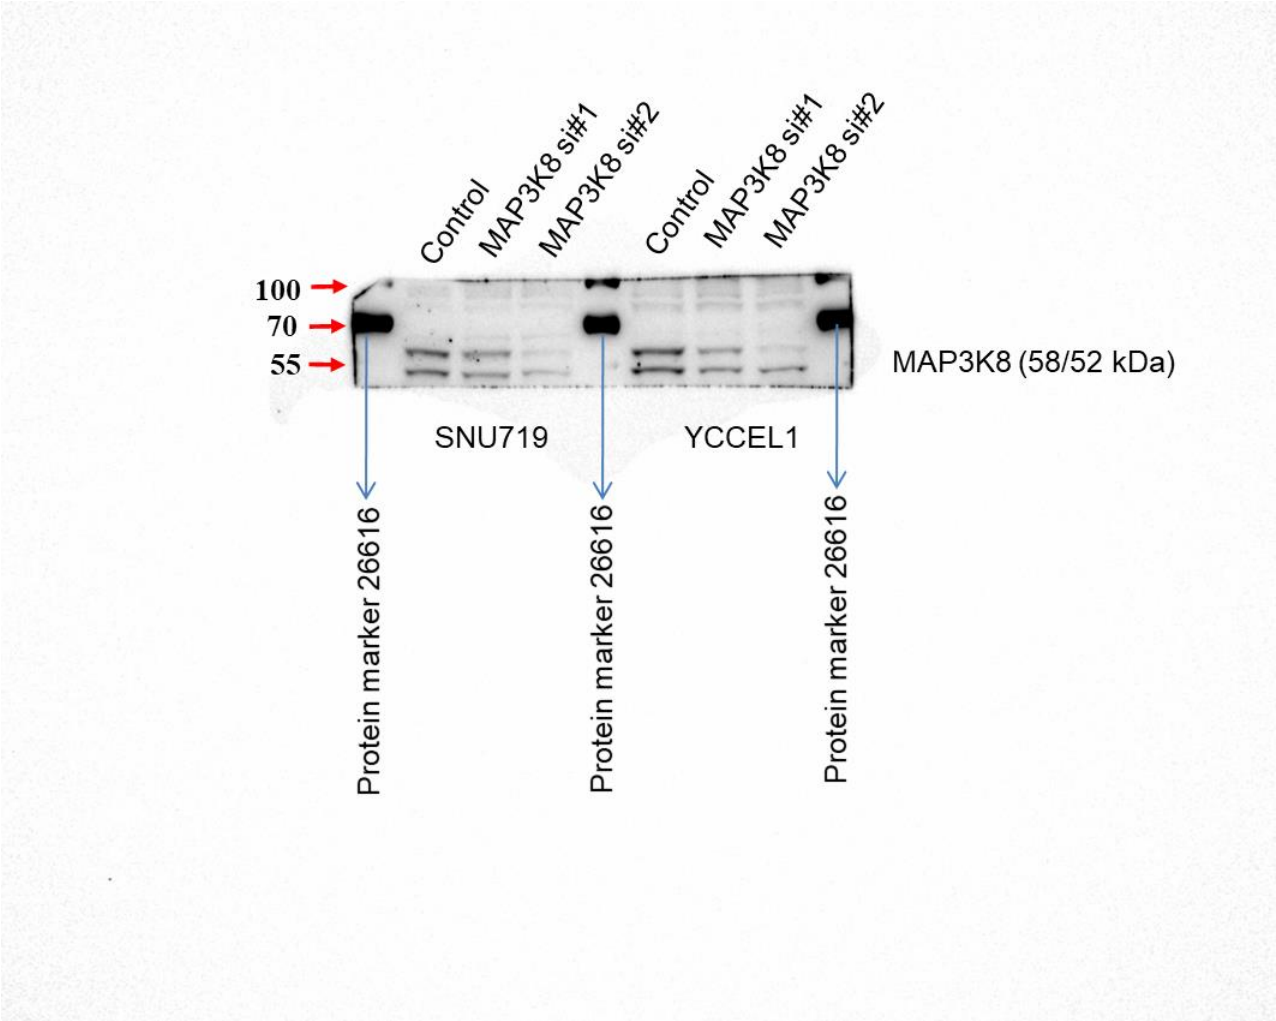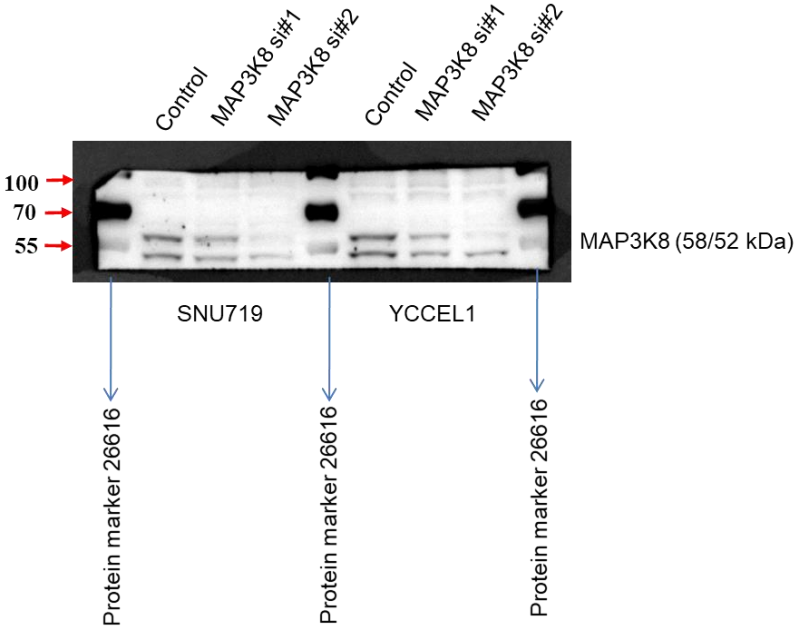

Figures 3A and 3C\_WB\_Actin\_MAP3K8 siRNA treated EBVaGC cells

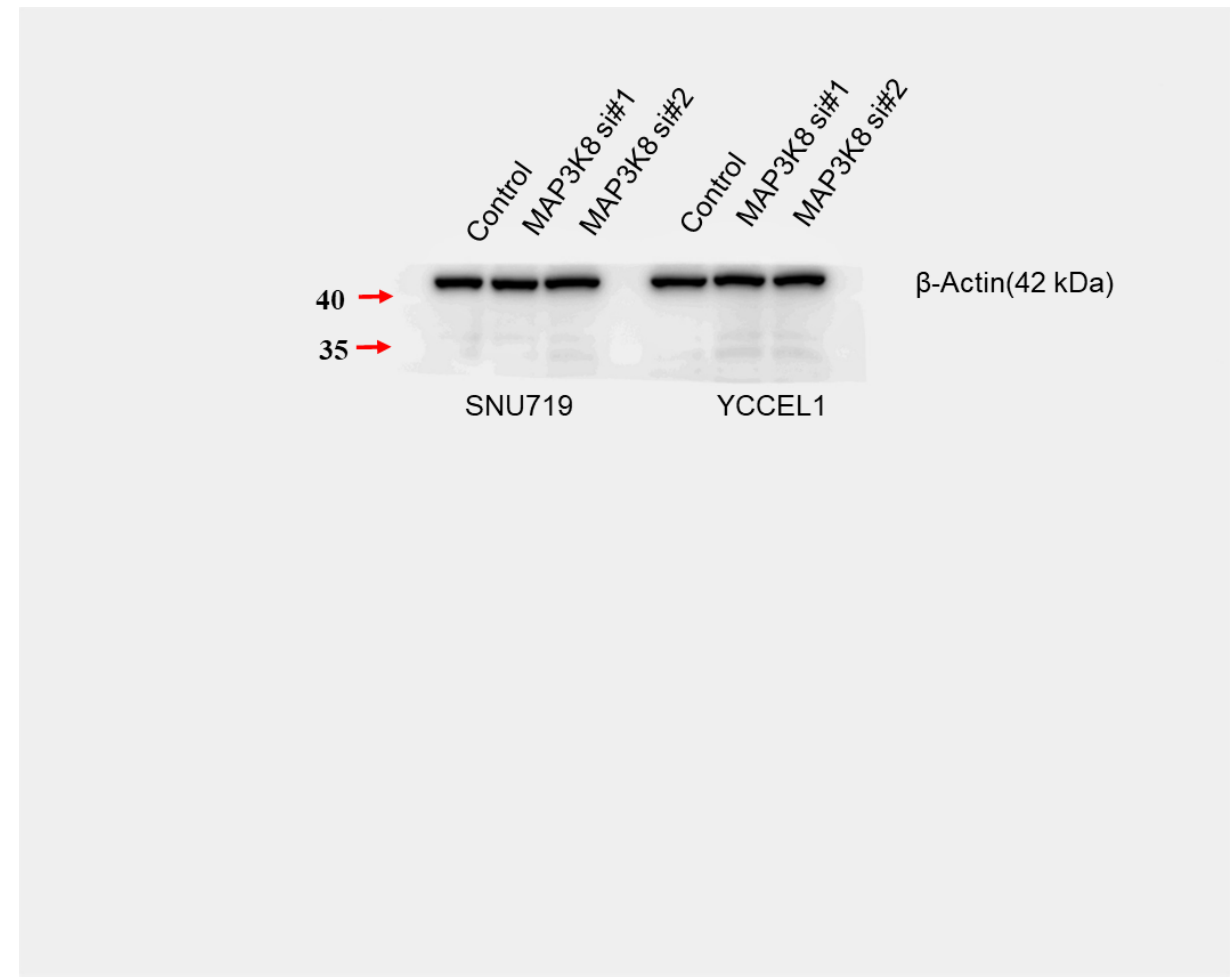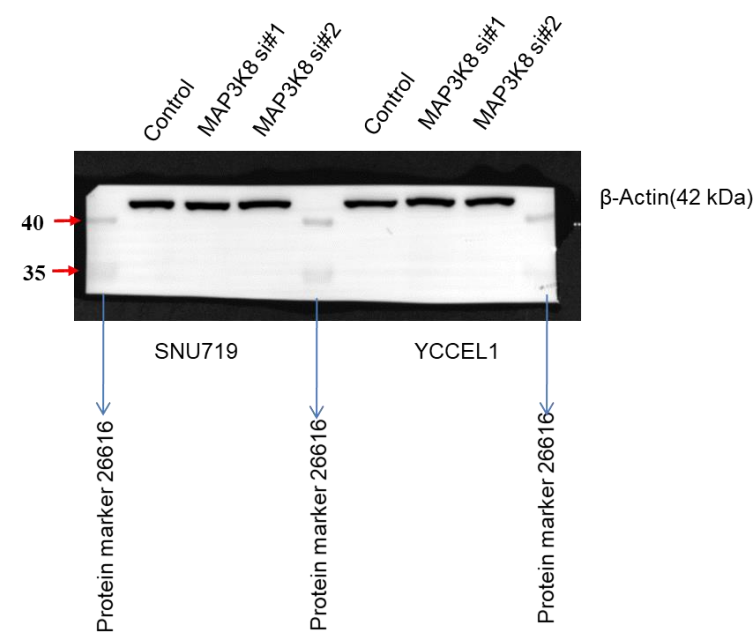

Supplement: s1 [file s1]
