# Supplementary material for: Epigenetic Regulation of MAP3K8 in EBV-Associated Gastric Carcinoma
Source: Int J Mol Sci. 2023 Jan 19;24(3):1964. doi: 10.3390/ijms24031964 (PMC9916342; doi:10.3390/ijms24031964)
Supplement: Supplementary file 1 [file ijms-24-01964-s001.zip]

Archive with 11 entries (11 files):
- Migration assay_MAP3K8 siRNA treated SNU19 cells.pdf
- Migration assay_MAP3K8 siRNA treated YCCEL1 cells.pdf
- Source data_Figure 1.xlsx
- Source data_Figure 2.xlsx
- Source data_Figure 3.xlsx
- Source data_Figure 4.xlsx
- Source data_Figure 5.xlsx
- Source data_Supplementary Figure S1.xlsx
- Supplementary Figure S1.pdf
- Supplementary Tables.pdf
- WB_Epigenetic regulation of MAP3K8 in EBV-associated Gastric Carcinoma.pdf
