# Supplementary material for: Epigenetic Regulation of MAP3K8 in EBV-Associated Gastric Carcinoma
Source: Int J Mol Sci. 2023 Jan 19;24(3):1964. doi: 10.3390/ijms24031964 (PMC9916342; doi:10.3390/ijms24031964)
Supplement: Supplementary file 1 [file ijms-24-01964-s001.zip › Source data_Figure 1.xlsx]

## Sheet: Figure 1A_GES-1_SE_ROSE_ann
seqnames	start	end	width	strand	NUM_LOCI	CONSTITUENT_SIZE	GES1.WT.chip_final.bam	REGION_ID	annotation	geneChr	geneStart	geneEnd	geneLength	geneStrand	geneId	transcriptId	distanceToTSS	ENSEMBL	SYMBOL	GENENAME	flank_txIds	flank_geneIds	flank_gene_distances	rankBy_vector	EnhancerTypes	rank
chr8	128806294	128846145	39852	*	6	13401	879821	6_GES1-WT_peak_40645_lociStitched	Promoter (<=1kb)	8	128808208	128808274	67	1	100302185	uc022bbf.1	0	ENSG00000283710	MIR1204	microRNA 1204	uc022bbf.1;uc010mdp.2	100302185;5820	0;0	879821	superEnhancer	25135
chr8	128863372	128944635	81264	*	12	21864	797964	12_GES1-WT_peak_40653_lociStitched	Promoter (<=1kb)	8	128902835	129113499	210665	1	5820	uc003ysl.3	0	ENSG00000249859	PVT1	Pvt1 oncogene	uc010mdp.2;uc003ysl.3	5820;5820	0;0	797964	superEnhancer	25134
chr8	129179576	129197492	17917	*	5	8097	704366	5_GES1-WT_peak_40672_lociStitched	Distal Intergenic	8	129162362	129162434	73	1	100302281	uc022bbk.1	17214	ENSG00000221261	MIR1208	microRNA 1208	NA	NA	NA	704366	superEnhancer	25133
chr1	121478612	121485519	6908	*	2	1818	406509	2_GES1-WT_peak_2511_lociStitched	Distal Intergenic	1	121306424	121313686	7263	1	647121	uc009wht.1	172188	ENSG00000231752	EMBP1	embigin pseudogene 1	NA	NA	NA	406509	superEnhancer	25132
chr16	46386093	46435532	49440	*	18	17252	390695	18_GES1-WT_peak_15623_lociStitched	Distal Intergenic	16	46503249	46552312	49064	2	124149	uc010cbd.2	116780	NA	ANKRD26P1	ankyrin repeat domain 26 pseudogene 1	NA	NA	NA	390695	superEnhancer	25131
chr3	170406344	170470966	64623	*	11	13428	240126	11_GES1-WT_peak_29170_lociStitched	3' UTR	3	170177342	170303863	126522	2	57709	uc003fgz.2	-102481	ENSG00000013293	SLC7A14	solute carrier family 7 member 14	uc011bpt.1	5010	0	240126	superEnhancer	25130
chr7	61967220	61976856	9637	*	4	3329	239953	4_GES1-WT_peak_37760_lociStitched	Distal Intergenic	7	62751670	62764434	12765	2	643955	uc011kdj.2	787578	ENSG00000185037	ZNF733P	zinc finger protein 733, pseudogene	NA	NA	NA	239953	superEnhancer	25129
chr1	218627536	218673615	46080	*	11	13487	227557	11_GES1-WT_peak_3941_lociStitched	Distal Intergenic	1	218517538	218519020	1483	2	728463	uc031psd.1	-108516	ENSG00000232480	TGFB2-AS1	TGFB2 antisense RNA 1 (head to head)	NA	NA	NA	227557	superEnhancer	25128
chr10	42383293	42409454	26162	*	12	6240	226484	12_GES1-WT_peak_5191_lociStitched	Distal Intergenic	10	42827314	42863493	36180	2	441666	uc010qey.2	454039	ENSG00000215146	LOC441666	zinc finger protein 91 pseudogene	NA	NA	NA	226484	superEnhancer	25127
chr9	114773670	114837655	63986	*	16	17610	213432	16_GES1-WT_peak_42264_lociStitched	3' UTR	9	114694380	114694449	70	1	100616114	uc022blz.1	79290	ENSG00000266315	MIR4668	microRNA 4668	uc022bma.1;uc004bfu.3;uc010mui.3;uc010muj.3	100422990;64420;64420;64420	0;0;0;0	213432	superEnhancer	25126
chr9	81588227	81644004	55778	*	9	13454	192484	9_GES1-WT_peak_41687_lociStitched	Distal Intergenic	9	82186878	82341656	154779	1	7091	uc004alc.3	-542874	ENSG00000106829	TLE4	TLE family member 4, transcriptional corepressor	NA	NA	NA	192484	superEnhancer	25125
chr8	127583235	127601960	18726	*	3	6484	170062	3_GES1-WT_peak_40623_lociStitched	Distal Intergenic	8	127564683	127570711	6029	2	157638	uc003yrz.2	-12524	ENSG00000168672	LRATD2	LRAT domain containing 2	NA	NA	NA	170062	superEnhancer	25124
chr20	33892558	33927634	35077	*	8	10515	161445	8_GES1-WT_peak_24892_lociStitched	Promoter (<=1kb)	20	33890369	33894862	4494	2	55245	uc002xcc.3	0	ENSG00000101019	UQCC1	ubiquinol-cytochrome c reductase complex assembly factor 1	uc002xcc.3;uc010zuy.2;uc021wcl.1;uc002xcd.3;uc002xcf.3;uc002xcg.3;uc010gfb.3;uc010zuz.2;uc010zva.2;uc010zvb.2;uc002xci.1;uc010gfd.2;uc010gfc.1	55245;55245;55245;55245;55245;55245;55245;55245;55245;55245;55245;55245;8200	0;0;0;0;0;0;0;0;0;0;0;0;0	161445	superEnhancer	25123
chr10	117695508	117709114	13607	*	4	5975	161267	4_GES1-WT_peak_6456_lociStitched	3' UTR	10	117816442	118031819	215378	2	2674	uc001lci.3	322705	ENSG00000151892	GFRA1	GDNF family receptor alpha 1	uc001lcg.3;uc010qsm.2;uc010qsn.2	26033;26033;26033	0;0;0	161267	superEnhancer	25122
chr10	95195464	95242427	46964	*	11	12592	161195	11_GES1-WT_peak_6058_lociStitched	Promoter (<=1kb)	10	95066186	95242074	175889	2	26509	uc001kin.3	0	ENSG00000138119	MYOF	myoferlin	uc001kin.3;uc001kio.3;uc001kip.4;uc009xuf.2	26509;26509;26509;26509	0;0;0;0	161195	superEnhancer	25121
chr8	127625930	127642514	16585	*	3	5568	158863	3_GES1-WT_peak_40626_lociStitched	Distal Intergenic	8	127564683	127570711	6029	2	157638	uc003yrz.2	-55219	ENSG00000168672	LRATD2	LRAT domain containing 2	NA	NA	NA	158863	superEnhancer	25120
chr1	198625496	198655228	29733	*	9	9265	158263	9_GES1-WT_peak_3467_lociStitched	Intron (uc031prk.1/5788, intron 2 of 3)	1	198608418	198672501	64084	1	5788	uc001guw.1	17078	ENSG00000081237	PTPRC	protein tyrosine phosphatase receptor type C	uc031prk.1;uc009wze.2;uc009wzf.2;uc010ppg.2;uc021pgy.2;uc001gur.2;uc001gut.2;uc001guu.1;uc001guv.1;uc001guw.1	5788;5788;5788;5788;5788;5788;5788;5788;5788;5788	0;0;0;0;0;0;0;0;0;0	158263	superEnhancer	25119
chr3	192596324	192648446	52123	*	12	11589	152126	12_GES1-WT_peak_29530_lociStitched	Promoter (<=1kb)	3	192514605	192635950	121346	2	151963	uc011bsp.2	0	ENSG00000180611	MB21D2	Mab-21 domain containing 2	uc011bsp.2	151963	0	152126	superEnhancer	25118
chr9	81480017	81494886	14870	*	5	5861	147018	5_GES1-WT_peak_41678_lociStitched	Distal Intergenic	9	80912059	80945009	32951	1	29968	uc004alb.3	567958	ENSG00000135069	PSAT1	phosphoserine aminotransferase 1	NA	NA	NA	147018	superEnhancer	25117
chr1	240946587	240995729	49143	*	10	10406	144761	10_GES1-WT_peak_4364_lociStitched	Promoter (<=1kb)	1	240938817	240950738	11922	2	6000	uc010pyi.1	0	ENSG00000182901	RGS7	regulator of G protein signaling 7	uc010pyh.2;uc010pyi.1;uc001hyt.2;uc010pyj.1;uc001hyu.2;uc009xgn.1;uc001hyv.2;uc001hyw.2	6000;6000;6000;6000;6000;6000;6000;6000	0;0;0;0;0;0;0;0	144761	superEnhancer	25116
chr19	43608739	43669053	60315	*	12	15029	144696	12_GES1-WT_peak_20399_lociStitched	Intron (uc010xwk.2/5675, intron 1 of 3)	19	43671895	43690688	18794	2	5673	uc002ovu.3	21635	ENSG00000204941	PSG5	pregnancy specific beta-1-glycoprotein 5	uc002ovu.3;uc002ovx.3;uc010xwk.2	5673;5673;5675	0;0;0	144696	superEnhancer	25115
chr7	28076017	28102432	26416	*	6	7893	144432	6_GES1-WT_peak_37256_lociStitched	Intron (uc003szn.3/221895, intron 1 of 4)	7	27870193	28031675	161483	2	221895	uc003szm.3	-44342	ENSG00000153814	JAZF1	JAZF zinc finger 1	uc003szn.3	221895	0	144432	superEnhancer	25114
chr9	127013955	127083126	69172	*	10	13474	141139	10_GES1-WT_peak_42534_lociStitched	Promoter (<=1kb)	9	127019885	127114719	94835	1	10783	uc004bof.3	0	ENSG00000119408	NEK6	NIMA related kinase 6	uc004bof.3;uc004bog.3;uc004boh.3;uc010mwk.3;uc004boi.3;uc022bnf.1;uc022bng.1	10783;10783;10783;10783;10783;10783;10783	0;0;0;0;0;0;0	141139	superEnhancer	25113
chr5	14142854	14191360	48507	*	8	10000	140530	8_GES1-WT_peak_31743_lociStitched	Promoter (<=1kb)	5	14143829	14509458	365630	1	7204	uc003jff.3	0	ENSG00000038382	TRIO	trio Rho guanine nucleotide exchange factor	uc003jff.3;uc003jfg.3;uc011cna.1	7204;7204;7204	0;0;0	140530	superEnhancer	25112
chr8	129120056	129122691	2636	*	1	2637	137220	1_GES1-WT_peak_40665_lociStitched	Distal Intergenic	8	129162362	129162434	73	1	100302281	uc022bbk.1	-39671	ENSG00000221261	MIR1208	microRNA 1208	NA	NA	NA	137220	superEnhancer	25111
chr7	100728331	100782757	54427	*	10	10970	137194	10_GES1-WT_peak_38330_lociStitched	Promoter (<=1kb)	7	100770370	100782547	12178	1	5054	uc003uxt.4	0	ENSG00000106366	SERPINE1	serpin family E member 1	uc003uxt.4;uc011kkj.3;uc003uxu.2;uc003uxq.3;uc003uxr.3	5054;5054;5054;81844;81844	0;0;0;0;0	137194	superEnhancer	25110
chr2	92268967	92326065	57099	*	14	13005	135901	14_GES1-WT_peak_22247_lociStitched	Distal Intergenic	2	92129159	92130496	1338	1	440888	uc010yuc.2	139808	ENSG00000280263	ACTR3BP2	ACTR3B pseudogene 2	NA	NA	NA	135901	superEnhancer	25109
chr5	95545218	95592364	47147	*	8	13163	132332	8_GES1-WT_peak_32856_lociStitched	Distal Intergenic	5	95414842	95414916	75	1	693168	uc021ybp.1	130376	ENSG00000207578	MIR583	microRNA 583	NA	NA	NA	132332	superEnhancer	25108
chr10	96971090	97034428	63339	*	12	16861	132226	12_GES1-WT_peak_6102_lociStitched	3' UTR	10	96997325	97050905	53581	2	9124	uc001kkh.4	16477	ENSG00000107438	PDLIM1	PDZ and LIM domain 1	uc001kke.3;uc009xuu.1;uc001kkh.4	142827;142827;9124	0;0;0	132226	superEnhancer	25107
chr5	57111243	57139362	28120	*	6	8802	132066	6_GES1-WT_peak_32289_lociStitched	Distal Intergenic	5	56775843	56778636	2794	2	345651	uc003jrm.3	-332607	ENSG00000169067	ACTBL2	actin beta like 2	NA	NA	NA	132066	superEnhancer	25106
chr22	46392774	46482417	89644	*	16	15480	131947	16_GES1-WT_peak_26896_lociStitched	Promoter (<=1kb)	22	46435787	46440748	4962	2	100271722	uc011aqv.2	0	NA	LINC00899	long intergenic non-protein coding RNA 899	uc011aqv.2;uc021wrm.1;uc011aqw.2;uc003bgr.4;uc003bgu.2;uc003bgt.4;uc003bgq.1;uc011aqu.1	100271722;100500828;150381;400931;400931;400931;55267;730668	0;-4507;0;0;0;0;0;0	131947	superEnhancer	25105
chr10	14416323	14459079	42757	*	10	11030	129579	10_GES1-WT_peak_4739_lociStitched	Exon (uc001imw.1/55691, exon 2 of 4)	10	14478575	14478660	86	1	100302116	uc021pne.1	-19496	ENSG00000221371	MIR1265	microRNA 1265	uc001imv.3;uc001imw.1	55691;55691	0;0	129579	superEnhancer	25104
chr19	43378197	43404869	26673	*	5	9692	129113	5_GES1-WT_peak_20369_lociStitched	Promoter (<=1kb)	19	43233275	43383871	150597	2	5669	uc002oug.1	0	ENSG00000231924	PSG1	pregnancy specific beta-1-glycoprotein 1	uc002oug.1;uc002oun.3;uc002ouz.2;uc002ova.2;uc002ovb.3;uc002ovc.3;uc002ovd.1;uc002ouf.3;uc002ovg.2;uc010xwk.2;uc002ovj.2	5669;5669;5669;5669;5669;5669;5669;5671;5675;5675;5675	0;0;0;0;0;0;0;0;0;0;0	129113	superEnhancer	25103
chr5	64480863	64505992	25130	*	7	9538	128120	7_GES1-WT_peak_32386_lociStitched	Exon (uc003jto.4/11174, exon 21 of 25)	5	64444563	64769779	325217	2	11174	uc003jto.4	263787	ENSG00000049192	ADAMTS6	ADAM metallopeptidase with thrombospondin type 1 motif 6	uc003jto.4;uc003jtp.3;uc003jtq.3;uc003jtr.1	11174;11174;11174;11174	0;0;0;0	128120	superEnhancer	25102
chr5	172324099	172386273	62175	*	11	13746	126924	11_GES1-WT_peak_34018_lociStitched	Promoter (<=1kb)	5	172381786	172385778	3993	2	100268168	uc011dfb.2	0	ENSG00000204758	LOC100268168	uncharacterized LOC100268168	uc011dfb.2;uc011dfc.2;uc003mcc.3;uc003mbw.4;uc003mby.4;uc003mbz.4;uc011dfa.2;uc003mca.4	100268168;100268168;51121;57222;57222;57222;57222;57222	0;0;-166;0;0;0;0;0	126924	superEnhancer	25101
chr6	58776232	58779563	3332	*	1	3333	123443	1_GES1-WT_peak_35452_lociStitched	Distal Intergenic	6	58272360	58287724	15365	2	375513	uc003ped.4	-488508	NA	GUSBP4	GUSB pseudogene 4	NA	NA	NA	123443	superEnhancer	25100
chr7	47797745	47836334	38590	*	6	9035	122940	6_GES1-WT_peak_37663_lociStitched	Promoter (<=1kb)	7	47834889	47859444	24556	1	80099	uc003tnz.4	0	ENSG00000136275	PKD1L1-AS1	PKD1L1 antisense RNA 1	uc003tny.2;uc003tnz.4;uc003toa.1;uc003tnx.3	168507;80099;80099;84847	0;0;0;0	122940	superEnhancer	25099
chr8	67367927	67473660	105734	*	19	20675	120516	19_GES1-WT_peak_39959_lociStitched	Promoter (<=1kb)	8	67405491	67430759	25269	1	254778	uc003xwg.3	0	ENSG00000169085	VXN	vexin	uc011leq.1;uc011ler.1;uc003xwb.4;uc003xwc.4;uc003xwd.4;uc003xwe.4;uc003xwf.4;uc011les.2;uc003xwg.3;uc003xwh.3;uc011let.2;uc003xwi.3;uc003xwj.3;uc003xwk.3;uc003xwl.3	137872;137872;137872;137872;137872;137872;137872;137872;254778;254778;254778;254778;4603;4603;4603	0;0;0;0;0;0;0;0;0;0;0;0;0;0;0	120516	superEnhancer	25098
chr19	39138367	39191354	52988	*	12	13358	118884	12_GES1-WT_peak_20233_lociStitched	Promoter (<=1kb)	19	39138267	39221171	82905	1	81	uc021uug.1	100	ENSG00000130402	ACTN4	actinin alpha 4	uc010egc.2;uc002oja.2;uc021uug.1	81;81;81	0;0;0	118884	superEnhancer	25097
chr12	52557515	52638577	81063	*	13	13185	117071	13_GES1-WT_peak_9644_lociStitched	Promoter (<=1kb)	12	52562780	52579533	16754	2	144501	uc001rzw.3	0	ENSG00000167767	KRT80	keratin 80	uc001rzw.3;uc001rzx.3;uc001rzy.3;uc001rzz.3;uc010snp.2;uc001saa.1;uc010snq.2	144501;144501;144501;283403;283404;3855;3892	0;0;0;0;0;0;0	117071	superEnhancer	25096
chr9	132236514	132272400	35887	*	6	8382	115617	6_GES1-WT_peak_42728_lociStitched	Promoter (<=1kb)	9	132245730	132266538	20809	1	100506190	uc004bxv.3	0	NA	LINC00963	long intergenic non-protein coding RNA 963	uc004bxv.3;uc004bxw.3;uc004bxx.3;uc004bxy.2;uc004bxz.2	100506190;100506190;100506190;100506190;100506190	0;0;0;0;0	115617	superEnhancer	25095
chr11	65239104	65275645	36542	*	13	8725	113346	13_GES1-WT_peak_7678_lociStitched	Promoter (<=1kb)	11	65265233	65273939	8707	1	378938	uc010roh.3	0	ENSG00000251562	MALAT1	metastasis associated lung adenocarcinoma transcript 1	uc010roh.3	378938	0	113346	superEnhancer	25094
chr5	14264338	14270241	5904	*	4	4524	112693	4_GES1-WT_peak_31752_lociStitched	Intron (uc003jff.3/7204, intron 1 of 56)	5	14293121	14489274	196154	1	7204	uc003jfh.1	-22880	ENSG00000038382	TRIO	trio Rho guanine nucleotide exchange factor	uc003jff.3;uc003jfg.3;uc011cna.1	7204;7204;7204	0;0;0	112693	superEnhancer	25093
chr5	149828465	149877837	49373	*	9	8089	107697	9_GES1-WT_peak_33646_lociStitched	Promoter (<=1kb)	5	149877340	149937773	60434	1	3340	uc011dcj.2	0	ENSG00000070614	NDST1	N-deacetylase and N-sulfotransferase 1	uc011dcj.2;uc003lsh.3;uc003lsi.3;uc003lsj.3	3340;6208;6208;6208	0;0;0;0	107697	superEnhancer	25092
chr3	134030339	134053431	23093	*	7	7882	105701	7_GES1-WT_peak_28684_lociStitched	Distal Intergenic	3	134074190	134085683	11494	2	51421	uc003eqe.1	32252	ENSG00000114019	AMOTL2	angiomotin like 2	NA	NA	NA	105701	superEnhancer	25091
chr20	52352449	52392651	40203	*	8	9816	105103	8_GES1-WT_peak_25322_lociStitched	Distal Intergenic	20	52491040	52492248	1209	2	391257	uc010gik.4	99597	NA	SUMO1P1	SUMO1 pseudogene 1	NA	NA	NA	105103	superEnhancer	25090
chr8	128747085	128756245	9161	*	2	5305	104041	2_GES1-WT_peak_40637_lociStitched	Promoter (<=1kb)	8	128747765	128751018	3254	1	4609	uc003ysh.1	0	ENSG00000136997	MYC	MYC proto-oncogene, bHLH transcription factor	uc003ysh.1;uc022bbe.1;uc003ysi.3	4609;4609;4609	0;0;0	104041	superEnhancer	25089
chr19	27731843	27738706	6864	*	4	2930	103717	4_GES1-WT_peak_20054_lociStitched	Distal Intergenic	19	28281401	28284848	3448	2	148189	uc002nrx.3	546142	ENSG00000261824	LINC00662	long intergenic non-protein coding RNA 662	NA	NA	NA	103717	superEnhancer	25088
chr11	65655672	65686431	30760	*	9	9337	102997	9_GES1-WT_peak_7702_lociStitched	Promoter (<=1kb)	11	65657875	65659106	1232	1	11007	uc001ogf.3	0	ENSG00000175602	CCDC85B	coiled-coil domain containing 85B	uc001ogj.2;uc001ogf.3;uc001ogc.1;uc001ogg.1;uc010ros.1;uc001ogi.3;uc009yqv.3;uc001ogd.3;uc001oge.3;uc010roq.1;uc010ror.1	10589;11007;1521;8061;8061;83638;83638;9158;9158;9158;9158	-297;0;8388;0;0;0;0;0;0;0;0	102997	superEnhancer	25087
chr8	59741614	59802278	60665	*	9	12619	100771	9_GES1-WT_peak_39890_lociStitched	Exon (uc003xtw.1/9760, exon 4 of 9)	8	59496064	59572404	76341	2	8439	uc003xtt.3	-169210	ENSG00000035681	NSMAF	neutral sphingomyelinase activation associated factor	uc003xtw.1	9760	0	100771	superEnhancer	25086
chr1	172854792	172937785	82994	*	16	16259	100340	16_GES1-WT_peak_3177_lociStitched	Distal Intergenic	1	173010360	173020103	9744	2	8995	uc001giu.2	82318	ENSG00000120337	TNFSF18	TNF superfamily member 18	NA	NA	NA	100340	superEnhancer	25085
chr5	14032745	14039205	6461	*	3	4163	97910.6	3_GES1-WT_peak_31735_lociStitched	Distal Intergenic	5	13690437	13944589	254153	2	1767	uc003jfd.2	-88156	ENSG00000039139	DNAH5	dynein axonemal heavy chain 5	NA	NA	NA	97910.6	superEnhancer	25084
chr17	62649472	62705933	56462	*	14	13086	97543.8	14_GES1-WT_peak_17846_lociStitched	Promoter (<=1kb)	17	62540735	62658386	117652	2	64750	uc002jep.1	0	ENSG00000108854	SMURF2	SMAD specific E3 ubiquitin protein ligase 2	uc002jep.1;uc002jeq.1;uc002jer.1	64750;64750;64750	0;0;0	97543.8	superEnhancer	25083
chr21	38065607	38081909	16303	*	4	3745	96880.6	4_GES1-WT_peak_25906_lociStitched	Promoter (<=1kb)	21	38071991	38082907	10917	1	6493	uc002yvp.3	0	ENSG00000159263	SIM2	SIM bHLH transcription factor 2	uc002yvp.3;uc002yvq.3;uc002yvr.2	6493;6493;6493	0;0;0	96880.6	superEnhancer	25082
chr8	128234527	128238465	3939	*	1	3940	96263.6	1_GES1-WT_peak_40632_lociStitched	Distal Intergenic	8	128427857	128429441	1585	1	5462	uc003ysf.3	-189392	ENSG00000212993	POU5F1B	POU class 5 homeobox 1B	NA	NA	NA	96263.6	superEnhancer	25081
chr11	73848691	73867202	18512	*	5	6651	95792.2	5_GES1-WT_peak_7934_lociStitched	Exon (uc001ouu.2/26005, exon 4 of 31)	11	73745480	73882064	136585	2	26005	uc001ouu.2	14862	ENSG00000168014	C2CD3	C2 domain containing 3 centriole elongation regulator	uc001ouu.2;uc001ouv.2	26005;26005	0;0	95792.2	superEnhancer	25080
chr1	205227794	205294618	66825	*	13	10467	95599.8	13_GES1-WT_peak_3666_lociStitched	Promoter (<=1kb)	1	205271191	205290883	19693	2	81788	uc001hce.3	0	ENSG00000163545	NUAK2	NUAK family kinase 2	uc001hce.3;uc009xbj.1;uc021pia.1;uc010prf.2;uc001hca.3;uc001hcb.2;uc001hcc.2;uc001hcd.3	81788;81788;9911;9911;9911;9911;9911;9911	0;0;0;0;0;0;0;0	95599.8	superEnhancer	25079
chr9	5493828	5515772	21945	*	6	6669	93450.6	6_GES1-WT_peak_40987_lociStitched	Promoter (<=1kb)	9	5510545	5571282	60738	1	80380	uc003zjg.4	0	ENSG00000197646	PDCD1LG2	programmed cell death 1 ligand 2	uc003zjd.3;uc003zjg.4;uc011lmc.2;uc011lmd.2	55848;80380;80380;80380	0;0;0;0	93450.6	superEnhancer	25078
chr9	26259356	26266670	7315	*	5	4494	92762.2	5_GES1-WT_peak_41194_lociStitched	Distal Intergenic	9	26066673	26118406	51734	1	100506422	uc022beu.1	192683	ENSG00000276759	LOC100506422	putative deoxyuridine 5'-triphosphate nucleotidohydrolase-like protein FLJ16323	NA	NA	NA	92762.2	superEnhancer	25077
chr21	19744709	19776244	31536	*	6	7959	92473	6_GES1-WT_peak_25582_lociStitched	Promoter (<=1kb)	21	19641433	19775970	134538	2	5651	uc002ykw.3	0	ENSG00000154646	TMPRSS15	transmembrane serine protease 15	uc002ykw.3	5651	0	92473	superEnhancer	25076
chr17	57831284	57865134	33851	*	8	10727	92277.8	8_GES1-WT_peak_17736_lociStitched	5' UTR	17	57784863	57917952	133090	1	81671	uc010woj.2	46421	ENSG00000062716	VMP1	vacuole membrane protein 1	uc002ixu.4;uc010wog.2;uc010woh.2;uc010woi.2;uc010woj.2	81671;81671;81671;81671;81671	0;0;0;0;0	92277.8	superEnhancer	25075
chr19	2523743	2556088	32346	*	11	8409	92228.1	11_GES1-WT_peak_19430_lociStitched	5' UTR	19	2476354	2477249	896	1	4616	uc002lwc.1	47389	ENSG00000099860	GADD45B	growth arrest and DNA damage inducible beta	uc002lwd.2	2788	0	92228.1	superEnhancer	25074
chr7	130571117	130599371	28255	*	6	6746	91933.3	6_GES1-WT_peak_38736_lociStitched	Promoter (<=1kb)	7	130557251	130596911	39661	2	646329	uc022alq.1	0	NA	NA	NA	uc022alq.1;uc022alr.1;uc022als.1;uc022alt.1;uc003vqn.4	646329;646329;646329;646329;646329	0;0;0;0;0	91933.3	superEnhancer	25073
chr18	6714281	6767585	53305	*	15	12488	91348.8	15_GES1-WT_peak_18448_lociStitched	Distal Intergenic	18	6788493	6898721	110229	1	79822	uc002knc.3	-20908	ENSG00000088756	ARHGAP28	Rho GTPase activating protein 28	NA	NA	NA	91348.8	superEnhancer	25072
chr7	47610933	47645362	34430	*	7	8669	90757.5	7_GES1-WT_peak_37642_lociStitched	Promoter (<=1kb)	7	47314752	47621742	306991	2	64759	uc003tnw.3	0	ENSG00000136205	TNS3	tensin 3	uc003tnw.3	64759	0	90757.5	superEnhancer	25071
chr1	16465555	16514371	48817	*	11	10640	90086.9	11_GES1-WT_peak_520_lociStitched	Promoter (<=1kb)	1	16450832	16482582	31751	2	1969	uc001aya.2	0	ENSG00000142627	EPHA2	EPH receptor A2	uc001aya.2;uc010oca.2	1969;1969	0;0	90086.9	superEnhancer	25070
chr1	145089541	145098401	8861	*	3	4016	89325.1	3_GES1-WT_peak_2573_lociStitched	Promoter (<=1kb)	1	145096407	145116997	20591	1	9554	uc031poa.1	0	ENSG00000265808	SEC22B	SEC22 homolog B, vesicle trafficking protein	uc021ott.2;uc021ots.1;uc010oye.3;uc031pnx.1;uc031poa.1	100288142;100288142;400818;400818;9554	0;0;0;0;0	89325.1	superEnhancer	25069
chr10	42596742	42600382	3641	*	2	3008	88630.3	2_GES1-WT_peak_5203_lociStitched	Distal Intergenic	10	42827314	42863493	36180	2	441666	uc010qey.2	263111	ENSG00000215146	LOC441666	zinc finger protein 91 pseudogene	NA	NA	NA	88630.3	superEnhancer	25068
chr1	157963106	157990773	27668	*	4	8679	88180.7	4_GES1-WT_peak_2933_lociStitched	Promoter (<=1kb)	1	157963063	158065844	102782	1	55243	uc010pib.2	43	ENSG00000183853	KIRREL1	kirre like nephrin family adhesion molecule 1	uc001frn.4;uc010pib.2	55243;55243	0;0	88180.7	superEnhancer	25067
chr8	129138613	129141199	2587	*	1	2588	87968.6	1_GES1-WT_peak_40666_lociStitched	Distal Intergenic	8	129162362	129162434	73	1	100302281	uc022bbk.1	-21163	ENSG00000221261	MIR1208	microRNA 1208	NA	NA	NA	87968.6	superEnhancer	25066
chr1	198455504	198467203	11700	*	7	4884	87702	7_GES1-WT_peak_3451_lociStitched	Distal Intergenic	1	198492352	198509815	17464	2	127124	uc009wzd.3	42612	ENSG00000151418	ATP6V1G3	ATPase H+ transporting V1 subunit G3	NA	NA	NA	87702	superEnhancer	25065
chr9	97662257	97713834	51578	*	8	10951	86934.7	8_GES1-WT_peak_41959_lociStitched	Promoter (<=1kb)	9	97683486	97695955	12470	1	84909	uc004avb.2	0	ENSG00000148120	AOPEP	aminopeptidase O (putative)	uc004aux.2;uc004auy.3;uc004auz.1;uc004ava.3;uc004avb.2	84909;84909;84909;84909;84909	0;0;0;0;0	86934.7	superEnhancer	25064
chr2	36660739	36716399	55661	*	12	10902	86436	12_GES1-WT_peak_21389_lociStitched	Exon (uc002rpd.3/51232, exon 3 of 17)	2	36583370	36778278	194909	1	51232	uc002rpd.3	77369	ENSG00000150938	CRIM1	cysteine rich transmembrane BMP regulator 1	uc002rpd.3	51232	0	86436	superEnhancer	25063
chr5	139672051	139704177	32127	*	8	8162	86068.2	8_GES1-WT_peak_33415_lociStitched	Promoter (<=1kb)	5	139624635	139682689	58055	2	5201	uc003lff.1	0	ENSG00000113068	PFDN1	prefoldin subunit 1	uc003lff.1	5201	0	86068.2	superEnhancer	25062
chr3	148641761	148661418	19658	*	5	7346	85417.9	5_GES1-WT_peak_28864_lociStitched	Distal Intergenic	3	148709195	148742059	32865	1	2992	uc011bnp.2	-47777	ENSG00000163754	GYG1	glycogenin 1	NA	NA	NA	85417.9	superEnhancer	25061
chr11	87133432	87163645	30214	*	8	8777	85064.5	8_GES1-WT_peak_8120_lociStitched	Distal Intergenic	11	86748886	87039876	290991	1	65084	uc010rtt.2	384546	ENSG00000166575	TMEM135	transmembrane protein 135	NA	NA	NA	85064.5	superEnhancer	25060
chr1	95081613	95120383	38771	*	8	9624	83726	8_GES1-WT_peak_2061_lociStitched	Distal Intergenic	1	95005813	95007413	1601	2	2152	uc001dqt.3	-74200	ENSG00000117525	F3	coagulation factor III, tissue factor	NA	NA	NA	83726	superEnhancer	25059
chr20	30929549	30957421	27873	*	5	6640	82473.4	5_GES1-WT_peak_24818_lociStitched	Promoter (<=1kb)	20	30946147	30960352	14206	1	171023	uc002wxt.3	0	ENSG00000171456	ASXL1	ASXL transcriptional regulator 1	uc002wxt.3;uc002wxr.2;uc002wxs.3;uc021wbw.1;uc010geb.3	171023;171023;171023;171023;171023	0;0;0;0;0	82473.4	superEnhancer	25058
chr10	69833784	69867090	33307	*	7	8938	82218.3	7_GES1-WT_peak_5568_lociStitched	Promoter (<=1kb)	10	69681656	69835103	153448	2	26091	uc001jng.4	0	ENSG00000148634	HERC4	HECT and RLD domain containing E3 ubiquitin protein ligase 4	uc001jnf.4;uc001jng.4;uc001jnh.4;uc001jni.5;uc009xpr.3;uc001jnk.4;uc001jnl.2;uc001jnm.5;uc001jnn.5;uc001jno.4;uc001jnp.1;uc009xps.3;uc009xpt.3;uc010qit.3;uc010qiu.3	26091;26091;26091;26091;26091;26091;84665;84665;84665;84665;84665;84665;84665;84665;84665	-841;0;0;0;0;0;0;0;0;0;0;0;0;0;0	82218.3	superEnhancer	25057
chr17	48104505	48142788	38284	*	8	8917	82061.8	8_GES1-WT_peak_17571_lociStitched	Promoter (<=1kb)	17	48127713	48133103	5391	2	284080	uc021tzv.1	0	ENSG00000246640	PICART1	p53 inducible cancer associated RNA transcript 1	uc021tzv.1;uc010dbl.3;uc010dbm.3	284080;3675;3675	0;0;0	82061.8	superEnhancer	25056
chr6	161815115	161860112	44998	*	8	9784	81707.4	8_GES1-WT_peak_36656_lociStitched	Intron (uc011egf.2/5071, intron 4 of 6)	6	161574378	161695107	120730	2	56895	uc011ege.1	-120008	ENSG00000026652	AGPAT4	1-acylglycerol-3-phosphate O-acyltransferase 4	uc011egf.2;uc003qtv.4;uc003qtw.4;uc010kkd.3;uc003qtx.4;uc003qty.4;uc003qtz.4;uc021zhs.1;uc021zht.1;uc021zhu.1;uc021zhv.1;uc021zhw.1;uc021zhx.1;uc021zhy.1;uc031sqz.1	5071;5071;5071;5071;5071;5071;5071;5071;5071;5071;5071;5071;5071;5071;5071	0;0;0;0;0;0;0;0;0;0;0;0;0;0;0	81707.4	superEnhancer	25055
chr1	86035215	86050879	15665	*	7	6115	80544.7	7_GES1-WT_peak_1889_lociStitched	Promoter (<=1kb)	1	85784168	86044046	259879	2	23576	uc001dlc.3	0	ENSG00000153904	DDAH1	dimethylarginine dimethylaminohydrolase 1	uc001dlc.3;uc001dle.3	23576;3491	0;0	80544.7	superEnhancer	25054
chr19	43581136	43591948	10813	*	2	6216	80200	2_GES1-WT_peak_20388_lociStitched	Promoter (<=1kb)	19	43568362	43586893	18532	2	5670	uc002ovr.3	0	ENSG00000242221	PSG2	pregnancy specific beta-1-glycoprotein 2	uc002ovr.3;uc010xwk.2	5670;5675	0;0	80200	superEnhancer	25053
chr20	11757899	11791672	33774	*	6	7514	79048	6_GES1-WT_peak_24605_lociStitched	Distal Intergenic	20	11871477	11907243	35767	1	22903	uc002wny.3	-79805	ENSG00000132640	BTBD3	BTB domain containing 3	NA	NA	NA	79048	superEnhancer	25052
chr1	198226832	198248813	21982	*	6	7619	78684.6	6_GES1-WT_peak_3437_lociStitched	Exon (uc001gun.4/140609, exon 4 of 10)	1	198126128	198291548	165421	1	140609	uc021pgx.1	100704	ENSG00000151414	NEK7	NIMA related kinase 7	uc001gun.4;uc021pgx.1	140609;140609	0;0	78684.6	superEnhancer	25051
chr12	12956619	12998671	42053	*	9	7599	78428.8	9_GES1-WT_peak_9081_lociStitched	Promoter (<=1kb)	12	12966141	12974982	8842	1	51202	uc010shn.1	0	ENSG00000213782	DDX47	DEAD-box helicase 47	uc001rav.3;uc010shn.1;uc009zhw.1;uc001rax.3;uc001ray.3	51202;51202;51202;51202;51202	0;0;0;0;0	78428.8	superEnhancer	25050
chr22	36782460	36864136	81677	*	12	13429	78189.4	12_GES1-WT_peak_26590_lociStitched	Promoter (<=1kb)	22	36677323	36784063	106741	2	4627	uc003apg.3	0	ENSG00000100345	MYH9	myosin heavy chain 9	uc003apk.1;uc003apl.1;uc003apg.3	25828;25828;4627	0;0;0	78189.4	superEnhancer	25049
chr1	8137731	8198771	61041	*	9	13144	77583.1	9_GES1-WT_peak_319_lociStitched	Distal Intergenic	1	8071779	8086393	14615	2	54206	uc001aoz.3	-51338	ENSG00000116285	ERRFI1	ERBB receptor feedback inhibitor 1	NA	NA	NA	77583.1	superEnhancer	25048
chr15	96807762	96840278	32517	*	9	6512	77530.3	9_GES1-WT_peak_14854_lociStitched	Exon (uc031qud.1/644192, exon 2 of 8)	15	96869157	96883492	14336	1	7026	uc002btp.3	-28879	ENSG00000185551	NR2F2	nuclear receptor subfamily 2 group F member 2	uc031qud.1;uc002bto.2;uc031que.1	644192;644192;644192	0;0;0	77530.3	superEnhancer	25047
chr14	62013998	62061524	47527	*	10	9690	77345.4	10_GES1-WT_peak_12756_lociStitched	Promoter (<=1kb)	14	62037258	62121431	84174	1	400221	uc021rtz.1	0	ENSG00000232774	FLJ22447	uncharacterized LOC400221	uc021rtz.1;uc010tsa.2;uc001xfn.3;uc010tsb.2;uc001xfo.3	400221;5583;5583;5583;5583	0;0;0;0;0	77345.4	superEnhancer	25046
chr6	44618479	44636476	17998	*	6	7119	77069.2	6_GES1-WT_peak_35224_lociStitched	Distal Intergenic	6	44403378	44403459	82	1	100616352	uc021zaa.1	215101	ENSG00000266619	MIR4642	microRNA 4642	NA	NA	NA	77069.2	superEnhancer	25045
chr1	240249193	240270546	21354	*	6	6392	76915	6_GES1-WT_peak_4337_lociStitched	Promoter (<=1kb)	1	240255185	240638489	383305	1	56776	uc010pyd.2	0	ENSG00000155816	FMN2	formin 2	uc010pyd.2;uc010pye.2	56776;56776	0;0	76915	superEnhancer	25044
chr1	236065962	236082006	16045	*	6	5469	76170.4	6_GES1-WT_peak_4277_lociStitched	Distal Intergenic	1	235989623	236047008	57386	2	1130	uc001hxm.4	-18954	ENSG00000143669	LYST	lysosomal trafficking regulator	NA	NA	NA	76170.4	superEnhancer	25043
chr7	27135873	27224447	88575	*	18	14623	76032.8	18_GES1-WT_peak_37230_lociStitched	Promoter (<=1kb)	7	27179983	27195547	15565	1	100133311	uc003syr.2	0	ENSG00000254369	HOXA-AS3	HOXA cluster antisense RNA 3	uc003syr.2;uc003syp.3;uc003syg.3;uc022aap.1;uc022aar.1;uc031swt.1;uc003syz.1;uc003syd.3;uc003sye.3;uc003syh.3;uc011jzl.2;uc003syk.3;uc003sym.4;uc003syn.2;uc003syo.2;uc003sys.3;uc003syt.3;uc011jzm.2;uc003syw.4;uc003syx.3;uc003syy.3;uc022aas.1	100133311;100133311;100506311;100506311;100534589;100874323;221883;3198;3198;3199;3200;3200;3201;3202;3203;3204;3205;3206;3206;3207;3207;442920	0;0;0;0;0;0;-580;-248;-248;0;0;0;0;0;0;0;0;0;0;0;0;0	76032.8	superEnhancer	25042
chr19	13947390	13973264	25875	*	9	8413	76000.1	9_GES1-WT_peak_19813_lociStitched	Promoter (<=1kb)	19	13945330	13947473	2144	2	284454	uc002mxi.4	0	NA	MIR23AHG	miR-23a/27a/24-2 cluster host gene	uc002mxi.4;uc002mxh.1;uc010xng.1	284454;65249;65249	0;0;31784	76000.1	superEnhancer	25041
chr2	190228071	190259526	31456	*	6	7168	75658	6_GES1-WT_peak_23419_lociStitched	Distal Intergenic	2	190306159	190340264	34106	1	84128	uc002uql.1	-46633	ENSG00000115368	WDR75	WD repeat domain 75	NA	NA	NA	75658	superEnhancer	25040
chr7	34013020	34028039	15020	*	4	4860	75220.2	4_GES1-WT_peak_37379_lociStitched	Exon (uc011kap.2/168667, exon 7 of 16)	7	33944523	34195484	250962	1	168667	uc011kap.2	68497	ENSG00000164619	BMPER	BMP binding endothelial regulator	uc011kap.2	168667	0	75220.2	superEnhancer	25039
chr14	51987412	52022264	34853	*	8	11212	74972.3	8_GES1-WT_peak_12551_lociStitched	Exon (uc021rtb.1/uc021rtb.1, exon 1 of 1)	14	51955839	52197444	241606	1	122786	uc001wzb.4	31573	ENSG00000139926	FRMD6	FERM domain containing 6	uc031qon.1;uc031qoo.1;uc001wzb.4	100874185;100874185;122786	0;0;0	74972.3	superEnhancer	25038
chr1	86071797	86095712	23916	*	5	6892	74443.3	5_GES1-WT_peak_1891_lociStitched	Distal Intergenic	1	86046444	86049648	3205	1	3491	uc001dle.3	25353	ENSG00000142871	CCN1	cellular communication network factor 1	NA	NA	NA	74443.3	superEnhancer	25037
chr16	70718605	70750823	32219	*	6	8854	73514.1	6_GES1-WT_peak_16019_lociStitched	Promoter (<=1kb)	16	70695107	70719954	24848	2	92154	uc002ezj.3	0	ENSG00000132613	MTSS2	MTSS I-BAR domain containing 2	uc002ezl.3;uc002ezm.3;uc002ezn.3;uc010cfw.3;uc010cfx.1;uc002ezj.3;uc002ezk.1	55697;55697;55697;55697;55697;92154;92154	0;0;0;0;0;0;-4647	73514.1	superEnhancer	25036
chr12	63086274	63126790	40517	*	8	9443	73254.7	8_GES1-WT_peak_9901_lociStitched	Exon (uc001srk.3/57460, exon 6 of 10)	12	62997466	62997549	84	1	406891	uc001srj.2	88808	ENSG00000199179	MIRLET7I	microRNA let-7i	uc001srk.3	57460	0	73254.7	superEnhancer	25035
chr7	102504798	102533125	28328	*	5	7883	73168.4	5_GES1-WT_peak_38402_lociStitched	Exon (uc003vaq.2/222235, exon 12 of 20)	7	102553344	102585556	32213	1	10234	uc003vat.3	-20219	ENSG00000128606	LRRC17	leucine rich repeat containing 17	uc010liq.1;uc003vaq.2;uc003var.2;uc003vas.2;uc010lir.1	222235;222235;222235;222235;222235	0;0;0;0;0	73168.4	superEnhancer	25034
chr20	52421705	52447525	25821	*	3	7201	72977.9	3_GES1-WT_peak_25328_lociStitched	Distal Intergenic	20	52491040	52492248	1209	2	391257	uc010gik.4	44723	NA	SUMO1P1	SUMO1 pseudogene 1	NA	NA	NA	72977.9	superEnhancer	25033
chr12	54332641	54428098	95458	*	15	19243	72834.5	15_GES1-WT_peak_9715_lociStitched	Promoter (<=1kb)	12	54356092	54362540	6449	2	100124700	uc009zne.4	0	ENSG00000228630	HOTAIR	HOX transcript antisense RNA	uc009zne.4;uc031qhn.1;uc031qho.1;uc031qhm.1;uc001seu.3;uc001set.3;uc001sew.3;uc001ses.3;uc001sev.3;uc001ser.3;uc001seq.3;uc001sen.3;uc001sem.3;uc010soq.2;uc001sei.3;uc001seo.2;uc021qyl.1	100124700;100124700;100124700;100874366;3221;3222;3222;3223;3223;3224;3225;3226;3227;3228;3229;406973;693200	0;0;0;0;0;0;0;0;0;0;0;0;0;0;0;0;0	72834.5	superEnhancer	25032
chr12	13012348	13054537	42190	*	7	9288	72009.9	7_GES1-WT_peak_9090_lociStitched	Promoter (<=1kb)	12	13028411	13029070	660	1	387841	uc010sho.2	0	ENSG00000234498	RPL13AP20	ribosomal protein L13a pseudogene 20	uc010sho.2;uc001rba.3	387841;9052	0;0	72009.9	superEnhancer	25031
chr15	60689456	60716551	27096	*	8	8347	71858.6	8_GES1-WT_peak_14048_lociStitched	Promoter (<=1kb)	15	60639350	60690185	50836	2	302	uc002agk.3	0	ENSG00000182718	ANXA2	annexin A2	uc002agk.3;uc002agl.3;uc002agm.3;uc002agn.3;uc010uhd.2;uc010bgj.3;uc002ago.4;uc002agp.4	302;302;302;302;302;302;79664;79664	0;0;0;0;0;0;0;0	71858.6	superEnhancer	25030
chr20	30283123	30311310	28188	*	7	8969	71766.6	7_GES1-WT_peak_24800_lociStitched	Promoter (<=1kb)	20	30252261	30310133	57873	2	598	uc002wwk.3	0	ENSG00000171552	BCL2L1	BCL2 like 1	uc002wwk.3;uc002wwl.3;uc002wwm.3;uc002wwn.3	598;598;598;598	0;0;0;0	71766.6	superEnhancer	25029
chr18	55469726	55514373	44648	*	10	11029	71740.4	10_GES1-WT_peak_19096_lociStitched	Promoter (<=1kb)	18	55313659	55470327	156669	2	5205	uc002lgw.3	0	ENSG00000081923	ATP8B1	ATPase phospholipid transporting 8B1	uc002lgw.3	5205	0	71740.4	superEnhancer	25028
chr8	126556676	126569499	12824	*	2	4182	71254	2_GES1-WT_peak_40597_lociStitched	Exon (uc022baz.1/uc022baz.1, exon 1 of 1)	8	126445943	126450644	4702	1	10221	uc010mdn.3	110733	ENSG00000173334	TRIB1	tribbles pseudokinase 1	NA	NA	NA	71254	superEnhancer	25027
chr11	86429835	86454494	24660	*	7	6386	71242.7	7_GES1-WT_peak_8101_lociStitched	Distal Intergenic	11	86160931	86383678	222748	2	10873	uc010rtr.1	-46157	ENSG00000151376	ME3	malic enzyme 3	NA	NA	NA	71242.7	superEnhancer	25026
chr14	34137816	34162949	25134	*	7	7067	70641.6	7_GES1-WT_peak_12313_lociStitched	3' UTR	14	34393421	34420032	26612	2	112399	uc001wry.3	257083	ENSG00000129521	EGLN3	egl-9 family hypoxia inducible factor 3	uc001wrs.3;uc001wrt.3;uc001wru.3;uc001wrv.3;uc001wrw.3	64067;64067;64067;64067;64067	0;0;0;0;0	70641.6	superEnhancer	25025
chr12	120667262	120703550	36289	*	8	9651	70451.5	8_GES1-WT_peak_10783_lociStitched	Promoter (<=1kb)	12	120648242	120687964	39723	2	5829	uc001txx.3	0	ENSG00000089159	PXN	paxillin	uc031qjr.1;uc001txx.3;uc001txt.3;uc001txv.3;uc001txy.3;uc001txz.3	5829;5829;5829;5829;5829;5829	-2615;0;0;0;0;0	70451.5	superEnhancer	25024
chr11	118780227	118799977	19751	*	7	6024	70224.7	7_GES1-WT_peak_8579_lociStitched	Promoter (<=1kb)	11	118781417	118781496	80	1	100616376	uc021qrh.1	0	ENSG00000264211	MIR4492	microRNA 4492	uc021qrh.1;uc001pug.3;uc009zal.3	100616376;283149;283149	0;0;0	70224.7	superEnhancer	25023
chr19	43354068	43362442	8375	*	3	3679	69933.8	3_GES1-WT_peak_20365_lociStitched	Promoter (<=1kb)	19	43341149	43359870	18722	2	653492	uc010eip.3	0	NA	PSG10P	pregnancy specific beta-1-glycoprotein 10, pseudogene	uc002oug.1;uc002oun.3;uc002ouf.3;uc010eip.3	5669;5669;5671;653492	0;0;0;0	69933.8	superEnhancer	25022
chr6	140364101	140400804	36704	*	7	11424	69451.3	7_GES1-WT_peak_36278_lociStitched	Exon (uc003qis.3/uc003qis.3, exon 2 of 4)	6	140526389	140526463	75	1	100500879	uc021zgd.1	-125585	ENSG00000263514	MIR3668	microRNA 3668	NA	NA	NA	69451.3	superEnhancer	25021
chr1	39642805	39679977	37173	*	7	9277	69253.3	7_GES1-WT_peak_1147_lociStitched	Promoter (<=1kb)	1	39670423	39748740	78318	1	23499	uc010oit.1	0	ENSG00000127603	MACF1	microtubule actin crosslinking factor 1	uc001cdc.2;uc021olt.1;uc031pmc.1;uc001cda.1;uc010oit.1	23499;23499;23499;23499;23499	0;0;0;0;0	69253.3	superEnhancer	25020
chr1	223887736	223919713	31978	*	8	9840	69053.3	8_GES1-WT_peak_4012_lociStitched	Promoter (<=1kb)	1	223889295	223963720	74426	1	824	uc010puy.2	0	ENSG00000162909	CAPN2	calpain 2	uc010puy.2;uc001hob.4	824;824	0;0	69053.3	superEnhancer	25019
chr1	151945073	151967237	22165	*	9	5528	68452.2	9_GES1-WT_peak_2776_lociStitched	Promoter (<=1kb)	1	151955386	151966714	11329	2	6281	uc001ezl.3	0	ENSG00000197747	S100A10	S100 calcium binding protein A10	uc001ezl.3	6281	0	68452.2	superEnhancer	25018
chr8	23145663	23214605	68943	*	13	11508	68322.5	13_GES1-WT_peak_39432_lociStitched	Promoter (<=1kb)	8	23193721	23223638	29918	1	100507156	uc003xdj.3	0	ENSG00000253837	LOC100507156	uncharacterized LOC100507156	uc003xdj.3;uc003xdf.3;uc011kzt.2;uc010lty.1;uc003xdh.1	100507156;203069;203069;4017;4017	0;0;0;0;0	68322.5	superEnhancer	25017
chr5	39497868	39520897	23030	*	6	6562	66973.5	6_GES1-WT_peak_32051_lociStitched	Distal Intergenic	5	39371776	39425335	53560	2	1601	uc003jlx.3	-72533	ENSG00000153071	DAB2	DAB adaptor protein 2	NA	NA	NA	66973.5	superEnhancer	25016
chr6	30709688	30750944	41257	*	7	10194	66791	7_GES1-WT_peak_34837_lociStitched	Promoter (<=1kb)	6	30695511	30710453	14943	2	10211	uc003nrm.3	0	ENSG00000137312	FLOT1	flotillin 1	uc003nrm.3;uc011dmr.2;uc003nrn.3	10211;10211;8870	0;0;0	66791	superEnhancer	25015
chr16	86957709	86986902	29194	*	8	9009	66647	8_GES1-WT_peak_16311_lociStitched	Distal Intergenic	16	86612115	86615304	3190	1	2300	uc002fjr.3	345594	ENSG00000176678	FOXL1	forkhead box L1	NA	NA	NA	66647	superEnhancer	25014
chr1	98462846	98497204	34359	*	6	8807	66402.2	6_GES1-WT_peak_2132_lociStitched	Intron (uc001drx.2/400765, intron 3 of 4)	1	98510799	98510907	109	2	100616452	uc021oqj.1	13703	ENSG00000284247	MIR2682	microRNA 2682	uc001drx.2	400765	0	66402.2	superEnhancer	25013
chr19	43768098	43800379	32282	*	5	5580	66333.1	5_GES1-WT_peak_20414_lociStitched	Promoter (<=1kb)	19	43757435	43773682	16248	2	5678	uc002owd.4	0	ENSG00000183668	PSG9	pregnancy specific beta-1-glycoprotein 9	uc002owd.4;uc002owe.4;uc002owf.4;uc010xwm.2;uc002owg.2	5678;5678;5678;5678;5678	0;0;0;0;0	66333.1	superEnhancer	25012
chr14	80048185	80064477	16293	*	6	5966	66206.6	6_GES1-WT_peak_13116_lociStitched	Intron (uc001xum.2/9369, intron 15 of 20)	14	79745682	80334633	588952	1	9369	uc010asw.4	302503	ENSG00000021645	NRXN3	neurexin 3	uc001xum.2;uc001xun.4;uc001xup.3;uc001xuq.3;uc001xur.5;uc010asw.4	9369;9369;9369;9369;9369;9369	0;0;0;0;0;0	66206.6	superEnhancer	25011
chr2	33141159	33141801	643	*	1	644	66151.9	1_GES1-WT_peak_21351_lociStitched	Intron (uc002roo.2/285045, intron 4 of 5)	2	33152194	33171202	19009	1	100271832	uc002ror.3	-10393	NA	NA	NA	uc002roo.2;uc002rop.1;uc002roq.2;uc010ymy.1	285045;285045;285045;285045	0;0;0;0	66151.9	superEnhancer	25010
chr1	149802871	149834161	31291	*	8	9835	66042.8	8_GES1-WT_peak_2678_lociStitched	Promoter (<=1kb)	1	149824181	149824687	507	1	126961	uc001esy.3	0	ENSG00000203811	H3C14	H3 clustered histone 14	uc001esy.3;uc001esv.3;uc021oxz.1;uc001esx.3;uc001esw.3;uc001ess.3;uc001etb.3	126961;126961;337873;723790;723790;8370;8370	0;0;0;0;0;0;0	66042.8	superEnhancer	25009
chr8	128980786	128983106	2321	*	1	2322	65472.9	1_GES1-WT_peak_40659_lociStitched	Intron (uc003ysl.3/5820, intron 2 of 7)	8	128972879	128972941	63	1	100302161	uc022bbg.1	7907	ENSG00000221771	MIR1205	microRNA 1205	uc003ysl.3	5820	0	65472.9	superEnhancer	25008
chr1	43937441	43942561	5121	*	3	4481	64993.2	3_GES1-WT_peak_1276_lociStitched	Distal Intergenic	1	43916674	43919660	2987	2	81888	uc021omq.1	-17781	ENSG00000178922	HYI	hydroxypyruvate isomerase (putative)	NA	NA	NA	64993.2	superEnhancer	25007
chr3	120187961	120192819	4859	*	2	4468	64991.1	2_GES1-WT_peak_28420_lociStitched	Distal Intergenic	3	120128804	120169918	41115	2	11167	uc010hrb.2	-18043	ENSG00000163430	FSTL1	follistatin like 1	NA	NA	NA	64991.1	superEnhancer	25006
chr17	42611104	42635665	24562	*	5	7282	64833.9	5_GES1-WT_peak_17404_lociStitched	Promoter (<=1kb)	17	42634812	42638630	3819	1	2535	uc002igx.2	0	ENSG00000180340	FZD2	frizzled class receptor 2	uc002igx.2	2535	0	64833.9	superEnhancer	25005
chr5	65156420	65182872	26453	*	6	8037	64730.5	6_GES1-WT_peak_32409_lociStitched	Distal Intergenic	5	65222382	65376851	154470	1	55914	uc003jui.2	-39510	ENSG00000112851	ERBIN	erbb2 interacting protein	NA	NA	NA	64730.5	superEnhancer	25004
chr8	145010267	145031783	21517	*	9	7046	64456.3	9_GES1-WT_peak_40865_lociStitched	Promoter (<=1kb)	8	144989321	145013758	24438	2	5339	uc003zab.1	0	ENSG00000178209	PLEC	plectin	uc003zab.1;uc003zac.1;uc003zad.2;uc003zae.1;uc003zaf.1;uc003zag.1;uc003zah.2;uc003zaj.2;uc022bcl.1	5339;5339;5339;5339;5339;5339;5339;5339;724031	0;0;0;0;0;0;0;0;0	64456.3	superEnhancer	25003
chr3	115503075	115524282	21208	*	5	6950	64086.3	5_GES1-WT_peak_28377_lociStitched	3' UTR	3	115342151	115440334	98184	1	2596	uc003ebr.2	160924	ENSG00000172020	GAP43	growth associated protein 43	uc003ebs.3;uc011bis.2	4045;4045	0;0	64086.3	superEnhancer	25002
chr6	117760950	117771171	10222	*	4	4797	63993.8	4_GES1-WT_peak_35979_lociStitched	Intron (uc003pxq.1/57120, intron 4 of 6)	6	117609530	117747018	137489	2	6098	uc011ebi.1	-13932	ENSG00000047936	ROS1	ROS proto-oncogene 1, receptor tyrosine kinase	uc003pxq.1	57120	0	63993.8	superEnhancer	25001
chr1	156066140	156100104	33965	*	7	7755	63847.4	7_GES1-WT_peak_2897_lociStitched	Promoter (<=1kb)	1	156084461	156108548	24088	1	4000	uc001fng.2	0	ENSG00000160789	LMNA	lamin A/C	uc001fnf.1;uc001fng.2;uc001fnh.3;uc001fni.3;uc009wro.2;uc001fnj.3;uc010pgz.2;uc001fnk.3;uc009wrp.3	4000;4000;4000;4000;4000;4000;4000;4000;4000	0;0;0;0;0;0;0;0;-4800	63847.4	superEnhancer	25000
chr6	79297298	79329879	32582	*	5	7305	63381.8	5_GES1-WT_peak_35571_lociStitched	Distal Intergenic	6	79577261	79608135	30875	1	134728	uc003pim.4	-247382	ENSG00000146243	IRAK1BP1	interleukin 1 receptor associated kinase 1 binding protein 1	NA	NA	NA	63381.8	superEnhancer	24999
chr1	59579378	59617916	38539	*	7	7314	62934.2	7_GES1-WT_peak_1525_lociStitched	Promoter (<=1kb)	1	59597608	59612479	14872	2	729467	uc010ooq.2	0	ENSG00000224609	HSD52	uncharacterized LOC729467	uc010ooq.2	729467	0	62934.2	superEnhancer	24998
chr3	171562356	171595730	33375	*	8	7000	62631.5	8_GES1-WT_peak_29219_lociStitched	Promoter (1-2kb)	3	171561139	171577108	15970	1	389177	uc003fhw.2	1217	ENSG00000186329	TMEM212	transmembrane protein 212	uc003fhw.2	389177	0	62631.5	superEnhancer	24997
chr22	30016725	30029988	13264	*	3	3591	62571.6	3_GES1-WT_peak_26446_lociStitched	5' UTR	22	29999545	30094589	95045	1	4771	uc003agj.4	17180	ENSG00000186575	NF2	neurofibromin 2	uc003afy.4;uc003afz.4;uc003aga.4;uc003agb.4;uc003agc.4;uc003agd.4;uc003age.4;uc003agf.4;uc003agg.4;uc003agh.4;uc003agi.4;uc003agj.4	4771;4771;4771;4771;4771;4771;4771;4771;4771;4771;4771;4771	0;0;0;0;0;0;0;0;0;0;0;0	62571.6	superEnhancer	24996
chr21	30534712	30605709	70998	*	12	13461	62378.8	12_GES1-WT_peak_25721_lociStitched	Promoter (<=1kb)	21	30565801	30660526	94726	1	193629	uc002ynh.3	0	ENSG00000215533	LINC00189	long intergenic non-protein coding RNA 189	uc002ynh.3;uc002yni.3;uc002ynd.3;uc002yne.3;uc010gln.3;uc011acr.2;uc002ynf.3;uc010glo.3;uc002yng.3;uc010glp.3	193629;193629;56911;56911;56911;56911;56911;56911;56911;56911	0;0;0;0;0;0;0;0;0;0	62378.8	superEnhancer	24995
chr18	3247502	3278162	30661	*	7	7055	62373.7	7_GES1-WT_peak_18389_lociStitched	Promoter (<=1kb)	18	3262111	3278282	16172	1	103910	uc002klt.4	0	ENSG00000118680	MYL12B	myosin light chain 12B	uc002klt.4;uc010dkl.3;uc010wyv.2;uc002klr.3;uc002kls.3	103910;103910;103910;10627;10627	0;0;0;0;0	62373.7	superEnhancer	24994
chr2	37993481	38031042	37562	*	11	9099	62300.3	11_GES1-WT_peak_21439_lociStitched	Distal Intergenic	2	37869025	37899678	30654	2	10602	uc031roa.1	-93803	ENSG00000163171	CDC42EP3	CDC42 effector protein 3	NA	NA	NA	62300.3	superEnhancer	24993
chr11	122007137	122035793	28657	*	10	7959	62288.9	10_GES1-WT_peak_8675_lociStitched	Promoter (<=1kb)	11	122017230	122017301	72	2	406882	uc001pyg.3	0	ENSG00000198975	MIRLET7A2	microRNA let-7a-2	uc009zba.2;uc001pyg.3;uc001pyh.1	399959;406882;406892	0;0;0	62288.9	superEnhancer	24992
chr3	112358916	112374116	15201	*	3	5622	62207.1	3_GES1-WT_peak_28315_lociStitched	Promoter (<=1kb)	3	112323409	112359977	36569	2	151887	uc003dzf.3	0	ENSG00000091986	CCDC80	coiled-coil domain containing 80	uc011bhv.2;uc003dzf.3;uc003dzg.3;uc003dzh.1	151887;151887;151887;151887	0;0;0;0	62207.1	superEnhancer	24991
chr11	122049741	122073706	23966	*	5	7207	62064.8	5_GES1-WT_peak_8679_lociStitched	Promoter (<=1kb)	11	121959811	122073770	113960	2	399959	uc009zba.2	64	ENSG00000255248	MIR100HG	mir-100-let-7a-2-mir-125b-1 cluster host gene	uc009zba.2;uc009zbb.1	399959;399959	0;0	62064.8	superEnhancer	24990
chr12	12869135	12888253	19119	*	5	6019	61840.4	5_GES1-WT_peak_9068_lociStitched	Promoter (<=1kb)	12	12870302	12875305	5004	1	1027	uc001rat.2	0	ENSG00000111276	CDKN1B	cyclin dependent kinase inhibitor 1B	uc001rat.2;uc001rav.3;uc001rau.4	1027;51202;81575	0;0;0	61840.4	superEnhancer	24989
chr2	75815490	75848664	33175	*	5	7183	61805	5_GES1-WT_peak_22097_lociStitched	Distal Intergenic	2	75719444	75796848	77405	2	84141	uc002snk.1	-18642	ENSG00000115363	EVA1A	eva-1 homolog A, regulator of programmed cell death	NA	NA	NA	61805	superEnhancer	24988
chr13	97874646	97911700	37055	*	6	7810	61707.7	6_GES1-WT_peak_11824_lociStitched	Promoter (<=1kb)	13	97874550	98046374	171825	1	10150	uc010aft.4	96	ENSG00000139793	MBNL2	muscleblind like splicing regulator 2	uc031qmz.1;uc001vmz.4;uc001vna.4;uc001vnb.4;uc010aft.4	10150;10150;10150;10150;10150	0;0;0;0;0	61707.7	superEnhancer	24987
chr9	112777904	112814159	36256	*	8	8950	61515.6	8_GES1-WT_peak_42195_lociStitched	Promoter (<=1kb)	9	112810878	112934791	123914	1	11217	uc004bem.3	0	NA	NA	NA	uc004bem.3;uc011lwi.2;uc004bei.2;uc004bej.4;uc004bek.4;uc004bel.1	11217;11217;445815;445815;445815;445815	0;0;0;0;0;0	61515.6	superEnhancer	24986
chr2	227339723	227355438	15716	*	5	7027	61492	5_GES1-WT_peak_24056_lociStitched	Distal Intergenic	2	227523426	227523509	84	2	100847053	uc031rrm.1	168071	ENSG00000263363	MIR5702	microRNA 5702	NA	NA	NA	61492	superEnhancer	24985
chr7	55120169	55155225	35057	*	5	7922	61388.3	5_GES1-WT_peak_37712_lociStitched	Intron (uc003tqh.3/1956, intron 1 of 9)	7	55177540	55275031	97492	1	1956	uc011kco.2	-22315	ENSG00000146648	EGFR	epidermal growth factor receptor	uc003tqh.3;uc003tqi.3;uc003tqj.3;uc010kzg.2;uc022adm.1;uc003tqk.3;uc022adn.1	1956;1956;1956;1956;1956;1956;1956	0;0;0;0;0;0;0	61388.3	superEnhancer	24984
chr3	99742566	99767218	24653	*	6	7085	61287.4	6_GES1-WT_peak_28106_lociStitched	Exon (uc003dtk.2/84319, exon 4 of 5)	3	99273153	99717059	443907	2	100313938	uc021xbq.1	-25507	ENSG00000221369	MIR548G	microRNA 548g	uc003dtm.3;uc003dto.3;uc003dtk.2;uc003dtl.3	11259;11259;84319;84319	0;0;0;0	61287.4	superEnhancer	24983
chr1	244254692	244278104	23413	*	3	7157	61033	3_GES1-WT_peak_4423_lociStitched	Distal Intergenic	1	244216507	244220780	4274	1	10472	uc001iae.4	38185	ENSG00000179456	ZBTB18	zinc finger and BTB domain containing 18	NA	NA	NA	61033	superEnhancer	24982
chr19	41725180	41732911	7732	*	4	5133	60927.4	4_GES1-WT_peak_20306_lociStitched	Promoter (<=1kb)	19	41725108	41767671	42564	1	558	uc010ehk.3	72	ENSG00000167601	AXL	AXL receptor tyrosine kinase	uc010ehi.1;uc010ehj.3;uc010ehk.3	558;558;558	0;0;0	60927.4	superEnhancer	24981
chr19	43524687	43535879	11193	*	2	4129	60792.5	2_GES1-WT_peak_20383_lociStitched	Promoter (<=1kb)	19	43511809	43530631	18823	2	5680	uc002ovm.1	0	ENSG00000243130	PSG11	pregnancy specific beta-1-glycoprotein 11	uc010xwk.2;uc002ovm.1;uc002ovo.1;uc002ovp.1	5675;5680;5680;5680	0;0;0;0	60792.5	superEnhancer	24980
chr5	95022269	95068173	45905	*	7	8424	60727.7	7_GES1-WT_peak_32816_lociStitched	Promoter (<=1kb)	5	95053337	95091797	38461	1	22836	uc003klk.1	0	ENSG00000164292	RHOBTB3	Rho related BTB domain containing 3	uc003klk.1;uc003kll.3;uc003klm.3;uc010jbh.1;uc003klh.1;uc003kli.1;uc003klj.1	22836;22836;22836;83890;83890;83890;83890	0;0;0;0;0;0;0	60727.7	superEnhancer	24979
chr7	92369639	92396893	27255	*	3	7244	60574.2	3_GES1-WT_peak_38181_lociStitched	Intron (uc011khw.2/1021, intron 3 of 7)	7	92234235	92463231	228997	2	1021	uc011khw.2	66338	ENSG00000105810	CDK6	cyclin dependent kinase 6	uc011khw.2;uc010lez.3	1021;1021	0;0	60574.2	superEnhancer	24978
chr10	33526112	33563319	37208	*	7	8712	60559.7	7_GES1-WT_peak_5120_lociStitched	5' UTR	10	33466419	33623768	157350	2	8829	uc001iwv.4	60449	ENSG00000099250	NRP1	neuropilin 1	uc001iwv.4;uc001iww.4;uc001iwx.4;uc001iwy.4;uc009xlz.3;uc001iwz.2;uc001ixa.2;uc001ixb.2;uc001ixc.1	8829;8829;8829;8829;8829;8829;8829;8829;8829	0;0;0;0;0;0;0;0;0	60559.7	superEnhancer	24977
chr2	235860020	235906436	46417	*	9	9237	60305	9_GES1-WT_peak_24217_lociStitched	Promoter (<=1kb)	2	235860628	235964358	103731	1	23677	uc002vvp.3	0	ENSG00000130147	SH3BP4	SH3 domain binding protein 4	uc002vvp.3;uc010fym.3;uc002vvq.3	23677;23677;23677	0;0;0	60305	superEnhancer	24976
chr1	23880589	23919784	39196	*	9	7154	60295.2	9_GES1-WT_peak_722_lociStitched	Promoter (<=1kb)	1	23907985	23967056	59072	1	259283	uc001bhi.3	0	ENSG00000197880	MDS2	myelodysplastic syndrome 2 translocation associated	uc001bhi.3;uc001bhh.4	259283;3399	0;0	60295.2	superEnhancer	24975
chr10	63984134	64004804	20671	*	6	6642	59919	6_GES1-WT_peak_5499_lociStitched	Promoter (<=1kb)	10	63942794	63996022	53229	2	219790	uc009xpf.1	0	ENSG00000182010	RTKN2	rhotekin 2	uc009xpf.1;uc001jlw.3;uc001jlx.2	219790;219790;219790	0;0;0	59919	superEnhancer	24974
chr15	96868551	96884232	15682	*	4	5234	59795.5	4_GES1-WT_peak_14858_lociStitched	Promoter (<=1kb)	15	96876490	96876536	47	1	100302258	uc021swi.1	0	ENSG00000283888	MIR1469	microRNA 1469	uc021swi.1;uc031qud.1;uc002bto.2;uc031que.1;uc002btp.3;uc010uri.2;uc010urj.2;uc010urk.2	100302258;644192;644192;644192;7026;7026;7026;7026	0;0;0;0;0;0;0;0	59795.5	superEnhancer	24973
chr11	62307116	62342414	35299	*	8	7779	59785.9	8_GES1-WT_peak_7556_lociStitched	Promoter (<=1kb)	11	62327073	62341460	14388	2	1937	uc001ntm.1	0	ENSG00000254772	EEF1G	eukaryotic translation elongation factor 1 gamma	uc001ntm.1;uc010rlw.1;uc001nto.2;uc001ntk.2;uc001ntl.3	1937;1937;64852;79026;79026	0;0;0;0;0	59785.9	superEnhancer	24972
chr8	131271496	131287455	15960	*	4	3278	59733.5	4_GES1-WT_peak_40716_lociStitched	Intron (uc003yta.2/50807, intron 3 of 29)	8	131307601	131308779	1179	2	29065	uc003ytc.2	21324	NA	ASAP1-IT1	ASAP1 intronic transcript 1	uc003yta.2;uc011liw.2	50807;50807	0;0	59733.5	superEnhancer	24971
chr9	22083583	22118502	34920	*	6	7401	59598	6_GES1-WT_peak_41158_lociStitched	Promoter (<=1kb)	9	22113665	22121093	7429	1	100048912	uc010miz.3	0	ENSG00000240498	CDKN2B-AS1	CDKN2B antisense RNA 1	uc003zpm.3;uc022beg.1;uc022beh.1;uc022bei.1;uc022bej.1;uc022bek.1;uc022bel.1;uc022bem.1;uc022ben.1;uc010miz.3	100048912;100048912;100048912;100048912;100048912;100048912;100048912;100048912;100048912;100048912	0;0;0;0;0;0;0;0;0;0	59598	superEnhancer	24970
chr4	79472483	79491464	18982	*	3	6170	59464.9	3_GES1-WT_peak_30423_lociStitched	Promoter (<=1kb)	4	79472742	79531605	58864	1	306	uc003hld.3	0	ENSG00000138772	ANXA3	annexin A3	uc003hld.3	306	0	59464.9	superEnhancer	24969
chr3	98673497	98705734	32238	*	8	9090	59453.3	8_GES1-WT_peak_28058_lociStitched	Distal Intergenic	3	98568232	98620533	52302	2	131566	uc003dtf.1	-52964	ENSG00000057019	DCBLD2	discoidin, CUB and LCCL domain containing 2	NA	NA	NA	59453.3	superEnhancer	24968
chr2	28015156	28033813	18658	*	4	5527	59047	4_GES1-WT_peak_21244_lociStitched	3' UTR	2	27994584	28002608	8025	1	9553	uc002rln.1	20572	ENSG00000243147	MRPL33	mitochondrial ribosomal protein L33	uc002rlo.1;uc010ezi.2;uc010ymg.2	64080;64080;64080	0;0;0	59047	superEnhancer	24967
chr12	63228494	63269784	41291	*	6	8298	58975.9	6_GES1-WT_peak_9909_lociStitched	Intron (uc001srk.3/57460, intron 1 of 9)	12	63037763	63328665	290903	2	57460	uc001srk.3	58881	ENSG00000111110	PPM1H	protein phosphatase, Mg2+/Mn2+ dependent 1H	uc001srk.3	57460	0	58975.9	superEnhancer	24966
chr10	75633798	75677044	43247	*	8	8991	58958.6	8_GES1-WT_peak_5706_lociStitched	Promoter (<=1kb)	10	75670862	75677258	6397	1	5328	uc001jwa.3	0	ENSG00000122861	PLAU	plasminogen activator, urokinase	uc001jvz.2;uc001jwa.3;uc010qkw.2;uc010qkx.2;uc001jwb.3;uc001jwc.3;uc009xrq.1;uc001jvm.2;uc001jvo.2;uc001jvp.2;uc001jvq.2;uc001jvr.2;uc001jvs.2;uc001jvt.2;uc001jvv.2;uc010qkv.2	414236;5328;5328;5328;5328;5328;5328;818;818;818;818;818;818;818;818;818	0;0;0;0;0;0;0;0;0;0;0;0;0;0;0;0	58958.6	superEnhancer	24965
chr2	190787944	190800556	12613	*	3	3215	58602.5	3_GES1-WT_peak_23435_lociStitched	Distal Intergenic	2	190718655	190728841	10187	1	5378	uc002urn.1	69289	ENSG00000064933	PMS1	PMS1 homolog 1, mismatch repair system component	NA	NA	NA	58602.5	superEnhancer	24964
chr11	114151709	114178750	27042	*	7	5839	58481	7_GES1-WT_peak_8497_lociStitched	Promoter (<=1kb)	11	114166535	114183238	16704	1	4837	uc001pos.1	0	ENSG00000166741	NNMT	nicotinamide N-methyltransferase	uc001por.1;uc001pos.1	4837;4837	0;0	58481	superEnhancer	24963
chr7	46154896	46186896	32001	*	6	5599	58187.4	6_GES1-WT_peak_37585_lociStitched	Distal Intergenic	7	45951844	45960871	9028	2	3486	uc003tnt.3	-194025	ENSG00000146674	IGFBP3	insulin like growth factor binding protein 3	NA	NA	NA	58187.4	superEnhancer	24962
chr11	28844175	28870646	26472	*	6	4621	58108.7	6_GES1-WT_peak_7194_lociStitched	Distal Intergenic	11	28131713	28147409	15697	1	196074	uc001msf.1	712462	ENSG00000169519	METTL15	methyltransferase like 15	NA	NA	NA	58108.7	superEnhancer	24961
chr20	19955507	19975235	19729	*	4	7236	58064.4	4_GES1-WT_peak_24697_lociStitched	Exon (uc002wro.2/54453, exon 8 of 12)	20	19997934	20014273	16340	1	51126	uc002wrp.3	-22699	ENSG00000173418	NAA20	N-alpha-acetyltransferase 20, NatB catalytic subunit	uc002wro.2;uc010gcu.2;uc010gcv.2	54453;54453;54453	0;0;0	58064.4	superEnhancer	24960
chr5	55554385	55576832	22448	*	4	5277	58030.3	4_GES1-WT_peak_32237_lociStitched	Exon (uc021xys.1/uc021xys.1, exon 1 of 1)	5	55395507	55529186	133680	2	79722	uc003jqu.3	-25199	ENSG00000164512	ANKRD55	ankyrin repeat domain 55	NA	NA	NA	58030.3	superEnhancer	24959
chr17	75118232	75141947	23716	*	9	5897	57909.7	9_GES1-WT_peak_18112_lociStitched	Promoter (<=1kb)	17	75137005	75213181	76177	1	6397	uc002jtm.3	0	ENSG00000129657	SEC14L1	SEC14 like lipid binding 1	uc021udv.1;uc021udw.1;uc021udx.1;uc002jtm.3;uc002jto.3;uc010dhc.3;uc010wth.2	6397;6397;6397;6397;6397;6397;6397	0;0;0;0;0;0;0	57909.7	superEnhancer	24958
chr14	68591338	68614887	23550	*	7	6672	57808.2	7_GES1-WT_peak_12861_lociStitched	Intron (uc001xkd.3/5890, intron 7 of 10)	14	68286496	69196935	910440	1	5890	uc001xkg.2	304842	ENSG00000182185	RAD51B	RAD51 paralog B	uc001xkd.3;uc010aqr.3;uc001xke.3;uc001xkf.2;uc001xkg.2	5890;5890;5890;5890;5890	0;0;0;0;0	57808.2	superEnhancer	24957
chr2	56893898	56915709	21812	*	4	5454	57736.4	4_GES1-WT_peak_21801_lociStitched	Distal Intergenic	2	56411258	56613309	202052	1	114800	uc002rzn.3	482640	ENSG00000055813	CCDC85A	coiled-coil domain containing 85A	NA	NA	NA	57736.4	superEnhancer	24956
chr22	30623848	30649221	25374	*	6	6903	57487.3	6_GES1-WT_peak_26474_lociStitched	Promoter (<=1kb)	22	30636436	30642840	6405	2	3976	uc003agz.3	0	ENSG00000128342	LIF	LIF interleukin 6 family cytokine	uc003agz.3;uc011aks.2	3976;3976	0;0	57487.3	superEnhancer	24955
chr7	79124290	79159953	35664	*	4	7672	57401.2	4_GES1-WT_peak_38028_lociStitched	Distal Intergenic	7	79083276	79100524	17249	1	100505881	uc022ags.1	41014	ENSG00000234456	MAGI2-AS3	MAGI2 antisense RNA 3	NA	NA	NA	57401.2	superEnhancer	24954
chr12	50579557	50616420	36864	*	5	9202	57142.9	5_GES1-WT_peak_9569_lociStitched	Promoter (<=1kb)	12	50569563	50595316	25754	2	51474	uc001rwg.4	0	ENSG00000050405	LIMA1	LIM domain and actin binding 1	uc001rwg.4;uc001rwh.4;uc001rwi.4;uc001rwj.4;uc001rwk.4;uc010smr.2;uc010sms.2	51474;51474;51474;51474;51474;51474;51474	0;0;0;0;0;0;0	57142.9	superEnhancer	24953
chr5	57480254	57498445	18192	*	5	4999	56851.8	5_GES1-WT_peak_32298_lociStitched	Distal Intergenic	5	57753916	57755189	1274	2	10769	uc011cql.1	256744	ENSG00000145632	PLK2	polo like kinase 2	NA	NA	NA	56851.8	superEnhancer	24952
chr6	141166672	141180730	14059	*	3	5409	56785.7	3_GES1-WT_peak_36305_lociStitched	Distal Intergenic	6	141004951	141005020	70	1	100616180	uc021zge.1	161721	ENSG00000264390	MIR4465	microRNA 4465	NA	NA	NA	56785.7	superEnhancer	24951
chr3	134075993	134093725	17733	*	4	4857	56711.9	4_GES1-WT_peak_28693_lociStitched	Promoter (<=1kb)	3	134074190	134085683	11494	2	51421	uc003eqe.1	0	ENSG00000114019	AMOTL2	angiomotin like 2	uc003eqe.1;uc003eqg.1;uc003eqh.1;uc003eqf.2	51421;51421;51421;51421	0;0;0;0	56711.9	superEnhancer	24950
chr19	43435350	43439307	3958	*	2	3434	56681.7	2_GES1-WT_peak_20375_lociStitched	Promoter (<=1kb)	19	43225794	43440226	214433	2	5671	uc002ouf.3	919	ENSG00000221826	PSG3	pregnancy specific beta-1-glycoprotein 3	uc002ouf.3;uc010xwk.2;uc010xwl.2;uc031rlb.1	5671;5675;5676;5676	0;0;0;0	56681.7	superEnhancer	24949
chr6	55780313	55791209	10897	*	4	5335	56517.3	4_GES1-WT_peak_35394_lociStitched	Distal Intergenic	6	55620238	55740375	120138	2	653	uc011dxf.2	-39938	ENSG00000112175	BMP5	bone morphogenetic protein 5	NA	NA	NA	56517.3	superEnhancer	24948
chr7	32200445	32204204	3760	*	3	3071	56456.8	3_GES1-WT_peak_37342_lociStitched	Intron (uc003tco.2/5137, intron 3 of 18)	7	31829247	32111045	281799	2	5137	uc003tcs.3	-89400	ENSG00000154678	PDE1C	phosphodiesterase 1C	uc003tco.2	5137	0	56456.8	superEnhancer	24947
chr5	149517587	149535947	18361	*	4	6643	56399.5	4_GES1-WT_peak_33632_lociStitched	Promoter (<=1kb)	5	149493402	149535422	42021	2	5159	uc003lro.3	0	ENSG00000113721	PDGFRB	platelet derived growth factor receptor beta	uc003lro.3;uc010jhd.3;uc011dcg.1	5159;5159;5159	0;0;-971	56399.5	superEnhancer	24946
chr1	230203010	230270587	67578	*	8	10108	56366.8	8_GES1-WT_peak_4149_lociStitched	Promoter (<=1kb)	1	230202956	230417875	214920	1	2590	uc010pwa.1	54	ENSG00000143641	GALNT2	polypeptide N-acetylgalactosaminyltransferase 2	uc010pvy.1;uc010pvz.1;uc010pwa.1	2590;2590;2590	0;0;0	56366.8	superEnhancer	24945
chr1	94788694	94800394	11701	*	4	4431	56242	4_GES1-WT_peak_2048_lociStitched	Distal Intergenic	1	94615403	94740624	125222	2	9411	uc009wdq.1	-48070	ENSG00000137962	ARHGAP29	Rho GTPase activating protein 29	NA	NA	NA	56242	superEnhancer	24944
chr5	55903186	55934173	30988	*	6	7179	56004.6	6_GES1-WT_peak_32254_lociStitched	Distal Intergenic	5	56110900	56191978	81079	1	4214	uc003jqw.4	-176727	ENSG00000095015	MAP3K1	mitogen-activated protein kinase kinase kinase 1	NA	NA	NA	56004.6	superEnhancer	24943
chr7	83152651	83162312	9662	*	3	3938	55903.4	3_GES1-WT_peak_38099_lociStitched	Intron (uc022agy.1/9723, intron 1 of 16)	7	82993222	83270747	277526	2	9723	uc022agy.1	108435	ENSG00000170381	SEMA3E	semaphorin 3E	uc022agy.1;uc003uhy.2	9723;9723	0;0	55903.4	superEnhancer	24942
chr3	106926143	106960145	34003	*	5	7345	55744.5	5_GES1-WT_peak_28224_lociStitched	Promoter (<=1kb)	3	106555658	106959485	403828	2	100302640	uc003dwf.4	0	NA	LINC00882	long intergenic non-protein coding RNA 882	uc003dwf.4;uc011bhk.2;uc003dwg.4;uc010hpq.3	100302640;100302640;344595;344595	0;0;0;0	55744.5	superEnhancer	24941
chr7	116327596	116357556	29961	*	6	6888	55697.5	6_GES1-WT_peak_38578_lociStitched	Promoter (<=1kb)	7	116339125	116364901	25777	1	4233	uc011kmz.1	0	ENSG00000105976	MET	MET proto-oncogene, receptor tyrosine kinase	uc003vii.1;uc010lkg.3;uc022akk.1;uc003vij.3;uc010lkh.3;uc011kmz.1;uc011kna.1;uc011knb.1;uc011knc.1;uc011knd.2;uc011kne.2;uc011knf.2;uc011kng.1;uc011knh.1;uc011kni.2	4233;4233;4233;4233;4233;4233;4233;4233;4233;4233;4233;4233;4233;4233;4233	0;0;0;0;0;0;0;0;0;0;0;0;0;0;0	55697.5	superEnhancer	24940
chr15	67357123	67402642	45520	*	11	8465	55479.8	11_GES1-WT_peak_14217_lociStitched	Promoter (<=1kb)	15	67358195	67487533	129339	1	4088	uc002aqj.3	0	ENSG00000166949	SMAD3	SMAD family member 3	uc002aqj.3	4088	0	55479.8	superEnhancer	24939
chr3	197182925	197218075	35151	*	5	8073	55419.1	5_GES1-WT_peak_29644_lociStitched	Distal Intergenic	3	197236654	197282858	46205	2	622	uc003fxr.3	64783	ENSG00000161267	BDH1	3-hydroxybutyrate dehydrogenase 1	NA	NA	NA	55419.1	superEnhancer	24938
chr10	15241789	15254396	12608	*	3	4053	55171.3	3_GES1-WT_peak_4772_lociStitched	3' UTR	10	15147771	15210695	62925	2	9397	uc001ioa.1	-31094	ENSG00000152465	NMT2	N-myristoyltransferase 2	uc001iob.3	221061	0	55171.3	superEnhancer	24937
chr10	28505630	28509489	3860	*	3	3162	55098.8	3_GES1-WT_peak_4985_lociStitched	Intron (uc009xkz.1/143098, intron 1 of 15)	10	28339923	28527664	187742	2	143098	uc009xkz.1	18175	ENSG00000150054	MPP7	membrane palmitoylated protein 7	uc009xkz.1;uc001iua.1;uc001iub.1;uc009xla.2;uc010qdv.1	143098;143098;143098;143098;143098	0;0;0;0;0	55098.8	superEnhancer	24936
chr3	15671911	15689906	17996	*	6	6369	54974.2	6_GES1-WT_peak_27168_lociStitched	5' UTR	3	15708744	15717730	8987	2	23243	uc011avy.1	27824	ENSG00000206560	ANKRD28	ankyrin repeat domain 28	uc011avv.2;uc003cah.3;uc011avw.2;uc011avx.2	686;686;686;686	0;0;0;0	54974.2	superEnhancer	24935
chr16	85018441	85045725	27285	*	4	7210	54774.6	4_GES1-WT_peak_16247_lociStitched	Promoter (<=1kb)	16	85008067	85045141	37075	2	55625	uc002fiq.2	0	ENSG00000153786	ZDHHC7	zinc finger DHHC-type palmitoyltransferase 7	uc002fiq.2;uc010voi.1;uc002fir.1	55625;55625;55625	0;0;0	54774.6	superEnhancer	24934
chr1	85779040	85810634	31595	*	6	9251	54722.5	6_GES1-WT_peak_1865_lociStitched	3' UTR	1	85731460	85742587	11128	2	8915	uc021opd.1	-36453	ENSG00000142867	BCL10	BCL10 immune signaling adaptor	uc010osb.2;uc009wco.3;uc001dlb.3;uc001dlc.3;uc001dla.2	23576;23576;23576;23576;646626	0;0;0;0;0	54722.5	superEnhancer	24933
chr12	47473247	47491155	17909	*	6	5784	54665.4	6_GES1-WT_peak_9488_lociStitched	Promoter (<=1kb)	12	47469490	47473734	4245	2	347902	uc001rpk.3	0	ENSG00000139211	AMIGO2	adhesion molecule with Ig like domain 2	uc001rpk.3;uc001rpl.3;uc001rpm.3;uc001rpn.3	347902;347902;347902;91523	0;0;0;0	54665.4	superEnhancer	24932
chr10	54068177	54080005	11829	*	5	4625	54663	5_GES1-WT_peak_5361_lociStitched	Promoter (<=1kb)	10	54056608	54073888	17281	2	100506939	uc009xox.2	0	NA	PRKG1-AS1	PRKG1 antisense RNA 1	uc009xox.2;uc001jjr.3	100506939;22943	0;0	54663	superEnhancer	24931
chr19	1241748	1276516	34769	*	8	9547	54660.3	8_GES1-WT_peak_19376_lociStitched	Promoter (<=1kb)	19	1269267	1272603	3337	1	1153	uc010dsg.1	0	ENSG00000099622	CIRBP	cold inducible RNA binding protein	uc010dsg.1;uc002lrr.4;uc010xgl.1;uc010xgk.3;uc002lrm.3;uc002lrn.3;uc002lro.3;uc002lrw.4;uc002lrx.5;uc002lrp.3	1153;1153;1153;148046;255057;513;513;55009;55009;90007	0;0;0;0;-3758;0;0;0;0;0	54660.3	superEnhancer	24930
chr5	169121591	169144452	22862	*	4	6337	54553.3	4_GES1-WT_peak_33940_lociStitched	Promoter (<=1kb)	5	169129134	169141461	12328	1	1794	uc010jjl.1	0	ENSG00000134516	DOCK2	dedicator of cytokinesis 2	uc003maf.3;uc011der.2;uc010jjl.1;uc010jjm.3	1794;1794;1794;1794	0;0;0;0	54553.3	superEnhancer	24929
chr2	192709829	192744566	34738	*	5	8399	54465.7	5_GES1-WT_peak_23499_lociStitched	Promoter (<=1kb)	2	192699032	192712006	12975	2	8436	uc002utb.3	0	ENSG00000168497	CAVIN2	caveolae associated protein 2	uc002utb.3	8436	0	54465.7	superEnhancer	24928
chr1	115857009	115880862	23854	*	6	5640	54425.3	6_GES1-WT_peak_2389_lociStitched	Promoter (<=1kb)	1	115828537	115880857	52321	2	4803	uc001efu.1	0	ENSG00000134259	NGF	nerve growth factor	uc001efu.1	4803	0	54425.3	superEnhancer	24927
chr10	28400064	28428915	28852	*	5	7094	54377.4	5_GES1-WT_peak_4976_lociStitched	Exon (uc009xkz.1/143098, exon 5 of 16)	10	28339923	28527664	187742	2	143098	uc009xkz.1	98749	ENSG00000150054	MPP7	membrane palmitoylated protein 7	uc009xkz.1;uc001iua.1;uc001iub.1;uc009xla.2;uc010qdv.1	143098;143098;143098;143098;143098	0;0;0;0;0	54377.4	superEnhancer	24926
chr6	9502398	9538552	36155	*	7	6898	54373.5	7_GES1-WT_peak_34355_lociStitched	Distal Intergenic	6	8652442	8654080	1639	1	728655	uc003myf.4	849956	NA	HULC	hepatocellular carcinoma up-regulated long non-coding RNA	NA	NA	NA	54373.5	superEnhancer	24925
chr9	37929283	37965282	36000	*	7	8167	54349.2	7_GES1-WT_peak_41358_lociStitched	Exon (uc004aax.3/6461, exon 4 of 6)	9	37887594	37904350	16757	2	92014	uc004aav.2	-24933	ENSG00000122696	SLC25A51	solute carrier family 25 member 51	uc004aax.3	6461	0	54349.2	superEnhancer	24924
chr6	129993178	130006069	12892	*	3	4694	54249.5	3_GES1-WT_peak_36092_lociStitched	Intron (uc003qbr.3/93663, intron 1 of 14)	6	129898240	130031370	133131	2	93663	uc003qbr.3	25301	ENSG00000146376	ARHGAP18	Rho GTPase activating protein 18	uc003qbr.3;uc011ebw.2;uc021zfe.1	93663;93663;93663	0;0;0	54249.5	superEnhancer	24923
chr7	12686616	12701759	15144	*	3	6154	54148.9	3_GES1-WT_peak_36962_lociStitched	3' UTR	7	12726452	12730558	4107	1	10124	uc003ssp.3	-24693	ENSG00000122644	ARL4A	ADP ribosylation factor like GTPase 4A	uc003ssn.4;uc010ktt.3;uc003sso.4	85477;85477;85477	0;0;0	54148.9	superEnhancer	24922
chr20	52739232	52758808	19577	*	6	6554	54101	6_GES1-WT_peak_25347_lociStitched	Distal Intergenic	20	52769988	52788492	18505	2	1591	uc002xwu.1	29684	ENSG00000019186	CYP24A1	cytochrome P450 family 24 subfamily A member 1	NA	NA	NA	54101	superEnhancer	24921
chr6	26017517	26057197	39681	*	6	10704	54041.6	6_GES1-WT_peak_34685_lociStitched	Promoter (<=1kb)	6	26055968	26056699	732	2	3006	uc003nfw.3	0	ENSG00000187837	H1-2	H1.2 linker histone, cluster member	uc003nfw.3;uc003nfu.3;uc003nfo.3;uc003nft.1;uc003nfp.1;uc003nfv.3;uc003nfs.1;uc003nfq.3;uc003nfr.3	3006;3018;3024;8335;8350;8352;8358;8359;8366	0;0;0;0;0;0;0;0;0	54041.6	superEnhancer	24920
chr11	27925407	27957441	32035	*	7	7838	54001.4	7_GES1-WT_peak_7163_lociStitched	Distal Intergenic	11	28078362	28078457	96	1	693195	uc021qfg.1	-120921	ENSG00000207874	MIR610	microRNA 610	NA	NA	NA	54001.4	superEnhancer	24919
chr12	53317877	53343559	25683	*	4	6357	53990.8	4_GES1-WT_peak_9660_lociStitched	Promoter (<=1kb)	12	53290971	53320253	29283	2	3856	uc009zmk.1	0	ENSG00000170421	KRT8	keratin 8	uc009zmk.1;uc009zml.2;uc009zmm.2;uc009zmn.2;uc001sbe.3;uc001sbg.3	3856;3856;3856;3875;3875;3875	0;0;0;0;0;0	53990.8	superEnhancer	24918
chr5	17217742	17258321	40580	*	6	6633	53918.6	6_GES1-WT_peak_31782_lociStitched	Promoter (<=1kb)	5	17217670	17276954	59285	1	10409	uc003jfx.4	72	ENSG00000176788	BASP1	brain abundant membrane attached signal protein 1	uc031siz.1;uc003jfx.4;uc003jfw.2;uc031siy.1	10409;10409;285696;285696	0;0;0;0	53918.6	superEnhancer	24917
chr20	45944705	45964107	19403	*	4	5922	53789	4_GES1-WT_peak_25119_lociStitched	Promoter (<=1kb)	20	45947246	45949498	2253	1	100131496	uc010zyb.2	0	ENSG00000267882	LOC100131496	uncharacterized LOC100131496	uc010zyb.2;uc002xst.1;uc002xsu.1;uc002xsv.1;uc002xsw.1;uc002xsx.1;uc002xsy.1;uc010ghr.1;uc002xsz.1;uc002xta.1;uc010zxy.1;uc002xss.2;uc002xtb.1;uc002xtc.1;uc002xtd.1;uc002xte.1;uc002xtf.1;uc010zxz.1;uc010zya.1;uc002xtg.3;uc010ghs.2;uc002xth.3	100131496;23613;23613;23613;23613;23613;23613;23613;23613;23613;23613;23613;23613;23613;23613;23613;23613;23613;23613;23613;23613;23613	0;0;0;0;0;0;0;0;0;0;0;0;0;0;0;0;0;0;0;0;0;0	53789	superEnhancer	24916
chr6	10403318	10427404	24087	*	5	6302	53692.3	5_GES1-WT_peak_34384_lociStitched	Promoter (<=1kb)	6	10412551	10416402	3852	1	100130275	uc003myw.3	0	NA	TFAP2A-AS1	TFAP2A antisense RNA 1	uc003myw.3;uc003myy.1;uc003myx.3;uc003myz.2;uc003myq.3;uc003myr.3;uc003mys.3;uc011dih.2;uc003myt.3;uc003myu.1;uc011dii.1	100130275;100130275;100130275;221718;7020;7020;7020;7020;7020;7020;7020	0;0;0;7651;0;0;0;0;0;0;0	53692.3	superEnhancer	24915
chr22	41681701	41698918	17218	*	4	5347	53622	4_GES1-WT_peak_26754_lociStitched	Promoter (<=1kb)	22	41697507	41732847	35341	1	23264	uc003azv.2	0	ENSG00000100403	ZC3H7B	zinc finger CCCH-type containing 7B	uc003azv.2;uc003azw.4;uc011aoz.2;uc003azs.3;uc003azt.3;uc003azu.3	23264;23264;5905;5905;5905;5905	0;0;-4931;-3183;0;0	53622	superEnhancer	24914
chr15	39410141	39438253	28113	*	5	7024	53530	5_GES1-WT_peak_13680_lociStitched	Distal Intergenic	15	39542885	39547048	4164	1	400360	uc001zkg.2	-104632	ENSG00000175746	LINC02915	long intergenic non-protein coding RNA 2915	NA	NA	NA	53530	superEnhancer	24913
chr10	104387207	104406053	18847	*	6	6019	53521.7	6_GES1-WT_peak_6271_lociStitched	Promoter (<=1kb)	10	104404252	104418076	13825	1	81603	uc001kvz.2	0	ENSG00000171206	TRIM8	tripartite motif containing 8	uc001kvy.2;uc009xxe.2;uc009xxf.2;uc001kvz.2	51684;51684;51684;81603	0;0;0;0	53521.7	superEnhancer	24912
chr9	35510180	35538972	28793	*	7	6876	53500.3	7_GES1-WT_peak_41298_lociStitched	Promoter (<=1kb)	9	35538629	35561895	23267	1	9853	uc003zwx.4	0	ENSG00000198853	RUSC2	RUN and SH3 domain containing 2	uc003zww.3;uc010mkq.3;uc003zwx.4	9853;9853;9853	0;0;0	53500.3	superEnhancer	24911
chrX	45617242	45668744	51503	*	14	8801	53491	14_GES1-WT_peak_43526_lociStitched	Distal Intergenic	23	45606421	45606530	110	2	407007	uc011mlf.1	-10712	ENSG00000207725	MIR222	microRNA 222	NA	NA	NA	53491	superEnhancer	24910
chr3	141120815	141141172	20358	*	6	4167	53344.1	6_GES1-WT_peak_28786_lociStitched	Promoter (<=1kb)	3	141121660	141168632	46973	1	253461	uc003ety.3	0	ENSG00000177311	ZBTB38	zinc finger and BTB domain containing 38	uc003etw.3;uc010hun.3;uc010huo.3;uc003ety.3;uc010hup.3	253461;253461;253461;253461;253461	0;0;0;0;0	53344.1	superEnhancer	24909
chr5	52627216	52659594	32379	*	8	5856	53312	8_GES1-WT_peak_32161_lociStitched	Distal Intergenic	5	52776264	52782304	6041	1	10468	uc003jpc.3	-116670	ENSG00000134363	FST	follistatin	NA	NA	NA	53312	superEnhancer	24908
chr12	104609592	104621628	12037	*	4	4857	53295	4_GES1-WT_peak_10487_lociStitched	Promoter (<=1kb)	12	104609557	104744085	134529	1	7296	uc021rcx.2	35	ENSG00000198431	TXNRD1	thioredoxin reductase 1	uc001tkm.1;uc021rcx.2	7296;7296	0;0	53295	superEnhancer	24907
chr15	93344346	93376121	31776	*	6	8738	53100.9	6_GES1-WT_peak_14805_lociStitched	Distal Intergenic	15	93338714	93340338	1625	1	728619	uc021svm.2	5632	NA	ASB9P1	ankyrin repeat and SOCS box containing 9 pseudogene 1	uc021svm.2	728619	5632	53100.9	superEnhancer	24906
chr3	111621032	111656608	35577	*	5	8400	53038.2	5_GES1-WT_peak_28295_lociStitched	Promoter (<=1kb)	3	111630457	111695364	64908	1	90102	uc003dyi.3	0	ENSG00000144824	PHLDB2	pleckstrin homology like domain family B member 2	uc003dyc.3;uc003dyd.3;uc010hqa.3;uc003dyf.4;uc003dyg.3;uc003dyh.3;uc003dyi.3	90102;90102;90102;90102;90102;90102;90102	0;0;0;0;0;0;0	53038.2	superEnhancer	24905
chr1	59041287	59059489	18203	*	3	7405	52850.6	3_GES1-WT_peak_1495_lociStitched	Promoter (<=1kb)	1	59041095	59043166	2072	2	4070	uc001cyz.4	0	ENSG00000184292	TACSTD2	tumor associated calcium signal transducer 2	uc001cyz.4	4070	0	52850.6	superEnhancer	24904
chr1	241638968	241648152	9185	*	3	3702	52829.4	3_GES1-WT_peak_4379_lociStitched	Distal Intergenic	1	241660857	241683085	22229	2	2271	uc001hyx.3	34933	ENSG00000091483	FH	fumarate hydratase	NA	NA	NA	52829.4	superEnhancer	24903
chr1	204380103	204408428	28326	*	6	7483	52788.3	6_GES1-WT_peak_3638_lociStitched	Promoter (<=1kb)	1	204372492	204380944	8453	2	84919	uc001hav.4	0	ENSG00000158615	PPP1R15B	protein phosphatase 1 regulatory subunit 15B	uc001haw.3;uc010pqv.2;uc001hav.4	5287;5287;84919	0;0;0	52788.3	superEnhancer	24902
chr3	99614328	99649296	34969	*	6	8350	52768.2	6_GES1-WT_peak_28094_lociStitched	Exon (uc003dtm.3/11259, exon 3 of 6)	3	99567139	99595046	27908	2	11259	uc003dtp.1	-19282	ENSG00000168386	FILIP1L	filamin A interacting protein 1 like	uc021xbq.1;uc003dtm.3;uc003dto.3;uc003dtk.2;uc003dtl.3	100313938;11259;11259;84319;84319	0;0;0;0;0	52768.2	superEnhancer	24901
chr2	161061639	161099394	37756	*	9	9309	52526.1	9_GES1-WT_peak_23031_lociStitched	Exon (uc010fow.1/3694, exon 2 of 10)	2	160958233	161056815	98583	2	3694	uc010fov.1	-4824	ENSG00000115221	ITGB6	integrin subunit beta 6	uc010fou.2;uc010zcq.1;uc010fov.1;uc010fow.1	3694;3694;3694;3694	0;0;0;0	52526.1	superEnhancer	24900
chr9	130307288	130342143	34856	*	9	8214	52503.6	9_GES1-WT_peak_42627_lociStitched	Promoter (<=1kb)	9	130267618	130331355	63738	2	64855	uc004brh.3	0	ENSG00000136830	NIBAN2	niban apoptosis regulator 2	uc004brh.3;uc004bri.3;uc004brj.4	64855;64855;64855	0;0;0	52503.6	superEnhancer	24899
chr17	48277989	48297865	19877	*	4	6372	52493.2	4_GES1-WT_peak_17583_lociStitched	Promoter (<=1kb)	17	48261457	48279000	17544	2	1277	uc002iqm.3	0	ENSG00000108821	COL1A1	collagen type I alpha 1 chain	uc002iqm.3;uc031rdc.1	1277;1277	0;0	52493.2	superEnhancer	24898
chr7	22599877	22650617	50741	*	12	9125	52344.4	12_GES1-WT_peak_37124_lociStitched	Promoter (<=1kb)	7	22602956	22613617	10662	1	100506178	uc003svi.2	0	ENSG00000232759	LOC100506178	uncharacterized LOC100506178	uc003svi.2	100506178	0	52344.4	superEnhancer	24897
chr1	209211649	209223475	11827	*	4	5457	52251.7	4_GES1-WT_peak_3771_lociStitched	Distal Intergenic	1	209602168	209605892	3725	1	642587	uc009xcn.3	-378693	ENSG00000230937	MIR205HG	MIR205 host gene	NA	NA	NA	52251.7	superEnhancer	24896
chr2	190118068	190170676	52609	*	8	10518	52109.2	8_GES1-WT_peak_23407_lociStitched	Distal Intergenic	2	189896641	190044605	147965	2	1290	uc002uqk.3	-73463	ENSG00000204262	COL5A2	collagen type V alpha 2 chain	NA	NA	NA	52109.2	superEnhancer	24895
chr6	56573179	56596430	23252	*	7	5545	52038	7_GES1-WT_peak_35418_lociStitched	Intron (uc021zaz.2/667, intron 2 of 93)	6	56503714	56558101	54388	2	667	uc003pde.2	-15078	ENSG00000151914	DST	dystonin	uc021zaz.2;uc021zay.2;uc021zba.2;uc011dxl.1	667;667;667;667	0;0;0;0	52038	superEnhancer	24894
chr2	161208551	161276795	68245	*	12	11735	52023.2	12_GES1-WT_peak_23039_lociStitched	Promoter (<=1kb)	2	161264321	161264393	73	2	100616364	uc021vru.1	0	ENSG00000283734	MIR4785	microRNA 4785	uc021vru.1;uc002ubi.4;uc002ubm.3;uc002ubn.3;uc002ubo.3;uc002ubp.3;uc010fox.2	100616364;5937;5937;5937;5937;5937;5937	0;0;0;0;0;0;0	52023.2	superEnhancer	24893
chr9	4125721	4145396	19676	*	4	5648	51991.9	4_GES1-WT_peak_40961_lociStitched	Promoter (<=1kb)	9	4117768	4145193	27426	2	169792	uc003zib.1	0	ENSG00000107249	GLIS3	GLIS family zinc finger 3	uc003zhw.1;uc003zhx.1;uc003zib.1;uc010mhg.1;uc003zic.1;uc003zid.1;uc003zie.1;uc010mhh.1;uc010mhi.1;uc003zif.1;uc003zig.1;uc003zih.1	169792;169792;169792;169792;169792;169792;169792;169792;169792;169792;169792;169792	0;0;0;0;0;0;0;0;0;0;0;0	51991.9	superEnhancer	24892
chr10	4704190	4747224	43035	*	7	8256	51749.6	7_GES1-WT_peak_4582_lociStitched	Promoter (<=1kb)	10	4621443	4720262	98820	2	100216001	uc001ihe.4	0	ENSG00000231298	MANCR	mitotically associated long non coding RNA	uc001ihe.4;uc001ihf.4;uc001ihg.3	100216001;100216001;338588	0;0;0	51749.6	superEnhancer	24891
chr5	10680257	10703098	22842	*	3	4741	51737.1	3_GES1-WT_peak_31714_lociStitched	3' UTR	5	10679342	10761387	82046	2	1611	uc003jez.4	58289	ENSG00000112977	DAP	death associated protein	uc003jez.4;uc011cmw.2	1611;1611	0;0	51737.1	superEnhancer	24890
chr2	85956341	86024102	67762	*	10	9704	51736.3	10_GES1-WT_peak_22165_lociStitched	Promoter (<=1kb)	2	85980909	86002336	21428	1	84913	uc002sqm.4	0	ENSG00000168874	ATOH8	atonal bHLH transcription factor 8	uc002sqm.4;uc002sqn.3	84913;84913	0;0	51736.3	superEnhancer	24889
chr15	60118783	60123712	4930	*	2	4551	51694	2_GES1-WT_peak_14028_lociStitched	Distal Intergenic	15	59955062	59981642	26581	2	663	uc010uhc.2	-137141	ENSG00000140299	BNIP2	BCL2 interacting protein 2	NA	NA	NA	51694	superEnhancer	24888
chr20	45977451	45989351	11901	*	5	4579	51668.2	5_GES1-WT_peak_25126_lociStitched	Promoter (<=1kb)	20	45838381	45981268	142888	2	23613	uc002xsz.1	0	ENSG00000101040	ZMYND8	zinc finger MYND-type containing 8	uc002xst.1;uc002xsu.1;uc002xsv.1;uc002xsw.1;uc002xsx.1;uc002xsy.1;uc010ghr.1;uc002xsz.1;uc002xta.1;uc010zxy.1;uc002xss.2;uc002xtb.1;uc002xtc.1;uc002xtd.1;uc002xte.1;uc002xtf.1;uc010zxz.1;uc010zya.1;uc010ghs.2;uc002xth.3	23613;23613;23613;23613;23613;23613;23613;23613;23613;23613;23613;23613;23613;23613;23613;23613;23613;23613;23613;23613	0;0;0;0;0;0;0;0;0;0;0;0;0;0;0;0;0;0;0;0	51668.2	superEnhancer	24887
chr6	26188307	26252405	64099	*	12	15033	51567.6	12_GES1-WT_peak_34704_lociStitched	Promoter (<=1kb)	6	26234440	26235216	777	2	3007	uc003nhd.3	0	ENSG00000124575	H1-3	H1.3 linker histone, cluster member	uc003nhd.3;uc003nha.1;uc003ngw.4;uc003ngz.2;uc003ngx.3;uc003ngt.3;uc003nhh.3;uc003ngv.4;uc003nhc.4;uc003ngu.3;uc003nhe.1;uc003ngy.3;uc003nhf.3;uc003nhg.1	3007;3012;3013;8339;8343;8344;8345;8351;8353;8360;8361;8367;8369;8968	0;0;0;0;0;4283;0;0;0;0;0;0;0;0	51567.6	superEnhancer	24886
chr7	129464860	129495724	30865	*	5	7767	51526	5_GES1-WT_peak_38697_lociStitched	3' UTR	7	129414745	129414854	110	2	406959	uc003vpd.2	-50006	ENSG00000207691	MIR183	microRNA 183	uc022aln.1;uc003vpf.2;uc003vpg.2	7328;7328;7328	0;0;0	51526	superEnhancer	24885
chr1	23493993	23525763	31771	*	7	7550	51500.8	7_GES1-WT_peak_700_lociStitched	Promoter (<=1kb)	1	23518388	23521222	2835	2	3352	uc001bgn.3	0	ENSG00000179546	HTR1D	5-hydroxytryptamine receptor 1D	uc001bgn.3;uc001bgk.2;uc010odv.1;uc001bgl.3;uc001bgm.1	3352;7798;7798;7798;7798	0;0;0;0;0	51500.8	superEnhancer	24884
chr11	118478516	118505882	27367	*	7	5062	51452.7	7_GES1-WT_peak_8571_lociStitched	Promoter (<=1kb)	11	118498021	118528748	30728	1	23187	uc001ptv.2	0	ENSG00000019144	PHLDB1	pleckstrin homology like domain family B member 1	uc001ptr.2;uc010ryh.1;uc001pts.3;uc001ptt.3;uc001ptu.2;uc001ptv.2;uc001ptw.2;uc001ptx.2;uc009zai.2;uc001ptq.3;uc009zag.3;uc010ryg.2	23187;23187;23187;23187;23187;23187;23187;23187;23187;372;372;372	0;0;0;0;0;0;0;0;0;0;0;0	51452.7	superEnhancer	24883
chr1	27852261	27869747	17487	*	7	5403	51441.5	7_GES1-WT_peak_866_lociStitched	3' UTR	1	27730734	27816678	85945	2	10163	uc010ofl.2	-35583	ENSG00000158195	WASF2	WASP family member 2	uc009vsy.3;uc009vsz.1	27245;27245	0;0	51441.5	superEnhancer	24882
chr5	6418485	6449489	31005	*	5	8328	51331.9	5_GES1-WT_peak_31643_lociStitched	Promoter (<=1kb)	5	6448736	6496834	48099	1	134111	uc003jdp.4	0	ENSG00000215218	UBE2QL1	ubiquitin conjugating enzyme E2 Q family like 1	uc003jdp.4	134111	0	51331.9	superEnhancer	24881
chr3	123468443	123478143	9701	*	2	4981	51160.2	2_GES1-WT_peak_28465_lociStitched	3' UTR	3	123331143	123512691	181549	2	4638	uc011bjw.2	34548	ENSG00000065534	MYLK	myosin light chain kinase	uc011bjw.2;uc003ego.3;uc003egp.3;uc003egq.3;uc003egr.3;uc003egs.3;uc010hrs.1;uc003egu.1	4638;4638;4638;4638;4638;4638;4638;4638	0;0;0;0;0;0;0;0	51160.2	superEnhancer	24880
chr2	221363522	221379047	15526	*	2	5003	51122.5	2_GES1-WT_peak_23924_lociStitched	Distal Intergenic	2	220771223	220771286	64	2	100422959	uc021vxd.1	-592236	ENSG00000266518	MIR4268	microRNA 4268	NA	NA	NA	51122.5	superEnhancer	24879
chr15	71054858	71104483	49626	*	9	8356	50975.8	9_GES1-WT_peak_14318_lociStitched	Promoter (<=1kb)	15	70946893	71055850	108958	2	55075	uc002asr.3	0	ENSG00000137831	UACA	uveal autoantigen with coiled-coil domains and ankyrin repeats	uc002asr.3;uc010uke.2	55075;55075	0;0	50975.8	superEnhancer	24878
chr10	92672134	92730026	57893	*	9	9976	50847.4	9_GES1-WT_peak_5995_lociStitched	Promoter (<=1kb)	10	92671857	92681032	9176	2	27063	uc001khe.1	0	ENSG00000148677	ANKRD1	ankyrin repeat domain 1	uc001khd.2;uc001khe.1	10556;27063	0;0	50847.4	superEnhancer	24877
chr5	14097486	14115967	18482	*	3	5760	50842.1	3_GES1-WT_peak_31739_lociStitched	Distal Intergenic	5	14143829	14509458	365630	1	7204	uc003jff.3	-27862	ENSG00000038382	TRIO	trio Rho guanine nucleotide exchange factor	NA	NA	NA	50842.1	superEnhancer	24876
chr1	150509979	150552737	42759	*	6	7223	50678	6_GES1-WT_peak_2714_lociStitched	Promoter (<=1kb)	1	150524405	150524490	86	1	100422997	uc021oye.1	0	ENSG00000264553	MIR4257	microRNA 4257	uc021oye.1;uc010pch.2;uc001euz.3;uc001eva.3;uc021oyf.1;uc001euw.3;uc001eux.3;uc009wlw.3;uc010pcg.2;uc009wlx.3	100422997;4170;4170;4170;4170;54507;54507;54507;54507;54507	0;0;0;0;0;0;0;0;0;0	50678	superEnhancer	24875
chr14	59718802	59746155	27354	*	10	6972	50583	10_GES1-WT_peak_12708_lociStitched	Promoter (<=1kb)	14	59730159	59838123	107965	1	23002	uc031qou.1	0	ENSG00000100592	DAAM1	dishevelled associated activator of morphogenesis 1	uc001xdy.4;uc001xea.2;uc001xeb.1;uc031qou.1	23002;23002;23002;23002	0;0;0;0	50583	superEnhancer	24874
chr17	39254406	39297899	43494	*	9	9015	50579.2	9_GES1-WT_peak_17256_lociStitched	Promoter (<=1kb)	17	39261641	39262740	1100	1	100132386	uc010wfp.2	0	ENSG00000212722	KRTAP4-9	keratin associated protein 4-9	uc010wfp.2;uc002hvz.3;uc010wfo.2;uc010cxk.2;uc002hwa.3	100132386;653240;728224;81871;83755	0;0;-31;0;0	50579.2	superEnhancer	24873
chr21	36253344	36263765	10422	*	4	4697	50522.7	4_GES1-WT_peak_25840_lociStitched	Promoter (<=1kb)	21	36160098	36260987	100890	2	861	uc002yuh.3	0	ENSG00000159216	RUNX1	RUNX family transcription factor 1	uc002yuh.3;uc010gmu.3;uc002yuj.4;uc010gmv.3;uc002yuk.4;uc002yum.1;uc002yuo.1;uc010gmw.1;uc002yur.1;uc002yut.1	861;861;861;861;861;861;861;861;861;861	0;0;0;0;0;0;0;0;0;0	50522.7	superEnhancer	24872
chr1	153537469	153552053	14585	*	2	5325	50471.4	2_GES1-WT_peak_2799_lociStitched	Promoter (<=1kb)	1	153533585	153538306	4722	2	6273	uc001fcb.3	0	ENSG00000196754	S100A2	S100 calcium binding protein A2	uc001fcb.3	6273	0	50471.4	superEnhancer	24871
chr3	191599222	191620665	21444	*	3	6872	50153.2	3_GES1-WT_peak_29514_lociStitched	Distal Intergenic	3	191178952	191179245	294	1	152138	uc011bso.2	420270	ENSG00000253548	PYDC2	pyrin domain containing 2	NA	NA	NA	50153.2	superEnhancer	24870
chr12	77104625	77115604	10980	*	2	4318	50088.6	2_GES1-WT_peak_10137_lociStitched	Distal Intergenic	12	77157854	77216311	58458	1	23390	uc001syi.1	-42250	ENSG00000186908	ZDHHC17	zinc finger DHHC-type palmitoyltransferase 17	NA	NA	NA	50088.6	superEnhancer	24869
chr1	8921143	8965901	44759	*	8	9031	50076.4	8_GES1-WT_peak_345_lociStitched	Promoter (<=1kb)	1	8938894	8939943	1050	1	100505975	uc021oft.1	0	ENSG00000230679	ENO1-AS1	ENO1 antisense RNA 1	uc021oft.1;uc001api.2;uc001apj.2;uc009vml.2;uc009vmm.3	100505975;2023;2023;2023;2023	0;0;0;0;0	50076.4	superEnhancer	24868
chr6	140064145	140088015	23871	*	6	6411	50071.8	6_GES1-WT_peak_36260_lociStitched	Distal Intergenic	6	140092210	140181608	89399	1	100132735	uc003qir.3	-4195	ENSG00000231426	FILNC1	FOXO induced long non-coding RNA 1	uc003qir.3	100132735	0	50071.8	superEnhancer	24867
chr16	82660735	82672925	12191	*	4	5910	49950.2	4_GES1-WT_peak_16189_lociStitched	Promoter (<=1kb)	16	82660399	83830215	1169817	1	1012	uc010vnu.2	336	ENSG00000140945	CDH13	cadherin 13	uc010chh.3;uc021tlw.1;uc002fgx.3;uc010vns.2;uc010vnt.2;uc010vnu.2	1012;1012;1012;1012;1012;1012	0;0;0;0;0;0	49950.2	superEnhancer	24866
chr20	43954845	43992137	37293	*	8	6252	49935.3	8_GES1-WT_peak_25080_lociStitched	Promoter (<=1kb)	20	43953929	43977064	23136	2	6385	uc002xnu.3	0	ENSG00000124145	SDC4	syndecan 4	uc002xnu.3;uc010zws.2;uc002xnx.3;uc021weh.1;uc002xnv.3;uc002xnw.2;uc010gha.3	6385;6385;767557;90196;90196;90196;90196	0;0;0;0;0;0;0	49935.3	superEnhancer	24865
chr13	102101488	102127105	25618	*	5	6341	49921.8	5_GES1-WT_peak_11900_lociStitched	Promoter (<=1kb)	13	102104944	102368796	263853	1	9358	uc001vpb.4	0	ENSG00000198542	ITGBL1	integrin subunit beta like 1	uc001vpb.4;uc010agb.4;uc001vpc.5	9358;9358;9358	0;0;0	49921.8	superEnhancer	24864
chr17	39203174	39219256	16083	*	5	4940	49873.4	5_GES1-WT_peak_17249_lociStitched	Promoter (<=1kb)	17	39210751	39211463	713	2	728279	uc010cxj.3	0	ENSG00000214518	KRTAP2-2	keratin associated protein 2-2	uc010cxj.3;uc002hvx.3;uc010cxi.3;uc002hvy.3	728279;730755;81872;85294	0;0;0;2875	49873.4	superEnhancer	24863
chr1	154933433	154956503	23071	*	4	7044	49826.4	4_GES1-WT_peak_2842_lociStitched	Promoter (<=1kb)	1	154948169	154948259	91	1	100423020	uc021pai.1	0	ENSG00000264349	MIR4258	microRNA 4258	uc021pai.1;uc001fga.3;uc001fgb.3;uc001ffr.3;uc001ffs.3;uc010pep.2;uc001ffv.3;uc001ffw.3;uc001ffx.3;uc001ffy.3;uc001ffz.1;uc001fgc.3;uc001fgd.2;uc001fge.2;uc001fgf.2;uc001fgg.2;uc001fgh.1;uc001fft.3	100423020;1163;1163;57326;57326;57326;6464;6464;6464;6464;6464;80308;80308;80308;80308;80308;80308;90780	0;0;0;-4866;-4866;-4866;0;0;0;0;0;0;0;0;0;0;-4030;0	49826.4	superEnhancer	24862
chr6	27774970	27807556	32587	*	8	9816	49643	8_GES1-WT_peak_34764_lociStitched	Promoter (<=1kb)	6	27805658	27806117	460	2	8330	uc003njs.3	0	ENSG00000275221	H2AC15	H2A clustered histone 15	uc003njs.3;uc003njn.1;uc003njl.3;uc003njv.3;uc003njo.3;uc003njm.3;uc003njr.3;uc003njp.3	8330;8331;8340;8341;8342;8357;8362;8363	0;0;0;0;0;0;0;0	49643	superEnhancer	24861
chr1	115710248	115733793	23546	*	4	6702	49625.5	4_GES1-WT_peak_2378_lociStitched	Distal Intergenic	1	115590633	115632121	41489	2	10100	uc021osc.1	-78127	ENSG00000134198	TSPAN2	tetraspanin 2	NA	NA	NA	49625.5	superEnhancer	24860
chr19	43255559	43267829	12271	*	3	3601	49502.4	3_GES1-WT_peak_20357_lociStitched	Promoter (<=1kb)	19	43256839	43263002	6164	2	440533	uc010eim.4	0	ENSG00000124467	PSG8	pregnancy specific beta-1-glycoprotein 8	uc010eim.4;uc002ouh.3;uc010ein.3;uc002ouo.2;uc002oug.1;uc002oun.3;uc002ouf.3	440533;440533;440533;440533;5669;5669;5671	0;0;0;0;0;0;0	49502.4	superEnhancer	24859
chr10	69894254	69897698	3445	*	1	3446	49394.4	1_GES1-WT_peak_5569_lociStitched	5' UTR	10	69869190	69971773	102584	1	84665	uc010qiu.3	25064	ENSG00000138347	MYPN	myopalladin	uc001jnl.2;uc001jnm.5;uc001jnn.5;uc001jno.4;uc001jnp.1;uc009xps.3;uc009xpt.3;uc010qit.3;uc010qiu.3	84665;84665;84665;84665;84665;84665;84665;84665;84665	0;0;0;0;0;0;0;0;0	49394.4	superEnhancer	24858
chr8	46839091	46856256	17166	*	6	4444	49271.6	6_GES1-WT_peak_39788_lociStitched	Distal Intergenic	8	47752508	47765991	13484	1	497634	uc010lxr.1	-896252	ENSG00000253314	LINC00293	long intergenic non-protein coding RNA 293	NA	NA	NA	49271.6	superEnhancer	24857
chr18	26734214	26762139	27926	*	6	6287	49264.3	6_GES1-WT_peak_18789_lociStitched	Distal Intergenic	18	25530930	25757445	226516	2	1000	uc002kwg.2	-976769	ENSG00000170558	CDH2	cadherin 2	NA	NA	NA	49264.3	superEnhancer	24856
chr5	119939712	119960811	21100	*	5	5062	49228.4	5_GES1-WT_peak_33058_lociStitched	Promoter (<=1kb)	5	119952832	120022964	70133	1	51334	uc003ksr.3	0	ENSG00000184838	PRR16	proline rich 16	uc003ksp.3;uc003ksq.3;uc003ksr.3	51334;51334;51334	0;0;0	49228.4	superEnhancer	24855
chr12	109225838	109233758	7921	*	2	4648	48952.6	2_GES1-WT_peak_10615_lociStitched	Intron (uc001tnm.3/54434, intron 2 of 14)	12	109185695	109221327	35633	2	54434	uc010sxg.2	-4511	ENSG00000084112	SSH1	slingshot protein phosphatase 1	uc001tnm.3;uc010sxg.2;uc001tnn.4	54434;54434;54434	0;0;0	48952.6	superEnhancer	24854
chr5	35856365	35859508	3144	*	2	2841	48840.8	2_GES1-WT_peak_31965_lociStitched	Promoter (<=1kb)	5	35856977	35875824	18848	1	3575	uc011coo.3	0	ENSG00000168685	IL7R	interleukin 7 receptor	uc011coo.3;uc003jjs.4;uc011cop.3	3575;3575;3575	0;0;0	48840.8	superEnhancer	24853
chr17	57905600	57916608	11009	*	4	4258	48840.3	4_GES1-WT_peak_17744_lociStitched	Exon (uc002ixu.4/81671, exon 11 of 12)	17	57918627	57918698	72	1	406991	uc002ixv.3	-2019	ENSG00000284190	MIR21	microRNA 21	uc002ixv.3;uc002ixu.4;uc010wog.2;uc010woh.2;uc010woi.2;uc010woj.2	406991;81671;81671;81671;81671;81671	-2019;0;0;0;0;0	48840.3	superEnhancer	24852
chr10	17685370	17716774	31405	*	4	6863	48825.4	4_GES1-WT_peak_4812_lociStitched	Promoter (<=1kb)	10	17686124	17758821	72698	1	8027	uc001ipj.2	0	ENSG00000136738	STAM	signal transducing adaptor molecule	uc001ipj.2;uc010qcf.2	8027;8027	0;0	48825.4	superEnhancer	24851
chr16	24988287	25026637	38351	*	5	9591	48724.9	5_GES1-WT_peak_15437_lociStitched	Promoter (<=1kb)	16	24930712	25026675	95964	2	55114	uc002dnb.3	38	ENSG00000140750	ARHGAP17	Rho GTPase activating protein 17	uc002dnb.3;uc002dnc.3;uc010vcf.2;uc002dng.1	55114;55114;55114;55114	0;0;0;0	48724.9	superEnhancer	24850
chr2	37915334	37940953	25620	*	3	7487	48698.5	3_GES1-WT_peak_21428_lociStitched	Distal Intergenic	2	37869025	37899678	30654	2	10602	uc031roa.1	-15656	ENSG00000163171	CDC42EP3	CDC42 effector protein 3	NA	NA	NA	48698.5	superEnhancer	24849
chr20	9030875	9050910	20036	*	5	6281	48493.1	5_GES1-WT_peak_24532_lociStitched	Promoter (<=1kb)	20	9049701	9438136	388436	1	5332	uc010gbw.1	0	ENSG00000101333	PLCB4	phospholipase C beta 4	uc010gbw.1;uc010gbx.3	5332;5332	0;0	48493.1	superEnhancer	24848
chr7	129992325	130014556	22232	*	6	5894	48307.9	6_GES1-WT_peak_38722_lociStitched	3' UTR	7	130020290	130023931	3642	1	1357	uc011kpf.1	-5734	ENSG00000091704	CPA1	carboxypeptidase A1	uc003vps.2;uc003vpt.2;uc010lmd.1;uc010lme.1;uc003vpu.1	93979;93979;93979;93979;93979	0;0;0;0;0	48307.9	superEnhancer	24847
chr3	58025507	58052591	27085	*	7	5812	48306.1	7_GES1-WT_peak_27776_lociStitched	Intron (uc003djj.2/2317, intron 1 of 45)	3	58063983	58157982	94000	1	2317	uc003djl.2	-11392	ENSG00000136068	FLNB	filamin B	uc003djj.2;uc003djk.2;uc010hne.2;uc010hnf.2	2317;2317;2317;2317	0;0;0;0	48306.1	superEnhancer	24846
chr11	96039618	96076379	36762	*	6	7326	48301.6	6_GES1-WT_peak_8241_lociStitched	Promoter (<=1kb)	11	96074602	96074690	89	1	100422991	uc021qoz.1	0	ENSG00000266192	MIR1260B	microRNA 1260b	uc021qoz.1;uc001pfw.1	100422991;84441	0;0	48301.6	superEnhancer	24845
chr3	159160356	159176893	16538	*	5	5657	48286	5_GES1-WT_peak_29071_lociStitched	Intron (uc003fcq.2/100505385, intron 4 of 10)	3	159000435	159000523	89	1	100500803	uc021xgn.1	159921	ENSG00000263634	MIR3919	microRNA 3919	uc003fcq.2;uc003fcr.2;uc003fcs.2;uc003fct.2;uc021xgm.1	100505385;100505385;29970;29970;29970	0;0;0;0;0	48286	superEnhancer	24844
chr5	142622450	142639076	16627	*	4	4332	48241.6	4_GES1-WT_peak_33489_lociStitched	Distal Intergenic	5	142661151	142780417	119267	2	2908	uc031slp.1	141341	ENSG00000113580	NR3C1	nuclear receptor subfamily 3 group C member 1	NA	NA	NA	48241.6	superEnhancer	24843
chr5	71673945	71708998	35054	*	4	8110	48220.3	4_GES1-WT_peak_32512_lociStitched	Distal Intergenic	5	71616200	71656038	39839	1	79810	uc003kcd.3	57745	ENSG00000049883	PTCD2	pentatricopeptide repeat domain 2	NA	NA	NA	48220.3	superEnhancer	24842
chr8	126441156	126444268	3113	*	1	3114	48064.7	1_GES1-WT_peak_40587_lociStitched	Promoter (<=1kb)	8	126442563	126450644	8082	1	10221	uc003yrx.3	0	ENSG00000173334	TRIB1	tribbles pseudokinase 1	uc003yrx.3;uc011lis.2;uc010mdn.3	10221;10221;10221	0;-242;-1675	48064.7	superEnhancer	24841
chr10	80909001	80923641	14641	*	4	5941	47860	4_GES1-WT_peak_5848_lociStitched	5' UTR	10	80899439	80977183	77745	1	57178	uc001kae.3	9562	ENSG00000108175	ZMIZ1	zinc finger MIZ-type containing 1	uc001kaf.2;uc001kae.3	57178;57178	0;0	47860	superEnhancer	24840
chr12	10305730	10345440	39711	*	9	7995	47673.1	9_GES1-WT_peak_9009_lociStitched	Promoter (<=1kb)	12	10331557	10344403	12847	1	120939	uc001qxq.3	0	ENSG00000165685	TMEM52B	transmembrane protein 52B	uc001qxq.3;uc001qxr.3;uc010sgz.1;uc001qxo.1;uc010sha.1;uc021qvb.1	120939;120939;4973;4973;4973;4973	0;0;0;0;0;0	47673.1	superEnhancer	24839
chr9	116382033	116385870	3838	*	2	3428	47456.9	2_GES1-WT_peak_42310_lociStitched	Distal Intergenic	9	116356434	116360023	3590	1	5998	uc031tev.1	25599	ENSG00000138835	RGS3	regulator of G protein signaling 3	NA	NA	NA	47456.9	superEnhancer	24838
chr7	40239284	40272230	32947	*	4	5846	47430.5	4_GES1-WT_peak_37459_lociStitched	Intron (uc003thn.2/79783, intron 6 of 13)	7	40174575	40900366	725792	1	79783	uc022acd.1	64709	ENSG00000175600	SUGCT	succinyl-CoA:glutarate-CoA transferase	uc003thn.2;uc003tho.2;uc022acd.1	79783;79783;79783	0;0;0	47430.5	superEnhancer	24837
chr9	121080803	121100425	19623	*	4	4977	47344.4	4_GES1-WT_peak_42433_lociStitched	Distal Intergenic	9	120466453	120479769	13317	1	7099	uc004bkb.4	614350	ENSG00000136869	TLR4	toll like receptor 4	NA	NA	NA	47344.4	superEnhancer	24836
chr10	63785207	63810824	25618	*	5	7535	47336.9	5_GES1-WT_peak_5488_lociStitched	Promoter (<=1kb)	10	63808970	63856707	47738	1	84159	uc001jlu.2	0	ENSG00000150347	ARID5B	AT-rich interaction domain 5B	uc010qil.2;uc001jlt.2;uc001jlu.2	84159;84159;84159	0;0;0	47336.9	superEnhancer	24835
chr1	240927718	240930963	3246	*	2	2918	47328	2_GES1-WT_peak_4355_lociStitched	Distal Intergenic	1	240938817	240950738	11922	2	6000	uc010pyi.1	19775	ENSG00000182901	RGS7	regulator of G protein signaling 7	uc010pyh.2	6000	0	47328	superEnhancer	24834
chr3	105070408	105085196	14789	*	6	4475	47216.8	6_GES1-WT_peak_28171_lociStitched	Promoter (<=1kb)	3	105085557	105244230	158674	1	214	uc003dvv.3	-361	ENSG00000170017	ALCAM	activated leukocyte cell adhesion molecule	uc003dvv.3;uc003dvw.2;uc003dvx.3;uc003dvy.3	214;214;214;214	0;0;0;0	47216.8	superEnhancer	24833
chr12	68302037	68314894	12858	*	4	4876	47210.7	4_GES1-WT_peak_10010_lociStitched	Distal Intergenic	12	68548550	68553521	4972	2	3458	uc001stw.1	238627	ENSG00000111537	IFNG	interferon gamma	NA	NA	NA	47210.7	superEnhancer	24832
chr13	109895046	109926330	31285	*	6	6985	47199.7	6_GES1-WT_peak_11963_lociStitched	Distal Intergenic	13	109816253	109819651	3399	2	100885782	uc031qng.1	-75395	ENSG00000236242	MYO16-AS1	MYO16 antisense RNA 1	NA	NA	NA	47199.7	superEnhancer	24831
chr1	238810606	238823011	12406	*	5	5362	47156.4	5_GES1-WT_peak_4308_lociStitched	Distal Intergenic	1	238643684	238649317	5634	2	339535	uc001hyn.3	-161289	ENSG00000215808	LINC01139	long intergenic non-protein coding RNA 1139	NA	NA	NA	47156.4	superEnhancer	24830
chr5	52674471	52721630	47160	*	9	8648	46943.1	9_GES1-WT_peak_32171_lociStitched	Distal Intergenic	5	52776264	52782304	6041	1	10468	uc003jpc.3	-54634	ENSG00000134363	FST	follistatin	NA	NA	NA	46943.1	superEnhancer	24829
chr11	64602670	64646895	44226	*	9	10849	46923.8	9_GES1-WT_peak_7633_lociStitched	Promoter (<=1kb)	11	64620208	64623332	3125	2	10938	uc021qkz.1	0	ENSG00000110047	EHD1	EH domain containing 1	uc021qkz.1;uc001obu.1;uc001obv.1;uc010rnq.1;uc001obs.4	10938;10938;10938;10938;55561	0;0;0;0;0	46923.8	superEnhancer	24828
chr2	35674843	35689848	15006	*	4	5158	46910.3	4_GES1-WT_peak_21360_lociStitched	Distal Intergenic	2	36581892	36582713	822	2	100288911	uc021vfw.1	892865	NA	CRIM1-DT	CRIM1 divergent transcript	NA	NA	NA	46910.3	superEnhancer	24827
chr10	47049292	47058893	9602	*	2	4083	46860.6	2_GES1-WT_peak_5266_lociStitched	Intron (uc001jed.5/653145, intron 3 of 3)	10	47083534	47088320	4787	1	5540	uc001jee.3	-24641	ENSG00000204174	NPY4R	neuropeptide Y receptor Y4	uc001jed.5	653145	0	46860.6	superEnhancer	24826
chr2	112251193	112262788	11596	*	4	5191	46854.8	4_GES1-WT_peak_22497_lociStitched	Promoter (<=1kb)	2	111965359	112252692	287334	2	541471	uc002the.2	0	ENSG00000172965	MIR4435-2HG	MIR4435-2 host gene	uc002the.2;uc010yxl.1;uc002thf.4	541471;541471;541471	0;0;0	46854.8	superEnhancer	24825
chr14	55091171	55153718	62548	*	7	9157	46773.4	7_GES1-WT_peak_12633_lociStitched	Promoter (<=1kb)	14	55154715	55170589	15875	1	23034	uc001xbe.3	-997	ENSG00000020577	SAMD4A	sterile alpha motif domain containing 4A	uc001xba.3;uc001xbb.4;uc001xbc.3;uc001xbe.3;uc001xbf.2	23034;23034;23034;23034;23034	0;0;0;-997;-997	46773.4	superEnhancer	24824
chr2	36582096	36616929	34834	*	9	6539	46768.1	9_GES1-WT_peak_21373_lociStitched	Promoter (<=1kb)	2	36581892	36582713	822	2	100288911	uc021vfw.1	0	NA	CRIM1-DT	CRIM1 divergent transcript	uc021vfw.1;uc002rpd.3	100288911;51232	0;0	46768.1	superEnhancer	24823
chr3	185531028	185543732	12705	*	5	5626	46762	5_GES1-WT_peak_29403_lociStitched	Promoter (<=1kb)	3	185361527	185538919	177393	2	10644	uc010hyi.3	0	ENSG00000073792	IGF2BP2	insulin like growth factor 2 mRNA binding protein 2	uc010hyi.3;uc010hyj.3;uc010hyk.3;uc010hyl.3;uc003fpo.3;uc003fpp.3;uc003fpq.3	10644;10644;10644;10644;10644;10644;10644	0;0;0;0;0;0;0	46762	superEnhancer	24822
chr21	45005426	45030047	24622	*	6	7381	46683.3	6_GES1-WT_peak_26063_lociStitched	Exon (uc011aey.2/11077, exon 6 of 7)	21	44949072	45078201	129130	2	11077	uc011aey.2	48154	ENSG00000160207	HSF2BP	heat shock transcription factor 2 binding protein	uc011aey.2;uc002zdi.3	11077;11077	0;0	46683.3	superEnhancer	24821
chr11	28777588	28789934	12347	*	3	4358	46637.1	3_GES1-WT_peak_7191_lociStitched	Distal Intergenic	11	28131713	28147409	15697	1	196074	uc001msf.1	645875	ENSG00000169519	METTL15	methyltransferase like 15	NA	NA	NA	46637.1	superEnhancer	24820
chr19	43685058	43688599	3542	*	1	3543	46626.9	1_GES1-WT_peak_20402_lociStitched	Intron (uc010xwk.2/5675, intron 1 of 3)	19	43671895	43690688	18794	2	5673	uc002ovu.3	2089	ENSG00000204941	PSG5	pregnancy specific beta-1-glycoprotein 5	uc002ovu.3;uc002ovx.3;uc010xwk.2	5673;5673;5675	0;0;0	46626.9	superEnhancer	24819
chr2	36787990	36797184	9195	*	2	5509	46466.9	2_GES1-WT_peak_21395_lociStitched	Exon (uc002rpg.2/9637, exon 6 of 9)	2	36779404	36821709	42306	2	9637	uc002rpf.2	24525	ENSG00000171055	FEZ2	fasciculation and elongation protein zeta 2	uc002rpf.2;uc002rpg.2;uc002rph.2;uc002rpj.2	9637;9637;9637;9637	0;0;0;0	46466.9	superEnhancer	24818
chr16	75271880	75306754	34875	*	7	7954	46244.2	7_GES1-WT_peak_16100_lociStitched	Promoter (<=1kb)	16	75262928	75272980	10053	2	9564	uc002fdu.3	0	ENSG00000050820	BCAR1	BCAR1 scaffold protein, Cas family member	uc002fdt.3;uc002fdu.3;uc010vna.2;uc002fdv.3;uc010cgu.3;uc002fdw.3;uc010vnb.2;uc010vnc.2;uc010vnd.2;uc002fdx.3	9564;9564;9564;9564;9564;9564;9564;9564;9564;9564	-1479;0;0;0;0;0;0;0;0;0	46244.2	superEnhancer	24817
chr5	9621071	9625392	4322	*	3	3671	46227.7	3_GES1-WT_peak_31675_lociStitched	Distal Intergenic	5	9629109	9630463	1355	2	50834	uc003jem.1	5071	ENSG00000169777	TAS2R1	taste 2 receptor member 1	uc003jem.1	50834	5071	46227.7	superEnhancer	24816
chr22	27597932	27649095	51164	*	7	9289	46221.6	7_GES1-WT_peak_26386_lociStitched	Exon (uc003adh.3/uc003adh.3, exon 1 of 3)	22	28144265	28187871	43607	2	4330	uc010gvg.4	538776	ENSG00000169184	MN1	MN1 proto-oncogene, transcriptional regulator	NA	NA	NA	46221.6	superEnhancer	24815
chr14	23446362	23451682	5321	*	5	3427	46170.3	5_GES1-WT_peak_12153_lociStitched	Promoter (<=1kb)	14	23440410	23446432	6023	2	84962	uc001why.3	0	ENSG00000129474	AJUBA	ajuba LIM protein	uc001wib.2;uc001wic.2;uc001wia.4;uc001wie.3;uc001wif.3;uc001wig.3;uc001wih.3;uc001why.3;uc001whz.3	60686;60686;60686;60686;60686;60686;60686;84962;84962	17660;18564;0;0;0;0;0;0;0	46170.3	superEnhancer	24814
chr3	148618843	148628993	10151	*	2	3842	46159.6	2_GES1-WT_peak_28862_lociStitched	Distal Intergenic	3	148583043	148614872	31830	1	1359	uc003ewm.3	35800	ENSG00000163751	CPA3	carboxypeptidase A3	uc003ewm.3	1359	0	46159.6	superEnhancer	24813
chr9	118431163	118436728	5566	*	2	3244	45934.5	2_GES1-WT_peak_42383_lociStitched	Distal Intergenic	9	118650544	118687377	36834	2	58483	uc004bjm.3	250649	ENSG00000204148	LINC00474	long intergenic non-protein coding RNA 474	NA	NA	NA	45934.5	superEnhancer	24812
chr14	34024567	34040264	15698	*	4	5769	45916.7	4_GES1-WT_peak_12303_lociStitched	Exon (uc001wrs.3/64067, exon 5 of 12)	14	33684388	34150248	465861	1	64067	uc001wrw.3	340179	ENSG00000151322	NPAS3	neuronal PAS domain protein 3	uc001wrs.3;uc001wrt.3;uc001wru.3;uc001wrv.3;uc001wrw.3	64067;64067;64067;64067;64067	0;0;0;0;0	45916.7	superEnhancer	24811
chr15	85874687	85901187	26501	*	6	5411	45878.5	6_GES1-WT_peak_14657_lociStitched	Distal Intergenic	15	85923847	86080227	156381	1	11214	uc002bls.4	-22660	ENSG00000170776	AKAP13	A-kinase anchoring protein 13	NA	NA	NA	45878.5	superEnhancer	24810
chr12	122202928	122250421	47494	*	11	8072	45874.5	11_GES1-WT_peak_10832_lociStitched	Promoter (<=1kb)	12	122242638	122261655	19018	1	23067	uc021rfg.1	0	ENSG00000139718	SETD1B	SET domain containing 1B, histone lysine methyltransferase	uc001ubc.4;uc009zxh.3;uc021rfg.1;uc001ubi.3;uc001ube.4;uc009zxi.1;uc001ubb.3;uc001ubd.4	144404;144404;23067;23067;338799;338799;54509;54509	0;0;0;0;0;0;0;0	45874.5	superEnhancer	24809
chr1	230984675	231006221	21547	*	6	7498	45819.7	6_GES1-WT_peak_4159_lociStitched	Promoter (<=1kb)	1	230972865	230991782	18918	2	84886	uc009xfh.2	0	ENSG00000119280	C1orf198	chromosome 1 open reading frame 198	uc009xfh.2;uc001hub.3;uc001huc.2;uc001hud.2	84886;84886;84886;84886	0;0;0;0	45819.7	superEnhancer	24808
chr5	97631986	97651321	19336	*	6	4463	45754.8	6_GES1-WT_peak_32892_lociStitched	Distal Intergenic	5	98104999	98116889	11891	1	285704	uc003knb.2	-453678	ENSG00000174136	RGMB	repulsive guidance molecule BMP co-receptor b	NA	NA	NA	45754.8	superEnhancer	24807
chr12	52539772	52543258	3487	*	3	2756	45750.1	3_GES1-WT_peak_9630_lociStitched	Distal Intergenic	12	52562780	52579533	16754	2	144501	uc001rzw.3	36275	ENSG00000167767	KRT80	keratin 80	NA	NA	NA	45750.1	superEnhancer	24806
chr18	10912479	10937360	24882	*	3	6530	45733.1	3_GES1-WT_peak_18537_lociStitched	Intron (uc002kos.2/63895, intron 3 of 51)	18	10797372	10890690	93319	2	63895	uc002kow.1	-21789	ENSG00000154864	PIEZO2	piezo type mechanosensitive ion channel component 2	uc002kos.2	63895	0	45733.1	superEnhancer	24805
chr1	112318358	112322751	4394	*	3	3532	45723.5	3_GES1-WT_peak_2311_lociStitched	3' UTR	1	112303019	112310199	7181	1	11218	uc001ebt.3	15339	ENSG00000064703	DDX20	DEAD-box helicase 20	uc001ebu.1;uc001ebv.1	3752;3752	0;0	45723.5	superEnhancer	24804
chr11	12087377	12112066	24690	*	6	7716	45683.9	6_GES1-WT_peak_6963_lociStitched	Distal Intergenic	11	12115543	12285329	169787	1	9645	uc010rch.1	-3477	ENSG00000133816	MICAL2	microtubule associated monooxygenase, calponin and LIM domain containing 2	uc010rch.1	9645	0	45683.9	superEnhancer	24803
chr9	75733263	75767909	34647	*	6	7102	45637	6_GES1-WT_peak_41604_lociStitched	Promoter (<=1kb)	9	75766781	75782928	16148	1	301	uc031tee.1	0	ENSG00000135046	ANXA1	annexin A1	uc031tee.1;uc004ajf.1;uc004ajg.1	301;301;301	0;0;0	45637	superEnhancer	24802
chr6	55730428	55749001	18574	*	4	4507	45623.3	4_GES1-WT_peak_35389_lociStitched	Promoter (<=1kb)	6	55620238	55740375	120138	2	653	uc003pcq.3	0	ENSG00000112175	BMP5	bone morphogenetic protein 5	uc003pcq.3;uc011dxf.2	653;653	0;0	45623.3	superEnhancer	24801
chr1	181042256	181082776	40521	*	9	9451	45598.3	9_GES1-WT_peak_3293_lociStitched	Promoter (<=1kb)	1	181057638	181059979	2342	1	51278	uc001got.4	0	ENSG00000162783	IER5	immediate early response 5	uc001got.4	51278	0	45598.3	superEnhancer	24800
chr1	159879806	159895276	15471	*	4	5211	45348.6	4_GES1-WT_peak_2959_lociStitched	Promoter (<=1kb)	1	159887897	159893507	5611	2	8407	uc031pqt.1	0	ENSG00000158710	TAGLN2	transgelin 2	uc001fup.2;uc001fuq.2;uc001fur.2;uc031pqt.1;uc031pqu.1;uc001fun.2;uc010piy.2	57549;57549;57549;8407;8407;8407;8407	6983;20110;20110;0;0;0;0	45348.6	superEnhancer	24799
chr9	131901689	131909206	7518	*	2	3573	45080.9	2_GES1-WT_peak_42709_lociStitched	Promoter (<=1kb)	9	131901736	131905734	3999	1	5524	uc011mbr.1	0	ENSG00000119383	PTPA	protein phosphatase 2 phosphatase activator	uc004bxl.2;uc011mbo.2;uc004bxm.2;uc004bxn.2;uc004bxo.2;uc010myr.2;uc011mbp.2;uc011mbq.1;uc010mys.2;uc011mbr.1;uc004bxp.3;uc004bxq.3	5524;5524;5524;5524;5524;5524;5524;5524;5524;5524;5524;5524	0;0;0;0;0;0;0;0;0;0;0;0	45080.9	superEnhancer	24798
chr5	32682768	32693867	11100	*	4	4309	45029.4	4_GES1-WT_peak_31861_lociStitched	Distal Intergenic	5	32710743	32783713	72971	1	4883	uc010iuo.3	-16876	ENSG00000113389	NPR3	natriuretic peptide receptor 3	NA	NA	NA	45029.4	superEnhancer	24797
chr7	102244099	102261512	17414	*	3	4509	44875.9	3_GES1-WT_peak_38392_lociStitched	Promoter (<=1kb)	7	102220093	102252038	31946	2	10156	uc011kla.2	0	ENSG00000105808	RASA4	RAS p21 protein activator 4	uc011kla.2;uc010lig.3;uc003vae.3;uc003vaf.3;uc011klb.2;uc010lih.2;uc011kld.1	10156;10156;10156;10156;10156;10156;10156	0;0;0;0;0;0;0	44875.9	superEnhancer	24796
chr19	23731296	23738490	7195	*	3	3922	44731.3	3_GES1-WT_peak_20039_lociStitched	Distal Intergenic	19	23835708	23870017	34310	2	171392	uc002nri.3	131527	ENSG00000197372	ZNF675	zinc finger protein 675	NA	NA	NA	44731.3	superEnhancer	24795
chr7	32147708	32157276	9569	*	3	4608	44715	3_GES1-WT_peak_37338_lociStitched	Intron (uc003tco.2/5137, intron 3 of 18)	7	31829247	32111045	281799	2	5137	uc003tcs.3	-36663	ENSG00000154678	PDE1C	phosphodiesterase 1C	uc003tco.2	5137	0	44715	superEnhancer	24794
chr10	63386889	63403112	16224	*	7	5412	44622.5	7_GES1-WT_peak_5461_lociStitched	Distal Intergenic	10	63422719	63526091	103373	1	219621	uc010qik.2	-19607	ENSG00000183346	CABCOCO1	ciliary associated calcium binding coiled-coil 1	NA	NA	NA	44622.5	superEnhancer	24793
chr5	72921232	72936458	15227	*	2	5216	44557.2	2_GES1-WT_peak_32555_lociStitched	Promoter (<=1kb)	5	72921983	73237818	315836	1	64283	uc010izf.3	0	ENSG00000214944	ARHGEF28	Rho guanine nucleotide exchange factor 28	uc010izf.3;uc011csq.2	64283;64283	0;0	44557.2	superEnhancer	24792
chr14	102721649	102748075	26427	*	6	5365	44442.3	6_GES1-WT_peak_13376_lociStitched	5' UTR	14	102695158	102706958	11801	2	5891	uc001yll.4	-14691	ENSG00000080823	MOK	MOK protein kinase	uc001ylm.4;uc001yln.4;uc010txv.3	5891;5891;5891	0;0;0	44442.3	superEnhancer	24791
chr5	10550723	10565495	14773	*	4	4977	44422.4	4_GES1-WT_peak_31707_lociStitched	Promoter (<=1kb)	5	10564435	10657928	93494	1	651746	uc021xwp.1	0	ENSG00000164236	ANKRD33B	ankyrin repeat domain 33B	uc021xwp.1	651746	0	44422.4	superEnhancer	24790
chr6	12572760	12578377	5618	*	4	3725	44405.2	4_GES1-WT_peak_34473_lociStitched	Distal Intergenic	6	12717037	13253337	536301	1	221692	uc011dir.2	-138660	ENSG00000112137	PHACTR1	phosphatase and actin regulator 1	NA	NA	NA	44405.2	superEnhancer	24789
chr10	14507756	14520684	12929	*	3	5984	44201.7	3_GES1-WT_peak_4749_lociStitched	Distal Intergenic	10	14368174	14504143	135970	2	55691	uc001imw.1	-3613	ENSG00000151474	FRMD4A	FERM domain containing 4A	uc001imv.3;uc001imw.1	55691;55691	0;0	44201.7	superEnhancer	24788
chr5	125689098	125722511	33414	*	5	6947	44156.6	5_GES1-WT_peak_33138_lociStitched	Promoter (<=1kb)	5	125695788	125829853	134066	1	65983	uc011cwt.2	0	ENSG00000155324	GRAMD2B	GRAM domain containing 2B	uc011cwt.2;uc011cwu.1	65983;65983	0;0	44156.6	superEnhancer	24787
chr3	197024276	197045094	20819	*	5	6923	44155	5_GES1-WT_peak_29633_lociStitched	Promoter (<=1kb)	3	197025118	197030621	5504	1	100507086	uc003fxq.3	0	ENSG00000227375	DLG1-AS1	DLG1 antisense RNA 1	uc003fxq.3;uc021xju.1;uc003fxn.4;uc003fxo.4;uc011bue.2;uc010ial.3;uc011buf.1;uc003fxp.2;uc010iam.1	100507086;100616216;1739;1739;1739;1739;1739;1739;1739	0;-3457;0;0;0;0;0;0;0	44155	superEnhancer	24786
chr1	210611028	210619964	8937	*	3	3132	44154.1	3_GES1-WT_peak_3822_lociStitched	Promoter (<=1kb)	1	210612927	210849638	236712	1	55733	uc001hia.4	0	ENSG00000054392	HHAT	hedgehog acyltransferase	uc009xcx.3;uc010psq.2;uc001hhz.4;uc009xcy.3;uc010psr.2;uc010pss.2;uc010pst.2;uc021pip.1;uc010psu.2;uc001hia.4	55733;55733;55733;55733;55733;55733;55733;55733;55733;55733	0;0;0;0;0;0;0;0;0;0	44154.1	superEnhancer	24785
chr18	3593081	3606230	13150	*	2	6060	44127.5	2_GES1-WT_peak_18406_lociStitched	Promoter (<=1kb)	18	3594112	3597377	3266	1	649446	uc010wza.3	0	NA	DLGAP1-AS1	DLGAP1 antisense RNA 1	uc010wza.3;uc002kme.2;uc010dkn.3;uc010wyw.2;uc010wyx.2;uc010wyy.2;uc002kmf.3;uc002kmg.3;uc010wyz.2	649446;9229;9229;9229;9229;9229;9229;9229;9229	0;0;0;0;0;0;0;0;0	44127.5	superEnhancer	24784
chr22	46067681	46085755	18075	*	4	5390	44101.2	4_GES1-WT_peak_26871_lociStitched	Promoter (<=1kb)	22	46067917	46241187	173271	1	25814	uc003bgn.2	0	ENSG00000130638	ATXN10	ataxin 10	uc003bgm.2;uc011aqt.2;uc003bgn.2	25814;25814;25814	0;0;0	44101.2	superEnhancer	24783
chr2	87744593	87756425	11833	*	4	4757	44099.2	4_GES1-WT_peak_22199_lociStitched	Promoter (<=1kb)	2	87754974	87821030	66057	1	112597	uc002ssk.4	0	ENSG00000222041	CYTOR	cytoskeleton regulator RNA	uc002ssk.4;uc010fgy.3;uc010fgz.3;uc002srs.4	112597;112597;112597;64795	0;0;0;0	44099.2	superEnhancer	24782
chr7	116065695	116084762	19068	*	3	6627	44083.3	3_GES1-WT_peak_38562_lociStitched	Exon (uc003vhw.2/858, exon 5 of 9)	7	116139655	116148595	8941	1	858	uc003vid.3	-54893	ENSG00000105971	CAV2	caveolin 2	uc010lkd.2;uc010lke.2;uc003vhv.2;uc003vhw.2;uc003vhx.2;uc010lkb.1;uc010lkc.3;uc003vhz.2;uc003via.2;uc003vib.2	857;857;858;858;858;858;858;858;858;858	0;0;0;0;0;0;0;0;0;0	44083.3	superEnhancer	24781
chr2	173912782	173920315	7534	*	4	4149	44068.6	4_GES1-WT_peak_23217_lociStitched	3' UTR	2	173940565	174077527	136963	1	51776	uc002uhx.3	-20250	ENSG00000091436	MAP3K20	mitogen-activated protein kinase kinase kinase 20	uc002uhv.4;uc002uhw.4	11069;11069	0;0	44068.6	superEnhancer	24780
chr1	151161994	151172422	10429	*	4	4764	44052.1	4_GES1-WT_peak_2732_lociStitched	Promoter (<=1kb)	1	151148776	151162689	13914	2	6944	uc001exe.2	0	ENSG00000163159	VPS72	vacuolar protein sorting 72 homolog	uc001exe.2;uc031pot.1;uc031pou.1;uc001exf.2;uc021oyo.1;uc001exi.3;uc001exj.3;uc001exk.3;uc010pcu.2	6944;6944;6944;6944;8394;8394;8394;8394;8394	0;0;0;0;0;0;0;0;0	44052.1	superEnhancer	24779
chr20	52225932	52240548	14617	*	2	6517	44011.8	2_GES1-WT_peak_25314_lociStitched	Distal Intergenic	20	52192266	52210801	18536	2	7764	uc010gij.1	-15131	ENSG00000171940	ZNF217	zinc finger protein 217	NA	NA	NA	44011.8	superEnhancer	24778
chr16	87886843	87905244	18402	*	6	4808	43984.5	6_GES1-WT_peak_16334_lociStitched	Promoter (<=1kb)	16	87863629	87903100	39472	2	8140	uc002fkm.3	0	ENSG00000103257	SLC7A5	solute carrier family 7 member 5	uc002fkm.3	8140	0	43984.5	superEnhancer	24777
chr2	47292603	47316647	24045	*	6	6201	43932.6	6_GES1-WT_peak_21659_lociStitched	3' UTR	2	47314130	47382517	68388	2	285051	uc010yog.2	65870	ENSG00000239605	STPG4	sperm-tail PG-rich repeat containing 4	uc010fbd.3;uc010yog.2;uc002rvm.3;uc002rvo.3;uc010fbb.3;uc010fbc.3;uc002rvp.3;uc002rvq.3;uc002rvr.3	285051;285051;57217;57217;57217;57217;57217;57217;57217	0;0;0;0;0;0;0;0;0	43932.6	superEnhancer	24776
chr1	162507540	162512518	4979	*	3	3483	43921.3	3_GES1-WT_peak_3023_lociStitched	Distal Intergenic	1	162531296	162569633	38338	1	6675	uc001gce.4	-18778	ENSG00000117143	UAP1	UDP-N-acetylglucosamine pyrophosphorylase 1	NA	NA	NA	43921.3	superEnhancer	24775
chr3	187980312	187989296	8985	*	4	2994	43907.9	4_GES1-WT_peak_29432_lociStitched	Intron (uc011bsg.2/4026, intron 1 of 9)	3	187943193	188608460	665268	1	4026	uc011bsi.2	37119	ENSG00000145012	LPP	LIM domain containing preferred translocation partner in lipoma	uc011bsg.2;uc003frs.2;uc011bsi.2	4026;4026;4026	0;0;0	43907.9	superEnhancer	24774
chr17	37008896	37037867	28972	*	6	7108	43866.5	6_GES1-WT_peak_17156_lociStitched	Promoter (<=1kb)	17	37026112	37055453	29342	1	3927	uc010wdy.1	0	ENSG00000002834	LASP1	LIM and SH3 protein 1	uc010wdy.1;uc002hra.3;uc010cvq.3;uc010wdz.2;uc002hqz.1;uc002hqx.1;uc002hqy.1	3927;3927;3927;3927;619505;9349;9349	0;0;0;0;0;0;0	43866.5	superEnhancer	24773
chr1	90350175	90384833	34659	*	9	6629	43812.4	9_GES1-WT_peak_1960_lociStitched	Intron (uc001dnm.3/55144, intron 2 of 2)	1	90287480	90401989	114510	1	55144	uc001dnn.3	62695	ENSG00000171492	LRRC8D	leucine rich repeat containing 8 VRAC subunit D	uc001dnm.3;uc001dnn.3	55144;55144	0;0	43812.4	superEnhancer	24772
chr15	101252565	101274599	22035	*	3	6671	43765.9	3_GES1-WT_peak_14925_lociStitched	Distal Intergenic	15	101142755	101191904	49150	1	140460	uc002bwk.3	109810	ENSG00000183475	ASB7	ankyrin repeat and SOCS box containing 7	NA	NA	NA	43765.9	superEnhancer	24771
chr12	125389577	125425748	36172	*	6	8155	43594.5	6_GES1-WT_peak_10961_lociStitched	Promoter (<=1kb)	12	125400093	125400205	113	1	100847004	uc031qkf.1	0	ENSG00000265345	MIR5188	microRNA 5188	uc031qkf.1;uc001ugs.4;uc001ugt.3;uc001ugv.3;uc001ugw.4;uc009zyf.1	100847004;7316;7316;7316;7316;7316	0;0;0;0;0;0	43594.5	superEnhancer	24770
chr2	47402721	47436582	33862	*	6	6712	43556.7	6_GES1-WT_peak_21666_lociStitched	Promoter (<=1kb)	2	47293080	47403740	110661	2	285051	uc010fbd.3	0	ENSG00000239605	STPG4	sperm-tail PG-rich repeat containing 4	uc010fbd.3;uc002rvt.2	285051;805	0;0	43556.7	superEnhancer	24769
chr14	73104217	73146028	41812	*	8	8025	43501.2	8_GES1-WT_peak_12959_lociStitched	3' UTR	14	73128568	73190813	62246	2	8110	uc001xnd.1	44785	ENSG00000205683	DPF3	double PHD fingers 3	uc001xnc.2;uc001xnd.1;uc001xnf.2;uc010ari.1;uc010ttq.1	8110;8110;8110;8110;8110	0;0;0;0;0	43501.2	superEnhancer	24768
chr1	218831973	218849058	17086	*	3	4666	43459.9	3_GES1-WT_peak_3956_lociStitched	Distal Intergenic	1	218517538	218519020	1483	2	728463	uc031psd.1	-312953	ENSG00000232480	TGFB2-AS1	TGFB2 antisense RNA 1 (head to head)	NA	NA	NA	43459.9	superEnhancer	24767
chr11	106238629	106271165	32537	*	5	7873	43427.1	5_GES1-WT_peak_8364_lociStitched	Distal Intergenic	11	105961277	105969419	8143	1	60496	uc001pjd.1	277352	ENSG00000149313	AASDHPPT	aminoadipate-semialdehyde dehydrogenase-phosphopantetheinyl transferase	NA	NA	NA	43427.1	superEnhancer	24766
chr20	8994825	9016652	21828	*	4	4876	43322	4_GES1-WT_peak_24524_lociStitched	Distal Intergenic	20	9049701	9438136	388436	1	5332	uc010gbw.1	-33049	ENSG00000101333	PLCB4	phospholipase C beta 4	NA	NA	NA	43322	superEnhancer	24765
chr6	52397710	52417510	19801	*	5	6204	43290.9	5_GES1-WT_peak_35317_lociStitched	Exon (uc003paq.3/9697, exon 2 of 11)	6	52362200	52441862	79663	2	9697	uc003paq.3	24352	ENSG00000065308	TRAM2	translocation associated membrane protein 2	uc003paq.3	9697	0	43290.9	superEnhancer	24764
chr12	79939458	79954556	15099	*	3	3715	43101.6	3_GES1-WT_peak_10162_lociStitched	Distal Intergenic	12	79813037	79813101	65	1	100302136	uc021ray.1	126421	ENSG00000221788	MIR1252	microRNA 1252	NA	NA	NA	43101.6	superEnhancer	24763
chr5	151118755	151122060	3306	*	1	3307	43031.2	1_GES1-WT_peak_33682_lociStitched	Distal Intergenic	5	151122383	151138210	15828	2	475	uc003luk.3	16150	ENSG00000177556	ATOX1	antioxidant 1 copper chaperone	uc003luk.3	475	0	43031.2	superEnhancer	24762
chr17	64538013	64546992	8980	*	2	4718	42997.1	2_GES1-WT_peak_17903_lociStitched	Intron (uc002jfo.1/5578, intron 3 of 14)	17	64783190	64783286	97	1	693219	uc021ubx.1	-236198	ENSG00000207943	MIR634	microRNA 634	uc002jfo.1;uc002jfp.1	5578;5578	0;0	42997.1	superEnhancer	24761
chr5	43057778	43079131	21354	*	4	5120	42930.1	4_GES1-WT_peak_32101_lociStitched	Promoter (<=1kb)	5	43065289	43067073	1785	2	100132356	uc021xyg.1	0	NA	LOC100132356	uncharacterized LOC100132356	uc021xyg.1;uc010ivk.4	100132356;100506639	0;0	42930.1	superEnhancer	24760
chr1	214618463	214651089	32627	*	5	6482	42731.6	5_GES1-WT_peak_3890_lociStitched	Promoter (<=1kb)	1	214522039	214638300	116262	2	5784	uc021piy.1	0	ENSG00000152104	PTPN14	protein tyrosine phosphatase non-receptor type 14	uc021piy.1;uc001hkk.2;uc010pty.2	5784;5784;5784	0;0;0	42731.6	superEnhancer	24759
chr5	75984319	76012620	28302	*	4	6073	42580.4	4_GES1-WT_peak_32619_lociStitched	Promoter (<=1kb)	5	76008228	76008713	486	1	100302746	uc021yaq.2	0	NA	NCRUPAR	non-protein coding RNA, upstream of F2R/PAR1	uc021yaq.2;uc003kek.3;uc011csv.2;uc003kel.3;uc010izw.1;uc003ken.4	100302746;10788;10788;10788;10788;2149	0;0;0;0;0;0	42580.4	superEnhancer	24758
chr2	47074714	47101605	26892	*	7	7064	42575.4	7_GES1-WT_peak_21643_lociStitched	Promoter (1-2kb)	2	47073015	47086145	13131	1	100134259	uc002rvj.1	1699	ENSG00000239332	LINC01119	long intergenic non-protein coding RNA 1119	uc002rvi.3;uc002rvj.1	100134259;100134259	0;0	42575.4	superEnhancer	24757
chr7	78911196	78923544	12349	*	4	4535	42562.1	4_GES1-WT_peak_38021_lociStitched	Intron (uc003ugx.3/9863, intron 1 of 21)	7	79082273	79100524	18252	1	100505881	uc022agq.1	-158729	ENSG00000234456	MAGI2-AS3	MAGI2 antisense RNA 3	uc003ugx.3;uc003ugy.3	9863;9863	0;0	42562.1	superEnhancer	24756
chr10	42527825	42546301	18477	*	9	3931	42380.7	9_GES1-WT_peak_5195_lociStitched	Distal Intergenic	10	42827314	42863493	36180	2	441666	uc010qey.2	317192	ENSG00000215146	LOC441666	zinc finger protein 91 pseudogene	NA	NA	NA	42380.7	superEnhancer	24755
chr5	178685507	178704189	18683	*	3	5932	42378.6	3_GES1-WT_peak_34168_lociStitched	Exon (uc003mjw.3/9509, exon 3 of 22)	5	178537852	178772431	234580	2	9509	uc003mjw.3	68242	ENSG00000087116	ADAMTS2	ADAM metallopeptidase with thrombospondin type 1 motif 2	uc003mjw.3;uc011dgm.2	9509;9509	0;0	42378.6	superEnhancer	24754
chr2	202013239	202023257	10019	*	2	4073	42344.3	2_GES1-WT_peak_23590_lociStitched	Promoter (<=1kb)	2	202005012	202022515	17504	2	65072	uc002uxh.1	0	ENSG00000226312	CFLAR-AS1	CFLAR antisense RNA 1	uc002uxh.1;uc002uxb.4;uc002uxc.4;uc010zhk.2;uc010zhl.2;uc010fsw.3;uc002uxd.4;uc021vuw.1;uc002uxf.3;uc010fsx.3;uc010fsy.3;uc010zhm.2;uc010fsz.3;uc002uxg.3	65072;8837;8837;8837;8837;8837;8837;8837;8837;8837;8837;8837;8837;8837	0;0;0;0;0;0;0;0;0;0;0;0;0;0	42344.3	superEnhancer	24753
chr8	43820990	43838875	17886	*	9	3381	42261	9_GES1-WT_peak_39784_lociStitched	Distal Intergenic	8	43147585	43218328	70744	1	340441	uc003xqa.1	673405	ENSG00000188877	POTEA	POTE ankyrin domain family member A	NA	NA	NA	42261	superEnhancer	24752
chr20	30175531	30193873	18343	*	6	6249	42188.9	6_GES1-WT_peak_24784_lociStitched	Promoter (<=1kb)	20	30193086	30194317	1232	1	3397	uc002wwg.2	0	ENSG00000125968	ID1	inhibitor of DNA binding 1, HLH protein	uc021wbt.1;uc002wwg.2;uc002wwh.2	100422904;3397;3397	-1116;0;0	42188.9	superEnhancer	24751
chr1	156697877	156721421	23545	*	7	5728	42103.2	7_GES1-WT_peak_2919_lociStitched	Promoter (<=1kb)	1	156711899	156721085	9187	2	3068	uc009wsd.3	0	ENSG00000143321	HDGF	heparin binding growth factor	uc009wsd.3;uc001fpy.4;uc001fpz.4;uc009wse.3;uc010phr.2;uc009wsf.3;uc001fpu.3;uc001fpv.3;uc001fpw.1;uc001fpx.1;uc001fps.1;uc001fpt.1	3068;3068;3068;3068;3068;3068;51093;51093;79590;79590;81875;81875	0;0;0;0;0;0;0;0;0;0;-172;0	42103.2	superEnhancer	24750
chr3	159479779	159516735	36957	*	6	7069	42053.4	6_GES1-WT_peak_29086_lociStitched	Promoter (<=1kb)	3	159481930	159612500	130571	1	100505385	uc010hvz.1	0	ENSG00000283154	IQCJ-SCHIP1	IQCJ-SCHIP1 readthrough	uc003fcq.2;uc003fcr.2;uc010hvz.1;uc003fcs.2;uc003fct.2;uc021xgm.1	100505385;100505385;100505385;29970;29970;29970	0;0;0;0;0;0	42053.4	superEnhancer	24749
chr5	35902159	35925084	22926	*	6	4912	41979.8	6_GES1-WT_peak_31972_lociStitched	3' UTR	5	35904398	35938737	34340	2	133690	uc003jjt.1	13653	ENSG00000152611	CAPSL	calcyphosine like	uc003jjt.1;uc003jju.1	133690;133690	0;0	41979.8	superEnhancer	24748
chr6	139889366	139920027	30662	*	4	7862	41951.7	4_GES1-WT_peak_36255_lociStitched	Distal Intergenic	6	139790132	139795733	5602	2	645434	uc003qiq.1	-93633	ENSG00000238099	LINC01625	long intergenic non-protein coding RNA 1625	NA	NA	NA	41951.7	superEnhancer	24747
chr5	143292515	143303523	11009	*	3	4095	41839.7	3_GES1-WT_peak_33513_lociStitched	Distal Intergenic	5	143191726	143200284	8559	1	57824	uc003lnj.3	100789	ENSG00000158497	HMHB1	histocompatibility minor HB-1	NA	NA	NA	41839.7	superEnhancer	24746
chr6	142694601	142706595	11995	*	4	4563	41703	4_GES1-WT_peak_36331_lociStitched	Exon (uc010khc.3/57211, exon 5 of 26)	6	142738246	142767403	29158	1	57211	uc011edv.2	-31651	ENSG00000112414	ADGRG6	adhesion G protein-coupled receptor G6	uc003qix.2;uc010khc.3;uc010khd.3;uc010khe.3;uc010khf.3	57211;57211;57211;57211;57211	0;0;0;0;0	41703	superEnhancer	24745
chr17	76310113	76356877	46765	*	11	9692	41620.8	11_GES1-WT_peak_18173_lociStitched	Promoter (<=1kb)	17	76352859	76356158	3300	2	9021	uc002jvl.2	0	ENSG00000184557	SOCS3	suppressor of cytokine signaling 3	uc002jvl.2	9021	0	41620.8	superEnhancer	24744
chr17	571520	598619	27100	*	6	6098	41490.1	6_GES1-WT_peak_16423_lociStitched	Promoter (<=1kb)	17	411908	579647	167740	2	55275	uc002frk.3	0	ENSG00000141252	VPS53	VPS53 subunit of GARP complex	uc002frk.3;uc010cjo.2;uc002frl.2;uc002frm.2;uc002frn.2;uc002fro.2;uc010cjp.1	55275;55275;55275;55275;55275;55275;55275	0;0;0;0;0;0;0	41490.1	superEnhancer	24743
chr17	40670099	40689037	18939	*	3	4936	41425.3	3_GES1-WT_peak_17325_lociStitched	Promoter (<=1kb)	17	40687951	40696466	8516	1	4669	uc002hzv.3	0	ENSG00000108784	NAGLU	N-acetyl-alpha-glucosaminidase	uc031rak.1;uc002hzv.3;uc002hzq.3;uc002hzr.3;uc002hzs.3;uc010cyg.3;uc010wgj.2;uc010wgk.2;uc010wgl.2;uc002hzt.3;uc002hzu.3	100847046;4669;535;535;535;535;535;535;535;535;535	3893;0;0;0;0;0;0;0;0;0;0	41425.3	superEnhancer	24742
chr20	47950857	47963384	12528	*	2	2929	41425.1	2_GES1-WT_peak_25175_lociStitched	Distal Intergenic	20	47897220	47897309	90	1	692057	uc002xup.1	53637	ENSG00000212304	SNORD12	small nucleolar RNA, C/D box 12	NA	NA	NA	41425.1	superEnhancer	24741
chr9	127572723	127581828	9106	*	3	4027	41203.7	3_GES1-WT_peak_42561_lociStitched	3' UTR	9	127563153	127577159	14007	1	169611	uc004bow.3	9570	ENSG00000185585	OLFML2A	olfactomedin like 2A	uc004bov.3;uc004bow.3	169611;169611	0;0	41203.7	superEnhancer	24740
chr17	43224436	43250907	26472	*	4	5843	41111	4_GES1-WT_peak_17441_lociStitched	Promoter (<=1kb)	17	43224684	43229468	4785	1	10614	uc002iig.3	0	ENSG00000186834	HEXIM1	HEXIM P-TEFb complex subunit 1	uc002iig.3;uc002iih.1;uc010daf.1;uc002iii.1;uc002iij.1;uc010wjj.2;uc002iid.2;uc002iic.3;uc002iie.3;uc002iif.3;uc010dae.3	10614;124790;124790;124790;124790;79777;79777;79777;79777;79777;79777	0;0;0;0;0;0;11422;11422;11422;11422;11422	41111	superEnhancer	24739
chr1	231524016	231558976	34961	*	4	7703	41065.2	4_GES1-WT_peak_4174_lociStitched	Promoter (<=1kb)	1	231499497	231556057	56561	2	54583	uc001huu.3	0	ENSG00000135766	EGLN1	egl-9 family hypoxia inducible factor 1	uc001huu.3;uc001huv.2	54583;54583	0;0	41065.2	superEnhancer	24738
chr2	188406060	188419348	13289	*	5	4618	40855.7	5_GES1-WT_peak_23361_lociStitched	Promoter (<=1kb)	2	188328958	188419219	90262	2	7035	uc002upy.3	0	ENSG00000003436	TFPI	tissue factor pathway inhibitor	uc002upy.3;uc002uqa.2;uc002uqb.2	7035;7035;7035	0;0;0	40855.7	superEnhancer	24737
chr7	46573831	46609354	35524	*	5	7403	40838.4	5_GES1-WT_peak_37609_lociStitched	Distal Intergenic	7	45951844	45960871	9028	2	3486	uc003tnt.3	-612960	ENSG00000146674	IGFBP3	insulin like growth factor binding protein 3	NA	NA	NA	40838.4	superEnhancer	24736
chr2	208118097	208124148	6052	*	3	3334	40746.3	3_GES1-WT_peak_23697_lociStitched	Distal Intergenic	2	207938862	208031970	93109	2	8609	uc031rrb.1	-86127	ENSG00000118263	KLF7	Kruppel like factor 7	NA	NA	NA	40746.3	superEnhancer	24735
chr5	167715705	167770522	54818	*	12	10223	40642.1	12_GES1-WT_peak_33904_lociStitched	Promoter (<=1kb)	5	167719065	167899308	180244	1	23286	uc003lzu.3	0	ENSG00000113645	WWC1	WW and C2 domain containing 1	uc003lzu.3;uc003lzv.3;uc011den.2	23286;23286;23286	0;0;0	40642.1	superEnhancer	24734
chr11	34997021	35000886	3866	*	2	3312	40603.4	2_GES1-WT_peak_7272_lociStitched	Exon (uc001mvt.3/8050, exon 8 of 11)	11	34963384	34963467	84	1	100616437	uc021qfv.1	33637	ENSG00000251862	MIR1343	microRNA 1343	uc001mvt.3;uc010rep.2;uc010req.2	8050;8050;8050	0;0;0	40603.4	superEnhancer	24733
chr17	15848190	15870181	21992	*	7	5696	40586.2	7_GES1-WT_peak_16758_lociStitched	Promoter (<=1kb)	17	15848231	15879210	30980	1	136	uc002gpd.1	0	ENSG00000170425	ADORA2B	adenosine A2b receptor	uc002gpd.1	136	0	40586.2	superEnhancer	24732
chr11	67771150	67808350	37201	*	9	8276	40571.4	9_GES1-WT_peak_7788_lociStitched	Promoter (<=1kb)	11	67801364	67801448	85	1	100616403	uc021qml.1	0	ENSG00000284435	MIR4691	microRNA 4691	uc021qml.1;uc001ond.2;uc001one.3;uc001onf.1;uc001ong.3;uc010rpy.2;uc001omy.1;uc001omz.3;uc001ona.3;uc001onb.3;uc010rpz.2;uc001onc.3;uc009ysb.2;uc001omw.1	100616403;10312;10312;10312;10312;221;221;221;221;221;4728;4728;4728;81622	0;0;0;0;-2063;0;0;0;0;0;0;0;0;0	40571.4	superEnhancer	24731
chr8	89951500	89955600	4101	*	1	4102	40531	1_GES1-WT_peak_40119_lociStitched	Distal Intergenic	8	89049460	89339717	290258	2	4325	uc003yeb.4	-611783	ENSG00000156103	MMP16	matrix metallopeptidase 16	NA	NA	NA	40531	superEnhancer	24730
chr10	10827035	10848167	21133	*	4	6110	40499.3	4_GES1-WT_peak_4664_lociStitched	Promoter (<=1kb)	10	10826402	10836877	10476	2	207107	uc001ikf.1	0	ENSG00000225383	SFTA1P	surfactant associated 1, lncRNA	uc001ikf.1	207107	0	40499.3	superEnhancer	24729
chr13	114598886	114611999	13114	*	3	4949	40427.8	3_GES1-WT_peak_12056_lociStitched	Exon (uc031qnp.1/uc031qnp.1, exon 2 of 8)	13	114629487	114631964	2478	2	100861555	uc031qnq.1	19965	NA	LINC00565	long intergenic non-protein coding RNA 565	NA	NA	NA	40427.8	superEnhancer	24728
chr7	99149068	99162020	12953	*	3	4701	40382.3	3_GES1-WT_peak_38272_lociStitched	Promoter (<=1kb)	7	99143923	99149757	5835	2	221786	uc003ura.3	0	ENSG00000221909	FAM200A	family with sequence similarity 200 member A	uc003ura.3;uc003urb.3;uc003urc.3;uc003ure.3;uc010lfz.3;uc003urh.3;uc010lga.3;uc003uri.3;uc010lgb.3;uc003urj.3;uc010lgc.3	221786;221786;79027;79027;79027;79027;79027;79027;79027;79027;79027	0;0;0;0;0;0;0;0;0;0;0	40382.3	superEnhancer	24727
chr5	145303891	145327056	23166	*	4	6089	40364.4	4_GES1-WT_peak_33540_lociStitched	Promoter (<=1kb)	5	145316126	145442879	126754	1	153769	uc003lnt.3	0	ENSG00000156463	SH3RF2	SH3 domain containing ring finger 2	uc003lnt.3;uc011dbl.1	153769;153769	0;0	40364.4	superEnhancer	24726
chr5	139015638	139048655	33018	*	5	7020	40232.4	5_GES1-WT_peak_33392_lociStitched	Promoter (<=1kb)	5	139028301	139062680	34380	1	51523	uc010jfg.1	0	ENSG00000171604	CXXC5	CXXC finger protein 5	uc010jfg.1;uc003let.2	51523;51523	0;0	40232.4	superEnhancer	24725
chr1	159566532	159569111	2580	*	2	2203	40117.7	2_GES1-WT_peak_2952_lociStitched	Distal Intergenic	1	159557616	159558661	1046	1	325	uc001ftv.3	8916	ENSG00000132703	APCS	amyloid P component, serum	NA	NA	NA	40117.7	superEnhancer	24724
chr6	155405346	155449128	43783	*	6	9436	40092.1	6_GES1-WT_peak_36532_lociStitched	Promoter (<=1kb)	6	155411423	155578857	167435	1	26230	uc003qqe.3	0	ENSG00000146426	TIAM2	TIAM Rac1 associated GEF 2	uc003qqb.3;uc003qqe.3	26230;26230	0;0	40092.1	superEnhancer	24723
chr14	51124542	51145282	20741	*	4	6317	40082	4_GES1-WT_peak_12521_lociStitched	Promoter (<=1kb)	14	51100298	51135071	34774	2	60485	uc001wyh.2	0	ENSG00000151748	SAV1	salvador family WW domain containing protein 1	uc001wyh.2;uc021rsy.2	60485;60485	0;0	40082	superEnhancer	24722
chr2	85107494	85148001	40508	*	7	9505	40009.8	7_GES1-WT_peak_22125_lociStitched	Promoter (<=1kb)	2	85048791	85108369	59579	2	129293	uc002sou.5	0	ENSG00000186854	TRABD2A	TraB domain containing 2A	uc002sou.5;uc010ysl.3;uc010fgc.3;uc002sow.1	129293;129293;129293;9168	0;0;0;0	40009.8	superEnhancer	24721
chr18	3622508	3626082	3575	*	1	3576	40005.7	1_GES1-WT_peak_18408_lociStitched	Intron (uc002kme.2/9229, intron 4 of 9)	18	3594112	3597377	3266	1	649446	uc010wza.3	28396	NA	DLGAP1-AS1	DLGAP1 antisense RNA 1	uc002kme.2;uc010dkn.3;uc010wyw.2;uc010wyx.2;uc010wyy.2;uc002kmf.3;uc002kmg.3;uc010wyz.2	9229;9229;9229;9229;9229;9229;9229;9229	0;0;0;0;0;0;0;0	40005.7	superEnhancer	24720
chr3	112389420	112418648	29229	*	7	6570	39988.2	7_GES1-WT_peak_28321_lociStitched	Distal Intergenic	3	112326013	112359977	33965	2	151887	uc003dzh.1	-29443	ENSG00000091986	CCDC80	coiled-coil domain containing 80	NA	NA	NA	39988.2	superEnhancer	24719
chr9	133700206	133736689	36484	*	5	7772	39979.2	5_GES1-WT_peak_42787_lociStitched	Promoter (<=1kb)	9	133710831	133763062	52232	1	25	uc004bzw.3	0	ENSG00000097007	ABL1	ABL proto-oncogene 1, non-receptor tyrosine kinase	uc004bzv.3;uc004bzw.3	25;25	0;0	39979.2	superEnhancer	24718
chr4	123684611	123706003	21393	*	4	5540	39945	4_GES1-WT_peak_30773_lociStitched	Distal Intergenic	4	123653857	123666098	12242	1	166379	uc021xrm.1	30754	ENSG00000181004	BBS12	Bardet-Biedl syndrome 12	NA	NA	NA	39945	superEnhancer	24717
chr20	52195648	52211823	16176	*	4	4211	39917.5	4_GES1-WT_peak_25309_lociStitched	Promoter (<=1kb)	20	52183610	52199707	16098	2	7764	uc002xwq.4	0	ENSG00000171940	ZNF217	zinc finger protein 217	uc002xwq.4;uc010gij.1	7764;7764	0;0	39917.5	superEnhancer	24716
chr4	147162164	147178718	16555	*	5	5059	39890.9	5_GES1-WT_peak_31016_lociStitched	3' UTR	4	147096881	147111213	14333	1	11157	uc003ikp.4	65283	ENSG00000164167	LSM6	LSM6 homolog, U6 small nuclear RNA and mRNA degradation associated	uc003ikr.2;uc003iks.2;uc010ioz.2;uc010ipa.2	84068;84068;84068;84068	0;0;0;0	39890.9	superEnhancer	24715
chr11	114224401	114249306	24906	*	5	6015	39804.8	5_GES1-WT_peak_8503_lociStitched	Distal Intergenic	11	114262170	114271272	9103	2	54494	uc001pot.2	21966	ENSG00000180425	C11orf71	chromosome 11 open reading frame 71	NA	NA	NA	39804.8	superEnhancer	24714
chr12	105647373	105652216	4844	*	2	3966	39797.8	2_GES1-WT_peak_10519_lociStitched	Distal Intergenic	12	105567075	105630008	62934	2	55198	uc010swu.1	-17365	ENSG00000136044	APPL2	adaptor protein, phosphotyrosine interacting with PH domain and leucine zipper 2	NA	NA	NA	39797.8	superEnhancer	24713
chr4	67419845	67441633	21789	*	5	7754	39769.3	5_GES1-WT_peak_30310_lociStitched	Distal Intergenic	4	66535679	66559104	23426	1	100144602	uc003hdb.3	884166	ENSG00000250846	EPHA5-AS1	EPHA5 antisense RNA 1	NA	NA	NA	39769.3	superEnhancer	24712
chr22	36720844	36728703	7860	*	3	4005	39736.2	3_GES1-WT_peak_26576_lociStitched	3' UTR	22	36696173	36737848	41676	2	4627	uc003aph.1	9145	ENSG00000100345	MYH9	myosin heavy chain 9	uc003apg.3;uc003aph.1;uc003api.1	4627;4627;4627	0;0;0	39736.2	superEnhancer	24711
chr3	123396795	123454133	57339	*	9	9381	39713	9_GES1-WT_peak_28458_lociStitched	Promoter (<=1kb)	3	123331143	123411226	80084	2	4638	uc011bjv.2	0	ENSG00000065534	MYLK	myosin light chain kinase	uc011bjv.2;uc011bjw.2;uc003ego.3;uc003egp.3;uc003egq.3;uc003egr.3;uc003egs.3;uc003egt.3;uc010hrs.1	4638;4638;4638;4638;4638;4638;4638;4638;4638	0;0;0;0;0;0;0;0;0	39713	superEnhancer	24710
chr9	26229311	26245856	16546	*	2	4109	39659.1	2_GES1-WT_peak_41191_lociStitched	Distal Intergenic	9	26066673	26118406	51734	1	100506422	uc022beu.1	162638	ENSG00000276759	LOC100506422	putative deoxyuridine 5'-triphosphate nucleotidohydrolase-like protein FLJ16323	NA	NA	NA	39659.1	superEnhancer	24709
chr2	105992503	106026958	34456	*	8	8962	39634.7	8_GES1-WT_peak_22401_lociStitched	Promoter (<=1kb)	2	105977283	106015575	38293	2	2274	uc002tcv.3	0	ENSG00000115641	FHL2	four and a half LIM domains 2	uc002tcv.3;uc002tcw.3;uc002tcx.3;uc002tcy.3;uc002tcz.3;uc002tda.3;uc002tdb.3;uc002tdc.3;uc002tdd.3;uc002tde.1	2274;2274;2274;2274;2274;2274;2274;2274;2274;2274	0;0;0;0;0;0;0;0;0;0	39634.7	superEnhancer	24708
chrX	119681939	119695306	13368	*	3	4369	39626.8	3_GES1-WT_peak_44008_lociStitched	Promoter (<=1kb)	23	119658446	119694817	36372	2	8450	uc004esv.3	0	ENSG00000158290	CUL4B	cullin 4B	uc010nqq.3;uc004esv.3;uc004esw.3	8450;8450;8450	-1468;0;0	39626.8	superEnhancer	24707
chr1	41940206	41964517	24312	*	5	5160	39553.2	5_GES1-WT_peak_1222_lociStitched	Promoter (<=1kb)	1	41944446	41949874	5429	2	1907	uc001cgu.3	0	ENSG00000127129	EDN2	endothelin 2	uc001cgu.3;uc001cgv.3;uc001cgw.3;uc009vwh.3;uc009vwi.3;uc009vwj.3;uc001cgx.3	1907;1907;1907;1907;1907;1907;1907	0;0;0;0;0;0;0	39553.2	superEnhancer	24706
chr9	113504800	113515913	11114	*	4	5027	39469.1	4_GES1-WT_peak_42212_lociStitched	Exon (uc004bez.2/4593, exon 8 of 14)	9	113431051	113563278	132228	1	4593	uc022blv.1	73749	ENSG00000030304	MUSK	muscle associated receptor tyrosine kinase	uc004bez.2;uc022blt.1;uc022blu.1;uc022blv.1	4593;4593;4593;4593	0;0;0;0	39469.1	superEnhancer	24705
chr11	86184659	86236503	51845	*	10	8730	39459.2	10_GES1-WT_peak_8088_lociStitched	Exon (uc001pbz.3/10873, exon 4 of 14)	11	86106217	86134151	27935	1	60494	uc010rtq.2	78442	ENSG00000149201	CCDC81	coiled-coil domain containing 81	uc001pbz.3;uc001pca.3;uc009yvk.3;uc010rtr.1	10873;10873;10873;10873	0;0;0;0	39459.2	superEnhancer	24704
chr9	81961104	81977637	16534	*	4	6709	39441.9	4_GES1-WT_peak_41703_lociStitched	Distal Intergenic	9	82186878	82341656	154779	1	7091	uc004alc.3	-209241	ENSG00000106829	TLE4	TLE family member 4, transcriptional corepressor	NA	NA	NA	39441.9	superEnhancer	24703
chr2	225955597	225969411	13815	*	4	4683	39382.4	4_GES1-WT_peak_24019_lociStitched	Distal Intergenic	2	225725297	225907330	182034	2	55619	uc002vod.1	-48267	ENSG00000135905	DOCK10	dedicator of cytokinesis 10	NA	NA	NA	39382.4	superEnhancer	24702
chr5	123985856	123998718	12863	*	3	4018	39342.8	3_GES1-WT_peak_33099_lociStitched	Intron (uc003ktq.1/57507, intron 2 of 8)	5	123972610	123980354	7745	2	57507	uc003ktp.1	-5502	ENSG00000168916	ZNF608	zinc finger protein 608	uc003ktq.1;uc003ktr.1;uc003kts.1;uc003ktt.1	57507;57507;57507;57507	0;0;0;0	39342.8	superEnhancer	24701
chr6	37093399	37112949	19551	*	4	5278	39242.8	4_GES1-WT_peak_35033_lociStitched	Distal Intergenic	6	37137922	37143204	5283	1	5292	uc003onk.3	-24973	ENSG00000137193	PIM1	Pim-1 proto-oncogene, serine/threonine kinase	NA	NA	NA	39242.8	superEnhancer	24700
chr8	49319694	49333816	14123	*	4	4762	39187.1	4_GES1-WT_peak_39815_lociStitched	Distal Intergenic	8	49623351	49647870	24520	2	79645	uc003xqn.3	314054	ENSG00000034239	EFCAB1	EF-hand calcium binding domain 1	NA	NA	NA	39187.1	superEnhancer	24699
chr6	140857543	140868823	11281	*	3	4265	39175.5	3_GES1-WT_peak_36292_lociStitched	Distal Intergenic	6	141004951	141005020	70	1	100616180	uc021zge.1	-136128	ENSG00000264390	MIR4465	microRNA 4465	NA	NA	NA	39175.5	superEnhancer	24698
chr9	37984501	38048990	64490	*	8	9961	39074.5	8_GES1-WT_peak_41365_lociStitched	Exon (uc004aax.3/6461, exon 2 of 6)	9	37915895	38069210	153316	2	6461	uc004aax.3	20220	ENSG00000107338	SHB	SH2 domain containing adaptor protein B	uc004aax.3	6461	0	39074.5	superEnhancer	24697
chr5	59168275	59171718	3444	*	2	3107	39018.5	2_GES1-WT_peak_32323_lociStitched	Intron (uc003jsa.2/5144, intron 1 of 14)	5	58264866	59189621	924756	2	5144	uc003jsa.2	17903	ENSG00000113448	PDE4D	phosphodiesterase 4D	uc003jsa.2;uc003jsb.3	5144;5144	0;0	39018.5	superEnhancer	24696
chr12	47663943	47672933	8991	*	2	4771	38948.1	2_GES1-WT_peak_9496_lociStitched	Distal Intergenic	12	47602203	47610226	8024	2	100233209	uc001rpp.2	-53717	ENSG00000247774	PCED1B-AS1	PCED1B antisense RNA 1	NA	NA	NA	38948.1	superEnhancer	24695
chr5	135328719	135373755	45037	*	11	9214	38853.4	11_GES1-WT_peak_33315_lociStitched	Promoter (<=1kb)	5	135364584	135399507	34924	1	7045	uc003lbf.4	0	ENSG00000120708	TGFBI	transforming growth factor beta induced	uc003lbf.4;uc003lbg.4;uc003lbh.4	7045;7045;7045	0;0;0	38853.4	superEnhancer	24694
chr10	116615182	116630439	15258	*	2	4704	38845.3	2_GES1-WT_peak_6444_lociStitched	3' UTR	10	116581503	116659586	78084	1	57700	uc001lcc.3	33679	ENSG00000151553	FHIP2A	FHF complex subunit HOOK interacting protein 2A	uc001lcb.3;uc001lcc.3	57700;57700	0;0	38845.3	superEnhancer	24693
chr3	29724569	29737830	13262	*	2	4802	38662.7	2_GES1-WT_peak_27308_lociStitched	Intron (uc003cek.3/27303, intron 4 of 12)	3	29322803	30051886	729084	1	27303	uc010hfr.3	401766	ENSG00000144642	RBMS3	RNA binding motif single stranded interacting protein 3	uc003cek.3;uc010hfq.3;uc003cel.3;uc003cem.3;uc010hfr.3	27303;27303;27303;27303;27303	0;0;0;0;0	38662.7	superEnhancer	24692
chr1	28831992	28845854	13863	*	3	4712	38640.3	3_GES1-WT_peak_907_lociStitched	Promoter (<=1kb)	1	28832455	28865708	33254	1	1104	uc001bqa.2	0	ENSG00000180198	RCC1	regulator of chromosome condensation 1	uc001bqa.2;uc001bqb.2;uc001bqc.2;uc001bqe.2;uc001bqf.2;uc001bqg.2;uc001bqd.3	1104;1104;1104;1104;1104;1104;8420	0;0;0;0;0;0;0	38640.3	superEnhancer	24691
chr5	169212278	169215947	3670	*	2	3314	38638.5	2_GES1-WT_peak_33945_lociStitched	Intron (uc003maf.3/1794, intron 25 of 51)	5	169130953	169510386	379434	1	1794	uc010jjm.3	81325	ENSG00000134516	DOCK2	dedicator of cytokinesis 2	uc003maf.3;uc011der.2;uc010jjm.3	1794;1794;1794	0;0;0	38638.5	superEnhancer	24690
chr15	67416989	67443652	26664	*	4	6099	38606.8	4_GES1-WT_peak_14227_lociStitched	Promoter (<=1kb)	15	67418054	67487533	69480	1	4088	uc010ujr.2	0	ENSG00000166949	SMAD3	SMAD family member 3	uc002aqj.3;uc010ujr.2;uc010ujs.2	4088;4088;4088	0;0;0	38606.8	superEnhancer	24689
chr7	116139353	116166180	26828	*	4	5879	38605.5	4_GES1-WT_peak_38568_lociStitched	Promoter (<=1kb)	7	116164839	116201239	36401	1	857	uc003vif.2	0	ENSG00000105974	CAV1	caveolin 1	uc010lkd.2;uc010lke.2;uc003vif.2;uc003vig.2;uc003vih.3;uc010lkf.2;uc003vhv.2;uc003vhw.2;uc003vhx.2;uc010lkb.1;uc010lkc.3;uc003vhz.2;uc003via.2;uc003vib.2;uc003vid.3;uc003vie.3;uc022akj.1	857;857;857;857;857;857;858;858;858;858;858;858;858;858;858;858;858	0;0;0;0;0;0;0;0;0;0;0;0;0;0;0;0;0	38605.5	superEnhancer	24688
chr15	72491507	72530656	39150	*	7	5757	38496.2	7_GES1-WT_peak_14370_lociStitched	Promoter (<=1kb)	15	72491370	72495005	3636	2	5315	uc002atr.1	0	ENSG00000067225	PKM	pyruvate kinase M1/2	uc002atq.3;uc010bis.2;uc002atr.1;uc010bit.1;uc002atv.2;uc002atw.2;uc002atx.2;uc002aty.2;uc010uki.2;uc010ukj.2;uc010ukk.2;uc010biu.1;uc002aua.3;uc002aub.3;uc002aud.4;uc002auc.3;uc002auf.1;uc031qsp.1	196996;196996;5315;5315;5315;5315;5315;5315;5315;5315;5315;5315;56965;56965;56965;56965;56965;56965	0;0;0;0;0;0;0;0;0;0;0;0;27676;27676;32789;32972;29356;28507	38496.2	superEnhancer	24687
chr1	43406006	43433858	27853	*	5	6811	38487.3	5_GES1-WT_peak_1260_lociStitched	Promoter (<=1kb)	1	43424720	43449029	24310	1	440584	uc001cil.3	0	ENSG00000227533	SLC2A1-AS1	SLC2A1 antisense RNA 1	uc001cil.3;uc001cik.2	440584;6513	0;0	38487.3	superEnhancer	24686
chr7	55198634	55202320	3687	*	3	2417	38409.3	3_GES1-WT_peak_37718_lociStitched	Intron (uc003tqh.3/1956, intron 1 of 9)	7	55177540	55275031	97492	1	1956	uc011kco.2	21094	ENSG00000146648	EGFR	epidermal growth factor receptor	uc003tqh.3;uc003tqi.3;uc003tqj.3;uc010kzg.2;uc022adm.1;uc003tqk.3;uc022adn.1;uc011kco.2	1956;1956;1956;1956;1956;1956;1956;1956	0;0;0;0;0;0;0;0	38409.3	superEnhancer	24685
chr9	100984441	100995152	10712	*	3	3645	38366.1	3_GES1-WT_peak_42044_lociStitched	Exon (uc004ayq.3/55357, exon 5 of 13)	9	100961280	100975833	14554	2	55357	uc004ayp.4	-8608	ENSG00000095383	TBC1D2	TBC1 domain family member 2	uc004ayq.3;uc004ayr.3;uc011lvb.2	55357;55357;55357	0;0;0	38366.1	superEnhancer	24684
chr6	134741333	134758366	17034	*	5	5447	38333.3	5_GES1-WT_peak_36168_lociStitched	Promoter (<=1kb)	6	134758854	134825158	66305	1	154092	uc003qet.3	-488	ENSG00000236700	LINC01010	long intergenic non-protein coding RNA 1010	uc003qet.3;uc021zfn.1;uc021zfo.1;uc021zfp.1	154092;154092;154092;154092	0;0;0;0	38333.3	superEnhancer	24683
chr6	75892267	75915764	23498	*	5	5271	38327.6	5_GES1-WT_peak_35539_lociStitched	Promoter (<=1kb)	6	75794042	75912543	118502	2	1303	uc021zbv.1	0	ENSG00000111799	COL12A1	collagen type XII alpha 1 chain	uc021zbv.1;uc021zbw.1;uc003phs.3;uc003pht.3;uc003phu.1	1303;1303;1303;1303;1303	0;0;0;0;0	38327.6	superEnhancer	24682
chr17	43370383	43399254	28872	*	7	6043	38324.7	7_GES1-WT_peak_17449_lociStitched	Promoter (<=1kb)	17	43340488	43394414	53927	2	9020	uc002iiw.1	0	ENSG00000006062	MAP3K14	mitogen-activated protein kinase kinase kinase 14	uc002iiv.1;uc002iiw.1	9020;9020	-2043;0	38324.7	superEnhancer	24681
chr4	48331095	48344517	13423	*	5	6382	38201.9	5_GES1-WT_peak_30168_lociStitched	Promoter (<=1kb)	4	48343613	48428215	84603	1	57606	uc003gya.4	0	ENSG00000109171	SLAIN2	SLAIN motif family member 2	uc003gya.4	57606	0	38201.9	superEnhancer	24680
chr18	6623918	6630530	6613	*	3	3653	38110.7	3_GES1-WT_peak_18435_lociStitched	Distal Intergenic	18	6511415	6590652	79238	1	100130480	uc021ugs.1	112503	ENSG00000265944	LINC01387	long intergenic non-protein coding RNA 1387	NA	NA	NA	38110.7	superEnhancer	24679
chr7	5460470	5469317	8848	*	5	3635	38030.5	5_GES1-WT_peak_36852_lociStitched	Promoter (<=1kb)	7	5346423	5463177	116755	2	84629	uc003soi.4	0	ENSG00000182095	TNRC18	trinucleotide repeat containing 18	uc003soi.4;uc003sok.1	84629;84629	0;0	38030.5	superEnhancer	24678
chr7	33939277	33944879	5603	*	3	4121	37968.7	3_GES1-WT_peak_37374_lociStitched	Promoter (<=1kb)	7	33944523	34195484	250962	1	168667	uc011kap.2	0	ENSG00000164619	BMPER	BMP binding endothelial regulator	uc011kap.2	168667	0	37968.7	superEnhancer	24677
chr3	99281168	99283974	2807	*	2	2402	37934.1	2_GES1-WT_peak_28077_lociStitched	Intron (uc021xbq.1/100313938, intron 1 of 1)	3	99357440	99422736	65297	1	1295	uc010hpe.2	-73466	ENSG00000144810	COL8A1	collagen type VIII alpha 1 chain	uc021xbq.1	100313938	0	37934.1	superEnhancer	24676
chr8	38854538	38858660	4123	*	2	3593	37915.9	2_GES1-WT_peak_39697_lociStitched	Promoter (<=1kb)	8	38854505	38962779	108275	1	8754	uc011lcg.2	33	ENSG00000168615	ADAM9	ADAM metallopeptidase domain 9	uc003xmk.3;uc003xml.3;uc003xmm.3;uc003xmn.3;uc003xmp.3;uc003xmr.3;uc010lwr.3;uc011lcf.2;uc011lcg.2	83877;83877;83877;83877;8754;8754;8754;8754;8754	-497;-497;-497;-497;0;0;0;0;0	37915.9	superEnhancer	24675
chr11	95878041	95902723	24683	*	6	7266	37908.2	6_GES1-WT_peak_8232_lociStitched	Intron (uc001pfw.1/84441, intron 1 of 4)	11	96074602	96074690	89	1	100422991	uc021qoz.1	-171879	ENSG00000266192	MIR1260B	microRNA 1260b	uc001pfw.1	84441	0	37908.2	superEnhancer	24674
chr10	23620519	23641566	21048	*	4	6583	37875.9	4_GES1-WT_peak_4902_lociStitched	Promoter (<=1kb)	10	23605520	23633772	28253	2	256815	uc010qcx.2	0	ENSG00000179133	C10orf67	chromosome 10 open reading frame 67	uc010qcx.2	256815	0	37875.9	superEnhancer	24673
chr10	79049786	79062155	12370	*	2	4520	37827.5	2_GES1-WT_peak_5798_lociStitched	Intron (uc001jxj.2/3778, intron 2 of 28)	10	78637358	79110519	473162	2	3778	uc009xrt.1	48364	ENSG00000156113	KCNMA1	potassium calcium-activated channel subfamily M alpha 1	uc001jxj.2;uc021ptu.1;uc009xrt.1;uc001jxm.3;uc001jxn.3;uc001jxo.3;uc001jxq.3	3778;3778;3778;3778;3778;3778;3778	0;0;0;0;0;0;0	37827.5	superEnhancer	24672
chr16	3070355	3073259	2905	*	2	2603	37766.2	2_GES1-WT_peak_15077_lociStitched	Promoter (<=1kb)	16	3070391	3072383	1993	1	51330	uc031quu.1	0	ENSG00000006327	TNFRSF12A	TNF receptor superfamily member 12A	uc002cte.4;uc002ctf.4;uc002csv.4;uc002csw.4;uc031quu.1;uc002csx.1;uc002csy.1;uc002csz.1;uc002ctb.2;uc002ctd.2;uc002cta.2;uc002csu.4	146439;146439;51330;51330;51330;54985;54985;54985;79228;79228;79228;9074	9744;12283;0;0;0;0;0;0;-773;-773;-783;-2167	37766.2	superEnhancer	24671
chr9	37464411	37487279	22869	*	3	6601	37749.9	3_GES1-WT_peak_41345_lociStitched	Promoter (<=1kb)	9	37485945	37495983	10039	1	64425	uc011lqj.1	0	ENSG00000137054	POLR1E	RNA polymerase I subunit E	uc011lqj.1;uc003zzy.1;uc011lqk.1;uc003zzz.1;uc003zzx.3	64425;64425;64425;64425;9925	0;0;0;0;0	37749.9	superEnhancer	24670
chr17	27037483	27056067	18585	*	4	7997	37586.3	4_GES1-WT_peak_16969_lociStitched	Promoter (<=1kb)	17	27043011	27044908	1898	2	100861437	uc031qzq.1	0	NA	NA	NA	uc031qzq.1;uc002hco.3;uc010waw.2;uc031qzo.1;uc002hcb.3;uc010crv.2;uc002hca.1;uc002hcn.1;uc002hcl.2;uc002hcj.1;uc002hcm.1;uc002hcp.3;uc002hci.3;uc021ttu.1;uc002hce.2;uc002hcg.2;uc002hch.2;uc010was.1;uc010wat.1;uc010wau.1;uc010wav.1;uc031qzp.1	100861437;116238;116238;147011;147011;147011;147011;26772;26773;26808;26809;284086;6147;6147;83871;83871;83871;83871;83871;83871;83871;83871	0;0;0;-3016;0;0;0;0;0;0;0;0;0;0;0;0;0;0;0;0;0;0	37586.3	superEnhancer	24669
chr7	31973569	31997674	24106	*	7	5624	37578.8	7_GES1-WT_peak_37327_lociStitched	Intron (uc003tcm.2/5137, intron 2 of 17)	7	31792632	32110466	317835	2	5137	uc003tcm.2	112792	ENSG00000154678	PDE1C	phosphodiesterase 1C	uc003tcm.2;uc003tcn.1;uc003tco.2;uc003tcr.3;uc003tcs.3	5137;5137;5137;5137;5137	0;0;0;0;0	37578.8	superEnhancer	24668
chr17	80162678	80199866	37189	*	7	7515	37549.7	7_GES1-WT_peak_18300_lociStitched	Promoter (<=1kb)	17	80059346	80170689	111344	2	284001	uc002kdx.1	0	ENSG00000176155	CCDC57	coiled-coil domain containing 57	uc010dil.3;uc002keh.3;uc002kei.3;uc002kej.3;uc010wvj.2;uc002kdx.1;uc002kdz.1;uc002kea.3;uc021ufm.1;uc002keb.3;uc002kec.3;uc002ked.3;uc021ufn.1;uc021ufo.1	1453;1453;1453;1453;1453;284001;284001;9123;9123;9123;9123;9123;9123;9123	9537;12968;0;0;0;0;0;0;0;0;0;0;0;0	37549.7	superEnhancer	24667
chr11	126860633	126873317	12685	*	5	3908	37519.7	5_GES1-WT_peak_8749_lociStitched	Promoter (<=1kb)	11	126872805	126875953	3149	1	283165	uc001qef.1	0	ENSG00000218109	KIRREL3-AS3	KIRREL3 antisense RNA 3	uc021qrz.1;uc001qef.1;uc001qea.3;uc001qeb.3;uc001qec.1;uc001qed.4	100422918;283165;84623;84623;84623;84623	-2195;0;0;0;0;0	37519.7	superEnhancer	24666
chr7	136637668	136651811	14144	*	4	3858	37517	4_GES1-WT_peak_38839_lociStitched	Intron (uc003vtf.1/1129, intron 2 of 3)	7	136587914	136588041	128	1	574443	uc022amd.1	49754	ENSG00000207597	MIR490	microRNA 490	uc003vtf.1;uc003vtg.1;uc003vti.1;uc003vtj.1;uc003vtk.1;uc003vtl.1;uc003vtm.1;uc003vtn.1;uc003vto.1;uc003vtp.1	1129;1129;1129;1129;1129;1129;1129;1129;1129;349160	0;0;0;0;0;0;0;0;0;0	37517	superEnhancer	24665
chr2	55320806	55343298	22493	*	7	5712	37473.3	7_GES1-WT_peak_21749_lociStitched	Distal Intergenic	2	55199327	55277734	78408	2	57142	uc002ryg.3	-43072	ENSG00000115310	RTN4	reticulon 4	NA	NA	NA	37473.3	superEnhancer	24664
chr7	102145222	102162507	17286	*	4	4613	37439.7	4_GES1-WT_peak_38386_lociStitched	Promoter (<=1kb)	7	102123586	102152877	29292	2	100271927	uc022ajh.2	0	ENSG00000170667	RASA4B	RAS p21 protein activator 4B	uc022ajh.2;uc010lia.2;uc003uzt.2;uc003uzu.2;uc011kku.2;uc010lib.1	100271927;100271927;100271927;100271927;100271927;100271927	0;0;0;0;0;0	37439.7	superEnhancer	24663
chr14	69544176	69547529	3354	*	1	3355	37339.7	1_GES1-WT_peak_12911_lociStitched	Intron (uc001xkp.3/8816, intron 6 of 8)	14	69517637	69619914	102278	2	8816	uc001xkp.3	72385	ENSG00000139990	DCAF5	DDB1 and CUL4 associated factor 5	uc001xkp.3;uc001xkq.3	8816;8816	0;0	37339.7	superEnhancer	24662
chr6	85327465	85363598	36134	*	7	8411	37185.5	7_GES1-WT_peak_35634_lociStitched	Distal Intergenic	6	85397079	85473171	76093	2	9096	uc010kbq.2	109573	ENSG00000112837	TBX18	T-box transcription factor 18	NA	NA	NA	37185.5	superEnhancer	24661
chr10	17546209	17555733	9525	*	2	4405	37177	2_GES1-WT_peak_4807_lociStitched	Distal Intergenic	10	17362676	17496254	133579	2	338596	uc010qce.2	-49955	ENSG00000148488	ST8SIA6	ST8 alpha-N-acetyl-neuraminide alpha-2,8-sialyltransferase 6	NA	NA	NA	37177	superEnhancer	24660
chr7	73894320	73898863	4544	*	4	3120	37142.2	4_GES1-WT_peak_37924_lociStitched	Intron (uc003uap.3/9569, intron 1 of 26)	7	73920322	74016918	96597	1	9569	uc003uar.1	-21459	ENSG00000006704	GTF2IRD1	GTF2I repeat domain containing 1	uc003uap.3;uc003uaq.3;uc010lbq.3	9569;9569;9569	0;0;0	37142.2	superEnhancer	24659
chr2	221089299	221094460	5162	*	4	3754	37005.9	4_GES1-WT_peak_23913_lociStitched	Distal Intergenic	2	220771223	220771286	64	2	100422959	uc021vxd.1	-318013	ENSG00000266518	MIR4268	microRNA 4268	NA	NA	NA	37005.9	superEnhancer	24658
chr15	99432007	99450079	18073	*	6	6364	36865.3	6_GES1-WT_peak_14894_lociStitched	Exon (uc010urq.2/3480, exon 3 of 11)	15	99454544	99460184	5641	1	3480	uc010urr.1	-4465	ENSG00000140443	IGF1R	insulin like growth factor 1 receptor	uc010urq.2;uc002bul.3;uc010bon.3;uc010urr.1	3480;3480;3480;3480	0;0;0;-4465	36865.3	superEnhancer	24657
chrX	153596709	153640364	43656	*	10	9944	36850	10_GES1-WT_peak_44284_lociStitched	Promoter (<=1kb)	23	153629579	153637551	7973	2	1774	uc004fks.1	0	ENSG00000013563	DNASE1L1	deoxyribonuclease 1 like 1	uc004fks.1;uc004fkt.1;uc004fku.1;uc004fkv.1;uc004fkw.1;uc004fkl.3;uc004fkk.2;uc010nuu.1;uc010nux.1;uc004fkm.2;uc004fko.2;uc031tku.1;uc004fkn.1;uc004fkq.1;uc004fkr.1;uc004fkx.3;uc004fky.3;uc004fkz.3;uc004fla.3;uc004flb.3;uc004flc.4;uc010nuy.3	1774;1774;1774;1774;1774;2010;2316;2316;26778;6134;6134;6134;6134;6134;6134;6901;6901;6901;6901;6901;6901;6901	0;0;0;0;0;0;0;0;0;0;0;0;0;0;0;0;0;0;0;0;0;0	36850	superEnhancer	24656
chr6	74275062	74308443	33382	*	4	6400	36773.6	4_GES1-WT_peak_35525_lociStitched	3' UTR	6	74303102	74345223	42122	2	26503	uc010kax.3	36780	ENSG00000119899	SLC17A5	solute carrier family 17 member 5	uc010kax.3;uc003phn.4;uc010kay.3;uc011dyo.1	26503;26503;26503;26503	0;0;0;0	36773.6	superEnhancer	24655
chr10	17242417	17271938	29522	*	5	7269	36769.7	5_GES1-WT_peak_4798_lociStitched	Promoter (<=1kb)	10	17184982	17244070	59089	2	1787	uc001iop.3	0	ENSG00000107614	TRDMT1	tRNA aspartic acid methyltransferase 1	uc001iop.3;uc001ios.3;uc009xjt.3;uc010qcd.2;uc001iou.2	1787;1787;1787;1787;7431	0;0;0;0;0	36769.7	superEnhancer	24654
chr1	20929766	20941461	11696	*	2	4152	36728.9	2_GES1-WT_peak_628_lociStitched	Exon (uc001bdk.3/978, exon 2 of 4)	1	20915444	20945400	29957	1	978	uc009vpv.3	14322	ENSG00000158825	CDA	cytidine deaminase	uc001bdk.3;uc001bdl.3;uc009vpv.3	978;978;978	0;0;0	36728.9	superEnhancer	24653
chr13	113831768	113843445	11678	*	3	4732	36601.2	3_GES1-WT_peak_12036_lociStitched	Promoter (<=1kb)	13	113831853	113840346	8494	2	55795	uc001vtb.3	0	ENSG00000126226	PCID2	PCI domain containing 2	uc001vtb.3;uc001vtg.3;uc021rmq.2;uc021rmr.2;uc021rms.2;uc021rmt.2;uc031qnm.1	55795;55795;55795;55795;55795;55795;55795	0;0;0;0;0;0;0	36601.2	superEnhancer	24652
chr13	33788134	33826529	38396	*	8	8469	36560.7	8_GES1-WT_peak_11253_lociStitched	Intron (uc001uuw.3/90627, intron 1 of 13)	13	33691685	33780187	88503	2	90627	uc021ria.1	-7947	ENSG00000133121	STARD13	StAR related lipid transfer domain containing 13	uc001uuw.3;uc001uux.3;uc010abh.1	90627;90627;90627	0;0;0	36560.7	superEnhancer	24651
chr1	169075212	169099467	24256	*	5	6062	36505.3	5_GES1-WT_peak_3118_lociStitched	Promoter (<=1kb)	1	169075947	169101960	26014	1	481	uc001gfr.1	0	ENSG00000143153	ATP1B1	ATPase Na+/K+ transporting subunit beta 1	uc001gft.3;uc001gfu.3;uc010plq.2;uc001gfr.1	29922;29922;29922;481	0;0;0;0	36505.3	superEnhancer	24650
chr9	117860556	117890307	29752	*	5	8475	36499.8	5_GES1-WT_peak_42360_lociStitched	Promoter (<=1kb)	9	117781854	117875036	93183	2	3371	uc010mvf.3	0	ENSG00000041982	TNC	tenascin C	uc010mvf.3;uc004bjj.4	3371;3371	0;0	36499.8	superEnhancer	24649
chr11	12188205	12205224	17020	*	4	6112	36443.2	4_GES1-WT_peak_6971_lociStitched	Intron (uc010rch.1/9645, intron 3 of 22)	11	12183626	12285331	101706	1	9645	uc001mkc.3	4579	ENSG00000133816	MICAL2	microtubule associated monooxygenase, calponin and LIM domain containing 2	uc010rch.1;uc001mjy.3;uc001mjz.3;uc001mka.3;uc010rci.2;uc001mkb.3;uc001mkc.3	9645;9645;9645;9645;9645;9645;9645	0;0;0;0;0;0;0	36443.2	superEnhancer	24648
chr10	114710654	114724333	13680	*	6	4059	36399.7	6_GES1-WT_peak_6387_lociStitched	Promoter (<=1kb)	10	114710882	114927436	216555	1	6934	uc010qrr.2	0	ENSG00000148737	TCF7L2	transcription factor 7 like 2	uc001lac.4;uc001lad.4;uc001lae.4;uc001laf.4;uc001lag.4;uc001lah.3;uc010qrk.2;uc010qrl.2;uc010qrm.2;uc010qrn.2;uc010qro.2;uc010qrp.2;uc010qrq.2;uc021pyg.1;uc021pyh.1;uc021pyi.1;uc021pyj.1;uc021pyk.1;uc021pyl.1;uc021pym.1;uc021pyn.1;uc021pyo.1;uc021pyp.1;uc010qrr.2;uc010qrs.2;uc010qrt.2	6934;6934;6934;6934;6934;6934;6934;6934;6934;6934;6934;6934;6934;6934;6934;6934;6934;6934;6934;6934;6934;6934;6934;6934;6934;6934	0;0;0;0;0;0;0;0;0;0;0;0;0;0;0;0;0;0;0;0;0;0;0;0;0;0	36399.7	superEnhancer	24647
chr1	98780629	98791587	10959	*	3	5243	36313.7	3_GES1-WT_peak_2145_lociStitched	Distal Intergenic	1	98676267	98738214	61948	1	729987	uc031pnf.1	104362	ENSG00000226053	LINC01776	long intergenic non-protein coding RNA 1776	NA	NA	NA	36313.7	superEnhancer	24646
chr21	36552836	36605749	52914	*	10	8820	36309.6	10_GES1-WT_peak_25860_lociStitched	Intron (uc002yut.1/861, intron 7 of 10)	21	36160098	36421641	261544	2	861	uc002yuk.4	-131195	ENSG00000159216	RUNX1	RUNX family transcription factor 1	uc002yut.1	861	0	36309.6	superEnhancer	24645
chr5	42984979	43020256	35278	*	6	8468	36294	6_GES1-WT_peak_32094_lociStitched	Promoter (<=1kb)	5	43014831	43018913	4083	2	648987	uc003jnc.3	0	ENSG00000177738	LOC648987	uncharacterized LOC648987	uc003jnc.3;uc003jnd.3;uc021xye.1	648987;648987;648987	0;0;0	36294	superEnhancer	24644
chr10	33403324	33432577	29254	*	7	6830	36280.8	7_GES1-WT_peak_5111_lociStitched	Distal Intergenic	10	33189246	33247293	58048	2	3688	uc001iwt.4	-156031	ENSG00000150093	ITGB1	integrin subunit beta 1	NA	NA	NA	36280.8	superEnhancer	24643
chr1	240192867	240208467	15601	*	3	3719	36248.9	3_GES1-WT_peak_4333_lociStitched	Distal Intergenic	1	240170824	240176560	5737	1	645884	uc021pld.1	22043	NA	RPS7P5	ribosomal protein S7 pseudogene 5	NA	NA	NA	36248.9	superEnhancer	24642
chr14	73074388	73082814	8427	*	3	3741	36224.3	3_GES1-WT_peak_12950_lociStitched	Exon (uc010arh.1/uc010arh.1, exon 1 of 1)	14	73128568	73190813	62246	2	8110	uc001xnd.1	107999	ENSG00000205683	DPF3	double PHD fingers 3	uc001xnc.2	8110	0	36224.3	superEnhancer	24641
chr9	26291842	26303454	11613	*	5	3444	36223.3	5_GES1-WT_peak_41200_lociStitched	Distal Intergenic	9	26066673	26118406	51734	1	100506422	uc022beu.1	225169	ENSG00000276759	LOC100506422	putative deoxyuridine 5'-triphosphate nucleotidohydrolase-like protein FLJ16323	NA	NA	NA	36223.3	superEnhancer	24640
chr9	111860247	111882849	22603	*	4	7029	36201	4_GES1-WT_peak_42174_lociStitched	Promoter (<=1kb)	9	111777415	111870850	93436	2	23731	uc004bds.4	0	ENSG00000106771	TMEM245	transmembrane protein 245	uc004bds.4;uc004bdt.4	23731;23731	0;0	36201	superEnhancer	24639
chr16	48983363	49006376	23014	*	4	4862	36143.5	4_GES1-WT_peak_15670_lociStitched	Distal Intergenic	16	49311829	49315742	3914	2	869	uc002efq.3	309366	ENSG00000102924	CBLN1	cerebellin 1 precursor	NA	NA	NA	36143.5	superEnhancer	24638
chr8	77585344	77595455	10112	*	3	4268	36130.2	3_GES1-WT_peak_40050_lociStitched	Promoter (<=1kb)	8	77593515	77620493	26979	1	79776	uc003yat.1	0	ENSG00000091656	ZFHX4	zinc finger homeobox 4	uc003yas.4;uc003yat.1;uc003yau.2	100192378;79776;79776	0;0;0	36130.2	superEnhancer	24637
chr15	90931475	90964199	32725	*	5	8231	36102.2	5_GES1-WT_peak_14769_lociStitched	Promoter (<=1kb)	15	90931473	91045475	114003	1	8826	uc002bpl.1	2	ENSG00000140575	IQGAP1	IQ motif containing GTPase activating protein 1	uc002bpl.1	8826	0	36102.2	superEnhancer	24636
chr5	30099194	30114409	15216	*	5	4772	36074.1	5_GES1-WT_peak_31822_lociStitched	Distal Intergenic	5	31193762	31251961	58200	1	1004	uc003jhc.2	-1079353	ENSG00000113361	CDH6	cadherin 6	NA	NA	NA	36074.1	superEnhancer	24635
chr17	38462823	38502152	39330	*	10	7071	36053.8	10_GES1-WT_peak_17216_lociStitched	Promoter (<=1kb)	17	38465423	38513895	48473	1	5914	uc002huk.2	0	ENSG00000131759	RARA	retinoic acid receptor alpha	uc002huk.2;uc002hul.4;uc010wfe.2;uc021txb.1;uc031rae.1;uc002hun.2;uc002huj.1	5914;5914;5914;5914;5914;5914;990	0;0;0;0;0;0;0	36053.8	superEnhancer	24634
chr18	8799253	8802250	2998	*	1	2999	36018.9	1_GES1-WT_peak_18487_lociStitched	Intron (uc002knq.2/23255, intron 8 of 14)	18	8789672	8832775	43104	1	23255	uc002kns.2	9581	ENSG00000168502	MTCL1	microtubule crosslinking factor 1	uc002knq.2;uc002knr.2;uc002kns.2	23255;23255;23255	0;0;0	36018.9	superEnhancer	24633
chr10	29429307	29450061	20755	*	3	5350	35980.9	3_GES1-WT_peak_5016_lociStitched	Distal Intergenic	10	29577990	29600158	22169	1	84569	uc001iul.3	-127929	ENSG00000120563	LYZL1	lysozyme like 1	NA	NA	NA	35980.9	superEnhancer	24632
chr7	1543629	1578527	34899	*	5	6455	35977.4	5_GES1-WT_peak_36784_lociStitched	Promoter (<=1kb)	7	1509913	1544018	34106	2	26173	uc003skn.2	0	ENSG00000164880	INTS1	integrator complex subunit 1	uc003skt.4;uc021zyr.1;uc003skv.4;uc003skn.2;uc003skq.2;uc003skr.3;uc003sks.1	202915;202915;202915;26173;26173;7975;7975	12091;0;0;0;0;0;0	35977.4	superEnhancer	24631
chr1	151509063	151521987	12925	*	5	4132	35976.7	5_GES1-WT_peak_2755_lociStitched	Promoter (<=1kb)	1	151518272	151518367	96	1	693139	uc021oyr.1	0	ENSG00000207606	MIR554	microRNA 554	uc009wmw.3;uc021oyr.1;uc001eyl.3;uc001eym.3;uc010pdf.2;uc010pdg.2	57530;693139;7286;7286;7286;7286	0;0;0;0;0;0	35976.7	superEnhancer	24630
chr2	151323341	151353846	30506	*	7	7162	35957.4	7_GES1-WT_peak_22917_lociStitched	Promoter (<=1kb)	2	151324707	151344209	19503	2	390	uc002txe.3	0	ENSG00000115963	RND3	Rho family GTPase 3	uc002txe.3;uc002txg.3;uc010zbv.2	390;390;390	0;0;0	35957.4	superEnhancer	24629
chr1	96827417	96840515	13099	*	6	3524	35950.2	6_GES1-WT_peak_2093_lociStitched	Distal Intergenic	1	97187175	97239518	52344	1	58155	uc001drm.2	-346660	ENSG00000117569	PTBP2	polypyrimidine tract binding protein 2	NA	NA	NA	35950.2	superEnhancer	24628
chr5	95354030	95368877	14848	*	4	4867	35938.1	4_GES1-WT_peak_32840_lociStitched	Distal Intergenic	5	95414842	95414916	75	1	693168	uc021ybp.1	-45965	ENSG00000207578	MIR583	microRNA 583	NA	NA	NA	35938.1	superEnhancer	24627
chr19	45905915	45928871	22957	*	4	6010	35916.2	4_GES1-WT_peak_20501_lociStitched	Promoter (<=1kb)	19	45882892	45908312	25421	2	10848	uc002pbn.3	0	ENSG00000104881	PPP1R13L	protein phosphatase 1 regulatory subunit 13 like	uc002pbn.3;uc002pbo.3;uc002pbp.2;uc002pbq.1;uc002pbr.1;uc002pbs.2;uc002pbt.2;uc002pbu.2;uc002pbv.3	10848;10848;10848;10849;10849;2067;2067;2067;2067	0;0;0;0;0;0;0;0;0	35916.2	superEnhancer	24626
chr3	100753723	100756205	2483	*	1	2484	35833.2	1_GES1-WT_peak_28135_lociStitched	Distal Intergenic	3	100581270	100712334	131065	2	25890	uc003dup.4	-41389	ENSG00000154175	ABI3BP	ABI family member 3 binding protein	NA	NA	NA	35833.2	superEnhancer	24625
chr3	120214395	120226680	12286	*	2	4338	35828.4	2_GES1-WT_peak_28422_lociStitched	Distal Intergenic	3	120128804	120169918	41115	2	11167	uc010hrb.2	-44477	ENSG00000163430	FSTL1	follistatin like 1	NA	NA	NA	35828.4	superEnhancer	24624
chr18	14826196	14852848	26653	*	6	5946	35736.3	6_GES1-WT_peak_18632_lociStitched	Promoter (<=1kb)	18	14830165	14830241	77	1	100422907	uc021uhz.1	0	ENSG00000265499	MIR3156-2	microRNA 3156-2	uc021uhz.1;uc010dlo.2;uc021uhy.1;uc010xal.1	100422907;374860;374860;374860	0;0;0;0	35736.3	superEnhancer	24623
chr12	46752767	46781214	28448	*	6	5848	35651	6_GES1-WT_peak_9452_lociStitched	Promoter (<=1kb)	12	46751971	46759090	7120	2	54407	uc010sli.2	0	ENSG00000134294	SLC38A2	solute carrier family 38 member 2	uc010sli.2;uc001rpg.3;uc001rph.3	54407;54407;54407	0;0;0	35651	superEnhancer	24622
chr17	39059010	39078785	19776	*	5	5325	35630.4	5_GES1-WT_peak_17239_lociStitched	Distal Intergenic	17	39081413	39093205	11793	2	25984	uc010cxg.3	14420	ENSG00000108244	KRT23	keratin 23	uc002hvm.1;uc010cxf.1;uc010wfl.1;uc010cxg.3	25984;25984;25984;25984	15051;15051;15051;14420	35630.4	superEnhancer	24621
chr1	246580014	246600157	20144	*	4	4279	35616.6	4_GES1-WT_peak_4452_lociStitched	Promoter (<=1kb)	1	245912642	246580714	668073	2	64754	uc001ibk.3	0	ENSG00000185420	SMYD3	SET and MYND domain containing 3	uc001ibk.3;uc001ibl.3	64754;64754	0;0	35616.6	superEnhancer	24620
chr11	14427612	14446224	18613	*	6	4785	35608.5	6_GES1-WT_peak_7023_lociStitched	Distal Intergenic	11	14299466	14386052	86587	2	22800	uc021qed.1	-41560	ENSG00000133818	RRAS2	RAS related 2	NA	NA	NA	35608.5	superEnhancer	24619
chr15	36005616	36031304	25689	*	3	6572	35538.2	3_GES1-WT_peak_13606_lociStitched	Intron (uc001zjc.3/100507466, intron 2 of 2)	15	35812474	35838404	25931	2	89978	uc001zjb.2	-167212	ENSG00000134146	DPH6	diphthamine biosynthesis 6	uc001zjc.3	100507466	0	35538.2	superEnhancer	24618
chr15	67090631	67108262	17632	*	4	3995	35523.2	4_GES1-WT_peak_14190_lociStitched	Distal Intergenic	15	67000930	67074337	73408	1	4091	uc002aqg.3	89701	ENSG00000137834	SMAD6	SMAD family member 6	NA	NA	NA	35523.2	superEnhancer	24617
chr6	155506930	155524264	17335	*	4	5811	35519.4	4_GES1-WT_peak_36546_lociStitched	Intron (uc003qqb.3/26230, intron 16 of 28)	6	155538097	155578857	40761	1	26230	uc003qqh.3	-13833	ENSG00000146426	TIAM2	TIAM Rac1 associated GEF 2	uc003qqb.3;uc003qqe.3;uc010kjj.3;uc003qqf.3;uc011efl.1;uc003qqg.3	26230;26230;26230;26230;26230;26230	0;0;0;0;0;0	35519.4	superEnhancer	24616
chr12	13246326	13254698	8373	*	4	3151	35501.5	4_GES1-WT_peak_9097_lociStitched	Promoter (<=1kb)	12	13236471	13248740	12270	2	83445	uc001rbj.3	0	ENSG00000111305	GSG1	germ cell associated 1	uc001rbj.3;uc001rbk.3;uc001rbl.3;uc001rbm.3;uc001rbn.3;uc001rbo.3;uc001rbp.3;uc001rbq.2	83445;83445;83445;83445;83445;83445;83445;83445	0;0;0;0;0;0;0;0	35501.5	superEnhancer	24615
chr9	130282018	130287424	5407	*	4	3155	35388.8	4_GES1-WT_peak_42623_lociStitched	Exon (uc004brh.3/64855, exon 4 of 14)	9	130257476	130265780	8305	1	90678	uc004brg.2	24542	ENSG00000148356	LRSAM1	leucine rich repeat and sterile alpha motif containing 1	uc004brh.3;uc004bri.3;uc004brj.4	64855;64855;64855	0;0;0	35388.8	superEnhancer	24614
chr9	99179948	99183906	3959	*	3	3008	35386.7	3_GES1-WT_peak_42002_lociStitched	Promoter (<=1kb)	9	99148225	99180669	32445	2	195828	uc004awf.3	0	ENSG00000165244	ZNF367	zinc finger protein 367	uc004awf.3;uc004awg.3	195828;195828	0;0	35386.7	superEnhancer	24613
chr12	106499539	106539780	40242	*	10	9180	35384.8	10_GES1-WT_peak_10555_lociStitched	Promoter (<=1kb)	12	106457125	106533811	76687	2	9891	uc001tlj.1	0	ENSG00000074590	NUAK1	NUAK family kinase 1	uc001tlj.1	9891	0	35384.8	superEnhancer	24612
chr14	100040307	100054087	13781	*	5	4723	35373.1	5_GES1-WT_peak_13327_lociStitched	Exon (uc021sbo.1/uc021sbo.1, exon 1 of 1)	14	99977603	100070727	93125	2	317762	uc010avr.3	16640	ENSG00000205476	CCDC85C	coiled-coil domain containing 85C	uc010avr.3	317762	0	35373.1	superEnhancer	24611
chr2	66660998	66673633	12636	*	5	4693	35350.5	5_GES1-WT_peak_21913_lociStitched	Promoter (<=1kb)	2	66662532	66799583	137052	1	4211	uc002sdt.3	0	ENSG00000143995	MEIS1	Meis homeobox 1	uc002sdt.3;uc002sdu.3;uc010yqh.2;uc010yqi.2;uc002sdw.1;uc031rof.1	4211;4211;4211;4211;4211;730198	0;0;0;0;0;-396	35350.5	superEnhancer	24610
chr5	172193275	172243922	50648	*	8	7315	35316.9	8_GES1-WT_peak_34008_lociStitched	Promoter (<=1kb)	5	172195093	172197634	2542	2	1843	uc003mbu.2	0	ENSG00000120129	DUSP1	dual specificity phosphatase 1	uc003mbu.2;uc003mbv.2	1843;1843	0;0	35316.9	superEnhancer	24609
chr13	109798754	109809961	11208	*	2	4936	35246.9	2_GES1-WT_peak_11959_lociStitched	Intron (uc001vqt.1/23026, intron 32 of 34)	13	109816253	109819651	3399	2	100885782	uc031qng.1	9690	ENSG00000236242	MYO16-AS1	MYO16 antisense RNA 1	uc001vqt.1;uc010agk.2	23026;23026	0;0	35246.9	superEnhancer	24608
chr22	50683104	50745993	62890	*	8	10299	35243.6	8_GES1-WT_peak_26960_lociStitched	Promoter (<=1kb)	22	50713408	50720510	7103	2	23654	uc003bkt.1	0	ENSG00000196576	PLXNB2	plexin B2	uc003bkt.1;uc003bku.1;uc003bkv.4;uc011arv.1;uc003bkr.3;uc010hay.1;uc011art.1;uc010haz.2;uc003bko.2;uc003bkl.1;uc003bkm.1;uc003bkq.2;uc010haw.3;uc003bkg.3;uc003bkh.3;uc003bkj.3;uc010hav.3;uc003bkk.1;uc003bkb.1;uc010har.1;uc010has.1;uc010hau.1	23654;23654;23654;414918;5600;5600;5600;5600;6300;6300;6300;6300;6300;83933;83933;83933;83933;83933;85378;85378;85378;85378	0;0;0;0;0;0;0;0;0;0;0;0;0;0;0;0;0;0;0;0;0;0	35243.6	superEnhancer	24607
chr10	3796885	3828323	31439	*	7	6008	35221.1	7_GES1-WT_peak_4546_lociStitched	Promoter (<=1kb)	10	3818188	3827473	9286	2	1316	uc001iha.3	0	ENSG00000067082	KLF6	Kruppel like factor 6	uc001iha.3;uc010qaj.2;uc010qak.2;uc010qal.2;uc001ihb.2	1316;1316;1316;1316;1316	0;0;0;0;0	35221.1	superEnhancer	24606
chr16	61824735	61833319	8585	*	3	3792	35214	3_GES1-WT_peak_15837_lociStitched	Intron (uc002eog.2/1006, intron 7 of 11)	16	61760082	61891142	131061	2	1006	uc002eoh.3	57823	ENSG00000150394	CDH8	cadherin 8	uc002eog.2;uc002eoh.3	1006;1006	0;0	35214	superEnhancer	24605
chr6	10720483	10761082	40600	*	5	7276	35208.3	5_GES1-WT_peak_34397_lociStitched	Promoter (<=1kb)	6	10747995	10894437	146443	1	221711	uc011dim.1	0	ENSG00000153157	SYCP2L	synaptonemal complex protein 2 like	uc011dim.1;uc010jot.3;uc010jou.3;uc003mzm.3;uc021ylk.1;uc021yll.1;uc010joq.2;uc003mzh.3;uc021ylj.1;uc003mzk.4;uc010jor.3;uc010jos.1	221711;4117;4117;4117;4117;4117;51522;51522;51522;81853;81853;81853	0;70028;77631;77706;77706;77706;0;0;0;0;0;0	35208.3	superEnhancer	24604
chr20	43348615	43360059	11445	*	3	4628	35173.9	3_GES1-WT_peak_25059_lociStitched	3' UTR	20	43343885	43356452	12568	1	8839	uc002xmq.3	4730	ENSG00000064205	CCN5	cellular communication network factor 5	uc002xml.1;uc002xmp.3;uc002xmq.3	79015;8839;8839	0;0;0	35173.9	superEnhancer	24603
chr22	39673705	39722066	48362	*	7	9740	35154.3	7_GES1-WT_peak_26704_lociStitched	Promoter (<=1kb)	22	39715057	39715118	62	2	26807	uc003axn.1	0	ENSG00000263764	SNORD43	small nucleolar RNA, C/D box 43	uc003axn.1;uc003axh.3;uc003axi.3;uc003axj.3;uc011aoj.1	26807;6122;6122;6122;6122	0;0;0;0;0	35154.3	superEnhancer	24602
chr5	83667486	83689815	22330	*	4	6627	35127.3	4_GES1-WT_peak_32735_lociStitched	Promoter (<=1kb)	5	83238126	83680611	442486	2	10085	uc003kio.1	0	ENSG00000164176	EDIL3	EGF like repeats and discoidin domains 3	uc003kio.1;uc003kip.1	10085;10085	0;0	35127.3	superEnhancer	24601
chr15	37387474	37394988	7515	*	6	4226	34948.5	6_GES1-WT_peak_13634_lociStitched	Promoter (<=1kb)	15	37183222	37390562	207341	2	4212	uc001zjl.3	0	ENSG00000134138	MEIS2	Meis homeobox 2	uc001zjl.3;uc010ucj.2;uc001zjm.3;uc001zjn.3;uc001zjo.4;uc001zjp.4;uc001zjr.4;uc001zjs.4;uc001zjt.3;uc001zju.3	4212;4212;4212;4212;4212;4212;4212;4212;4212;4212	0;0;0;0;0;0;0;0;0;0	34948.5	superEnhancer	24600
chr10	18969953	18973245	3293	*	2	2972	34942.4	2_GES1-WT_peak_4847_lociStitched	Exon (uc001iqe.3/uc001iqe.3, exon 1 of 1)	10	18948313	18966940	18628	1	221079	uc001iqd.1	21640	ENSG00000165997	ARL5B	ADP ribosylation factor like GTPase 5B	uc001iqd.1	221079	0	34942.4	superEnhancer	24599
chr7	106409892	106416913	7022	*	4	3470	34930.2	4_GES1-WT_peak_38485_lociStitched	Exon (uc003vds.3/uc003vds.3, exon 1 of 5)	7	106505723	106547592	41870	1	5294	uc003vdv.4	-88810	ENSG00000105851	PIK3CG	phosphatidylinositol-4,5-bisphosphate 3-kinase catalytic subunit gamma	NA	NA	NA	34930.2	superEnhancer	24598
chr6	31762494	31804137	41644	*	7	8754	34910.2	7_GES1-WT_peak_34890_lociStitched	Promoter (<=1kb)	6	31803040	31803103	64	1	26801	uc003nxo.1	0	ENSG00000201823	SNORD48	small nucleolar RNA, C/D box 48	uc003nxp.3;uc003nxo.1;uc003nxj.3;uc003nxk.2;uc003nxh.3;uc010jte.3;uc003rjx.2;uc003rjy.2;uc003rjz.2;uc003nxg.3;uc003nxe.3;uc011doi.1	26797;26801;3303;3304;3305;3305;50854;50854;50854;57819;7407;7407	-716;0;0;0;0;0;0;0;0;0;0;0	34910.2	superEnhancer	24597
chr3	170519477	170529794	10318	*	3	5437	34872.8	3_GES1-WT_peak_29176_lociStitched	Intron (uc011bpt.1/5010, intron 3 of 3)	3	170582665	170588045	5381	2	200916	uc003fhb.4	58251	ENSG00000163584	RPL22L1	ribosomal protein L22 like 1	uc011bpt.1	5010	0	34872.8	superEnhancer	24596
chr7	157092498	157104142	11645	*	3	4308	34812.7	3_GES1-WT_peak_39107_lociStitched	Distal Intergenic	7	157129710	157179018	49309	1	10049	uc003wnj.3	-25568	ENSG00000105993	DNAJB6	DnaJ heat shock protein family (Hsp40) member B6	NA	NA	NA	34812.7	superEnhancer	24595
chr6	27098813	27115444	16632	*	5	6009	34774.2	5_GES1-WT_peak_34740_lociStitched	Promoter (<=1kb)	6	27115405	27115467	63	1	100422934	uc021yoz.1	0	ENSG00000265565	MIR3143	microRNA 3143	uc021yoz.1;uc003niy.1;uc003niz.4;uc003nix.2;uc003niw.3;uc003niv.3	100422934;8294;85235;85236;8969;8970	0;0;0;0;0;0	34774.2	superEnhancer	24594
chr10	21805783	21824401	18619	*	3	5635	34759.8	3_GES1-WT_peak_4870_lociStitched	Promoter (<=1kb)	10	21802409	21814611	12203	2	387640	uc009xkd.3	0	ENSG00000180592	SKIDA1	SKI/DACH domain containing 1	uc009xkd.3;uc001iqq.2;uc001iqr.2;uc001iqu.2;uc001iqs.3;uc001iqt.3;uc001iqv.3;uc001iqw.1;uc001iqx.1;uc009xke.1;uc009xkf.1;uc021pny.1	387640;8028;8028;8028;8028;8028;8028;8028;8028;8028;8028;8028	0;0;0;0;0;0;0;0;0;0;0;0	34759.8	superEnhancer	24593
chr14	23057705	23091770	34066	*	8	6066	34726.9	8_GES1-WT_peak_12132_lociStitched	Promoter (<=1kb)	14	23033807	23058143	24337	2	1603	uc001wgl.2	0	ENSG00000129562	DAD1	defender against cell death 1	uc001wgl.2;uc010tmz.1;uc010tna.1;uc001wgm.3;uc010tnb.2	1603;63874;63874;63874;63874	0;0;0;0;0	34726.9	superEnhancer	24592
chr22	40881876	40909442	27567	*	5	5864	34706.9	5_GES1-WT_peak_26730_lociStitched	Intron (uc003ayw.1/57591, intron 3 of 14)	22	40806292	40859438	53147	2	57591	uc003ayv.1	-22438	ENSG00000196588	MRTFA	myocardin related transcription factor A	uc003ayw.1;uc010gye.1;uc010gyf.1;uc003ayy.1	57591;57591;57591;57591	0;0;0;0	34706.9	superEnhancer	24591
chr1	67390107	67420527	30421	*	7	7461	34655.6	7_GES1-WT_peak_1642_lociStitched	Promoter (<=1kb)	1	67390578	67413923	23346	1	57708	uc001dda.5	0	ENSG00000198160	MIER1	MIER1 transcriptional regulator	uc001dda.5;uc001ddc.2;uc001dde.2;uc001ddf.2;uc001ddg.2;uc001ddh.2;uc009way.2;uc010opf.1;uc010opg.1;uc001ddi.2;uc001ddj.1;uc001dcx.3;uc001dcy.3	57708;57708;57708;57708;57708;57708;57708;57708;57708;57708;57708;79819;79819	0;0;0;0;0;0;0;0;0;0;0;0;0	34655.6	superEnhancer	24590
chr1	32154991	32180663	25673	*	4	6298	34571.3	4_GES1-WT_peak_976_lociStitched	Promoter (<=1kb)	1	32117848	32164207	46360	2	1307	uc001btj.1	0	ENSG00000084636	COL16A1	collagen type XVI alpha 1 chain	uc001btj.1;uc001btk.1;uc001btl.4	1307;1307;1307	0;0;0	34571.3	superEnhancer	24589
chr15	50454570	50459632	5063	*	3	3718	34567.1	3_GES1-WT_peak_13909_lociStitched	Distal Intergenic	15	50474393	50528589	54197	1	11001	uc001zxw.3	-14761	ENSG00000140284	SLC27A2	solute carrier family 27 member 2	NA	NA	NA	34567.1	superEnhancer	24588
chr16	59665686	59670560	4875	*	3	4012	34548.2	3_GES1-WT_peak_15821_lociStitched	Distal Intergenic	16	59788045	59789095	1051	2	644649	uc021tji.2	118535	NA	APOOP5	apolipoprotein O pseudogene 5	NA	NA	NA	34548.2	superEnhancer	24587
chr18	3649309	3675518	26210	*	4	5018	34500.2	4_GES1-WT_peak_18412_lociStitched	Exon (uc010dkn.3/9229, exon 5 of 11)	18	3594112	3597377	3266	1	649446	uc010wza.3	55197	NA	DLGAP1-AS1	DLGAP1 antisense RNA 1	uc002kme.2;uc010dkn.3;uc010wyw.2;uc010wyx.2;uc010wyy.2;uc002kmf.3;uc002kmg.3;uc010wyz.2	9229;9229;9229;9229;9229;9229;9229;9229	0;0;0;0;0;0;0;0	34500.2	superEnhancer	24586
chr1	209541853	209584186	42334	*	6	10042	34485.3	6_GES1-WT_peak_3782_lociStitched	Distal Intergenic	1	209602168	209605892	3725	1	642587	uc009xcn.3	-17982	ENSG00000230937	MIR205HG	MIR205 host gene	NA	NA	NA	34485.3	superEnhancer	24585
chr11	82568491	82571188	2698	*	2	2391	34471.5	2_GES1-WT_peak_8036_lociStitched	Exon (uc001ozr.3/5547, exon 3 of 10)	11	82535409	82611557	76149	2	5547	uc001ozr.3	40369	ENSG00000137509	PRCP	prolylcarboxypeptidase	uc001ozr.3;uc001ozs.3	5547;5547	0;0	34471.5	superEnhancer	24584
chr1	234735271	234768312	33042	*	6	6392	34469.4	6_GES1-WT_peak_4229_lociStitched	Promoter (<=1kb)	1	234765057	234770526	5470	1	100302691	uc021pkr.1	0	ENSG00000224939	LINC00184	long intergenic non-protein coding RNA 184	uc021pkr.1;uc009xfw.3;uc001hwf.3;uc001hwg.3	100302691;359948;359948;359948	0;0;0;0	34469.4	superEnhancer	24583
chr17	36606094	36622230	16137	*	4	5105	34463.8	4_GES1-WT_peak_17136_lociStitched	Promoter (<=1kb)	17	36614346	36655196	40851	1	57636	uc021twe.1	0	ENSG00000275832	ARHGAP23	Rho GTPase activating protein 23	uc021twd.1;uc021twe.1;uc002hqc.3	57636;57636;57636	0;0;-178	34463.8	superEnhancer	24582
chr3	133286983	133293505	6523	*	4	3710	34457.7	4_GES1-WT_peak_28671_lociStitched	Promoter (<=1kb)	3	133292434	133309118	16685	1	55573	uc003epp.4	0	ENSG00000091527	CDV3	CDV3 homolog	uc003epp.4;uc003epq.3;uc003epr.3	55573;55573;55573	0;0;0	34457.7	superEnhancer	24581
chr11	103396189	103416908	20720	*	5	3986	34422.1	5_GES1-WT_peak_8330_lociStitched	Distal Intergenic	11	103720634	103720708	75	1	100616457	uc021qpj.1	-303726	ENSG00000264200	MIR4693	microRNA 4693	NA	NA	NA	34422.1	superEnhancer	24580
chr1	164557970	164581864	23895	*	7	6811	34265.4	7_GES1-WT_peak_3053_lociStitched	Promoter (<=1kb)	1	164558766	164854300	295535	1	5087	uc010pkw.1	0	ENSG00000185630	PBX1	PBX homeobox 1	uc001gcs.3;uc001gct.3;uc010pku.2;uc010pkv.2;uc010pkw.1	5087;5087;5087;5087;5087	0;0;0;0;0	34265.4	superEnhancer	24579
chr6	52905911	52930854	24944	*	4	5759	34205.7	4_GES1-WT_peak_35335_lociStitched	Promoter (<=1kb)	6	52866098	52926600	60503	2	22858	uc003pbh.2	0	ENSG00000112144	CILK1	ciliogenesis associated kinase 1	uc003pbh.2;uc003pbi.2;uc003pbj.3;uc021zao.1;uc021zap.1;uc021zaq.1;uc021zar.1;uc021zas.1	22858;22858;22858;26268;26268;26268;26268;26268	0;0;0;0;0;0;-4917;-4917	34205.7	superEnhancer	24578
chr17	64939976	64961592	21617	*	3	4235	34191.6	3_GES1-WT_peak_17910_lociStitched	Promoter (<=1kb)	17	64960980	65029518	68539	1	27092	uc002jft.2	0	ENSG00000075461	CACNG4	calcium voltage-gated channel auxiliary subunit gamma 4	uc002jft.2	27092	0	34191.6	superEnhancer	24577
chr19	1168315	1215614	47300	*	8	7800	34188.4	8_GES1-WT_peak_19370_lociStitched	Promoter (<=1kb)	19	1107633	1174282	66650	2	22904	uc002lrk.4	0	ENSG00000064932	SBNO2	strawberry notch homolog 2	uc002lrk.4;uc010dse.3;uc002lrl.1	22904;22904;6794	0;0;0	34188.4	superEnhancer	24576
chr2	57406766	57410718	3953	*	1	3954	34182	1_GES1-WT_peak_21812_lociStitched	Distal Intergenic	2	58134786	58387055	252270	1	7444	uc002rzo.2	-724068	ENSG00000028116	VRK2	VRK serine/threonine kinase 2	NA	NA	NA	34182	superEnhancer	24575
chr3	189766360	189795733	29374	*	4	6374	34176.6	4_GES1-WT_peak_29479_lociStitched	Intron (uc011bsk.2/55214, intron 1 of 14)	3	189674517	189838908	164392	2	55214	uc011bsk.2	43175	ENSG00000090530	P3H2	prolyl 3-hydroxylase 2	uc011bsk.2;uc003fsg.3	55214;55214	0;0	34176.6	superEnhancer	24574
chr15	87898120	87913848	15729	*	4	3535	34158.7	4_GES1-WT_peak_14692_lociStitched	Distal Intergenic	15	88120160	88122917	2758	1	145978	uc002bmc.1	-206312	ENSG00000259527	LINC00052	long intergenic non-protein coding RNA 52	NA	NA	NA	34158.7	superEnhancer	24573
chr7	147102680	147111114	8435	*	2	4079	34108.6	2_GES1-WT_peak_38983_lociStitched	Intron (uc003weu.2/26047, intron 10 of 23)	7	147075109	147075213	105	2	100313895	uc022aop.1	-27467	ENSG00000221442	MIR548F4	microRNA 548f-4	uc022aoo.1;uc003weu.2	100302191;26047	0;0	34108.6	superEnhancer	24572
chr10	3132778	3150602	17825	*	4	4471	34019	4_GES1-WT_peak_4530_lociStitched	Promoter (<=1kb)	10	3146885	3172175	25291	1	5214	uc009xhs.1	0	ENSG00000067057	PFKP	phosphofructokinase, platelet	uc001igp.3;uc001igq.3;uc009xhr.3;uc009xhs.1;uc009xht.3;uc009xhu.3	5214;5214;5214;5214;5214;5214	0;0;0;0;0;-4962	34019	superEnhancer	24571
chr8	129077516	129090747	13232	*	2	2730	34014.2	2_GES1-WT_peak_40664_lociStitched	Exon (uc003ysl.3/5820, exon 5 of 8)	8	129061398	129061484	87	1	100302175	uc022bbj.1	16118	ENSG00000221176	MIR1207	microRNA 1207	uc003ysl.3	5820	0	34014.2	superEnhancer	24570
chr6	126261159	126278557	17399	*	4	3842	34004.6	4_GES1-WT_peak_36050_lociStitched	Promoter (<=1kb)	6	126277861	126301389	23529	1	135114	uc003qal.4	0	ENSG00000111911	HINT3	histidine triad nucleotide binding protein 3	uc003qal.4;uc010keu.3	135114;135114	0;0	34004.6	superEnhancer	24569
chr6	55761738	55764759	3022	*	1	3023	33990.5	1_GES1-WT_peak_35393_lociStitched	Distal Intergenic	6	55620238	55740375	120138	2	653	uc011dxf.2	-21363	ENSG00000112175	BMP5	bone morphogenetic protein 5	NA	NA	NA	33990.5	superEnhancer	24568
chr1	153918188	153974049	55862	*	8	7715	33969.7	8_GES1-WT_peak_2816_lociStitched	Promoter (<=1kb)	1	153946745	153950451	3707	2	10899	uc001fds.3	0	ENSG00000143543	JTB	jumping translocation breakpoint	uc001fds.3;uc031ppj.1;uc001fdm.2;uc001fdn.4;uc001fdo.4;uc010pef.2;uc010peg.2;uc001fdq.3;uc001fdr.3;uc001fde.4;uc001fdf.4;uc021pab.1;uc001fdi.4;uc001fdj.4;uc031pph.1;uc001fdk.4;uc010pee.3;uc001fdl.4;uc031ppi.1;uc031ppk.1;uc001fdt.2;uc031ppl.1;uc001fdu.2;uc001fdv.3;uc009woq.3;uc001fdw.3;uc010peh.2;uc001fdd.1	10899;148327;148327;148327;148327;148327;148327;148327;148327;200186;200186;200186;27173;27173;27173;27173;27173;27173;27173;5872;5872;5872;5872;6232;91181;91181;91181;9909	0;0;0;0;0;0;0;0;0;0;0;0;0;0;0;0;0;0;0;0;0;0;0;0;0;0;0;0	33969.7	superEnhancer	24567
chr6	44008823	44041603	32781	*	10	6779	33862.8	10_GES1-WT_peak_35199_lociStitched	Intron (uc003owm.1/uc003owm.1, intron 1 of 4)	6	43968337	43973694	5358	1	221416	uc003owo.3	40486	ENSG00000181577	C6orf223	chromosome 6 open reading frame 223	NA	NA	NA	33862.8	superEnhancer	24566
chr17	54219206	54264826	45621	*	9	8157	33809.7	9_GES1-WT_peak_17642_lociStitched	Promoter (<=1kb)	17	54230836	54560007	329172	1	162282	uc002iun.1	0	ENSG00000153930	ANKFN1	ankyrin repeat and fibronectin type III domain containing 1	uc002iun.1	162282	0	33809.7	superEnhancer	24565
chr15	71974369	71985106	10738	*	3	4517	33728.1	3_GES1-WT_peak_14357_lociStitched	Intron (uc002atb.1/79875, intron 7 of 16)	15	72050172	72063547	13376	1	79875	uc002atg.1	-65066	ENSG00000187720	THSD4	thrombospondin type 1 domain containing 4	uc002atb.1;uc002atd.1;uc010ukg.1;uc002ate.2	79875;79875;79875;79875	0;0;0;0	33728.1	superEnhancer	24564
chr5	148291779	148294808	3030	*	2	2588	33721.2	2_GES1-WT_peak_33585_lociStitched	Intron (uc003lpp.1/79628, intron 20 of 26)	5	148206156	148208197	2042	1	154	uc003lpr.2	85623	ENSG00000169252	ADRB2	adrenoceptor beta 2	uc003lpp.1	79628	0	33721.2	superEnhancer	24563
chr15	30213641	30239192	25552	*	6	5480	33713.3	6_GES1-WT_peak_13525_lociStitched	Distal Intergenic	15	29992357	30114706	122350	2	7082	uc001zcs.3	-98935	ENSG00000104067	TJP1	tight junction protein 1	NA	NA	NA	33713.3	superEnhancer	24562
chr5	34587549	34610988	23440	*	3	5393	33699.7	3_GES1-WT_peak_31927_lociStitched	Distal Intergenic	5	34656433	34832717	176285	1	26064	uc003jir.3	-45445	ENSG00000039560	RAI14	retinoic acid induced 14	NA	NA	NA	33699.7	superEnhancer	24561
chr7	32098789	32117183	18395	*	3	5818	33631.6	3_GES1-WT_peak_37335_lociStitched	Promoter (<=1kb)	7	31792632	32110466	317835	2	5137	uc003tcm.2	0	ENSG00000154678	PDE1C	phosphodiesterase 1C	uc003tcm.2;uc003tcn.1;uc003tco.2;uc003tcr.3;uc003tcs.3	5137;5137;5137;5137;5137	0;0;0;0;0	33631.6	superEnhancer	24560
chr1	144907334	144914983	7650	*	2	3243	33607.2	2_GES1-WT_peak_2560_lociStitched	Exon (uc001elw.4/9659, exon 15 of 44)	1	144895122	144922047	26926	2	9659	uc001eme.1	7064	ENSG00000178104	PDE4DIP	phosphodiesterase 4D interacting protein	uc021ott.2;uc021ots.1;uc010oye.3;uc031pnx.1;uc001elk.2;uc001ell.2;uc001elm.4;uc001eln.4;uc001elo.3;uc001elw.4;uc021ouh.1;uc001elx.4;uc001emb.1;uc001emc.2;uc001emd.2;uc001eme.1	100288142;100288142;400818;400818;653513;653513;653513;653513;9659;9659;9659;9659;9659;9659;9659;9659	0;0;0;0;0;0;0;0;0;0;0;0;0;0;0;0	33607.2	superEnhancer	24559
chr15	67174267	67194192	19926	*	5	4382	33573.3	5_GES1-WT_peak_14199_lociStitched	Distal Intergenic	15	67358195	67487533	129339	1	4088	uc002aqj.3	-164003	ENSG00000166949	SMAD3	SMAD family member 3	NA	NA	NA	33573.3	superEnhancer	24558
chr1	16245344	16280139	34796	*	8	5926	33393.7	8_GES1-WT_peak_509_lociStitched	5' UTR	1	16268364	16302627	34264	2	7709	uc001axl.4	22488	ENSG00000116809	ZBTB17	zinc finger and BTB domain containing 17	uc001axk.1;uc010obp.1;uc001axl.4;uc010obq.2;uc010obr.2;uc010obs.2;uc010obt.1;uc010obu.2;uc009vom.1;uc010obv.1;uc009von.1	23013;23013;7709;7709;7709;7709;7709;7709;7709;7709;7709	0;0;0;0;0;0;0;0;0;0;0	33393.7	superEnhancer	24557
chr10	26774112	26777863	3752	*	2	3423	33386.8	2_GES1-WT_peak_4943_lociStitched	Intron (uc001isr.3/54518, intron 2 of 4)	10	26727266	26856732	129467	1	54518	uc001iss.3	46846	ENSG00000077420	APBB1IP	amyloid beta precursor protein binding family B member 1 interacting protein	uc001isr.3;uc009xks.1;uc001iss.3	54518;54518;54518	0;0;0	33386.8	superEnhancer	24556
chr17	22244639	22261793	17155	*	7	3390	33255	7_GES1-WT_peak_16918_lociStitched	Distal Intergenic	17	22022437	22023991	1555	1	100462977	uc002gzb.2	222202	ENSG00000256618	MTRNR2L1	MT-RNR2 like 1	NA	NA	NA	33255	superEnhancer	24555
chr7	84764127	84767386	3260	*	1	3261	33205.1	1_GES1-WT_peak_38132_lociStitched	Intron (uc010led.3/223117, intron 1 of 17)	7	84624872	84751247	126376	2	223117	uc003uic.3	-12880	ENSG00000153993	SEMA3D	semaphorin 3D	uc010led.3;uc010lee.1	223117;223117	0;0	33205.1	superEnhancer	24554
chr10	99332347	99357686	25340	*	5	5294	33192.9	5_GES1-WT_peak_6157_lociStitched	Promoter (<=1kb)	10	99354975	99354995	21	1	100847017	uc031pwx.1	0	ENSG00000266668	MIR5692C2	microRNA 5692c-2	uc031pwx.1;uc001knx.2;uc001kny.3;uc001knz.3;uc001knw.3;uc009xvu.3;uc001koa.3;uc010qoy.1;uc001knv.1	100847017;112817;112817;112817;26287;26287;414157;55361;80019	0;0;0;0;0;0;0;0;0	33192.9	superEnhancer	24553
chr9	14312779	14323242	10464	*	4	4947	33171.9	4_GES1-WT_peak_41051_lociStitched	Promoter (<=1kb)	9	14081842	14314045	232204	2	4781	uc003zle.3	0	ENSG00000147862	NFIB	nuclear factor I B	uc003zle.3;uc003zlf.3;uc022bdo.1;uc022bdp.1;uc011lmo.2	4781;4781;4781;4781;4781	0;0;0;0;0	33171.9	superEnhancer	24552
chr2	237568844	237589391	20548	*	5	5146	33078.2	5_GES1-WT_peak_24247_lociStitched	Distal Intergenic	2	237478380	237490994	12615	1	57007	uc002vwd.3	90464	ENSG00000144476	ACKR3	atypical chemokine receptor 3	NA	NA	NA	33078.2	superEnhancer	24551
chr8	126524935	126544109	19175	*	6	4786	33057.7	6_GES1-WT_peak_40591_lociStitched	Distal Intergenic	8	126445943	126450644	4702	1	10221	uc010mdn.3	78992	ENSG00000173334	TRIB1	tribbles pseudokinase 1	NA	NA	NA	33057.7	superEnhancer	24550
chr3	191471299	191494990	23692	*	3	5756	33036.1	3_GES1-WT_peak_29511_lociStitched	Distal Intergenic	3	191178952	191179245	294	1	152138	uc011bso.2	292347	ENSG00000253548	PYDC2	pyrin domain containing 2	NA	NA	NA	33036.1	superEnhancer	24549
chr11	71850942	71875746	24805	*	6	4446	33010.5	6_GES1-WT_peak_7890_lociStitched	Downstream (<=300bp)	11	71846771	71850934	4164	1	2352	uc001ory.1	4171	ENSG00000110203	FOLR3	folate receptor gamma	uc001orx.1;uc001ory.1	2352;2352	4171;4171	33010.5	superEnhancer	24548
chr1	198081579	198096058	14480	*	5	2851	32918.8	5_GES1-WT_peak_3423_lociStitched	Distal Intergenic	1	198126108	198291548	165441	1	140609	uc001gun.4	-30050	ENSG00000151414	NEK7	NIMA related kinase 7	NA	NA	NA	32918.8	typicalEnhancer	24547
chr19	47332644	47406414	73771	*	12	10288	32916.6	12_GES1-WT_peak_20571_lociStitched	Promoter (<=1kb)	19	47333842	47333961	120	2	100170220	uc010xyi.1	0	NA	SNAR-E	small NF90 (ILF3) associated RNA E	uc010xyi.1;uc002pft.1;uc002pfu.1	100170220;1175;1175	0;0;0	32916.6	typicalEnhancer	24546
chr10	34976953	35022899	45947	*	8	9128	32879.7	8_GES1-WT_peak_5144_lociStitched	Exon (uc010qej.2/56288, exon 2 of 25)	10	34398488	35104253	705766	2	56288	uc010qej.2	81354	ENSG00000148498	PARD3	par-3 family cell polarity regulator	uc010qej.2;uc010qek.2;uc010qel.2;uc010qem.2;uc010qen.2;uc010qeo.2;uc010qep.2;uc010qeq.2;uc001ixp.2;uc001ixq.2;uc001ixr.2;uc001ixu.2	56288;56288;56288;56288;56288;56288;56288;56288;56288;56288;56288;56288	0;0;0;0;0;0;0;0;0;0;0;0	32879.7	typicalEnhancer	24545
chr20	62313051	62339831	26781	*	5	5494	32876.4	5_GES1-WT_peak_25480_lociStitched	Promoter (<=1kb)	20	62321103	62328544	7442	1	100533107	uc002yfx.1	0	ENSG00000026036	RTEL1-TNFRSF6B	RTEL1-TNFRSF6B readthrough (NMD candidate)	uc002yfu.2;uc002yfw.3;uc011abe.1;uc002yfx.1;uc002yfy.3;uc002yga.3;uc031rup.1;uc002ygc.4;uc002ygf.4;uc002ygh.5;uc011abf.3;uc011abg.3;uc011abh.3;uc031ruq.1;uc031rur.1;uc031rus.1;uc031rut.1;uc031ruu.1;uc031ruv.1;uc011abc.2;uc011abd.2;uc002ygi.2;uc002ygj.2;uc002ygk.3;uc002ygm.3;uc010gkk.2;uc010gkl.2;uc002ygn.4;uc002yfz.3	100533107;100533107;100533107;100533107;100533107;10139;10139;10139;10139;10139;10139;10139;10139;10139;10139;10139;10139;10139;10139;51750;51750;84619;84619;84619;84619;84619;84619;84619;8771	0;0;0;0;0;0;0;0;0;0;0;0;0;0;0;0;0;0;0;0;0;0;0;0;0;0;0;-74;0	32876.4	typicalEnhancer	24544
chr13	110651566	110670904	19339	*	5	4858	32841.5	5_GES1-WT_peak_11977_lociStitched	Distal Intergenic	13	110406184	110438914	32731	2	8660	uc001vqv.3	-212652	ENSG00000185950	IRS2	insulin receptor substrate 2	NA	NA	NA	32841.5	typicalEnhancer	24543
chr1	184020296	184027757	7462	*	2	3768	32718.6	2_GES1-WT_peak_3330_lociStitched	Promoter (<=1kb)	1	184020811	184043344	22534	1	116461	uc001gqt.4	0	ENSG00000198860	TSEN15	tRNA splicing endonuclease subunit 15	uc001gqt.4;uc001gqu.4;uc009wyg.3	116461;116461;116461	0;0;0	32718.6	typicalEnhancer	24542
chr3	145878468	145884974	6507	*	6	3849	32706.8	6_GES1-WT_peak_28844_lociStitched	Promoter (<=1kb)	3	145787228	145878779	91552	2	5352	uc011bnm.1	0	ENSG00000152952	PLOD2	procollagen-lysine,2-oxoglutarate 5-dioxygenase 2	uc011bnm.1;uc003evr.1;uc003evs.1	5352;5352;5352	0;0;0	32706.8	typicalEnhancer	24541
chr6	169470025	169474401	4377	*	3	3484	32658.5	3_GES1-WT_peak_36710_lociStitched	Distal Intergenic	6	169615875	169654137	38263	2	7058	uc003qwt.3	179736	ENSG00000186340	THBS2	thrombospondin 2	NA	NA	NA	32658.5	typicalEnhancer	24540
chr1	82146795	82173568	26774	*	5	6825	32656.2	5_GES1-WT_peak_1826_lociStitched	Promoter (<=1kb)	1	82165455	82458107	292653	1	23266	uc001dit.4	0	ENSG00000117114	ADGRL2	adhesion G protein-coupled receptor L2	uc001dis.3;uc001dit.4	23266;23266	0;0	32656.2	typicalEnhancer	24539
chr6	3797066	3809133	12068	*	3	4006	32625.8	3_GES1-WT_peak_34285_lociStitched	Distal Intergenic	6	3849632	3851551	1920	1	26240	uc003mvu.3	-40499	ENSG00000145945	FAM50B	family with sequence similarity 50 member B	NA	NA	NA	32625.8	typicalEnhancer	24538
chr18	57382767	57393310	10544	*	4	4245	32602	4_GES1-WT_peak_19140_lociStitched	Distal Intergenic	18	57098171	57364644	266474	2	147372	uc002lib.3	-18123	ENSG00000183287	CCBE1	collagen and calcium binding EGF domains 1	NA	NA	NA	32602	typicalEnhancer	24537
chr9	117439151	117464928	25778	*	4	5241	32601.4	4_GES1-WT_peak_42342_lociStitched	Promoter (<=1kb)	9	117428714	117444369	15656	2	100505478	uc022bmg.1	0	ENSG00000230601	TEX48	testis expressed 48	uc022bmg.1	100505478	0	32601.4	typicalEnhancer	24536
chr3	111569692	111593328	23637	*	5	4909	32571.8	5_GES1-WT_peak_28287_lociStitched	Promoter (<=1kb)	3	111578027	111695364	117338	1	90102	uc003dyd.3	0	ENSG00000144824	PHLDB2	pleckstrin homology like domain family B member 2	uc003dxz.3;uc003dya.3;uc003dyc.3;uc003dyd.3;uc010hqa.3;uc003dye.4;uc003dyf.4;uc003dyg.3	257068;257068;90102;90102;90102;90102;90102;90102	0;0;0;0;0;0;0;0	32571.8	typicalEnhancer	24535
chr10	127934704	127943156	8453	*	4	3885	32525.5	4_GES1-WT_peak_6653_lociStitched	Intron (uc001ljk.2/8038, intron 3 of 22)	10	127702902	128077127	374226	2	8038	uc001ljk.2	133971	ENSG00000148848	ADAM12	ADAM metallopeptidase domain 12	uc001ljk.2;uc010qul.1;uc001ljl.4;uc001ljm.3;uc001ljn.3	8038;8038;8038;8038;8038	0;0;0;0;0	32525.5	typicalEnhancer	24534
chr2	85172650	85199448	26799	*	4	6650	32496.5	4_GES1-WT_peak_22130_lociStitched	Promoter (<=1kb)	2	85198231	85286595	88365	1	56888	uc002sox.4	0	ENSG00000176407	KCMF1	potassium channel modulatory factor 1	uc002sox.4	56888	0	32496.5	typicalEnhancer	24533
chr17	55927051	55976796	49746	*	9	8948	32474.2	9_GES1-WT_peak_17689_lociStitched	Promoter (<=1kb)	17	55916287	55927433	11147	2	51649	uc002ivc.3	0	ENSG00000181610	MRPS23	mitochondrial ribosomal protein S23	uc002ivd.2;uc002ive.2;uc002ivc.3	404093;404093;51649	0;0;0	32474.2	typicalEnhancer	24532
chr11	62228639	62249119	20481	*	3	5673	32441.9	3_GES1-WT_peak_7543_lociStitched	Intron (uc001ntk.2/79026, intron 5 of 5)	11	62186507	62190678	4172	1	7356	uc001ntj.3	42132	ENSG00000149021	SCGB1A1	secretoglobin family 1A member 1	uc001ntk.2	79026	0	32441.9	typicalEnhancer	24531
chr21	25480173	25497325	17153	*	5	6577	32424.3	5_GES1-WT_peak_25635_lociStitched	Distal Intergenic	21	26212864	26430056	217193	1	339622	uc031rvb.1	-715539	ENSG00000226983	LINC01692	long intergenic non-protein coding RNA 1692	NA	NA	NA	32424.3	typicalEnhancer	24530
chr16	80207423	80210118	2696	*	1	2697	32307.5	1_GES1-WT_peak_16146_lociStitched	Distal Intergenic	16	80574854	80584541	9688	1	83657	uc002ffo.3	-364736	ENSG00000168589	DYNLRB2	dynein light chain roadblock-type 2	NA	NA	NA	32307.5	typicalEnhancer	24529
chr1	206530080	206578494	48415	*	10	8365	32297.6	10_GES1-WT_peak_3710_lociStitched	Promoter (<=1kb)	1	206557369	206628046	70678	1	23380	uc010prv.1	0	ENSG00000266028	SRGAP2	SLIT-ROBO Rho GTPase activating protein 2	uc010prt.1;uc001hdy.3;uc010pru.2;uc010prv.1;uc031pry.1;uc009xbt.4	23380;23380;23380;23380;23380;653464	0;0;0;0;0;0	32297.6	typicalEnhancer	24528
chr14	80854599	80858067	3469	*	3	2814	32252.3	3_GES1-WT_peak_13127_lociStitched	Intron (uc001xuw.1/100628307, intron 5 of 8)	14	80663868	80697397	33530	2	1734	uc010asy.3	-157202	ENSG00000211448	DIO2	iodothyronine deiodinase 2	uc001xuw.1	100628307	0	32252.3	typicalEnhancer	24527
chr1	69956672	69961053	4382	*	2	3966	32246.3	2_GES1-WT_peak_1699_lociStitched	Distal Intergenic	1	70032868	70340687	307820	1	57554	uc001deo.1	-71815	ENSG00000033122	LRRC7	leucine rich repeat containing 7	NA	NA	NA	32246.3	typicalEnhancer	24526
chr3	57936546	57970421	33876	*	6	8039	32243.2	6_GES1-WT_peak_27769_lociStitched	Distal Intergenic	3	57994127	58157982	163856	1	2317	uc003djj.2	-23706	ENSG00000136068	FLNB	filamin B	NA	NA	NA	32243.2	typicalEnhancer	24525
chr18	25691509	25708984	17476	*	5	4343	32238	5_GES1-WT_peak_18777_lociStitched	Intron (uc002kwg.2/1000, intron 2 of 15)	18	25530930	25757445	226516	2	1000	uc002kwg.2	48461	ENSG00000170558	CDH2	cadherin 2	uc002kwg.2	1000	0	32238	typicalEnhancer	24524
chr10	104989930	105015319	25390	*	3	5000	32235.1	3_GES1-WT_peak_6289_lociStitched	Promoter (<=1kb)	10	105005644	105007773	2130	1	729020	uc009xxi.2	0	ENSG00000235376	RPEL1	ribulose-5-phosphate-3-epimerase like 1	uc009xxi.2	729020	0	32235.1	typicalEnhancer	24523
chr11	11997766	12030747	32982	*	7	7843	32190.4	7_GES1-WT_peak_6957_lociStitched	Promoter (<=1kb)	11	11984543	12030155	45613	2	27122	uc010rcf.2	0	ENSG00000050165	DKK3	dickkopf WNT signaling pathway inhibitor 3	uc010rcf.2;uc001mju.3;uc001mjv.3;uc001mjw.3;uc010rcg.1	27122;27122;27122;27122;27122	0;0;0;0;0	32190.4	typicalEnhancer	24522
chr2	171231410	171251704	20295	*	4	5420	32179.8	4_GES1-WT_peak_23149_lociStitched	3' UTR	2	171225718	171511674	285957	1	140469	uc002ugb.3	5692	ENSG00000071909	MYO3B	myosin IIIB	uc002ufv.4;uc002ufw.3;uc002ufx.3;uc002ufy.3;uc002ufz.3;uc010fqb.2;uc002uga.3;uc002ugb.3	140469;140469;140469;140469;140469;140469;140469;140469	0;0;0;0;0;0;0;0	32179.8	typicalEnhancer	24521
chr3	15809524	15846258	36735	*	6	7986	32150.5	6_GES1-WT_peak_27175_lociStitched	Promoter (<=1kb)	3	15708744	15839691	130948	2	23243	uc011avz.1	0	ENSG00000206560	ANKRD28	ankyrin repeat domain 28	uc011avz.1;uc003caj.1;uc003cak.1;uc011awa.1;uc003cal.1;uc003cam.2	23243;23243;23243;23243;23243;23243	0;0;0;0;0;0	32150.5	typicalEnhancer	24520
chr6	37207420	37226461	19042	*	5	4522	32129.6	5_GES1-WT_peak_35044_lociStitched	Promoter (<=1kb)	6	37179954	37225413	45460	2	221468	uc003onl.3	0	ENSG00000172738	TMEM217	transmembrane protein 217	uc003onl.3;uc010jwr.3;uc010jws.3;uc003onm.4;uc003onn.3;uc010jwt.3	221468;221468;221468;221468;55633;55633	0;0;0;0;0;0	32129.6	typicalEnhancer	24519
chr10	17101712	17131086	29375	*	4	6664	32054	4_GES1-WT_peak_4795_lociStitched	Exon (uc001ioo.3/8029, exon 15 of 67)	10	16865965	17171816	305852	2	8029	uc001ioo.3	40730	ENSG00000107611	CUBN	cubilin	uc001ioo.3	8029	0	32054	typicalEnhancer	24518
chr8	8482714	8507030	24317	*	5	6350	32042.5	5_GES1-WT_peak_39186_lociStitched	Distal Intergenic	8	8559666	8561617	1952	1	137075	uc003wsi.3	-52636	ENSG00000253958	CLDN23	claudin 23	NA	NA	NA	32042.5	typicalEnhancer	24517
chr8	33070730	33076448	5719	*	5	3338	32021.8	5_GES1-WT_peak_39603_lociStitched	Distal Intergenic	8	33228344	33313413	85070	2	84750	uc003xjc.3	236965	ENSG00000172728	FUT10	fucosyltransferase 10	NA	NA	NA	32021.8	typicalEnhancer	24516
chr17	70382989	70419968	36980	*	8	8508	31943.3	8_GES1-WT_peak_17976_lociStitched	Exon (uc021uck.1/uc021uck.1, exon 1 of 1)	17	70399463	70588943	189481	2	100499467	uc002jiz.2	168975	ENSG00000227036	LINC00673	long intergenic non-protein coding RNA 673	uc002jiz.2	100499467	0	31943.3	typicalEnhancer	24515
chr4	166907788	166915778	7991	*	4	3451	31936	4_GES1-WT_peak_31278_lociStitched	5' UTR	4	166794410	167025609	231200	1	7092	uc011cjo.2	113378	ENSG00000038295	TLL1	tolloid like 1	uc021xud.1;uc003irh.2;uc011cjn.2;uc011cjo.2	7092;7092;7092;7092	0;0;0;0	31936	typicalEnhancer	24514
chr7	2548282	2570390	22109	*	5	5440	31921	5_GES1-WT_peak_36806_lociStitched	Promoter (<=1kb)	7	2566708	2566786	79	1	100616116	uc021zyy.1	0	ENSG00000264357	MIR4648	microRNA 4648	uc021zyy.1;uc021zyw.1;uc021zyx.1;uc003smf.3;uc003smg.3	100616116;3955;3955;3955;3955	0;0;0;0;0	31921	typicalEnhancer	24513
chr1	16114761	16126592	11832	*	5	3829	31886.1	5_GES1-WT_peak_496_lociStitched	Distal Intergenic	1	16133657	16134194	538	2	440567	uc009vol.1	7602	ENSG00000233954	UQCRHL	ubiquinol-cytochrome c reductase hinge protein like	uc001axd.1;uc001axe.1;uc001axh.1;uc001axi.1	54751;54751;54751;54751	0;0;23731;23302	31886.1	typicalEnhancer	24512
chr11	10269869	10286205	16337	*	5	4605	31862.1	5_GES1-WT_peak_6911_lociStitched	Intron (uc001mib.2/81846, intron 1 of 39)	11	9800214	10315754	515541	2	81846	uc001mib.2	29549	ENSG00000133812	SBF2	SET binding factor 2	uc001mib.2	81846	0	31862.1	typicalEnhancer	24511
chr12	104673385	104682383	8999	*	3	4650	31776.4	3_GES1-WT_peak_10493_lociStitched	Promoter (<=1kb)	12	104680460	104744085	63626	1	7296	uc010swp.3	0	ENSG00000198431	TXNRD1	thioredoxin reductase 1	uc021rcx.2;uc010swp.3;uc010swq.3;uc021rcy.2;uc021rcz.2;uc021rda.2;uc021rdb.2;uc001tku.4;uc001tkv.2	7296;7296;7296;7296;7296;7296;7296;7296;7296	0;0;0;0;0;0;0;0;-2399	31776.4	typicalEnhancer	24510
chr1	934963	960875	25913	*	4	6391	31759	4_GES1-WT_peak_169_lociStitched	Promoter (<=1kb)	1	955503	991499	35997	1	375790	uc001ack.2	0	ENSG00000188157	AGRN	agrin	uc001ack.2;uc001aci.2;uc010nyc.1;uc001acj.4	375790;57801;57801;9636	0;0;0;0	31759	typicalEnhancer	24509
chr5	33776596	33855669	79074	*	15	10781	31724.5	15_GES1-WT_peak_31902_lociStitched	Intron (uc003jia.1/81792, intron 2 of 23)	5	33527287	33892124	364838	2	81792	uc003jia.1	36455	ENSG00000151388	ADAMTS12	ADAM metallopeptidase with thrombospondin type 1 motif 12	uc003jia.1;uc010iuq.1;uc003jib.1	81792;81792;81792	0;0;0	31724.5	typicalEnhancer	24508
chr4	169436500	169480646	44147	*	5	8676	31710.8	5_GES1-WT_peak_31303_lociStitched	Intron (uc003iru.3/23022, intron 2 of 20)	4	169418217	169849608	431392	1	23022	uc011cjx.2	18283	ENSG00000129116	PALLD	palladin, cytoskeletal associated protein	uc003iru.3;uc011cjx.2	23022;23022	0;0	31710.8	typicalEnhancer	24507
chr12	79802037	79819171	17135	*	4	4783	31703.2	4_GES1-WT_peak_10154_lociStitched	Promoter (<=1kb)	12	79813037	79813101	65	1	100302136	uc021ray.1	0	ENSG00000221788	MIR1252	microRNA 1252	uc021ray.1;uc001sys.3;uc001syt.3;uc001syu.3;uc001syv.3	100302136;6857;6857;6857;6857	0;0;0;0;0	31703.2	typicalEnhancer	24506
chr7	6311376	6324458	13083	*	2	3350	31683.1	2_GES1-WT_peak_36889_lociStitched	Promoter (<=1kb)	7	6201412	6312242	110831	2	9265	uc003spt.3	0	ENSG00000008256	CYTH3	cytohesin 3	uc003spt.3	9265	0	31683.1	typicalEnhancer	24505
chr2	178029824	178041006	11183	*	6	4101	31654.6	6_GES1-WT_peak_23269_lociStitched	Distal Intergenic	2	178077422	178084054	6633	1	220988	uc002ulb.1	-36416	ENSG00000170144	HNRNPA3	heterogeneous nuclear ribonucleoprotein A3	NA	NA	NA	31654.6	typicalEnhancer	24504
chr1	7358495	7362065	3571	*	3	2874	31598	3_GES1-WT_peak_287_lociStitched	Intron (uc001aoi.3/23261, intron 5 of 22)	1	7732054	7805082	73029	1	23261	uc010nzv.1	-369989	ENSG00000171735	CAMTA1	calmodulin binding transcription activator 1	uc001aoi.3	23261	0	31598	typicalEnhancer	24503
chr8	38749090	38796686	47597	*	6	9411	31590.1	6_GES1-WT_peak_39690_lociStitched	Promoter (<=1kb)	8	38758753	38831430	72678	1	59339	uc003xmi.4	0	ENSG00000169499	PLEKHA2	pleckstrin homology domain containing A2	uc003xmi.4;uc011lce.2	59339;59339	0;0	31590.1	typicalEnhancer	24502
chr14	68697194	68723218	26025	*	4	4797	31521.5	4_GES1-WT_peak_12866_lociStitched	Exon (uc021rvd.1/uc021rvd.1, exon 1 of 1)	14	68286496	69196935	910440	1	5890	uc001xkg.2	410698	ENSG00000182185	RAD51B	RAD51 paralog B	uc001xkd.3;uc010aqr.3;uc001xke.3;uc001xkf.2;uc001xkg.2	5890;5890;5890;5890;5890	0;0;0;0;0	31521.5	typicalEnhancer	24501
chr8	36999737	37003596	3860	*	2	3537	31511.1	2_GES1-WT_peak_39640_lociStitched	Distal Intergenic	8	36641842	36793643	151802	1	157855	uc010lvw.3	357895	ENSG00000215262	KCNU1	potassium calcium-activated channel subfamily U member 1	NA	NA	NA	31511.1	typicalEnhancer	24500
chr19	41815634	41874482	58849	*	9	8400	31490.1	9_GES1-WT_peak_20312_lociStitched	Promoter (<=1kb)	19	41856816	41889987	33172	1	641649	uc002oqi.3	0	ENSG00000142046	TMEM91	transmembrane protein 91	uc002opz.4;uc002oqa.4;uc002oqb.4;uc010ehm.3;uc002oqc.4;uc002oqd.4;uc002oqe.4;uc010ehn.3;uc010xvy.2;uc010ehp.3;uc002oqf.4;uc002oqi.3;uc010ehq.3;uc002oqh.2;uc002oqj.2;uc002oqg.3	11100;11100;11100;11100;11100;11100;11100;11100;11100;11100;11100;641649;641649;7040;80776;90324	0;0;0;0;0;0;0;0;0;37647;7336;0;0;0;0;0	31490.1	typicalEnhancer	24499
chr2	28491832	28500302	8471	*	3	2917	31470.6	3_GES1-WT_peak_21271_lociStitched	Intron (uc002rlp.2/9577, intron 10 of 11)	2	28530558	28533326	2769	2	100505716	uc002rly.3	33024	ENSG00000223522	LOC100505716	uncharacterized LOC100505716	uc002rlp.2;uc002rlq.3;uc002rlr.3;uc002rls.3;uc002rlt.3;uc002rlu.3;uc002rlv.3	9577;9577;9577;9577;9577;9577;9577	0;0;0;0;0;0;0	31470.6	typicalEnhancer	24498
chr9	69137484	69152121	14638	*	5	3570	31369.2	5_GES1-WT_peak_41497_lociStitched	Promoter (<=1kb)	9	69080244	69147854	67611	2	595135	uc004aff.4	0	ENSG00000277778	PGM5P2	phosphoglucomutase 5 pseudogene 2	uc004aff.4	595135	0	31369.2	typicalEnhancer	24497
chr19	43323611	43338348	14738	*	2	4931	31366.9	2_GES1-WT_peak_20363_lociStitched	Promoter (<=1kb)	19	43326015	43331030	5016	1	100289650	uc002ouq.1	0	ENSG00000225877	PSG8-AS1	PSG8 antisense RNA 1	uc002ouq.1;uc002oug.1;uc002oun.3;uc002ouf.3;uc010eip.3	100289650;5669;5669;5671;653492	0;0;0;0;0	31366.9	typicalEnhancer	24496
chr9	13264372	13279685	15314	*	6	4735	31332.4	6_GES1-WT_peak_41032_lociStitched	Promoter (<=1kb)	9	13105703	13279563	173861	2	8777	uc003zlb.4	0	ENSG00000107186	MPDZ	multiple PDZ domain crumbs cell polarity complex component	uc003zlb.4;uc010mhz.4;uc011lmn.3	8777;8777;8777	0;0;0	31332.4	typicalEnhancer	24495
chr1	218547935	218564795	16861	*	5	3919	31327.7	5_GES1-WT_peak_3938_lociStitched	Intron (uc001hll.3/7042, intron 2 of 2)	1	218517538	218519020	1483	2	728463	uc031psd.1	-28915	ENSG00000232480	TGFB2-AS1	TGFB2 antisense RNA 1 (head to head)	uc001hll.3;uc001hlm.3;uc001hln.3;uc001hlo.3;uc010pue.2	7042;7042;7042;7042;7042	0;0;0;0;0	31327.7	typicalEnhancer	24494
chr18	8945231	8949621	4391	*	3	3647	31299.5	3_GES1-WT_peak_18493_lociStitched	Distal Intergenic	18	9102628	9134343	31716	1	4729	uc002knu.3	-153007	ENSG00000178127	NDUFV2	NADH:ubiquinone oxidoreductase core subunit V2	NA	NA	NA	31299.5	typicalEnhancer	24493
chr9	14205169	14222858	17690	*	3	4618	31242.3	3_GES1-WT_peak_41045_lociStitched	Intron (uc003zle.3/4781, intron 2 of 8)	9	14081842	14180797	98956	2	4781	uc003zld.3	-24372	ENSG00000147862	NFIB	nuclear factor I B	uc003zle.3;uc003zlf.3;uc022bdo.1;uc022bdp.1;uc011lmo.2	4781;4781;4781;4781;4781	0;0;0;0;0	31242.3	typicalEnhancer	24492
chr3	16100980	16143951	42972	*	11	6602	31227.8	11_GES1-WT_peak_27193_lociStitched	Intron (uc003caq.4/117248, intron 4 of 12)	3	16216184	16271253	55070	1	117248	uc003car.4	-72233	ENSG00000131386	GALNT15	polypeptide N-acetylgalactosaminyltransferase 15	uc003caq.4	117248	0	31227.8	typicalEnhancer	24491
chr1	145610380	145622382	12003	*	3	4425	31227	3_GES1-WT_peak_2599_lociStitched	Promoter (<=1kb)	1	145592605	145610627	18023	2	10623	uc001eog.3	0	ENSG00000186141	POLR3C	RNA polymerase III subunit C	uc031poc.1;uc021ott.2;uc001eog.3;uc001eoh.3;uc009wix.3;uc001eoj.3	100132406;100288142;10623;10623;10623;27246	0;0;0;0;0;0	31227	typicalEnhancer	24490
chr7	129589000	129610945	21946	*	4	5995	31224.8	4_GES1-WT_peak_38707_lociStitched	Promoter (<=1kb)	7	129470573	129592783	122211	2	7328	uc022aln.1	0	ENSG00000186591	UBE2H	ubiquitin conjugating enzyme E2 H	uc022aln.1;uc003vpf.2;uc003vpg.2	7328;7328;7328	0;0;0	31224.8	typicalEnhancer	24489
chr10	79264637	79292263	27627	*	5	6928	31177.1	5_GES1-WT_peak_5810_lociStitched	Intron (uc001jxj.2/3778, intron 1 of 28)	10	78629359	79397577	768219	2	3778	uc001jxj.2	105314	ENSG00000156113	KCNMA1	potassium calcium-activated channel subfamily M alpha 1	uc001jxj.2;uc021ptu.1;uc001jxm.3;uc001jxn.3;uc001jxo.3;uc001jxq.3	3778;3778;3778;3778;3778;3778	0;0;0;0;0;0	31177.1	typicalEnhancer	24488
chr9	4292417	4299869	7453	*	3	4337	31159.5	3_GES1-WT_peak_40968_lociStitched	Promoter (<=1kb)	9	4117768	4298496	180729	2	169792	uc003zid.1	0	ENSG00000107249	GLIS3	GLIS family zinc finger 3	uc003zhx.1;uc003zid.1;uc003zie.1;uc010mhh.1;uc010mhi.1;uc003zif.1;uc003zig.1;uc003zih.1;uc003zii.1	169792;169792;169792;169792;169792;169792;169792;169792;169792	0;0;0;0;0;0;0;0;0	31159.5	typicalEnhancer	24487
chr7	48113741	48135498	21758	*	5	5426	31107.4	5_GES1-WT_peak_37673_lociStitched	Promoter (<=1kb)	7	48128355	48148330	19976	1	7378	uc003toj.3	0	ENSG00000183696	UPP1	uridine phosphorylase 1	uc003toj.3;uc003tok.3;uc003tol.3;uc011kcg.1;uc003ton.3;uc011kch.2	7378;7378;7378;7378;7378;7378	0;0;0;0;0;0	31107.4	typicalEnhancer	24486
chr5	43037240	43043384	6145	*	3	2866	31105.4	3_GES1-WT_peak_32098_lociStitched	Promoter (<=1kb)	5	43041677	43045370	3694	1	153684	uc003jng.2	0	ENSG00000215068	LOC153684	uncharacterized LOC153684	uc003jng.2;uc003jni.2;uc003jnf.3	153684;153684;389289	0;0;0	31105.4	typicalEnhancer	24485
chr2	174508535	174525063	16529	*	3	5635	31058	3_GES1-WT_peak_23235_lociStitched	Distal Intergenic	2	174219561	174233718	14158	1	83879	uc010zek.1	288974	ENSG00000144354	CDCA7	cell division cycle associated 7	NA	NA	NA	31058	typicalEnhancer	24484
chr20	1789469	1810958	21490	*	7	5682	31053	7_GES1-WT_peak_24419_lociStitched	Distal Intergenic	20	1754011	1760392	6382	2	100289473	uc021vzr.1	-29077	ENSG00000232528	LOC100289473	cytoskeleton associated protein 2-like pseudogene	NA	NA	NA	31053	typicalEnhancer	24483
chr18	56234546	56258457	23912	*	8	5737	31042.6	8_GES1-WT_peak_19112_lociStitched	Exon (uc002lhj.4/115701, exon 4 of 13)	18	56195984	56205456	9473	2	115701	uc002lhk.1	-29090	ENSG00000198796	ALPK2	alpha kinase 2	uc002lhj.4	115701	0	31042.6	typicalEnhancer	24482
chr5	98098137	98110120	11984	*	3	5042	31041	3_GES1-WT_peak_32905_lociStitched	Promoter (<=1kb)	5	98104999	98116889	11891	1	285704	uc003knb.2	0	ENSG00000174136	RGMB	repulsive guidance molecule BMP co-receptor b	uc003knb.2;uc003knc.3;uc003knd.3;uc003kne.3	285704;285704;503569;503569	0;0;0;0	31041	typicalEnhancer	24481
chr21	46783658	46786815	3158	*	3	2415	31038.7	3_GES1-WT_peak_26111_lociStitched	Distal Intergenic	21	46825097	46933634	108538	1	80781	uc002zhg.3	-38282	ENSG00000182871	COL18A1	collagen type XVIII alpha 1 chain	NA	NA	NA	31038.7	typicalEnhancer	24480
chr18	9631467	9644964	13498	*	2	3914	31002.2	2_GES1-WT_peak_18507_lociStitched	Distal Intergenic	18	9546789	9614605	67817	2	9989	uc002kof.3	-16862	ENSG00000154845	PPP4R1	protein phosphatase 4 regulatory subunit 1	NA	NA	NA	31002.2	typicalEnhancer	24479
chr10	22716329	22726778	10450	*	3	5046	30984.2	3_GES1-WT_peak_4884_lociStitched	Promoter (<=1kb)	10	22724354	22726858	2505	2	100499489	uc021pof.2	80	NA	LOC100499489	uncharacterized LOC100499489	uc021pof.2	100499489	0	30984.2	typicalEnhancer	24478
chr1	52362731	52372537	9807	*	2	3602	30982.3	2_GES1-WT_peak_1394_lociStitched	Distal Intergenic	1	52257250	52344609	87360	2	4898	uc001ctf.2	-18122	ENSG00000078618	NRDC	nardilysin convertase	uc001cth.3	5865	0	30982.3	typicalEnhancer	24477
chr5	2748336	2758040	9705	*	2	5308	30958	2_GES1-WT_peak_31619_lociStitched	Promoter (<=1kb)	5	2752262	2755511	3250	1	153571	uc003jdc.3	0	ENSG00000186493	C5orf38	chromosome 5 open reading frame 38	uc003jdc.3;uc011cmg.2;uc011cmh.2;uc011cmi.2;uc011cmj.3;uc003jda.3;uc003jdb.3	153571;153571;153571;153571;153571;153572;153572	0;0;0;0;0;0;0	30958	typicalEnhancer	24476
chr12	116784284	116828896	44613	*	5	7475	30912.3	5_GES1-WT_peak_10740_lociStitched	Distal Intergenic	12	116866057	116866123	67	2	100616309	uc021rei.1	37227	ENSG00000264037	MIR4472-2	microRNA 4472-2	NA	NA	NA	30912.3	typicalEnhancer	24475
chr8	131138089	131163175	25087	*	6	5501	30899.7	6_GES1-WT_peak_40708_lociStitched	Exon (uc003ysz.2/50807, exon 8 of 24)	8	131064351	131193126	128776	2	50807	uc003ysz.2	29951	ENSG00000153317	ASAP1	ArfGAP with SH3 domain, ankyrin repeat and PH domain 1	uc003ysz.2;uc003yta.2;uc011liw.2	50807;50807;50807	0;0;0	30899.7	typicalEnhancer	24474
chr5	95401785	95415542	13758	*	3	5441	30895	3_GES1-WT_peak_32845_lociStitched	Promoter (<=1kb)	5	95414842	95414916	75	1	693168	uc021ybp.1	0	ENSG00000207578	MIR583	microRNA 583	uc021ybp.1	693168	0	30895	typicalEnhancer	24473
chr11	7990166	8009371	19206	*	3	6061	30825.6	3_GES1-WT_peak_6849_lociStitched	Promoter (<=1kb)	11	8008445	8017719	9275	1	8665	uc001mfw.3	0	ENSG00000175390	EIF3F	eukaryotic translation initiation factor 3 subunit F	uc001mfw.3;uc010rbj.2	8665;8665	0;0	30825.6	typicalEnhancer	24472
chr1	225840140	225845971	5832	*	6	3201	30818	6_GES1-WT_peak_4052_lociStitched	Promoter (<=1kb)	1	225674534	225840845	166312	2	55740	uc001hpc.1	0	ENSG00000154380	ENAH	ENAH actin regulator	uc001hpc.1;uc001hpd.1	55740;55740	0;0	30818	typicalEnhancer	24471
chr17	75315313	75328119	12807	*	4	3547	30807.2	4_GES1-WT_peak_18130_lociStitched	Promoter (<=1kb)	17	75315597	75496678	181082	1	10801	uc002jtu.4	0	ENSG00000184640	SEPTIN9	septin 9	uc002jts.4;uc010wtk.2;uc002jtt.4;uc002jtu.4	10801;10801;10801;10801	0;0;0;0	30807.2	typicalEnhancer	24470
chr8	129154191	129166077	11887	*	3	3137	30783.8	3_GES1-WT_peak_40668_lociStitched	Promoter (<=1kb)	8	129162362	129162434	73	1	100302281	uc022bbk.1	0	ENSG00000221261	MIR1208	microRNA 1208	uc022bbk.1	100302281	0	30783.8	typicalEnhancer	24469
chr1	94146047	94168581	22535	*	3	6026	30776	3_GES1-WT_peak_2018_lociStitched	Promoter (<=1kb)	1	94027343	94146926	119584	2	8412	uc001dpz.4	0	ENSG00000137936	BCAR3	BCAR3 adaptor protein, NSP family member	uc001dpz.4;uc001dqa.4;uc001dqb.4	8412;8412;8412	0;0;0	30776	typicalEnhancer	24468
chr5	77992115	78003868	11754	*	4	5368	30766.1	4_GES1-WT_peak_32664_lociStitched	Distal Intergenic	5	77781038	77944648	163611	2	10184	uc003kfo.3	-47467	ENSG00000145685	LHFPL2	LHFPL tetraspan subfamily member 2	NA	NA	NA	30766.1	typicalEnhancer	24467
chr20	3766367	3801832	35466	*	5	7121	30759.7	5_GES1-WT_peak_24457_lociStitched	Promoter (<=1kb)	20	3764498	3767337	2840	2	1059	uc002wjk.3	0	ENSG00000125817	CENPB	centromere protein B	uc002wjk.3;uc002wjj.3;uc002wjt.3;uc002wjs.2;uc002wju.2;uc021wab.1;uc010zqk.2;uc010zql.2;uc010zqm.2;uc002wjl.3;uc002wjm.3;uc021waa.1;uc002wjn.3;uc002wjo.3;uc002wjp.3;uc002wjq.3	1059;25876;55317;55317;55317;55317;994;994;994;994;994;994;994;994;994;994	0;-4265;0;0;0;0;0;0;0;0;0;0;0;0;0;0	30759.7	typicalEnhancer	24466
chr4	77356315	77381952	25638	*	4	6764	30757.9	4_GES1-WT_peak_30373_lociStitched	Promoter (<=1kb)	4	77356253	77704405	348153	1	57619	uc011cbx.2	62	ENSG00000138771	SHROOM3	shroom family member 3	uc011cbx.2	57619	0	30757.9	typicalEnhancer	24465
chr9	103188983	103192367	3385	*	1	3386	30755.1	1_GES1-WT_peak_42081_lociStitched	Promoter (<=1kb)	9	103189495	103214016	24522	1	91283	uc004baw.3	0	ENSG00000066697	MSANTD3	Myb/SANT DNA binding domain containing 3	uc004baw.3;uc022bkz.1;uc022bla.1;uc022blb.1	91283;91283;91283;91283	0;0;0;0	30755.1	typicalEnhancer	24464
chr5	165766228	165809519	43292	*	6	5025	30750.3	6_GES1-WT_peak_33845_lociStitched	Distal Intergenic	5	166711843	167420187	708345	1	57451	uc021yhi.1	-902324	ENSG00000145934	TENM2	teneurin transmembrane protein 2	NA	NA	NA	30750.3	typicalEnhancer	24463
chr4	15682109	15697893	15785	*	5	5520	30693.9	5_GES1-WT_peak_29880_lociStitched	Promoter (<=1kb)	4	15683352	15692070	8719	1	285550	uc003gof.4	0	ENSG00000237765	FAM200B	family with sequence similarity 200 member B	uc003gof.4	285550	0	30693.9	typicalEnhancer	24462
chr7	15169320	15177432	8113	*	2	3378	30677.7	2_GES1-WT_peak_36999_lociStitched	Distal Intergenic	7	14724870	14942550	217681	2	1607	uc011jxv.1	-226770	ENSG00000136267	DGKB	diacylglycerol kinase beta	NA	NA	NA	30677.7	typicalEnhancer	24461
chr5	142775958	142785447	9490	*	3	3380	30631.8	3_GES1-WT_peak_33498_lociStitched	Promoter (<=1kb)	5	142657496	142783254	125759	2	2908	uc003lmy.3	0	ENSG00000113580	NR3C1	nuclear receptor subfamily 3 group C member 1	uc003lmy.3;uc003lmz.3;uc003lna.3;uc003lnb.3;uc011dbk.2;uc003lnc.3;uc003lnd.3;uc003lne.3;uc003lnf.3;uc031slp.1;uc021yfa.1;uc021yfb.1;uc003lng.2;uc003lni.2	2908;2908;2908;2908;2908;2908;2908;2908;2908;2908;2908;2908;2908;2908	0;0;0;0;0;0;0;0;0;0;0;0;0;0	30631.8	typicalEnhancer	24460
chr1	178206946	178210178	3233	*	2	2777	30591.6	2_GES1-WT_peak_3223_lociStitched	Intron (uc009wxb.2/9462, intron 1 of 4)	1	178310606	178448648	138043	1	9462	uc001glr.3	-100428	ENSG00000075391	RASAL2	RAS protein activator like 2	uc009wxb.2;uc001glq.3	9462;9462	0;0	30591.6	typicalEnhancer	24459
chr4	84176121	84189658	13538	*	4	4213	30574.2	4_GES1-WT_peak_30470_lociStitched	3' UTR	4	84184977	84200267	15291	2	27235	uc003hof.3	10609	ENSG00000173085	COQ2	coenzyme Q2, polyprenyltransferase	uc011ccp.2;uc003hof.3;uc003hog.3	27235;27235;27235	0;0;0	30574.2	typicalEnhancer	24458
chr9	131445786	131465986	20201	*	3	4593	30568.2	3_GES1-WT_peak_42692_lociStitched	Promoter (<=1kb)	9	131464802	131483199	18398	1	29941	uc004bvw.3	0	ENSG00000160447	PKN3	protein kinase N3	uc004bvw.3;uc010myh.3;uc022bom.1;uc004bvt.4;uc022bol.1;uc004bvu.4;uc011mbj.2	29941;29941;29941;6418;6418;6418;6418	0;0;0;0;0;0;0	30568.2	typicalEnhancer	24457
chr18	46448951	46488026	39076	*	13	9735	30557.4	13_GES1-WT_peak_18982_lociStitched	Promoter (<=1kb)	18	46446223	46469177	22955	2	4092	uc002ldf.3	0	ENSG00000101665	SMAD7	SMAD family member 7	uc002ldf.3;uc010xde.2;uc002ldg.3;uc021ujr.1	4092;4092;4092;4092	0;0;0;0	30557.4	typicalEnhancer	24456
chr5	133838726	133863304	24579	*	4	5800	30512.4	4_GES1-WT_peak_33273_lociStitched	Promoter (<=1kb)	5	133860066	133915164	55099	1	23338	uc011cxt.1	0	ENSG00000043143	JADE2	jade family PHD finger 2	uc011cxt.1;uc003kzk.2;uc003kzl.2;uc003kzm.2;uc003kzn.2;uc003kzo.1	23338;23338;23338;23338;23338;23338	0;0;0;0;0;0	30512.4	typicalEnhancer	24455
chr20	48290931	48330687	39757	*	5	7485	30497.6	5_GES1-WT_peak_25185_lociStitched	Promoter (<=1kb)	20	48249483	48330421	80939	2	9334	uc002xuu.4	0	ENSG00000158470	B4GALT5	beta-1,4-galactosyltransferase 5	uc002xuu.4	9334	0	30497.6	typicalEnhancer	24454
chr7	129906553	129933741	27189	*	6	4895	30473.4	6_GES1-WT_peak_38719_lociStitched	Promoter (<=1kb)	7	129906703	129916872	10170	1	1358	uc011kpc.1	0	ENSG00000158516	CPA2	carboxypeptidase A2	uc011kpc.1;uc003vpq.3;uc003vpr.3;uc011kpd.2;uc011kpe.2	1358;1358;51200;51200;51200	0;0;0;0;0	30473.4	typicalEnhancer	24453
chr1	112083845	112115384	31540	*	4	7043	30455	4_GES1-WT_peak_2300_lociStitched	Promoter (<=1kb)	1	112025970	112106597	80628	2	140	uc001ebg.4	0	ENSG00000282608	ADORA3	adenosine A3 receptor	uc001ebg.4;uc001ebi.3	140;5906	0;0	30455	typicalEnhancer	24452
chr5	86204311	86207684	3374	*	3	2662	30411.5	3_GES1-WT_peak_32741_lociStitched	Distal Intergenic	5	86410696	86410771	76	2	100422887	uc021ybb.1	203087	ENSG00000265919	MIR4280	microRNA 4280	NA	NA	NA	30411.5	typicalEnhancer	24451
chr5	111319407	111343022	23616	*	5	5790	30365.5	5_GES1-WT_peak_32992_lociStitched	Intron (uc031skr.1/100873948, intron 3 of 3)	5	111065000	111312628	247629	2	9315	uc011cvs.2	-6779	ENSG00000134986	NREP	neuronal regeneration related protein	uc031skr.1	100873948	0	30365.5	typicalEnhancer	24450
chr17	27476158	27486542	10385	*	4	3551	30360.5	4_GES1-WT_peak_16983_lociStitched	Intron (uc010csa.1/399687, intron 2 of 39)	17	27421954	27467404	45451	2	399687	uc010wbd.1	-8754	ENSG00000196535	MYO18A	myosin XVIIIA	uc010csa.1;uc002hdt.1;uc002hdu.1	399687;399687;399687	0;0;0	30360.5	typicalEnhancer	24449
chr19	44243679	44289645	45967	*	7	6829	30352	7_GES1-WT_peak_20435_lociStitched	Promoter (<=1kb)	19	44270685	44285409	14725	2	3783	uc002oxl.3	0	ENSG00000104783	KCNN4	potassium calcium-activated channel subfamily N member 4	uc002oxl.3;uc002oxj.2;uc002oxk.2;uc010eiy.1	3783;56006;56006;56006	0;0;0;0	30352	typicalEnhancer	24448
chr14	69013761	69045217	31457	*	5	5756	30334	5_GES1-WT_peak_12881_lociStitched	Intron (uc001xkf.2/5890, intron 10 of 10)	14	69254372	69260631	6260	2	677	uc001xkh.2	215414	ENSG00000185650	ZFP36L1	ZFP36 ring finger protein like 1	uc001xkf.2;uc001xkg.2	5890;5890	0;0	30334	typicalEnhancer	24447
chr9	80321914	80329287	7374	*	4	3300	30268.8	4_GES1-WT_peak_41645_lociStitched	Distal Intergenic	9	80037995	80263232	225238	2	9630	uc004aku.3	-58682	ENSG00000156049	GNA14	G protein subunit alpha 14	NA	NA	NA	30268.8	typicalEnhancer	24446
chr5	97790275	97818553	28279	*	4	4765	30235.9	4_GES1-WT_peak_32898_lociStitched	Distal Intergenic	5	98104999	98116889	11891	1	285704	uc003knb.2	-286446	ENSG00000174136	RGMB	repulsive guidance molecule BMP co-receptor b	NA	NA	NA	30235.9	typicalEnhancer	24445
chr7	84266260	84278123	11864	*	2	4097	30224.7	2_GES1-WT_peak_38123_lociStitched	Distal Intergenic	7	84624872	84671255	46384	2	223117	uc003uib.3	393132	ENSG00000153993	SEMA3D	semaphorin 3D	NA	NA	NA	30224.7	typicalEnhancer	24444
chr16	29816259	29837406	21148	*	6	6214	30224.7	6_GES1-WT_peak_15520_lociStitched	Promoter (<=1kb)	16	29823409	29827202	3794	1	112476	uc002dud.3	0	ENSG00000167371	PRRT2	proline rich transmembrane protein 2	uc002dud.3;uc002due.4;uc002duf.2;uc002dts.4;uc010vdv.2;uc010vdw.1;uc002frc.1;uc010vdx.3;uc002dtx.4;uc002dty.4;uc031qvn.1;uc010bzb.2;uc002dug.4;uc010bzh.2;uc010vdz.2;uc002dui.3;uc002duj.3;uc010vea.2	112476;112476;112476;3835;3835;3835;3835;4150;4150;4150;4150;552900;79447;9961;9961;9961;9961;9961	0;0;0;0;0;0;0;0;0;0;0;0;0;0;0;0;0;-4878	30224.7	typicalEnhancer	24443
chr1	32016368	32055139	38772	*	7	6141	30215	7_GES1-WT_peak_970_lociStitched	Promoter (<=1kb)	1	32042086	32046561	4476	1	64129	uc010ogi.1	0	ENSG00000142910	TINAGL1	tubulointerstitial nephritis antigen like 1	uc010ogi.1;uc001bta.3;uc010ogj.2;uc010ogk.1;uc021oko.1	64129;64129;64129;64129;64129	0;0;0;0;0	30215	typicalEnhancer	24442
chr1	164734479	164756145	21667	*	5	5295	30173.5	5_GES1-WT_peak_3065_lociStitched	Promoter (<=1kb)	1	164738353	164743878	5526	2	100505795	uc021pdx.1	0	ENSG00000233693	PBX1-AS1	PBX1 antisense RNA 1	uc021pdx.1;uc001gcs.3;uc001gct.3;uc010pku.2;uc010pkv.2;uc010pkw.1	100505795;5087;5087;5087;5087;5087	0;0;0;0;0;0	30173.5	typicalEnhancer	24441
chr22	30580175	30603720	23546	*	4	4892	30171.8	4_GES1-WT_peak_26469_lociStitched	Distal Intergenic	22	30636436	30642840	6405	2	3976	uc003agz.3	39120	ENSG00000128342	LIF	LIF interleukin 6 family cytokine	NA	NA	NA	30171.8	typicalEnhancer	24440
chr5	1326550	1329391	2842	*	1	2843	30160.4	1_GES1-WT_peak_31604_lociStitched	Intron (uc003jcg.3/81037, intron 6 of 13)	5	1318000	1341975	23976	2	81037	uc003jcg.3	12584	ENSG00000049656	CLPTM1L	CLPTM1 like	uc003jcg.3;uc003jch.3	81037;81037	0;0	30160.4	typicalEnhancer	24439
chr2	150266531	150287978	21448	*	3	5153	30125.9	3_GES1-WT_peak_22889_lociStitched	Intron (uc021vqt.1/130574, intron 1 of 4)	2	150224492	150330659	106168	1	130574	uc002txa.3	42039	ENSG00000187123	LYPD6	LY6/PLAUR domain containing 6	uc021vqt.1;uc002twy.3;uc010fnt.3;uc002twz.3;uc002txa.3	130574;130574;130574;130574;130574	0;0;0;0;0	30125.9	typicalEnhancer	24438
chr1	179096613	179113760	17148	*	3	4852	30111.9	3_GES1-WT_peak_3254_lociStitched	Promoter (<=1kb)	1	179068462	179112224	43763	2	27	uc001gmg.4	0	ENSG00000143322	ABL2	ABL proto-oncogene 2, non-receptor tyrosine kinase	uc001gmg.4;uc001gmi.4;uc010pne.2;uc001gmj.4;uc010pnf.2;uc010png.2;uc010pnh.2;uc009wxe.3;uc001gmk.3;uc009wxf.2	27;27;27;27;27;27;27;27;27;27	0;0;0;0;0;0;0;0;0;0	30111.9	typicalEnhancer	24437
chr15	67039624	67072501	32878	*	6	6703	30096.5	6_GES1-WT_peak_14185_lociStitched	Intron (uc002aqf.3/4091, intron 3 of 3)	15	67000930	67074337	73408	1	4091	uc002aqg.3	38694	ENSG00000137834	SMAD6	SMAD family member 6	uc002aqf.3;uc010bhx.3;uc002aqg.3	4091;4091;4091	0;0;0	30096.5	typicalEnhancer	24436
chr22	27504231	27512493	8263	*	6	2795	30084.8	6_GES1-WT_peak_26372_lociStitched	Distal Intergenic	22	27053446	27072440	18995	1	440823	uc003add.2	450785	ENSG00000225783	MIAT	myocardial infarction associated transcript	NA	NA	NA	30084.8	typicalEnhancer	24435
chr8	131454644	131457508	2865	*	2	2534	30063.9	2_GES1-WT_peak_40725_lociStitched	Promoter (<=1kb)	8	131064351	131455906	391556	2	50807	uc003yta.2	0	ENSG00000153317	ASAP1	ArfGAP with SH3 domain, ankyrin repeat and PH domain 1	uc003yta.2;uc011liw.2	50807;50807	0;0	30063.9	typicalEnhancer	24434
chr1	27018818	27033493	14676	*	5	4402	30062.3	5_GES1-WT_peak_826_lociStitched	Promoter (<=1kb)	1	27022522	27102198	79677	1	8289	uc001bmt.1	0	ENSG00000117713	ARID1A	AT-rich interaction domain 1A	uc001bmt.1;uc001bmu.1;uc001bmv.1	8289;8289;8289	0;0;0	30062.3	typicalEnhancer	24433
chr6	32936365	32939392	3028	*	1	3029	30024.1	1_GES1-WT_peak_34921_lociStitched	Promoter (<=1kb)	6	32936437	32949282	12846	1	6046	uc003ocn.4	0	ENSG00000204256	BRD2	bromodomain containing 2	uc003ocn.4;uc010jug.1;uc003oco.3;uc003ocp.4;uc003ocq.4;uc010juh.3;uc021ywf.1	6046;6046;6046;6046;6046;6046;6046	0;0;0;0;0;0;-1469	30024.1	typicalEnhancer	24432
chr3	150087265	150090697	3433	*	2	3081	30021.9	2_GES1-WT_peak_28929_lociStitched	Distal Intergenic	3	150126788	150177615	50828	1	9819	uc003exv.3	-36091	ENSG00000196428	TSC22D2	TSC22 domain family member 2	NA	NA	NA	30021.9	typicalEnhancer	24431
chr7	23508103	23513900	5798	*	4	3257	29998.3	4_GES1-WT_peak_37160_lociStitched	Promoter (<=1kb)	7	23349828	23509995	160168	2	10643	uc003swg.3	0	ENSG00000136231	IGF2BP3	insulin like growth factor 2 mRNA binding protein 3	uc003swg.3;uc003swh.1	10643;10643	0;0	29998.3	typicalEnhancer	24430
chr5	68788748	68817648	28901	*	4	6180	29964.6	4_GES1-WT_peak_32466_lociStitched	Promoter (<=1kb)	5	68800004	68853931	53928	1	100506658	uc021xzq.1	0	ENSG00000197822	OCLN	occludin	uc003jwu.3;uc003jwv.4;uc021xzq.1;uc021xzr.1;uc021xzs.1;uc021xzt.1	100506658;100506658;100506658;100506658;100506658;100506658	0;0;0;0;0;0	29964.6	typicalEnhancer	24429
chr2	128145012	128169666	24655	*	6	4673	29946	6_GES1-WT_peak_22672_lociStitched	Distal Intergenic	2	128175996	128186822	10827	1	5624	uc002tok.3	-6330	ENSG00000115718	PROC	protein C, inactivator of coagulation factors Va and VIIIa	NA	NA	NA	29946	typicalEnhancer	24428
chr3	157502353	157513472	11120	*	2	4166	29938.4	2_GES1-WT_peak_29050_lociStitched	Distal Intergenic	3	157261133	157319021	57889	1	152078	uc010hvv.3	241220	ENSG00000174899	SLC66A1L	solute carrier family 66 member 1 like	NA	NA	NA	29938.4	typicalEnhancer	24427
chr13	38189981	38193588	3608	*	2	3221	29892.3	2_GES1-WT_peak_11320_lociStitched	Distal Intergenic	13	38153366	38183563	30198	2	10631	uc010tex.1	-6418	ENSG00000133110	POSTN	periostin	NA	NA	NA	29892.3	typicalEnhancer	24426
chr11	92000953	92011781	10829	*	4	4186	29861	4_GES1-WT_peak_8171_lociStitched	Distal Intergenic	11	92085262	92629635	544374	1	120114	uc001pdj.4	-73481	ENSG00000165323	FAT3	FAT atypical cadherin 3	NA	NA	NA	29861	typicalEnhancer	24425
chr1	19335792	19338824	3033	*	2	2646	29809.8	2_GES1-WT_peak_598_lociStitched	Distal Intergenic	1	19230774	19282826	52053	2	126917	uc001bbd.2	-52966	ENSG00000169991	IFFO2	intermediate filament family orphan 2	NA	NA	NA	29809.8	typicalEnhancer	24424
chr20	49943486	49983796	40311	*	9	7526	29781.8	9_GES1-WT_peak_25261_lociStitched	Distal Intergenic	20	50069442	50069514	73	2	100422889	uc021weu.1	85718	ENSG00000266761	MIR3194	microRNA 3194	NA	NA	NA	29781.8	typicalEnhancer	24423
chr16	72324048	72326922	2875	*	1	2876	29756.5	1_GES1-WT_peak_16051_lociStitched	Distal Intergenic	16	72152996	72206349	53354	2	83449	uc002fcf.3	-117699	ENSG00000118557	PMFBP1	polyamine modulated factor 1 binding protein 1	NA	NA	NA	29756.5	typicalEnhancer	24422
chr16	84862525	84885962	23438	*	9	4915	29724.1	9_GES1-WT_peak_16236_lociStitched	5' UTR	16	84853587	84943116	89530	1	83716	uc010voh.1	8938	ENSG00000103196	CRISPLD2	cysteine rich secretory protein LCCL domain containing 2	uc002fik.4;uc002fil.2;uc002fim.2;uc002fin.4;uc010vog.1;uc010voh.1	83716;83716;83716;83716;83716;83716	0;0;0;0;0;0	29724.1	typicalEnhancer	24421
chr11	109417154	109419978	2825	*	1	2826	29623	1_GES1-WT_peak_8420_lociStitched	Distal Intergenic	11	109292846	109299893	7048	1	399947	uc010rwb.2	124308	ENSG00000185742	C11orf87	chromosome 11 open reading frame 87	NA	NA	NA	29623	typicalEnhancer	24420
chr2	190068635	190087494	18860	*	3	4598	29585.7	3_GES1-WT_peak_23403_lociStitched	Distal Intergenic	2	189896641	190044605	147965	2	1290	uc002uqk.3	-24030	ENSG00000204262	COL5A2	collagen type V alpha 2 chain	NA	NA	NA	29585.7	typicalEnhancer	24419
chr4	177180065	177193646	13582	*	3	4323	29578.9	3_GES1-WT_peak_31386_lociStitched	Promoter (<=1kb)	4	177134826	177190373	55548	2	140458	uc003iuq.2	0	ENSG00000164122	ASB5	ankyrin repeat and SOCS box containing 5	uc003iuq.2	140458	0	29578.9	typicalEnhancer	24418
chr8	119633363	119670607	37245	*	4	7922	29561.4	4_GES1-WT_peak_40486_lociStitched	Promoter (<=1kb)	8	119201695	119634184	432490	2	401474	uc010mda.1	0	ENSG00000177570	SAMD12	sterile alpha motif domain containing 12	uc010mda.1;uc010mdb.1;uc003yom.2;uc022bae.1	401474;401474;401474;552860	0;0;0;0	29561.4	typicalEnhancer	24417
chr12	48205862	48223373	17512	*	3	5178	29549.7	3_GES1-WT_peak_9505_lociStitched	Promoter (<=1kb)	12	48176507	48213763	37257	2	51564	uc001rqj.4	0	ENSG00000061273	HDAC7	histone deacetylase 7	uc001rqj.4;uc001rqk.5;uc010slo.2	51564;51564;51564	0;0;0	29549.7	typicalEnhancer	24416
chr17	64455386	64465316	9931	*	3	4613	29537.8	3_GES1-WT_peak_17898_lociStitched	Intron (uc002jfo.1/5578, intron 2 of 14)	17	64298926	64806862	507937	1	5578	uc002jfp.1	156460	ENSG00000154229	PRKCA	protein kinase C alpha	uc002jfo.1;uc002jfp.1	5578;5578	0;0	29537.8	typicalEnhancer	24415
chr7	151424272	151453124	28853	*	5	6358	29519.5	5_GES1-WT_peak_39062_lociStitched	Promoter (<=1kb)	7	151253201	151433349	180149	2	51422	uc011kvl.2	0	ENSG00000106617	PRKAG2	protein kinase AMP-activated non-catalytic subunit gamma 2	uc011kvl.2;uc003wkj.3;uc003wkk.3;uc010lqe.1;uc003wkm.1	51422;51422;51422;51422;51422	0;0;0;0;0	29519.5	typicalEnhancer	24414
chr12	58807970	58820686	12717	*	2	3028	29498.4	2_GES1-WT_peak_9847_lociStitched	Distal Intergenic	12	58335445	58351052	15608	1	91419	uc001sqp.3	472525	ENSG00000166896	ATP23	ATP23 metallopeptidase and ATP synthase assembly factor homolog	NA	NA	NA	29498.4	typicalEnhancer	24413
chr5	167125308	167127781	2474	*	1	2475	29489.6	1_GES1-WT_peak_33878_lociStitched	Intron (uc021yhi.1/57451, intron 2 of 3)	5	167181993	167545491	363499	1	57451	uc003lzq.3	-54212	ENSG00000145934	TENM2	teneurin transmembrane protein 2	uc021yhi.1;uc010jjd.3	57451;57451	0;0	29489.6	typicalEnhancer	24412
chr2	27975850	28000110	24261	*	5	7374	29472.3	5_GES1-WT_peak_21240_lociStitched	Promoter (<=1kb)	2	27994584	28002608	8025	1	9553	uc002rlm.1	0	ENSG00000243147	MRPL33	mitochondrial ribosomal protein L33	uc002rlo.1;uc010ezi.2;uc002rlm.1;uc002rln.1	64080;64080;9553;9553	0;0;0;0	29472.3	typicalEnhancer	24411
chr1	10587213	10590921	3709	*	2	3392	29451.7	2_GES1-WT_peak_403_lociStitched	Promoter (<=1kb)	1	10588312	10690815	102504	1	5195	uc009vmw.3	0	ENSG00000142655	PEX14	peroxisomal biogenesis factor 14	uc001arm.1;uc009vmu.1;uc001arn.3;uc009vmv.3;uc010oam.2;uc010oan.2;uc009vmw.3	5195;5195;5195;5195;5195;5195;5195	0;0;0;0;0;0;0	29451.7	typicalEnhancer	24410
chr2	147329741	147338562	8822	*	2	3640	29448.7	2_GES1-WT_peak_22857_lociStitched	Distal Intergenic	2	147344625	147348558	3934	1	728773	uc002twf.4	-6063	NA	PABPC1P2	poly(A) binding protein cytoplasmic 1 pseudogene 2	NA	NA	NA	29448.7	typicalEnhancer	24409
chr5	134364626	134369881	5256	*	3	3291	29434.7	3_GES1-WT_peak_33290_lociStitched	Promoter (<=1kb)	5	134368970	134680370	311401	1	100996485	uc003laj.2	0	ENSG00000224186	PITX1-AS1	PITX1 antisense RNA 1	uc003laj.2;uc010jea.3	100996485;5307	0;0	29434.7	typicalEnhancer	24408
chr11	111427369	111433387	6019	*	4	2852	29431.1	4_GES1-WT_peak_8445_lociStitched	3' UTR	11	111412059	111432470	20412	1	143903	uc010rwh.3	15310	ENSG00000204381	LAYN	layilin	uc001plp.2;uc001plr.2;uc010rwg.2;uc010rwh.3	143903;143903;143903;143903	0;0;0;0	29431.1	typicalEnhancer	24407
chr6	106035170	106058116	22947	*	5	4864	29422.6	5_GES1-WT_peak_35792_lociStitched	Distal Intergenic	6	105725442	105850999	125558	2	5550	uc003prc.3	-184171	ENSG00000085377	PREP	prolyl endopeptidase	NA	NA	NA	29422.6	typicalEnhancer	24406
chr11	62193363	62212073	18711	*	4	3918	29408.1	4_GES1-WT_peak_7539_lociStitched	3' UTR	11	62186507	62190678	4172	1	7356	uc001ntj.3	6856	ENSG00000149021	SCGB1A1	secretoglobin family 1A member 1	uc001ntj.3;uc001ntk.2	7356;79026	6856;0	29408.1	typicalEnhancer	24405
chr15	80772527	80800890	28364	*	3	5423	29336.9	3_GES1-WT_peak_14558_lociStitched	Exon (uc002bfr.3/9915, exon 6 of 19)	15	80735305	80890277	154973	1	9915	uc002bfs.3	37222	ENSG00000172379	ARNT2	aryl hydrocarbon receptor nuclear translocator 2	uc002bfq.3;uc002bfr.3;uc010unm.2;uc002bfs.3	9915;9915;9915;9915	0;0;0;0	29336.9	typicalEnhancer	24404
chr3	124829074	124873357	44284	*	9	8946	29333.7	9_GES1-WT_peak_28511_lociStitched	Promoter (<=1kb)	3	124870309	124870396	88	2	100847039	uc031sbo.1	0	ENSG00000264986	MIR5092	microRNA 5092	uc031sbo.1;uc003eht.4;uc010hry.3;uc003ehv.4;uc003ehw.4;uc010hrz.1	100847039;84561;84561;84561;84561;84561	0;0;0;0;0;0	29333.7	typicalEnhancer	24403
chr20	17537892	17551277	13386	*	3	4855	29331.4	3_GES1-WT_peak_24668_lociStitched	Promoter (<=1kb)	20	17550599	17588652	38054	1	11034	uc002wpq.3	0	ENSG00000125868	DSTN	destrin, actin depolymerizing factor	uc002wpq.3;uc002wpr.3;uc002wpp.3;uc010zrn.2;uc010zro.2	11034;11034;631;631;631	0;0;0;0;0	29331.4	typicalEnhancer	24402
chr2	242484841	242499513	14673	*	3	4283	29329.9	3_GES1-WT_peak_24373_lociStitched	Promoter (<=1kb)	2	242483801	242498558	14758	2	100379249	uc021vzh.2	0	NA	BOK-AS1	BOK antisense RNA 1	uc021vzh.2;uc002wbq.3	100379249;666	0;0	29329.9	typicalEnhancer	24401
chr1	221261746	221275862	14117	*	7	4635	29326.7	7_GES1-WT_peak_3984_lociStitched	Distal Intergenic	1	221052743	221058400	5658	1	3142	uc001hmv.4	209003	ENSG00000136630	HLX	H2.0 like homeobox	NA	NA	NA	29326.7	typicalEnhancer	24400
chr5	150017462	150036649	19188	*	5	4000	29323.1	5_GES1-WT_peak_33658_lociStitched	Promoter (<=1kb)	5	150020207	150031903	11697	1	11346	uc003lso.4	0	ENSG00000171992	SYNPO	synaptopodin	uc003lsn.3;uc021yfu.1;uc003lso.4;uc003lsp.3;uc003lsr.3;uc003lss.3	11346;11346;11346;11346;91977;91977	0;0;0;0;0;0	29323.1	typicalEnhancer	24399
chr22	39570219	39581665	11447	*	2	4697	29304.3	2_GES1-WT_peak_26689_lociStitched	Distal Intergenic	22	39526779	39548538	21760	2	23492	uc003axc.3	-21681	ENSG00000100307	CBX7	chromobox 7	NA	NA	NA	29304.3	typicalEnhancer	24398
chr10	26756050	26758785	2736	*	1	2737	29295.7	1_GES1-WT_peak_4942_lociStitched	Intron (uc001isr.3/54518, intron 2 of 4)	10	26727266	26856732	129467	1	54518	uc001iss.3	28784	ENSG00000077420	APBB1IP	amyloid beta precursor protein binding family B member 1 interacting protein	uc001isr.3;uc009xks.1;uc001iss.3	54518;54518;54518	0;0;0	29295.7	typicalEnhancer	24397
chr3	24186372	24199122	12751	*	3	4317	29283.9	3_GES1-WT_peak_27255_lociStitched	Exon (uc003ccx.4/7068, exon 6 of 11)	3	24193881	24206950	13070	2	7068	uc003cda.1	7828	ENSG00000151090	THRB	thyroid hormone receptor beta	uc003ccx.4;uc003ccy.4;uc003ccz.4;uc010hfe.3;uc003cda.1;uc003cdc.3;uc003cdd.3;uc003cde.1	7068;7068;7068;7068;7068;7068;7068;7068	0;0;0;0;0;0;0;0	29283.9	typicalEnhancer	24396
chr12	127868217	127886694	18478	*	6	4616	29256.2	6_GES1-WT_peak_10977_lociStitched	Distal Intergenic	12	128366162	128383184	17023	1	400087	uc001uhp.2	-479468	ENSG00000256597	LINC02393	long intergenic non-protein coding RNA 2393	NA	NA	NA	29256.2	typicalEnhancer	24395
chr17	42890764	42908211	17448	*	5	4763	29234.1	5_GES1-WT_peak_17418_lociStitched	Promoter (<=1kb)	17	42875816	42907607	31792	2	10052	uc002ihk.3	0	ENSG00000182963	GJC1	gap junction protein gamma 1	uc002ihk.3;uc002ihl.3	10052;10052	0;0	29234.1	typicalEnhancer	24394
chr22	37907796	37958186	50391	*	9	8931	29221.7	9_GES1-WT_peak_26628_lociStitched	Promoter (<=1kb)	22	37956471	37965410	8940	1	11135	uc003asz.4	0	ENSG00000128283	CDC42EP1	CDC42 effector protein 1	uc003asz.4;uc003ast.1;uc003asw.1;uc003asx.1;uc003asy.1	11135;29775;29775;29775;29775	0;0;0;0;0	29221.7	typicalEnhancer	24393
chr7	83176243	83180502	4260	*	3	3336	29216.8	3_GES1-WT_peak_38101_lociStitched	Intron (uc022agy.1/9723, intron 1 of 16)	7	82993222	83270747	277526	2	9723	uc022agy.1	90245	ENSG00000170381	SEMA3E	semaphorin 3E	uc022agy.1;uc003uhy.2	9723;9723	0;0	29216.8	typicalEnhancer	24392
chr1	68147538	68152996	5459	*	4	3998	29147.8	4_GES1-WT_peak_1658_lociStitched	Promoter (<=1kb)	1	68150860	68154021	3162	1	1647	uc001ddz.2	0	ENSG00000116717	GADD45A	growth arrest and DNA damage inducible alpha	uc001ddz.2;uc009wbb.2;uc009wbc.2;uc009wbd.2	1647;1647;1647;1647	0;0;0;0	29147.8	typicalEnhancer	24391
chr17	4842713	4853823	11111	*	2	4491	29144.2	2_GES1-WT_peak_16541_lociStitched	Promoter (<=1kb)	17	4843630	4848517	4888	1	26001	uc002fzs.3	0	ENSG00000108523	RNF167	ring finger protein 167	uc010vsr.2;uc002gab.4;uc002gac.4;uc010vss.2;uc010vst.2;uc002fzs.3;uc002fzw.2;uc002fzu.3;uc002fzy.3;uc021tnz.1;uc002gaa.4;uc002fzp.2;uc002fzo.2;uc021tod.1;uc021toe.1	2027;2027;2027;2027;2027;26001;26001;26001;26001;2811;5216;8402;8402;8402;8402	-561;-561;-561;-561;-3184;0;0;0;0;7121;0;0;0;0;0	29144.2	typicalEnhancer	24390
chr9	128410807	128438689	27883	*	4	6033	29121	4_GES1-WT_peak_42593_lociStitched	Promoter (<=1kb)	9	128199673	128412740	213068	2	79109	uc011lzu.2	0	ENSG00000119487	MAPKAP1	MAPK associated protein 1	uc011lzu.2;uc011lzv.2;uc004bpv.3;uc004bpw.3;uc004bpx.3;uc004bpy.3;uc004bpz.3;uc010mxa.3;uc010mxb.1;uc004bqa.3;uc010mxc.1	79109;79109;79109;79109;79109;79109;79109;79109;79109;79109;79109	0;0;0;0;0;0;0;0;0;0;0	29121	typicalEnhancer	24389
chr12	80973103	80988934	15832	*	2	4636	29104	2_GES1-WT_peak_10185_lociStitched	Exon (uc001sze.2/374462, exon 23 of 42)	12	81101408	81103256	1849	1	4618	uc001szf.2	-112474	ENSG00000111046	MYF6	myogenic factor 6	uc001sze.2	374462	0	29104	typicalEnhancer	24388
chr1	61946231	61969224	22994	*	8	5949	29101.2	8_GES1-WT_peak_1552_lociStitched	Distal Intergenic	1	61872234	61928460	56227	1	4774	uc009wae.3	73997	ENSG00000162599	NFIA	nuclear factor I A	NA	NA	NA	29101.2	typicalEnhancer	24387
chr10	43882682	43916650	33969	*	4	5870	29097.8	4_GES1-WT_peak_5220_lociStitched	Promoter (<=1kb)	10	43881065	43892279	11215	2	3185	uc009xmh.1	0	ENSG00000169813	HNRNPF	heterogeneous nuclear ribonucleoprotein F	uc009xmh.1;uc001jar.2;uc001jas.2;uc001jat.2;uc001jav.2;uc001jau.2	3185;3185;3185;3185;3185;3185	0;0;0;0;0;0	29097.8	typicalEnhancer	24386
chr11	130642876	130672587	29712	*	8	6576	29088	8_GES1-WT_peak_8822_lociStitched	Distal Intergenic	11	130542851	130587247	44397	1	283171	uc031qfg.1	100025	ENSG00000175728	LINC02873	long intergenic non-protein coding RNA 2873	NA	NA	NA	29088	typicalEnhancer	24385
chrX	21943951	21961877	17927	*	4	5556	29079.4	4_GES1-WT_peak_43277_lociStitched	Promoter (<=1kb)	23	21958691	21996232	37542	1	6611	uc011mjq.3	0	ENSG00000102172	SMS	spermine synthase	uc011mjq.3;uc004dag.4;uc031tgx.1	6611;6611;6611	0;0;0	29079.4	typicalEnhancer	24384
chr19	48216652	48249092	32441	*	5	5741	29067.1	5_GES1-WT_peak_20617_lociStitched	Promoter (<=1kb)	19	48248793	48260435	11643	1	29997	uc002phm.2	0	ENSG00000105373	NOP53	NOP53 ribosome biogenesis factor	uc002phm.2;uc002phj.4;uc010xyu.2	29997;30846;30846	0;0;0	29067.1	typicalEnhancer	24383
chr3	69810744	69821165	10422	*	4	4013	29019	4_GES1-WT_peak_27885_lociStitched	Promoter (<=1kb)	3	69812707	70017488	204782	1	4286	uc011bgb.2	0	ENSG00000187098	MITF	melanocyte inducing transcription factor	uc003dnz.3;uc011bgb.2;uc003doa.3	4286;4286;4286	0;0;0	29019	typicalEnhancer	24382
chr14	80890919	80894093	3175	*	2	2740	29015.1	2_GES1-WT_peak_13130_lociStitched	Intron (uc001xuw.1/100628307, intron 8 of 8)	14	80663868	80697397	33530	2	1734	uc010asy.3	-193522	ENSG00000211448	DIO2	iodothyronine deiodinase 2	uc001xuw.1	100628307	0	29015.1	typicalEnhancer	24381
chr22	19867333	19880475	13143	*	2	4649	29004	2_GES1-WT_peak_26208_lociStitched	Promoter (<=1kb)	22	19863047	19868870	5824	2	10587	uc002zqq.1	0	ENSG00000184470	TXNRD2	thioredoxin reductase 2	uc002zqj.1;uc002zqo.1;uc021wlj.1;uc002zqq.1;uc002zqr.1;uc002zqs.2;uc010grv.1	10587;10587;10587;10587;10587;10587;10587	0;0;0;0;0;40574;0	29004	typicalEnhancer	24380
chr5	172880653	172884650	3998	*	3	2984	28978.7	3_GES1-WT_peak_34039_lociStitched	Distal Intergenic	5	173006646	173008614	1969	1	285593	uc011dff.2	-121996	ENSG00000253955	LOC285593	uncharacterized LOC285593	NA	NA	NA	28978.7	typicalEnhancer	24379
chr22	24861213	24883550	22338	*	5	6874	28941.1	5_GES1-WT_peak_26315_lociStitched	Promoter (<=1kb)	22	24863206	24922553	59348	1	51733	uc003aae.3	0	ENSG00000100024	UPB1	beta-ureidopropionase 1	uc003aae.3;uc002zzz.2;uc003aad.1	51733;646023;646023	0;0;0	28941.1	typicalEnhancer	24378
chr1	243881003	243883637	2635	*	2	2296	28899.4	2_GES1-WT_peak_4409_lociStitched	Intron (uc001hzz.1/10000, intron 1 of 13)	1	243651535	244006584	355050	2	10000	uc001hzz.1	122947	ENSG00000117020	AKT3	AKT serine/threonine kinase 3	uc001hzz.1;uc001iab.2;uc021plu.1	10000;10000;10000	0;0;0	28899.4	typicalEnhancer	24377
chr9	91752224	91755468	3245	*	1	3246	28864.9	1_GES1-WT_peak_41855_lociStitched	Intron (uc004aqf.2/53358, intron 1 of 11)	9	91620686	91793682	172997	2	53358	uc004aqf.2	38214	ENSG00000148082	SHC3	SHC adaptor protein 3	uc004aqf.2	53358	0	28864.9	typicalEnhancer	24376
chr7	43908757	43922614	13858	*	4	3738	28809.4	4_GES1-WT_peak_37527_lociStitched	Promoter (<=1kb)	7	43906157	43909145	2989	2	64951	uc003tit.1	0	ENSG00000062582	MRPS24	mitochondrial ribosomal protein S24	uc022acg.1;uc003tiu.3;uc003tiv.3;uc003tiw.3;uc003tix.3;uc003tiy.3;uc003tiz.3;uc011kbj.2;uc003tit.1	100534592;55665;55665;55665;55665;55665;55665;55665;64951	0;0;0;0;0;0;0;0;0	28809.4	typicalEnhancer	24375
chr10	116383077	116415022	31946	*	5	6813	28808.9	5_GES1-WT_peak_6430_lociStitched	Promoter (<=1kb)	10	116200776	116392100	191325	2	3983	uc021pze.1	0	ENSG00000099204	ABLIM1	actin binding LIM protein 1	uc021pyw.1;uc021pyx.1;uc021pyy.1;uc021pyz.1;uc021pza.1;uc021pze.1;uc021pzf.1;uc001lbz.1	3983;3983;3983;3983;3983;3983;3983;3983	0;0;0;0;0;0;0;0	28808.9	typicalEnhancer	24374
chr17	46549343	46562718	13376	*	3	4438	28761.1	3_GES1-WT_peak_17534_lociStitched	Distal Intergenic	17	46214300	46507594	293295	2	8631	uc010dbe.1	-41749	ENSG00000141293	SKAP1	src kinase associated phosphoprotein 1	NA	NA	NA	28761.1	typicalEnhancer	24373
chr10	73518634	73533301	14668	*	6	4453	28761	6_GES1-WT_peak_5640_lociStitched	Promoter (<=1kb)	10	73507314	73533337	26024	2	64115	uc001jsd.3	36	ENSG00000107738	VSIR	V-set immunoregulatory receptor	uc001jrx.4;uc001jsd.3;uc001jse.3	64072;64115;64115	0;0;0	28761	typicalEnhancer	24372
chr1	68297224	68317094	19871	*	3	5723	28723.5	3_GES1-WT_peak_1671_lociStitched	Promoter (<=1kb)	1	68297971	68668670	370700	1	100289178	uc001deb.2	0	ENSG00000232284	GNG12-AS1	GNG12, DIRAS3 and WLS antisense RNA 1	uc001deb.2;uc001dec.2;uc001dea.2	100289178;100289178;55970	0;0;0	28723.5	typicalEnhancer	24371
chr9	118354133	118379478	25346	*	4	5057	28709.4	4_GES1-WT_peak_42378_lociStitched	Distal Intergenic	9	118650544	118687377	36834	2	58483	uc004bjm.3	307899	ENSG00000204148	LINC00474	long intergenic non-protein coding RNA 474	NA	NA	NA	28709.4	typicalEnhancer	24370
chr6	18387801	18407039	19239	*	3	6607	28702.7	3_GES1-WT_peak_34596_lociStitched	Promoter (<=1kb)	6	18387581	18469105	81525	1	255488	uc003ncs.3	220	ENSG00000137393	RNF144B	ring finger protein 144B	uc003ncs.3	255488	0	28702.7	typicalEnhancer	24369
chr4	153891138	153906010	14873	*	7	5293	28678.1	7_GES1-WT_peak_31113_lociStitched	3' UTR	4	153864135	153900848	36714	1	85462	uc003inf.2	27003	ENSG00000137460	FHDC1	FH2 domain containing 1	uc003inf.2	85462	0	28678.1	typicalEnhancer	24368
chr19	13254336	13284171	29836	*	9	5974	28669.4	9_GES1-WT_peak_19791_lociStitched	Promoter (<=1kb)	19	13254872	13261188	6317	2	8677	uc002mwn.4	0	ENSG00000104915	STX10	syntaxin 10	uc002mwm.4;uc002mwn.4;uc002mwo.4;uc021upq.2;uc031rjq.1;uc002mwr.3	112939;8677;8677;8677;8677;9592	0;0;0;0;0;0	28669.4	typicalEnhancer	24367
chr15	75931780	75965944	34165	*	5	7212	28667.9	5_GES1-WT_peak_14467_lociStitched	Promoter (<=1kb)	15	75941348	75950968	9621	1	257364	uc002bau.3	0	ENSG00000173548	SNX33	sorting nexin 33	uc002baw.3;uc002bau.3;uc002bav.3;uc010bkl.2	1464;257364;257364;55272	0;0;0;0	28667.9	typicalEnhancer	24366
chrX	24151739	24168248	16510	*	6	5229	28658.1	6_GES1-WT_peak_43311_lociStitched	Promoter (<=1kb)	23	24164342	24167771	3430	2	100873922	uc031thb.1	0	ENSG00000234230	ZFX-AS1	ZFX antisense RNA 1	uc031thb.1;uc004dbd.2;uc004dbe.3;uc004dbf.3;uc010nfx.2;uc022bua.1;uc011mjv.2	100873922;7543;7543;7543;7543;7543;7543	0;0;0;0;0;0;0	28658.1	typicalEnhancer	24365
chr17	74685022	74734474	49453	*	6	7624	28618.5	6_GES1-WT_peak_18099_lociStitched	Promoter (<=1kb)	17	74722912	74729962	7051	1	124512	uc002jsr.3	0	ENSG00000181038	METTL23	methyltransferase like 23	uc002jsr.3;uc002jst.3;uc002jsu.3;uc021udk.1;uc021udl.1;uc021udm.1;uc021udn.1;uc002jsn.1;uc002jso.3;uc002jsk.1;uc031rel.1;uc002jsl.3;uc002jsm.3;uc010wtg.2;uc002jsv.3;uc002jsy.4;uc002jsw.2;uc021udo.1;uc002jsz.1;uc002jta.2;uc002jtb.3;uc002jtc.3;uc002jtd.4;uc002jte.3;uc010dha.3;uc010dhb.3	124512;124512;124512;124512;124512;124512;124512;23210;23210;439921;439921;439921;439921;6427;6427;6427;6427;693221;79157;79157;79157;79157;79157;79157;79157;79157	0;0;0;0;0;0;0;0;0;0;0;0;0;0;0;0;0;0;0;0;0;0;0;0;0;0	28618.5	typicalEnhancer	24364
chr5	179223257	179248602	25346	*	3	5549	28613.1	3_GES1-WT_peak_34192_lociStitched	Promoter (<=1kb)	5	179225278	179225346	69	2	100302156	uc021yjg.1	0	ENSG00000221394	MIR1229	microRNA 1229	uc021yjg.1;uc003mkp.3;uc003mkq.3;uc003mkr.3;uc003mks.3;uc003mko.3;uc011dgr.2;uc011dgs.2;uc003mkt.1;uc003mkw.4;uc003mkx.3;uc003mkn.1	100302156;11282;11282;11282;11282;4056;8878;8878;8878;8878;8878;9794	0;0;0;0;0;0;0;0;0;0;-883;0	28613.1	typicalEnhancer	24363
chr7	150725457	150760130	34674	*	8	5303	28602.6	8_GES1-WT_peak_39028_lociStitched	Promoter (<=1kb)	7	150750899	150751560	662	2	1020	uc022apy.1	0	ENSG00000164885	CDK5	cyclin dependent kinase 5	uc022apy.1;uc003wir.2;uc003wis.2;uc003wii.2;uc010lpw.1;uc003wik.4;uc003wil.4;uc003wim.4;uc010lpx.3;uc011kvd.2;uc003wig.5;uc011kvc.2;uc022apz.1;uc003wit.4;uc011kve.2;uc003wiu.4;uc003win.3;uc003wio.3;uc003wip.3	1020;1020;1020;11194;11194;11194;11194;11194;11194;11194;285973;285973;6522;6522;6522;6522;9311;9311;9311	0;0;0;0;0;0;0;0;0;0;-3871;-3871;0;0;0;0;0;0;0	28602.6	typicalEnhancer	24362
chr6	12266032	12297106	31075	*	8	6504	28598.3	8_GES1-WT_peak_34452_lociStitched	Promoter (<=1kb)	6	12290529	12293113	2585	1	1906	uc010jpb.3	0	ENSG00000078401	EDN1	endothelin 1	uc010jpb.3;uc003nad.3;uc003nae.4;uc003naf.4	1906;1906;1906;1906	0;0;0;0	28598.3	typicalEnhancer	24361
chr8	64131351	64146557	15207	*	4	4983	28577	4_GES1-WT_peak_39928_lociStitched	Distal Intergenic	8	64081562	64125346	43785	1	253943	uc031tbi.1	49789	ENSG00000185728	YTHDF3	YTH N6-methyladenosine RNA binding protein 3	NA	NA	NA	28577	typicalEnhancer	24360
chr3	189720761	189750703	29943	*	5	6854	28565.6	5_GES1-WT_peak_29473_lociStitched	Intron (uc011bsk.2/55214, intron 1 of 14)	3	189674517	189838908	164392	2	55214	uc011bsk.2	88205	ENSG00000090530	P3H2	prolyl 3-hydroxylase 2	uc011bsk.2;uc003fsg.3	55214;55214	0;0	28565.6	typicalEnhancer	24359
chr21	36500436	36532534	32099	*	6	5463	28561.7	6_GES1-WT_peak_25853_lociStitched	Intron (uc002yut.1/861, intron 7 of 10)	21	36160098	36421641	261544	2	861	uc002yuk.4	-78795	ENSG00000159216	RUNX1	RUNX family transcription factor 1	uc002yut.1	861	0	28561.7	typicalEnhancer	24358
chr16	57834629	57850919	16291	*	3	4735	28497.8	3_GES1-WT_peak_15784_lociStitched	Promoter (<=1kb)	16	57792129	57836439	44311	2	3801	uc002emp.3	0	ENSG00000140859	KIFC3	kinesin family member C3	uc002emo.4;uc010cdf.3;uc010vhy.2;uc002emp.3;uc002emq.3;uc010vhz.2;uc002emr.1;uc010cdg.1;uc031qwi.1	3801;3801;3801;3801;3801;3801;3801;3801;388282	0;0;0;0;0;0;0;-2435;0	28497.8	typicalEnhancer	24357
chr5	57020405	57032971	12567	*	2	3369	28496.9	2_GES1-WT_peak_32280_lociStitched	Distal Intergenic	5	56775843	56778636	2794	2	345651	uc003jrm.3	-241769	ENSG00000169067	ACTBL2	actin beta like 2	NA	NA	NA	28496.9	typicalEnhancer	24356
chr5	73926284	73937885	11602	*	4	4837	28438.8	4_GES1-WT_peak_32590_lociStitched	Promoter (<=1kb)	5	73935848	74017113	81266	1	3074	uc003kdd.3	0	ENSG00000049860	HEXB	hexosaminidase subunit beta	uc003kdd.3;uc003kdc.5;uc011css.3;uc031skc.1;uc031skd.1;uc031ske.1	3074;8507;8507;8507;8507;8507	0;0;0;0;0;0	28438.8	typicalEnhancer	24355
chr19	47614424	47645145	30722	*	4	5608	28433.2	4_GES1-WT_peak_20591_lociStitched	Promoter (<=1kb)	19	47634080	47713893	79814	1	10055	uc002pgc.3	0	ENSG00000142230	SAE1	SUMO1 activating enzyme subunit 1	uc002pgc.3;uc002pgd.3;uc010ekw.3;uc010ekx.3;uc010xyk.2;uc002pge.3;uc002pga.4;uc002pgb.2	10055;10055;10055;10055;10055;10055;23211;23211	0;0;0;0;0;0;0;0	28433.2	typicalEnhancer	24354
chr3	188598660	188619323	20664	*	3	5456	28402.7	3_GES1-WT_peak_29457_lociStitched	3' UTR	3	188665003	189041271	376269	1	285386	uc003frv.2	-45680	ENSG00000188001	TPRG1	tumor protein p63 regulated 1	uc011bsg.2;uc003frs.2;uc011bsi.2;uc011bsj.2	4026;4026;4026;4026	0;0;0;0	28402.7	typicalEnhancer	24353
chr10	124610910	124624465	13556	*	5	4910	28376.8	5_GES1-WT_peak_6588_lociStitched	Promoter (<=1kb)	10	124612013	124648239	36227	1	399815	uc001lgu.3	0	NA	C10orf88B	C10orf88B (pseudogene)	uc001lgs.3;uc010qtz.2;uc001lgt.3;uc021qai.1;uc001lgu.3	100533195;100533195;196792;196792;399815	-600;0;0;0;0	28376.8	typicalEnhancer	24352
chr19	42772000	42788458	16459	*	5	4803	28334.2	5_GES1-WT_peak_20341_lociStitched	Promoter (<=1kb)	19	42788817	42799949	11133	1	23152	uc002otf.1	-359	ENSG00000079432	CIC	capicua transcriptional repressor	uc002otf.1	23152	-359	28334.2	typicalEnhancer	24351
chr14	69259408	69283587	24180	*	5	5153	28331.7	5_GES1-WT_peak_12893_lociStitched	Promoter (<=1kb)	14	69254372	69260631	6260	2	677	uc001xkh.2	0	ENSG00000185650	ZFP36L1	ZFP36 ring finger protein like 1	uc001xkh.2;uc001xki.2;uc021rve.1	677;677;677	0;0;0	28331.7	typicalEnhancer	24350
chr9	100450989	100477598	26610	*	4	5726	28318.4	4_GES1-WT_peak_42022_lociStitched	Promoter (<=1kb)	9	100437191	100459691	22501	2	7507	uc004axr.4	0	ENSG00000136936	XPA	XPA, DNA damage recognition and repair factor	uc004axr.4;uc004axs.4	7507;7507	0;0	28318.4	typicalEnhancer	24349
chr1	232277582	232286746	9165	*	2	3939	28317.1	2_GES1-WT_peak_4188_lociStitched	Distal Intergenic	1	232533712	232598163	64452	2	57568	uc001hvf.3	311417	ENSG00000116991	SIPA1L2	signal induced proliferation associated 1 like 2	NA	NA	NA	28317.1	typicalEnhancer	24348
chr14	77480313	77508590	28278	*	4	6995	28303.5	4_GES1-WT_peak_13076_lociStitched	Promoter (<=1kb)	14	77490886	77495042	4157	2	64207	uc001xsy.4	0	ENSG00000119669	IRF2BPL	interferon regulatory factor 2 binding protein like	uc001xsy.4	64207	0	28303.5	typicalEnhancer	24347
chr11	65186680	65190624	3945	*	3	2836	28250.1	3_GES1-WT_peak_7662_lociStitched	Promoter (<=1kb)	11	65190269	65212028	21760	1	283131	uc010rog.2	0	ENSG00000245532	NEAT1	nuclear paraspeckle assembly transcript 1	uc010rog.2	283131	0	28250.1	typicalEnhancer	24346
chr16	3988803	4011461	22659	*	4	5887	28237.6	4_GES1-WT_peak_15104_lociStitched	Distal Intergenic	16	3775056	3930121	155066	2	1387	uc002cvw.3	-58682	ENSG00000005339	CREBBP	CREB binding protein	uc002cvx.3	115	0	28237.6	typicalEnhancer	24345
chr21	40159807	40212751	52945	*	7	8037	28225	7_GES1-WT_peak_25959_lociStitched	Promoter (<=1kb)	21	40177231	40196878	19648	1	2114	uc002yxf.3	0	ENSG00000157557	ETS2	ETS proto-oncogene 2, transcription factor	uc002yxf.3;uc002yxg.4	2114;2114	0;0	28225	typicalEnhancer	24344
chr3	141084952	141093544	8593	*	2	3999	28209.1	2_GES1-WT_peak_28782_lociStitched	5' UTR	3	141106489	141168632	62144	1	253461	uc010hun.3	-12945	ENSG00000177311	ZBTB38	zinc finger and BTB domain containing 38	uc003etw.3	253461	0	28209.1	typicalEnhancer	24343
chr4	54930052	54949413	19362	*	6	5079	28183.3	6_GES1-WT_peak_30224_lociStitched	Promoter (<=1kb)	4	54875958	54930815	54858	2	26511	uc003haj.2	0	ENSG00000109220	CHIC2	cysteine rich hydrophobic domain 2	uc003haj.2;uc003haa.3	26511;5156	0;0	28183.3	typicalEnhancer	24342
chr1	22257107	22283958	26852	*	8	4560	28181.2	8_GES1-WT_peak_673_lociStitched	Promoter (<=1kb)	1	22148737	22263750	115014	2	3339	uc001bfj.3	0	ENSG00000142798	HSPG2	heparan sulfate proteoglycan 2	uc001bfj.3;uc009vqd.3	3339;3339	0;0	28181.2	typicalEnhancer	24341
chr15	39177560	39198144	20585	*	4	3801	28168.5	4_GES1-WT_peak_13669_lociStitched	Distal Intergenic	15	38988799	38992239	3441	1	400359	uc001zkf.1	188761	ENSG00000175779	LINC02694	long intergenic non-protein coding RNA 2694	NA	NA	NA	28168.5	typicalEnhancer	24340
chr5	151054815	151079672	24858	*	3	5899	28159.1	3_GES1-WT_peak_33680_lociStitched	Promoter (<=1kb)	5	151040657	151066615	25959	2	6678	uc003lui.4	0	ENSG00000113140	SPARC	secreted protein acidic and cysteine rich	uc003lug.4;uc003lui.4	6678;6678	-580;0	28159.1	typicalEnhancer	24339
chr22	27529708	27536233	6526	*	3	2708	28149.9	3_GES1-WT_peak_26378_lociStitched	Distal Intergenic	22	27053446	27072440	18995	1	440823	uc003add.2	476262	ENSG00000225783	MIAT	myocardial infarction associated transcript	NA	NA	NA	28149.9	typicalEnhancer	24338
chr4	160193952	160230322	36371	*	8	8119	28147.5	8_GES1-WT_peak_31220_lociStitched	Exon (uc003iqg.4/9693, exon 2 of 24)	4	160188998	160281301	92304	1	9693	uc003iqg.4	4954	ENSG00000109756	RAPGEF2	Rap guanine nucleotide exchange factor 2	uc003iqg.4	9693	0	28147.5	typicalEnhancer	24337
chr12	46942169	46957027	14859	*	4	5140	28105.8	4_GES1-WT_peak_9466_lociStitched	Distal Intergenic	12	46751971	46766645	14675	2	54407	uc001rph.3	-175524	ENSG00000134294	SLC38A2	solute carrier family 38 member 2	NA	NA	NA	28105.8	typicalEnhancer	24336
chr3	149951031	149968254	17224	*	5	4818	28057.9	5_GES1-WT_peak_28918_lociStitched	Distal Intergenic	3	150126788	150177615	50828	1	9819	uc003exv.3	-158534	ENSG00000196428	TSC22D2	TSC22 domain family member 2	NA	NA	NA	28057.9	typicalEnhancer	24335
chr2	161586704	161610313	23610	*	5	5441	28051	5_GES1-WT_peak_23057_lociStitched	Distal Intergenic	2	161137825	161350318	212494	2	5937	uc010fox.2	-236386	ENSG00000153250	RBMS1	RNA binding motif single stranded interacting protein 1	NA	NA	NA	28051	typicalEnhancer	24334
chr5	133887089	133891726	4638	*	4	3325	28035.3	4_GES1-WT_peak_33279_lociStitched	Exon (uc011cxt.1/23338, exon 4 of 12)	5	133899862	133911416	11555	1	23338	uc003kzp.3	-8136	ENSG00000043143	JADE2	jade family PHD finger 2	uc011cxt.1;uc003kzk.2;uc003kzl.2;uc003kzm.2;uc003kzn.2;uc003kzo.1	23338;23338;23338;23338;23338;23338	0;0;0;0;0;0	28035.3	typicalEnhancer	24333
chr5	148344654	148364980	20327	*	4	5888	28035	4_GES1-WT_peak_33589_lociStitched	3' UTR	5	148361713	148411250	49538	2	79628	uc010jgw.3	46270	ENSG00000169247	SH3TC2	SH3 domain and tetratricopeptide repeats 2	uc003lpp.1;uc010jgw.3;uc003lps.3;uc003lpt.3;uc003lpu.3;uc010jgx.3	79628;79628;79628;79628;79628;79628	0;0;0;0;0;0	28035	typicalEnhancer	24332
chr9	136576124	136581532	5409	*	2	3265	28031.6	2_GES1-WT_peak_42862_lociStitched	Exon (uc004cep.4/1757, exon 9 of 21)	9	136528684	136568823	40140	2	1757	uc004cen.3	-7301	ENSG00000123453	SARDH	sarcosine dehydrogenase	uc004cep.4;uc004ceo.3;uc011mdn.2;uc011mdo.2	1757;1757;1757;1757	0;0;0;0	28031.6	typicalEnhancer	24331
chr4	129438351	129451267	12917	*	3	4125	28031.2	3_GES1-WT_peak_30861_lociStitched	Exon (uc003igh.1/uc003igh.1, exon 9 of 9)	4	129190392	129209984	19593	2	10424	uc003igg.3	-228367	ENSG00000164040	PGRMC2	progesterone receptor membrane component 2	NA	NA	NA	28031.2	typicalEnhancer	24330
chr7	26224155	26252893	28739	*	5	4547	27994.7	5_GES1-WT_peak_37204_lociStitched	Promoter (<=1kb)	7	26240831	26253227	12397	1	11335	uc003sxt.3	0	ENSG00000122565	CBX3	chromobox 3	uc003sxt.3;uc003sxu.3;uc003sxv.3;uc003sxr.4;uc003sxs.4;uc003sxq.3	11335;11335;11335;3181;3181;9603	0;0;0;0;0;0	27994.7	typicalEnhancer	24329
chr5	146110336	146130801	20466	*	4	3595	27977	4_GES1-WT_peak_33558_lociStitched	Intron (uc003loe.4/5521, intron 1 of 8)	5	145969067	146258348	289282	2	5521	uc003loe.4	127547	ENSG00000156475	PPP2R2B	protein phosphatase 2 regulatory subunit Bbeta	uc003loe.4;uc003log.5;uc010jgm.4;uc003lof.5;uc003loh.5;uc003loi.5;uc003loj.5;uc003lok.5;uc011dbu.3;uc011dbv.3	5521;5521;5521;5521;5521;5521;5521;5521;5521;5521	0;0;0;0;0;0;0;0;0;0	27977	typicalEnhancer	24328
chr18	25755298	25764572	9275	*	2	5396	27964.1	2_GES1-WT_peak_18782_lociStitched	Promoter (<=1kb)	18	25530930	25757445	226516	2	1000	uc002kwg.2	0	ENSG00000170558	CDH2	cadherin 2	uc002kwg.2	1000	0	27964.1	typicalEnhancer	24327
chr15	59576440	59593160	16721	*	4	4460	27962.5	4_GES1-WT_peak_14014_lociStitched	Intron (uc002aga.4/4643, intron 1 of 27)	15	59428168	59665071	236904	2	4643	uc002aga.4	71911	ENSG00000157483	MYO1E	myosin IE	uc002aga.4	4643	0	27962.5	typicalEnhancer	24326
chr7	80350796	80353465	2670	*	2	2330	27957.3	2_GES1-WT_peak_38054_lociStitched	Distal Intergenic	7	80275968	80303734	27767	1	948	uc022agv.1	74828	ENSG00000135218	CD36	CD36 molecule	NA	NA	NA	27957.3	typicalEnhancer	24325
chr3	139017925	139032419	14495	*	5	5417	27939.1	5_GES1-WT_peak_28751_lociStitched	Distal Intergenic	3	139062798	139075887	13090	1	56945	uc003etb.3	-30379	ENSG00000175110	MRPS22	mitochondrial ribosomal protein S22	NA	NA	NA	27939.1	typicalEnhancer	24324
chr1	183131804	183134737	2934	*	1	2935	27938.7	1_GES1-WT_peak_3307_lociStitched	Distal Intergenic	1	183155174	183210406	55233	1	3918	uc001gpz.4	-20437	ENSG00000058085	LAMC2	laminin subunit gamma 2	NA	NA	NA	27938.7	typicalEnhancer	24323
chr9	97766511	97788969	22459	*	3	4640	27934.5	3_GES1-WT_peak_41967_lociStitched	Promoter (<=1kb)	9	97766415	97845950	79536	1	84909	uc011luk.2	96	ENSG00000148120	AOPEP	aminopeptidase O (putative)	uc004auy.3;uc004auz.1;uc004ava.3;uc011luj.2;uc011luk.2	84909;84909;84909;84909;84909	0;0;0;0;0	27934.5	typicalEnhancer	24322
chrX	13414527	13418112	3586	*	2	3110	27929.6	2_GES1-WT_peak_43169_lociStitched	Distal Intergenic	23	13353360	13359944	6585	1	100133123	uc022btc.1	61167	ENSG00000226985	LINC01203	long intergenic non-protein coding RNA 1203	NA	NA	NA	27929.6	typicalEnhancer	24321
chrX	58564380	58580337	15958	*	5	2217	27926.5	5_GES1-WT_peak_43691_lociStitched	Distal Intergenic	23	57931864	57937067	5204	2	7789	uc004dve.3	-627313	ENSG00000198205	ZXDA	zinc finger X-linked duplicated A	NA	NA	NA	27926.5	typicalEnhancer	24320
chr12	106468081	106485604	17524	*	5	4322	27921	5_GES1-WT_peak_10552_lociStitched	Exon (uc001tlj.1/9891, exon 3 of 7)	12	106457125	106533811	76687	2	9891	uc001tlj.1	48207	ENSG00000074590	NUAK1	NUAK family kinase 1	uc001tlj.1	9891	0	27921	typicalEnhancer	24319
chr6	144605571	144616493	10923	*	2	5347	27908.3	2_GES1-WT_peak_36375_lociStitched	Promoter (<=1kb)	6	144607490	144801118	193629	1	7402	uc010khq.1	0	ENSG00000152818	UTRN	utrophin	uc010khq.1;uc003qkt.3	7402;7402	0;0	27908.3	typicalEnhancer	24318
chr2	29331256	29353895	22640	*	5	6290	27897	5_GES1-WT_peak_21308_lociStitched	Promoter (<=1kb)	2	29336862	29383333	46472	1	79745	uc010ezm.1	0	ENSG00000115295	CLIP4	CAP-Gly domain containing linker protein family member 4	uc002rmu.3;uc010ezm.1;uc002rmv.3;uc002rmw.3;uc010ymn.1	79745;79745;79745;79745;79745	0;0;0;0;0	27897	typicalEnhancer	24317
chr11	128077254	128089706	12453	*	6	4084	27873.5	6_GES1-WT_peak_8764_lociStitched	Distal Intergenic	11	128328656	128392205	63550	2	2113	uc009zcg.2	302499	ENSG00000134954	ETS1	ETS proto-oncogene 1, transcription factor	NA	NA	NA	27873.5	typicalEnhancer	24316
chr17	71287299	71307268	19970	*	5	5610	27854.2	5_GES1-WT_peak_18007_lociStitched	Promoter (<=1kb)	17	71279763	71307054	27292	2	23580	uc002jjn.3	0	ENSG00000179604	CDC42EP4	CDC42 effector protein 4	uc002jjn.3;uc002jjo.3;uc002jjp.1	23580;23580;23580	0;0;0	27854.2	typicalEnhancer	24315
chrX	149203540	149208098	4559	*	2	4190	27826.3	2_GES1-WT_peak_44198_lociStitched	Intron (uc004fea.2/100272228, intron 10 of 13)	23	149115589	149121272	5684	1	100272228	uc004fed.1	87951	ENSG00000235703	LINC00894	long intergenic non-protein coding RNA 894	uc004fea.2	100272228	0	27826.3	typicalEnhancer	24314
chr13	75930117	75940980	10864	*	4	4893	27817.3	4_GES1-WT_peak_11652_lociStitched	Exon (uc001vjl.1/9882, exon 2 of 21)	13	75858809	75890739	31931	2	9882	uc010thu.1	-39378	ENSG00000136111	TBC1D4	TBC1 domain family member 4	uc001vjl.1;uc010aer.2;uc010aes.2	9882;9882;9882	0;0;0	27817.3	typicalEnhancer	24313
chr5	166634442	166637043	2602	*	1	2603	27751.9	1_GES1-WT_peak_33867_lociStitched	Distal Intergenic	5	166711843	167420187	708345	1	57451	uc021yhi.1	-74800	ENSG00000145934	TENM2	teneurin transmembrane protein 2	NA	NA	NA	27751.9	typicalEnhancer	24312
chr6	16740715	16771060	30346	*	5	7464	27715	5_GES1-WT_peak_34554_lociStitched	Promoter (<=1kb)	6	16299343	16761721	462379	2	6310	uc003nbt.3	0	ENSG00000124788	ATXN1	ataxin 1	uc003nbt.3;uc010jpi.3;uc010jpj.1;uc003nbu.1;uc003nbv.1;uc003nbw.1	6310;6310;6310;6310;6310;6310	0;0;0;0;0;0	27715	typicalEnhancer	24311
chr7	104644085	104655297	11213	*	2	3367	27710.7	2_GES1-WT_peak_38435_lociStitched	Promoter (<=1kb)	7	104650989	104654588	3600	2	100216545	uc003vck.2	0	NA	KMT2E-AS1	KMT2E antisense RNA 1	uc003vck.2;uc010lja.1;uc010ljb.1;uc003vcl.3;uc003vcm.3;uc010ljc.3	100216545;55904;55904;55904;55904;55904	0;0;0;0;0;0	27710.7	typicalEnhancer	24310
chr5	60596983	60610898	13916	*	4	4514	27677.5	4_GES1-WT_peak_32339_lociStitched	Distal Intergenic	5	60628100	60841999	213900	1	57688	uc003jsr.3	-17202	ENSG00000130449	ZSWIM6	zinc finger SWIM-type containing 6	NA	NA	NA	27677.5	typicalEnhancer	24309
chr1	16159241	16176652	17412	*	4	4742	27667.7	4_GES1-WT_peak_503_lociStitched	Promoter (<=1kb)	1	16174359	16266950	92592	1	23013	uc001axk.1	0	ENSG00000065526	SPEN	spen family transcriptional repressor	uc001axk.1;uc001axj.2	23013;729614	0;0	27667.7	typicalEnhancer	24308
chr9	123630605	123640162	9558	*	3	2828	27613.1	3_GES1-WT_peak_42464_lociStitched	Promoter (<=1kb)	9	123617931	123631159	13229	2	26147	uc004bkr.2	0	ENSG00000119403	PHF19	PHD finger protein 19	uc004bkr.2;uc011lyf.1;uc004bks.1;uc004bkt.3	26147;26147;26147;26147	0;0;0;0	27613.1	typicalEnhancer	24307
chr3	110132195	110140335	8141	*	2	4388	27599.6	2_GES1-WT_peak_28248_lociStitched	Distal Intergenic	3	110764163	110788806	24644	2	100506555	uc021xcg.1	648471	NA	NECTIN3-AS1	NECTIN3 antisense RNA 1	NA	NA	NA	27599.6	typicalEnhancer	24306
chr17	73679519	73697398	17880	*	4	4352	27588.8	4_GES1-WT_peak_18055_lociStitched	3' UTR	17	73663399	73704139	40741	1	29115	uc021udb.1	16120	ENSG00000161526	SAP30BP	SAP30 binding protein	uc010dgm.1;uc010wsf.1;uc002jpe.3;uc002jpf.3;uc021udb.1	29115;29115;29115;29115;29115	0;0;0;0;0	27588.8	typicalEnhancer	24305
chrX	40767055	40793874	26820	*	4	6713	27579	4_GES1-WT_peak_43452_lociStitched	Distal Intergenic	23	40690470	40692449	1980	2	100132831	uc011mkp.2	-74606	NA	TNIP2P1	TNIP2 pseudogene 1	NA	NA	NA	27579	typicalEnhancer	24304
chr1	210037662	210075057	37396	*	7	8637	27508.5	7_GES1-WT_peak_3802_lociStitched	Distal Intergenic	1	210001312	210030910	29599	1	27042	uc009xcu.2	36350	ENSG00000117597	UTP25	UTP25 small subunit processor component	NA	NA	NA	27508.5	typicalEnhancer	24303
chr1	156865869	156868570	2702	*	1	2703	27475.3	1_GES1-WT_peak_2928_lociStitched	Intron (uc001fqj.1/375033, intron 1 of 22)	1	156863523	156886226	22704	1	375033	uc001fqj.1	2346	ENSG00000187800	PEAR1	platelet endothelial aggregation receptor 1	uc001fqj.1	375033	0	27475.3	typicalEnhancer	24302
chr9	100745632	100753357	7726	*	2	2518	27474.4	2_GES1-WT_peak_42037_lociStitched	Promoter (<=1kb)	9	100745489	100778224	32736	1	10541	uc004aya.3	143	ENSG00000136938	ANP32B	acidic nuclear phosphoprotein 32 family member B	uc004aya.3	10541	0	27474.4	typicalEnhancer	24301
chr1	68165904	68233041	67138	*	8	7501	27452.7	8_GES1-WT_peak_1668_lociStitched	5' UTR	1	68150860	68154021	3162	1	1647	uc009wbd.2	15044	ENSG00000116717	GADD45A	growth arrest and DNA damage inducible alpha	uc001dea.2	55970	0	27452.7	typicalEnhancer	24300
chr11	82689804	82692572	2769	*	1	2770	27404.5	1_GES1-WT_peak_8039_lociStitched	3' UTR	11	82698066	82708455	10390	2	27314	uc009yvg.1	15883	ENSG00000137502	RAB30	RAB30, member RAS oncogene family	uc009yve.3;uc001ozu.3;uc001ozv.3;uc010rst.2	27314;27314;27314;27314	0;0;0;0	27404.5	typicalEnhancer	24299
chr7	102475012	102478296	3285	*	3	2533	27403.5	3_GES1-WT_peak_38399_lociStitched	Intron (uc010liq.1/222235, intron 6 of 7)	7	102553344	102585556	32213	1	10234	uc003vat.3	-75048	ENSG00000128606	LRRC17	leucine rich repeat containing 17	uc010liq.1;uc003vaq.2;uc003var.2;uc003vas.2;uc010lir.1	222235;222235;222235;222235;222235	0;0;0;0;0	27403.5	typicalEnhancer	24298
chr2	241309034	241327918	18885	*	3	4268	27387	3_GES1-WT_peak_24352_lociStitched	Distal Intergenic	2	241375115	241407495	32381	1	2817	uc002vyw.4	-47197	ENSG00000063660	GPC1	glypican 1	NA	NA	NA	27387	typicalEnhancer	24297
chr15	40615910	40633123	17214	*	4	3852	27382.3	4_GES1-WT_peak_13739_lociStitched	Promoter (<=1kb)	15	40623653	40630334	6682	2	388115	uc010ucn.2	0	ENSG00000188549	CCDC9B	coiled-coil domain containing 9B	uc010ucn.2;uc001zlh.4;uc001zli.1	388115;388115;388115	0;0;0	27382.3	typicalEnhancer	24296
chr6	111910195	111927648	17454	*	4	4840	27371.4	4_GES1-WT_peak_35882_lociStitched	Promoter (<=1kb)	6	111876581	111927477	50897	2	10758	uc003pvf.4	0	ENSG00000056972	TRAF3IP2	TRAF3 interacting protein 2	uc003pvf.4;uc003pvg.4;uc011ebc.3;uc010kdw.4;uc010kdx.3;uc021zdu.1;uc021zdv.1	10758;10758;10758;10758;10758;643749;643749	0;0;0;0;0;0;0	27371.4	typicalEnhancer	24295
chr12	60322702	60336002	13301	*	3	2853	27364.1	3_GES1-WT_peak_9869_lociStitched	Distal Intergenic	12	60083118	60183635	100518	1	9194	uc010ssi.3	239584	ENSG00000118596	SLC16A7	solute carrier family 16 member 7	NA	NA	NA	27364.1	typicalEnhancer	24294
chr2	235929498	235936631	7134	*	3	2804	27356	3_GES1-WT_peak_24223_lociStitched	Intron (uc002vvp.3/23677, intron 2 of 5)	2	235887347	235964358	77012	1	23677	uc002vvq.3	42151	ENSG00000130147	SH3BP4	SH3 domain binding protein 4	uc002vvp.3;uc010fym.3;uc002vvq.3	23677;23677;23677	0;0;0	27356	typicalEnhancer	24293
chr1	36808620	36819050	10431	*	2	3803	27350.1	2_GES1-WT_peak_1095_lociStitched	3' UTR	1	36805231	36826941	21711	2	83931	uc001can.1	7891	ENSG00000196182	STK40	serine/threonine kinase 40	uc001cak.1;uc001cal.1;uc001cam.1;uc001can.1	83931;83931;83931;83931	0;0;0;0	27350.1	typicalEnhancer	24292
chr10	63628950	63663588	34639	*	6	6494	27323.2	6_GES1-WT_peak_5479_lociStitched	Promoter (<=1kb)	10	63661013	63810997	149985	1	84159	uc010qil.2	0	ENSG00000150347	ARID5B	AT-rich interaction domain 5B	uc010qil.2;uc001jlt.2	84159;84159	0;0	27323.2	typicalEnhancer	24291
chr21	26740542	26758155	17614	*	3	4119	27322.8	3_GES1-WT_peak_25643_lociStitched	Exon (uc002ylk.3/54072, exon 5 of 5)	21	26758133	26804013	45881	2	54072	uc002ylk.3	45858	ENSG00000185433	LINC00158	long intergenic non-protein coding RNA 158	uc002ylk.3;uc010glg.3	54072;54072	0;0	27322.8	typicalEnhancer	24290
chr10	106194057	106210017	15961	*	6	3694	27267.8	6_GES1-WT_peak_6318_lociStitched	Exon (uc001kyh.3/159686, exon 16 of 18)	10	106113522	106214848	101327	1	159686	uc001kyh.3	80535	ENSG00000120051	CFAP58	cilia and flagella associated protein 58	uc001kyh.3	159686	0	27267.8	typicalEnhancer	24289
chr2	159268264	159272093	3830	*	2	3122	27259.6	2_GES1-WT_peak_22979_lociStitched	Intron (uc002tzq.3/130940, intron 1 of 13)	2	159027869	159313265	285397	2	130940	uc002tzq.3	41172	ENSG00000153237	CCDC148	coiled-coil domain containing 148	uc002tzq.3;uc002tzr.3;uc010foh.3;uc010foi.2;uc010foj.2;uc010fok.2;uc002tzs.2	130940;130940;130940;130940;130940;130940;130940	0;0;0;0;0;0;0	27259.6	typicalEnhancer	24288
chr17	79518841	79544939	26099	*	3	6675	27250	3_GES1-WT_peak_18266_lociStitched	Promoter (<=1kb)	17	79523913	79530904	6992	2	55666	uc002kar.3	0	ENSG00000182446	NPLOC4	NPL4 homolog, ubiquitin recognition factor	uc002kar.3;uc010dic.3;uc002kas.3;uc002kat.4;uc002kau.3;uc010wur.1;uc002kao.1;uc010wuq.1;uc002kap.3;uc002kaq.3	55666;55666;55666;55666;55666;55666;80233;80233;80233;80233	0;0;0;0;0;0;-3317;-612;0;0	27250	typicalEnhancer	24287
chr3	106446112	106448825	2714	*	1	2715	27213	1_GES1-WT_peak_28207_lociStitched	Distal Intergenic	3	106555658	106959485	403828	2	100302640	uc003dwf.4	510660	NA	LINC00882	long intergenic non-protein coding RNA 882	NA	NA	NA	27213	typicalEnhancer	24286
chr4	7843672	7847168	3497	*	1	3498	27201.4	1_GES1-WT_peak_29809_lociStitched	Exon (uc003gkg.1/60312, exon 5 of 17)	4	7755817	7780654	24838	1	84740	uc003gkd.4	87855	ENSG00000272620	AFAP1-AS1	AFAP1 antisense RNA 1	uc003gkg.1;uc011bwk.1	60312;60312	0;0	27201.4	typicalEnhancer	24285
chr9	91137765	91149216	11452	*	3	4673	27183.6	3_GES1-WT_peak_41841_lociStitched	Promoter (<=1kb)	9	91150016	91159462	9447	1	158046	uc011ltj.2	-800	ENSG00000130045	NXNL2	nucleoredoxin like 2	uc011ltj.2;uc004aqa.3	158046;158046	-800;-800	27183.6	typicalEnhancer	24284
chr20	42794191	42817349	23159	*	3	4968	27181.7	3_GES1-WT_peak_25031_lociStitched	Promoter (<=1kb)	20	42740337	42816218	75882	2	57158	uc002xli.1	0	ENSG00000149596	JPH2	junctophilin 2	uc002xli.1;uc002xlj.3	57158;57158	0;0	27181.7	typicalEnhancer	24283
chr5	83583418	83603203	19786	*	6	4078	27150.3	6_GES1-WT_peak_32726_lociStitched	Intron (uc003kio.1/10085, intron 1 of 10)	5	83238126	83680611	442486	2	10085	uc003kio.1	77408	ENSG00000164176	EDIL3	EGF like repeats and discoidin domains 3	uc003kio.1;uc003kip.1	10085;10085	0;0	27150.3	typicalEnhancer	24282
chr7	99678861	99700005	21145	*	3	5154	27146	3_GES1-WT_peak_38283_lociStitched	Promoter (<=1kb)	7	99686583	99687861	1279	1	10980	uc011kjf.1	0	ENSG00000168090	COPS6	COP9 signalosome subunit 6	uc011kjf.1;uc003usu.3;uc003uta.1;uc003usy.1;uc003usz.1;uc003usv.1;uc003usw.1;uc003usx.1;uc003utg.3;uc003uth.3;uc003uti.3;uc003utm.3;uc003utk.3;uc011kji.2;uc003usp.4;uc003usq.4;uc003usr.4;uc003uss.4;uc010lgj.4;uc031syk.1;uc031syl.1;uc003ust.5;uc031sym.1;uc011kjg.1;uc010lgl.1;uc003utb.4;uc003utd.3;uc003ute.4;uc011kjh.2;uc003utf.4	10980;10980;406900;407014;407050;4176;4176;4176;6878;6878;6878;6878;6878;6878;7551;7551;7551;7551;7551;7551;7551;7551;7551;9179;9179;9179;9179;9179;9179;9179	0;0;0;0;0;0;0;0;11572;12135;0;0;0;0;0;0;0;0;0;0;0;0;0;0;0;0;0;0;0;0	27146	typicalEnhancer	24281
chr12	6432347	6451587	19241	*	3	4175	27143.3	3_GES1-WT_peak_8939_lociStitched	Promoter (<=1kb)	12	6437923	6443422	5500	2	7132	uc001qnt.3	0	ENSG00000067182	TNFRSF1A	TNF receptor superfamily member 1A	uc001qnr.3;uc001qns.3;uc010sew.2;uc010sex.2;uc001qnv.3;uc001qnw.3;uc001qnx.3;uc010sfb.2;uc001qnt.3;uc001qnu.3;uc009zek.3;uc010sey.2;uc010sez.2;uc010sfa.2	55200;55200;55200;55200;6337;6337;6337;6337;7132;7132;7132;7132;7132;7132	0;12443;0;0;0;0;0;0;0;0;0;0;0;0	27143.3	typicalEnhancer	24280
chr10	28488912	28492366	3455	*	1	3456	27096.2	1_GES1-WT_peak_4982_lociStitched	Exon (uc009xkz.1/143098, exon 2 of 16)	10	28339923	28527664	187742	2	143098	uc009xkz.1	35298	ENSG00000150054	MPP7	membrane palmitoylated protein 7	uc009xkz.1;uc001iua.1;uc001iub.1;uc009xla.2;uc010qdv.1	143098;143098;143098;143098;143098	0;0;0;0;0	27096.2	typicalEnhancer	24279
chr6	3911438	3926887	15450	*	3	5283	27093.1	3_GES1-WT_peak_34290_lociStitched	Distal Intergenic	6	3849632	3851551	1920	1	26240	uc003mvu.3	61806	ENSG00000145945	FAM50B	family with sequence similarity 50 member B	NA	NA	NA	27093.1	typicalEnhancer	24278
chr6	142330167	142336828	6662	*	3	2709	27071.7	3_GES1-WT_peak_36324_lociStitched	Exon (uc021zgh.1/uc021zgh.1, exon 1 of 1)	6	142396745	142409936	13192	2	4829	uc003qiu.3	73108	ENSG00000135577	NMBR	neuromedin B receptor	NA	NA	NA	27071.7	typicalEnhancer	24277
chr12	109115836	109125768	9933	*	3	3921	27071.4	3_GES1-WT_peak_10611_lociStitched	Promoter (<=1kb)	12	109038885	109124619	85735	2	23603	uc031qjk.1	0	ENSG00000110880	CORO1C	coronin 1C	uc031qjk.1;uc001tnj.4;uc010sxf.3	23603;23603;23603	0;0;0	27071.4	typicalEnhancer	24276
chr1	244326015	244338605	12591	*	2	4496	27065.6	2_GES1-WT_peak_4426_lociStitched	Distal Intergenic	1	244216507	244220780	4274	1	10472	uc001iae.4	109508	ENSG00000179456	ZBTB18	zinc finger and BTB domain containing 18	NA	NA	NA	27065.6	typicalEnhancer	24275
chr16	82686288	82689054	2767	*	1	2768	27032.2	1_GES1-WT_peak_16193_lociStitched	Intron (uc010chh.3/1012, intron 1 of 4)	16	82660399	83830215	1169817	1	1012	uc010vnu.2	25889	ENSG00000140945	CDH13	cadherin 13	uc010chh.3;uc021tlw.1;uc002fgx.3;uc010vns.2;uc010vnt.2;uc010vnu.2	1012;1012;1012;1012;1012;1012	0;0;0;0;0;0	27032.2	typicalEnhancer	24274
chr6	142732993	142738192	5200	*	4	3095	27023.9	4_GES1-WT_peak_36337_lociStitched	Promoter (<=1kb)	6	142738246	142767403	29158	1	57211	uc011edv.2	-54	ENSG00000112414	ADGRG6	adhesion G protein-coupled receptor G6	uc010khc.3;uc010khd.3;uc010khe.3;uc010khf.3;uc011edv.2	57211;57211;57211;57211;57211	0;0;0;0;-54	27023.9	typicalEnhancer	24273
chr2	235578236	235599694	21459	*	5	5362	27016.9	5_GES1-WT_peak_24204_lociStitched	Distal Intergenic	2	235401686	235405693	4008	2	10123	uc002vvn.3	-172543	ENSG00000188042	ARL4C	ADP ribosylation factor like GTPase 4C	NA	NA	NA	27016.9	typicalEnhancer	24272
chr1	79180130	79189861	9732	*	4	4320	26985.9	4_GES1-WT_peak_1810_lociStitched	Distal Intergenic	1	79115477	79129763	14287	1	10561	uc001dip.4	64653	ENSG00000137965	IFI44	interferon induced protein 44	NA	NA	NA	26985.9	typicalEnhancer	24271
chr7	151289294	151298196	8903	*	3	3813	26976.1	3_GES1-WT_peak_39054_lociStitched	Promoter (<=1kb)	7	151253210	151292537	39328	2	51422	uc003wkl.2	0	ENSG00000106617	PRKAG2	protein kinase AMP-activated non-catalytic subunit gamma 2	uc003wki.3;uc011kvl.2;uc003wkj.3;uc003wkk.3;uc003wkl.2;uc010lqe.1	51422;51422;51422;51422;51422;51422	0;0;0;0;0;0	26976.1	typicalEnhancer	24270
chr14	38052774	38068048	15275	*	5	3125	26975.7	5_GES1-WT_peak_12406_lociStitched	Promoter (<=1kb)	14	38058757	38063467	4711	2	3169	uc010tpz.3	0	ENSG00000129514	FOXA1	forkhead box A1	uc010tpz.3;uc001wuf.4	3169;3169	0;0	26975.7	typicalEnhancer	24269
chr8	16569182	16576491	7310	*	3	2923	26952.7	3_GES1-WT_peak_39297_lociStitched	Distal Intergenic	8	16850334	16859674	9341	2	26281	uc003wxc.1	283183	ENSG00000078579	FGF20	fibroblast growth factor 20	NA	NA	NA	26952.7	typicalEnhancer	24268
chr10	28031421	28035383	3963	*	1	3964	26939.7	1_GES1-WT_peak_4962_lociStitched	Promoter (<=1kb)	10	27961803	28034778	72976	2	283078	uc001itx.4	0	ENSG00000150051	MKX	mohawk homeobox	uc001itx.4;uc001ity.4	283078;283078	0;0	26939.7	typicalEnhancer	24267
chr9	134532830	134554787	21958	*	3	6313	26931.5	3_GES1-WT_peak_42816_lociStitched	Intron (uc022bos.1/2889, intron 1 of 23)	9	134452157	134585229	133073	2	2889	uc022bos.1	30442	ENSG00000107263	RAPGEF1	Rap guanine nucleotide exchange factor 1	uc022bos.1;uc022bot.1;uc022bou.1;uc022bov.1	2889;2889;2889;2889	0;0;0;0	26931.5	typicalEnhancer	24266
chr6	56706100	56734404	28305	*	7	4833	26923.7	7_GES1-WT_peak_35426_lociStitched	Promoter (<=1kb)	6	56322785	56708463	385679	2	667	uc021zaz.2	0	ENSG00000151914	DST	dystonin	uc021zaz.2;uc021zay.2;uc021zba.2;uc011dxl.1	667;667;667;667	0;0;0;0	26923.7	typicalEnhancer	24265
chr9	33505820	33524843	19024	*	3	3967	26922.8	3_GES1-WT_peak_41253_lociStitched	Promoter (<=1kb)	9	33504535	33511164	6630	2	441394	uc022bfm.1	0	NA	SUGT1P1	SUGT1 pseudogene 1	uc022bfm.1;uc010mjw.2	441394;441459	0;0	26922.8	typicalEnhancer	24264
chr9	79540902	79544158	3257	*	1	3258	26922	1_GES1-WT_peak_41637_lociStitched	Distal Intergenic	9	79438180	79521003	82824	2	158471	uc004akn.3	-19899	ENSG00000106772	PRUNE2	prune homolog 2 with BCH domain	NA	NA	NA	26922	typicalEnhancer	24263
chr16	67301810	67323954	22145	*	5	4819	26915	5_GES1-WT_peak_15904_lociStitched	Promoter (<=1kb)	16	67311413	67323403	11991	1	25894	uc002eso.4	0	ENSG00000196155	PLEKHG4	pleckstrin homology and RhoGEF domain containing G4	uc002est.2;uc002esu.2;uc010vjj.1;uc002eso.4;uc002esp.4;uc002esq.4;uc002esr.1;uc010cef.3;uc002ess.4;uc010ceg.3;uc002esm.3;uc010cee.3;uc010vji.2	146212;146212;146212;25894;25894;25894;25894;25894;25894;25894;6553;6553;6553	0;0;0;0;0;0;0;0;0;0;0;0;0	26915	typicalEnhancer	24262
chr7	137351738	137373459	21722	*	4	5057	26913.6	4_GES1-WT_peak_38850_lociStitched	5' UTR	7	137074385	137531609	457225	2	9162	uc003vtt.3	158150	ENSG00000157680	DGKI	diacylglycerol kinase iota	uc003vtt.3;uc003vtu.3	9162;9162	0;0	26913.6	typicalEnhancer	24261
chr22	27852399	27872749	20351	*	3	6016	26881.6	3_GES1-WT_peak_26392_lociStitched	Distal Intergenic	22	28144265	28187871	43607	2	4330	uc010gvg.4	315122	ENSG00000169184	MN1	MN1 proto-oncogene, transcriptional regulator	NA	NA	NA	26881.6	typicalEnhancer	24260
chr15	99261775	99272396	10622	*	2	4328	26874.7	2_GES1-WT_peak_14885_lociStitched	Intron (uc010urq.2/3480, intron 2 of 10)	15	99327655	99327731	77	1	100616432	uc021sxh.1	-55259	ENSG00000264480	MIR4714	microRNA 4714	uc010urq.2;uc002bul.3;uc010bon.3	3480;3480;3480	0;0;0	26874.7	typicalEnhancer	24259
chr17	14736234	14745427	9194	*	2	3746	26858.4	2_GES1-WT_peak_16726_lociStitched	Distal Intergenic	17	14934292	14935274	983	1	94150	uc021tqj.1	-188865	ENSG00000259944	CDRT7	CMT1A duplicated region transcript 7	NA	NA	NA	26858.4	typicalEnhancer	24258
chr5	169397261	169407341	10081	*	3	5382	26849.7	3_GES1-WT_peak_33950_lociStitched	Promoter (<=1kb)	5	169290719	169407744	117026	2	100131897	uc003mag.2	403	ENSG00000204767	INSYN2B	inhibitory synaptic factor family member 2B	uc003mag.2;uc003maf.3;uc011der.2;uc010jjm.3	100131897;1794;1794;1794	0;0;0;0	26849.7	typicalEnhancer	24257
chr12	58757612	58760419	2808	*	2	2338	26820.9	2_GES1-WT_peak_9843_lociStitched	Distal Intergenic	12	58335445	58351052	15608	1	91419	uc001sqp.3	422167	ENSG00000166896	ATP23	ATP23 metallopeptidase and ATP synthase assembly factor homolog	NA	NA	NA	26820.9	typicalEnhancer	24256
chr2	67615884	67628346	12463	*	3	4026	26806.7	3_GES1-WT_peak_21931_lociStitched	Promoter (<=1kb)	2	67624442	67637533	13092	1	54465	uc002sdz.1	0	ENSG00000143971	ETAA1	ETAA1 activator of ATR kinase	uc002sdz.1	54465	0	26806.7	typicalEnhancer	24255
chr12	102960068	102962908	2841	*	2	2483	26805.7	2_GES1-WT_peak_10452_lociStitched	Distal Intergenic	12	102811454	102874378	62925	2	3479	uc001tjp.4	-85690	ENSG00000017427	IGF1	insulin like growth factor 1	NA	NA	NA	26805.7	typicalEnhancer	24254
chr3	156534004	156545045	11042	*	4	4323	26786.8	4_GES1-WT_peak_29027_lociStitched	Promoter (<=1kb)	3	156544096	156763918	219823	1	389170	uc003fba.1	0	ENSG00000197980	LEKR1	leucine, glutamate and lysine rich 1	uc003fba.1;uc021xgh.1;uc003fbb.3;uc003fay.1;uc003fax.2	389170;389170;389170;647033;730091	0;0;0;-4194;0	26786.8	typicalEnhancer	24253
chr12	100003653	100006943	3291	*	1	3292	26729.8	1_GES1-WT_peak_10412_lociStitched	Intron (uc001tge.2/56899, intron 9 of 25)	12	100041528	100043892	2365	1	196472	uc001tgn.3	-34585	ENSG00000180219	FAM71C	family with sequence similarity 71 member C	uc001tge.2;uc001tgf.2;uc009ztt.1	56899;56899;56899	0;0;0	26729.8	typicalEnhancer	24252
chr14	81103589	81106518	2930	*	2	2471	26727.5	2_GES1-WT_peak_13137_lociStitched	Intron (uc010asz.3/145508, intron 8 of 14)	14	80943326	81302681	359356	2	145508	uc010asz.3	196163	ENSG00000100629	CEP128	centrosomal protein 128	uc010asz.3;uc031qpo.1;uc001xux.2	145508;145508;145508	0;0;0	26727.5	typicalEnhancer	24251
chr10	3847574	3854532	6959	*	2	4262	26715.6	2_GES1-WT_peak_4552_lociStitched	Distal Intergenic	10	3822519	3827473	4955	2	1316	uc001ihb.2	-20101	ENSG00000067082	KLF6	Kruppel like factor 6	NA	NA	NA	26715.6	typicalEnhancer	24250
chr10	92067595	92079328	11734	*	5	3675	26714.8	5_GES1-WT_peak_5989_lociStitched	Distal Intergenic	10	91589250	91600618	11369	1	643529	uc001kgw.2	478345	ENSG00000232229	LINC00865	long intergenic non-protein coding RNA 865	NA	NA	NA	26714.8	typicalEnhancer	24249
chr1	43671186	43673869	2684	*	2	2313	26702.3	2_GES1-WT_peak_1267_lociStitched	Exon (uc010ojz.2/149465, exon 11 of 13)	1	43629845	43638241	8397	2	10969	uc010ojx.2	-32945	ENSG00000117395	EBNA1BP2	EBNA1 binding protein 2	uc001cio.3;uc010ojz.2;uc001cip.2;uc001ciq.2;uc021omk.1	10969;149465;149465;149465;149465	0;0;0;0;0	26702.3	typicalEnhancer	24248
chr10	93348385	93377677	29293	*	7	7378	26691.8	7_GES1-WT_peak_6010_lociStitched	Promoter (<=1kb)	10	93066719	93371217	304499	2	100188947	uc010qnl.2	0	NA	HECTD2-AS1	HECTD2 antisense RNA 1	uc010qnl.2	100188947	0	26691.8	typicalEnhancer	24247
chr15	83952072	83957676	5605	*	3	4601	26651.2	3_GES1-WT_peak_14625_lociStitched	Promoter (<=1kb)	15	83924655	83953468	28814	2	646	uc002bjt.1	0	ENSG00000169594	BNC1	basonuclin 1	uc010uos.1;uc002bjt.1	646;646	-6;0	26651.2	typicalEnhancer	24246
chr1	36615517	36639229	23713	*	4	4092	26648.7	4_GES1-WT_peak_1085_lociStitched	Promoter (<=1kb)	1	36602170	36621654	19485	2	27095	uc031plx.1	0	ENSG00000054116	TRAPPC3	trafficking protein particle complex subunit 3	uc001bzx.4;uc031pls.1;uc031plt.1;uc031plu.1;uc031plv.1;uc031plw.1;uc031plx.1;uc001bzz.3;uc001caa.3;uc001cab.3;uc001cac.3;uc001cad.3	27095;27095;27095;27095;27095;27095;27095;55700;55700;55700;55700;55700	-402;-402;-402;-402;-402;-402;0;0;0;0;0;-3841	26648.7	typicalEnhancer	24245
chr2	217960211	217971535	11325	*	2	3120	26647.7	2_GES1-WT_peak_23824_lociStitched	Distal Intergenic	2	217724182	217724782	601	2	7141	uc002vgk.3	-235429	ENSG00000118245	TNP1	transition protein 1	NA	NA	NA	26647.7	typicalEnhancer	24244
chr1	235092645	235134110	41466	*	8	8754	26592.1	8_GES1-WT_peak_4249_lociStitched	Exon (uc001hwk.4/uc001hwk.4, exon 1 of 4)	1	235291118	235291252	135	2	677802	uc001hwm.1	157142	ENSG00000207181	SNORA14B	small nucleolar RNA, H/ACA box 14B	NA	NA	NA	26592.1	typicalEnhancer	24243
chr17	43448160	43463009	14850	*	2	2588	26566.7	2_GES1-WT_peak_17456_lociStitched	Distal Intergenic	17	43471268	43483449	12182	2	201176	uc010dak.3	20440	ENSG00000159314	ARHGAP27	Rho GTPase activating protein 27	NA	NA	NA	26566.7	typicalEnhancer	24242
chr20	43200848	43238702	37855	*	9	5713	26543.9	9_GES1-WT_peak_25047_lociStitched	5' UTR	20	43160436	43247678	87243	1	11142	uc002xmi.3	40412	ENSG00000168734	PKIG	cAMP-dependent protein kinase inhibitor gamma	uc002xmg.3;uc002xmh.3;uc002xmi.3	11142;11142;11142	0;0;0	26543.9	typicalEnhancer	24241
chr17	42263542	42298282	34741	*	5	6293	26542.1	5_GES1-WT_peak_17396_lociStitched	Promoter (<=1kb)	17	42253342	42264085	10744	2	339201	uc002ifn.4	0	ENSG00000267080	ASB16-AS1	ASB16 antisense RNA 1	uc002ifn.4;uc031rat.1;uc010wiv.2;uc002ifz.3;uc002iga.3;uc002igc.3;uc010czs.3;uc002igd.3;uc010czt.3;uc002ige.2;uc002ifo.3;uc002ifp.3;uc002ifr.3;uc010wiu.2;uc002ift.3;uc002ifx.3;uc002ify.3	339201;339201;56970;56970;56970;7343;7343;7343;7343;7343;79089;79089;79089;79089;79089;79089;79089	0;0;0;0;0;0;0;0;0;0;0;0;0;0;0;0;0	26542.1	typicalEnhancer	24240
chr5	151274772	151285965	11194	*	3	3854	26532	3_GES1-WT_peak_33688_lociStitched	Intron (uc003lur.3/2741, intron 1 of 8)	5	151202074	151304397	102324	2	2741	uc003lur.3	18432	ENSG00000145888	GLRA1	glycine receptor alpha 1	uc003lur.3;uc003lus.3;uc003lut.3	2741;2741;2741	0;0;0	26532	typicalEnhancer	24239
chr18	37525402	37541910	16509	*	4	4241	26501.9	4_GES1-WT_peak_18867_lociStitched	Distal Intergenic	18	36786888	37380282	593395	2	647946	uc002lal.1	-145120	ENSG00000267374	MIR924HG	MIR924 host gene	NA	NA	NA	26501.9	typicalEnhancer	24238
chr16	73080486	73128155	47670	*	8	6089	26480.7	8_GES1-WT_peak_16064_lociStitched	Promoter (<=1kb)	16	73126248	73127672	1425	1	283902	uc010vmq.2	0	ENSG00000260880	HCCAT5	hepatocellular carcinoma associated transcript 5	uc010vmq.2;uc002fck.3;uc002fcl.3	283902;463;463	0;0;0	26480.7	typicalEnhancer	24237
chr4	169525174	169555383	30210	*	5	5896	26476	5_GES1-WT_peak_31313_lociStitched	Promoter (<=1kb)	4	169552768	169849608	296841	1	23022	uc003irv.3	0	ENSG00000129116	PALLD	palladin, cytoskeletal associated protein	uc003iru.3;uc011cjx.2;uc003irv.3	23022;23022;23022	0;0;0	26476	typicalEnhancer	24236
chr7	47662270	47694181	31912	*	5	6133	26448.7	5_GES1-WT_peak_37648_lociStitched	Promoter (<=1kb)	7	47694842	47701246	6405	1	401335	uc010kyp.1	-661	ENSG00000221845	LINC02902	long intergenic non-protein coding RNA 2902	uc010kyp.1	401335	-661	26448.7	typicalEnhancer	24235
chr9	18478121	18492638	14518	*	3	4853	26444.5	3_GES1-WT_peak_41104_lociStitched	Intron (uc003znb.3/92949, intron 1 of 9)	9	18474079	18910947	436869	1	92949	uc003zne.4	4042	ENSG00000178031	ADAMTSL1	ADAMTS like 1	uc003znb.3;uc003znc.4;uc003zne.4	92949;92949;92949	0;0;0	26444.5	typicalEnhancer	24234
chr21	43050134	43105706	55573	*	7	7551	26441.6	7_GES1-WT_peak_25998_lociStitched	Promoter (<=1kb)	21	43099462	43117496	18035	1	54090	uc011aes.1	0	NA	LINC00111	long intergenic non-protein coding RNA 111	uc011aes.1	54090	0	26441.6	typicalEnhancer	24233
chr14	67431919	67442786	10868	*	3	3962	26438.6	3_GES1-WT_peak_12824_lociStitched	Exon (uc001xiw.3/10243, exon 9 of 11)	14	67289963	67648525	358563	1	10243	uc010tsu.2	141956	ENSG00000171723	GPHN	gephyrin	uc001xiw.3;uc001xix.3;uc001xiy.3;uc010tss.2;uc010tst.2;uc010tsu.2	10243;10243;10243;10243;10243;10243	0;0;0;0;0;0	26438.6	typicalEnhancer	24232
chr3	159561884	159601820	39937	*	6	8830	26394.4	6_GES1-WT_peak_29092_lociStitched	Exon (uc003fcq.2/100505385, exon 6 of 11)	3	159557650	159615155	57506	1	29970	uc003fcu.2	4234	ENSG00000151967	SCHIP1	schwannomin interacting protein 1	uc003fcq.2;uc003fcr.2;uc010hvz.1;uc003fcs.2;uc003fct.2;uc021xgm.1;uc003fcu.2	100505385;100505385;100505385;29970;29970;29970;29970	0;0;0;0;0;0;0	26394.4	typicalEnhancer	24231
chr9	112532214	112562294	30081	*	4	6183	26384	4_GES1-WT_peak_42182_lociStitched	Promoter (<=1kb)	9	112542577	112713756	171180	1	114299	uc004beh.4	0	NA	NA	NA	uc004beg.3;uc004beh.4;uc004bei.2;uc004bej.4;uc004bek.4	114299;114299;445815;445815;445815	0;0;0;0;0	26384	typicalEnhancer	24230
chr4	143316956	143330065	13110	*	4	3920	26368.1	4_GES1-WT_peak_30978_lociStitched	Exon (uc011chm.2/8821, exon 3 of 24)	4	142949182	143352538	403357	2	8821	uc011chm.2	22473	ENSG00000109452	INPP4B	inositol polyphosphate-4-phosphatase type II B	uc011chm.2;uc003iiw.4;uc003iix.4;uc011cho.1	8821;8821;8821;8821	0;0;0;0	26368.1	typicalEnhancer	24229
chr12	1582294	1585925	3632	*	2	3189	26339.6	2_GES1-WT_peak_8870_lociStitched	Intron (uc001qiz.2/23085, intron 19 of 19)	12	1609657	1613590	3934	1	100292680	uc021qsv.1	-23732	ENSG00000249628	LINC00942	long intergenic non-protein coding RNA 942	uc001qiz.2;uc001qja.2;uc001qjb.2;uc001qjc.2;uc001qjd.2;uc001qjf.2;uc001qje.2	23085;23085;23085;23085;23085;23085;23085	0;0;0;0;0;0;0	26339.6	typicalEnhancer	24228
chr7	130848388	130859243	10856	*	2	3941	26284.5	2_GES1-WT_peak_38751_lociStitched	Intron (uc011kpl.2/4289, intron 2 of 18)	7	130794855	131181398	386544	1	4289	uc011kpl.2	53533	ENSG00000128585	MKLN1	muskelin 1	uc011kpl.2	4289	0	26284.5	typicalEnhancer	24227
chr6	40904856	40927127	22272	*	3	4933	26269.8	3_GES1-WT_peak_35084_lociStitched	Distal Intergenic	6	40994640	41006938	12299	2	222643	uc003opi.3	79811	ENSG00000124602	UNC5CL	unc-5 family C-terminal like	NA	NA	NA	26269.8	typicalEnhancer	24226
chr11	35639573	35652704	13132	*	3	4278	26256.1	3_GES1-WT_peak_7299_lociStitched	Promoter (<=1kb)	11	35639735	35642421	2687	1	24147	uc001mwh.3	0	ENSG00000179431	FJX1	four-jointed box kinase 1	uc001mwh.3	24147	0	26256.1	typicalEnhancer	24225
chr5	167361309	167373967	12659	*	2	4020	26248.4	2_GES1-WT_peak_33887_lociStitched	Intron (uc021yhi.1/57451, intron 2 of 3)	5	167545297	167691162	145866	1	57451	uc003lzt.4	-171330	ENSG00000145934	TENM2	teneurin transmembrane protein 2	uc021yhi.1;uc010jjd.3;uc003lzq.3;uc003lzr.5	57451;57451;57451;57451	0;0;0;0	26248.4	typicalEnhancer	24224
chr1	39852622	39875286	22665	*	7	4906	26196.2	7_GES1-WT_peak_1156_lociStitched	Promoter (<=1kb)	1	39875176	39882154	6979	1	643314	uc009vvt.1	0	NA	KIAA0754	KIAA0754	uc001cdc.2;uc021olt.1;uc031pmc.1;uc001cda.1;uc031pmd.1;uc009vvt.1	23499;23499;23499;23499;23499;643314	0;0;0;0;0;0	26196.2	typicalEnhancer	24223
chr8	22436889	22462930	26042	*	8	4931	26195.6	8_GES1-WT_peak_39397_lociStitched	Promoter (<=1kb)	8	22457114	22461662	4549	1	541565	uc003xce.3	0	ENSG00000241852	C8orf58	chromosome 8 open reading frame 58	uc003xbv.3;uc003xbw.4;uc003xce.3;uc003xcf.3;uc011kzl.2;uc003xch.3;uc003xci.3;uc003xcj.1;uc003xbx.2;uc003xby.4;uc003xca.3;uc003xcc.2	10174;10174;541565;541565;541565;57805;57805;57805;64236;64236;64236;64236	0;0;0;0;0;0;0;-1190;0;0;0;0	26195.6	typicalEnhancer	24222
chr15	63187592	63190006	2415	*	2	2008	26182.9	2_GES1-WT_peak_14081_lociStitched	Distal Intergenic	15	63116156	63116240	85	1	406965	uc010uid.1	71436	ENSG00000211137	MIR190A	microRNA 190a	NA	NA	NA	26182.9	typicalEnhancer	24221
chr6	18306055	18309480	3426	*	2	3016	26182.5	2_GES1-WT_peak_34591_lociStitched	Distal Intergenic	6	18225256	18264799	39544	2	7913	uc011djg.1	-41256	ENSG00000124795	DEK	DEK proto-oncogene	NA	NA	NA	26182.5	typicalEnhancer	24220
chr11	9921499	9929475	7977	*	3	3427	26160.6	3_GES1-WT_peak_6905_lociStitched	Intron (uc001mig.3/uc001mig.3, intron 1 of 2)	11	9978126	9990092	11967	2	81846	uc001mih.4	60617	ENSG00000133812	SBF2	SET binding factor 2	uc001mib.2;uc001mif.3	81846;81846	0;0	26160.6	typicalEnhancer	24219
chr8	119445023	119453758	8736	*	4	3427	26146.8	4_GES1-WT_peak_40474_lociStitched	Exon (uc010mda.1/401474, exon 3 of 5)	8	119633240	119738306	105067	1	552860	uc022bae.1	-179482	NA	SAMD12-AS1	SAMD12 antisense RNA 1	uc010mda.1;uc010mdb.1;uc003yom.2	401474;401474;401474	0;0;0	26146.8	typicalEnhancer	24218
chr8	77317425	77320751	3327	*	2	2866	26141.2	2_GES1-WT_peak_40036_lociStitched	Distal Intergenic	8	77593515	77620493	26979	1	79776	uc003yat.1	-272764	ENSG00000091656	ZFHX4	zinc finger homeobox 4	NA	NA	NA	26141.2	typicalEnhancer	24217
chr15	93443528	93474095	30568	*	7	3851	26132.6	7_GES1-WT_peak_14819_lociStitched	Promoter (<=1kb)	15	93447629	93447705	77	1	100422995	uc021svr.1	0	ENSG00000284324	MIR3175	microRNA 3175	uc021svr.1;uc021svn.1;uc021svo.1;uc021svp.1;uc002bsm.2;uc002bsn.3;uc002bso.1;uc002bsp.3;uc010urb.2	100422995;100507217;100507217;100507217;1106;1106;1106;1106;1106	0;0;0;0;0;0;0;0;0	26132.6	typicalEnhancer	24216
chr6	34191441	34216755	25315	*	5	5709	26125.1	5_GES1-WT_peak_34959_lociStitched	Promoter (<=1kb)	6	34204577	34214008	9432	1	3159	uc003oit.3	0	ENSG00000137309	HMGA1	high mobility group AT-hook 1	uc003ojf.3;uc003ojg.3;uc003ojh.3;uc003oji.4;uc003oit.3;uc003oiu.3;uc003oiv.3;uc003oiw.3;uc011dso.2;uc003oix.3;uc003oiy.3;uc003oiz.3;uc003oja.3;uc003ojc.3;uc011dsp.2;uc003ojd.3	221491;221491;221491;221491;3159;3159;3159;3159;3159;3159;3159;3159;3159;3159;3159;3159	0;0;0;0;0;0;0;0;0;0;0;0;0;0;0;0	26125.1	typicalEnhancer	24215
chr10	63594803	63603563	8761	*	3	4386	26095.5	3_GES1-WT_peak_5475_lociStitched	Distal Intergenic	10	63661013	63810997	149985	1	84159	uc010qil.2	-57450	ENSG00000150347	ARID5B	AT-rich interaction domain 5B	NA	NA	NA	26095.5	typicalEnhancer	24214
chr21	23085193	23088894	3702	*	2	3379	26083.9	2_GES1-WT_peak_25615_lociStitched	Distal Intergenic	21	23095613	23109639	14027	2	378828	uc021wht.1	20745	ENSG00000238265	LINC00317	long intergenic non-protein coding RNA 317	NA	NA	NA	26083.9	typicalEnhancer	24213
chr8	128305808	128308012	2205	*	1	2206	26040.6	1_GES1-WT_peak_40633_lociStitched	Intron (uc003ysc.2/uc003ysc.2, intron 2 of 2)	8	128427857	128429441	1585	1	5462	uc003ysf.3	-119845	ENSG00000212993	POU5F1B	POU class 5 homeobox 1B	uc003yse.2	727677	0	26040.6	typicalEnhancer	24212
chr3	8929193	8934511	5319	*	4	3078	26034.9	4_GES1-WT_peak_27026_lociStitched	Exon (uc003brd.3/56852, exon 12 of 13)	3	8918880	9005159	86280	2	56852	uc003brd.3	70648	ENSG00000070950	RAD18	RAD18 E3 ubiquitin protein ligase	uc003brd.3	56852	0	26034.9	typicalEnhancer	24211
chr5	63634519	63637615	3097	*	2	2730	26034	2_GES1-WT_peak_32376_lociStitched	Intron (uc003jti.3/285671, intron 7 of 7)	5	63801774	63908121	106348	1	401190	uc003jtj.4	-164159	ENSG00000186479	RGS7BP	regulator of G protein signaling 7 binding protein	uc003jti.3	285671	0	26034	typicalEnhancer	24210
chr12	46886041	46889320	3280	*	1	3281	26022.2	1_GES1-WT_peak_9464_lociStitched	Distal Intergenic	12	46751971	46766645	14675	2	54407	uc001rph.3	-119396	ENSG00000134294	SLC38A2	solute carrier family 38 member 2	NA	NA	NA	26022.2	typicalEnhancer	24209
chr4	20194974	20206412	11439	*	3	4833	26015.7	3_GES1-WT_peak_29920_lociStitched	Distal Intergenic	4	20255235	20620788	365554	1	9353	uc003gpr.1	-48823	ENSG00000145147	SLIT2	slit guidance ligand 2	NA	NA	NA	26015.7	typicalEnhancer	24208
chr2	161112335	161137077	24743	*	3	5848	26002.4	3_GES1-WT_peak_23032_lociStitched	Promoter (<=1kb)	2	160998493	161128399	129907	2	3694	uc010fow.1	0	ENSG00000115221	ITGB6	integrin subunit beta 6	uc010fow.1;uc002ubi.4;uc002ubm.3;uc002ubn.3;uc002ubo.3;uc002ubp.3;uc010fox.2	3694;5937;5937;5937;5937;5937;5937	0;0;0;0;0;0;0	26002.4	typicalEnhancer	24207
chr9	131314032	131321824	7793	*	4	3145	25992.8	4_GES1-WT_peak_42684_lociStitched	Promoter (<=1kb)	9	131314837	131315615	779	1	6709	uc004bvk.3	0	ENSG00000197694	SPTAN1	spectrin alpha, non-erythrocytic 1	uc004bvk.3;uc011mbg.2;uc011mbh.2;uc004bvl.4;uc004bvm.4;uc004bvn.4	6709;6709;6709;6709;6709;6709	0;0;0;0;0;0	25992.8	typicalEnhancer	24206
chr10	54245814	54248744	2931	*	1	2932	25916.2	1_GES1-WT_peak_5372_lociStitched	Distal Intergenic	10	54074041	54077417	3377	1	22943	uc001jjr.3	171773	ENSG00000107984	DKK1	dickkopf WNT signaling pathway inhibitor 1	NA	NA	NA	25916.2	typicalEnhancer	24205
chr11	79794098	79815545	21448	*	3	4987	25889.9	3_GES1-WT_peak_8028_lociStitched	Distal Intergenic	11	78364328	79151695	787368	2	26011	uc001ozl.4	-642403	ENSG00000149256	TENM4	teneurin transmembrane protein 4	NA	NA	NA	25889.9	typicalEnhancer	24204
chr3	98827096	98851380	24285	*	7	5064	25863.5	7_GES1-WT_peak_28062_lociStitched	Distal Intergenic	3	98568232	98620533	52302	2	131566	uc003dtf.1	-206563	ENSG00000057019	DCBLD2	discoidin, CUB and LCCL domain containing 2	NA	NA	NA	25863.5	typicalEnhancer	24203
chr6	72095543	72115483	19941	*	4	4982	25861.5	4_GES1-WT_peak_35481_lociStitched	Promoter (<=1kb)	6	72113254	72113324	71	2	407029	uc003pfy.1	0	ENSG00000207827	MIR30A	microRNA 30a	uc003pfy.1	407029	0	25861.5	typicalEnhancer	24202
chr14	96712268	96736167	23900	*	4	6755	25850.2	4_GES1-WT_peak_13316_lociStitched	Promoter (<=1kb)	14	96722547	96731100	8554	1	623	uc001yfh.3	0	ENSG00000100739	BDKRB1	bradykinin receptor B1	uc001yfh.3;uc010avl.2;uc001yfg.2;uc010avm.1;uc010twu.1	623;624;624;624;624	0;0;0;0;0	25850.2	typicalEnhancer	24201
chr4	151150250	151159920	9671	*	2	4379	25848.6	2_GES1-WT_peak_31072_lociStitched	Exon (uc003ilm.4/166614, exon 9 of 16)	4	151185811	151232521	46711	2	987	uc003ilr.4	72601	ENSG00000198589	LRBA	LPS responsive beige-like anchor protein	uc003ilm.4;uc003ilo.4;uc003ilp.4	166614;166614;166614	0;0;0	25848.6	typicalEnhancer	24200
chr15	56189125	56206811	17687	*	4	4303	25847.8	4_GES1-WT_peak_13964_lociStitched	Intron (uc002adi.3/4734, intron 1 of 21)	15	56119122	56209329	90208	2	4734	uc002adi.3	2518	ENSG00000069869	NEDD4	NEDD4 E3 ubiquitin protein ligase	uc002adi.3;uc002adj.3;uc002adk.3;uc010bfm.3;uc010ugj.2;uc002adl.3	4734;4734;4734;4734;4734;4734	0;0;0;0;0;0	25847.8	typicalEnhancer	24199
chr10	112158047	112171691	13645	*	3	4338	25801.3	3_GES1-WT_peak_6341_lociStitched	Distal Intergenic	10	112257625	112271302	13678	1	1847	uc001kzd.3	-85934	ENSG00000138166	DUSP5	dual specificity phosphatase 5	NA	NA	NA	25801.3	typicalEnhancer	24198
chr1	218518712	218524963	6252	*	2	2751	25774.5	2_GES1-WT_peak_3932_lociStitched	Promoter (<=1kb)	1	218517538	218519020	1483	2	728463	uc031psd.1	0	ENSG00000232480	TGFB2-AS1	TGFB2 antisense RNA 1 (head to head)	uc001hll.3;uc001hlm.3;uc001hln.3;uc001hlo.3;uc010pue.2;uc031psd.1	7042;7042;7042;7042;7042;728463	0;0;0;0;0;0	25774.5	typicalEnhancer	24197
chr8	122156874	122177386	20513	*	6	5735	25727.4	6_GES1-WT_peak_40514_lociStitched	Distal Intergenic	8	121582500	121824309	241810	2	6641	uc003ype.3	-332565	ENSG00000172164	SNTB1	syntrophin beta 1	NA	NA	NA	25727.4	typicalEnhancer	24196
chr3	151022623	151038076	15454	*	5	5946	25721.6	5_GES1-WT_peak_28946_lociStitched	Promoter (<=1kb)	3	151011876	151034636	22761	2	53836	uc003eyt.2	0	ENSG00000138271	GPR87	G protein-coupled receptor 87	uc003eyp.3;uc011bnz.2;uc003eyt.2	116931;116931;53836	0;0;0	25721.6	typicalEnhancer	24195
chr20	25280830	25296951	16122	*	4	4000	25708.1	4_GES1-WT_peak_24746_lociStitched	3' UTR	20	25228706	25278648	49943	1	5834	uc002wup.3	52124	ENSG00000100994	PYGB	glycogen phosphorylase B	uc002wuq.3;uc002wus.2;uc002wup.3	26090;26090;5834	0;0;0	25708.1	typicalEnhancer	24194
chr11	9586389	9596645	10257	*	4	3685	25687.6	4_GES1-WT_peak_6889_lociStitched	Promoter (<=1kb)	11	9595228	9611313	16086	1	7465	uc001mhs.3	0	ENSG00000166483	WEE1	WEE1 G2 checkpoint kinase	uc001mhs.3;uc001mht.3;uc001mhu.3	7465;7465;7465	0;0;-443	25687.6	typicalEnhancer	24193
chr1	183240371	183261700	21330	*	3	4746	25653.6	3_GES1-WT_peak_3312_lociStitched	Promoter (<=1kb)	1	183217372	183248417	31046	2	23057	uc009wye.2	0	ENSG00000157064	NMNAT2	nicotinamide nucleotide adenylyltransferase 2	uc009wye.2;uc001gqb.2;uc001gqc.2;uc001gqd.3	23057;23057;23057;23057	0;0;0;0	25653.6	typicalEnhancer	24192
chr11	73018932	73046531	27600	*	6	6221	25634.9	6_GES1-WT_peak_7915_lociStitched	Promoter (<=1kb)	11	73019663	73080425	60763	1	9828	uc001otu.3	0	ENSG00000110237	ARHGEF17	Rho guanine nucleotide exchange factor 17	uc001otu.3	9828	0	25634.9	typicalEnhancer	24191
chr10	74056675	74095435	38761	*	7	5457	25566.8	7_GES1-WT_peak_5665_lociStitched	3' UTR	10	74092588	74114907	22320	2	54788	uc001jsz.2	19472	ENSG00000148719	DNAJB12	DnaJ heat shock protein family (Hsp40) member B12	uc001jsz.2;uc001jta.2;uc010qjv.1	54788;54788;54788	0;0;0	25566.8	typicalEnhancer	24190
chr6	12483216	12492625	9410	*	2	4258	25565.1	2_GES1-WT_peak_34463_lociStitched	Distal Intergenic	6	12290529	12297427	6899	1	1906	uc003naf.4	192687	ENSG00000078401	EDN1	endothelin 1	NA	NA	NA	25565.1	typicalEnhancer	24189
chr4	183152032	183164792	12761	*	5	3532	25560.3	5_GES1-WT_peak_31450_lociStitched	Intron (uc010irv.1/55714, intron 1 of 3)	4	183090446	183090531	86	1	100302270	uc021xuw.1	61586	ENSG00000221227	MIR1305	microRNA 1305	uc010irv.1	55714	0	25560.3	typicalEnhancer	24188
chrX	133802912	133811356	8445	*	2	4104	25552.9	2_GES1-WT_peak_44080_lociStitched	Distal Intergenic	23	133699873	133792513	92641	2	10761	uc004exp.1	-10399	ENSG00000170965	PLAC1	placenta enriched 1	NA	NA	NA	25552.9	typicalEnhancer	24187
chr6	159270409	159291541	21133	*	5	5229	25488.5	5_GES1-WT_peak_36626_lociStitched	Promoter (<=1kb)	6	159262158	159278664	16507	2	202459	uc003qrw.4	0	ENSG00000243775	OSTCP1	oligosaccharyltransferase complex subunit pseudogene 1	uc003qrw.4	202459	0	25488.5	typicalEnhancer	24186
chr1	156470805	156475434	4630	*	2	3520	25435.4	2_GES1-WT_peak_2911_lociStitched	Promoter (<=1kb)	1	156433520	156470634	37115	2	4209	uc001fpe.2	-171	ENSG00000116604	MEF2D	myocyte enhancer factor 2D	uc001fpc.4;uc001fpd.4;uc009wsa.4;uc001fpe.2	4209;4209;4209;4209	0;0;0;0	25435.4	typicalEnhancer	24185
chr7	116764222	116778877	14656	*	4	3739	25420.8	4_GES1-WT_peak_38592_lociStitched	5' UTR	7	116759615	116838594	78980	1	7982	uc003vix.1	4607	ENSG00000004866	ST7	suppression of tumorigenicity 7	uc003vin.3;uc011knl.2;uc003vio.3;uc003viq.3;uc003vir.3;uc011knm.2;uc003vix.1;uc003viu.3;uc003viw.3	7982;7982;7982;7982;7982;7982;7982;93654;93654	0;0;0;0;0;0;0;0;0	25420.8	typicalEnhancer	24184
chr5	145939083	145941946	2864	*	1	2865	25393.4	1_GES1-WT_peak_33552_lociStitched	Distal Intergenic	5	145894417	145895676	1260	2	134391	uc003lod.1	-43407	ENSG00000173250	GPR151	G protein-coupled receptor 151	NA	NA	NA	25393.4	typicalEnhancer	24183
chr4	146654440	146657729	3290	*	2	2985	25335.3	2_GES1-WT_peak_31006_lociStitched	Distal Intergenic	4	146601356	146653948	52593	1	646603	uc003ikk.3	53084	ENSG00000237136	C4orf51	chromosome 4 open reading frame 51	uc003ikk.3	646603	53084	25335.3	typicalEnhancer	24182
chr16	66415487	66418129	2643	*	1	2644	25331.3	1_GES1-WT_peak_15866_lociStitched	Intron (uc002eom.4/1003, intron 2 of 11)	16	66413207	66426888	13682	1	1003	uc002eon.1	2280	ENSG00000179776	CDH5	cadherin 5	uc002eom.4;uc002eon.1	1003;1003	0;0	25331.3	typicalEnhancer	24181
chr7	18547772	18561027	13256	*	4	3921	25330.9	4_GES1-WT_peak_37049_lociStitched	Promoter (<=1kb)	7	18548900	18708466	159567	1	9734	uc011jye.2	0	ENSG00000048052	HDAC9	histone deacetylase 9	uc011jya.2;uc003sua.1;uc003sub.4;uc003sud.2;uc011jyb.2;uc011jyc.2;uc003sue.3;uc003suf.2;uc010kud.2;uc011jyd.2;uc003suh.3;uc003sui.3;uc003suj.3;uc011jye.2;uc011jyf.2	9734;9734;9734;9734;9734;9734;9734;9734;9734;9734;9734;9734;9734;9734;9734	0;0;0;0;0;0;0;0;0;0;0;0;0;0;0	25330.9	typicalEnhancer	24180
chr10	60026928	60041869	14942	*	3	4611	25298.3	3_GES1-WT_peak_5400_lociStitched	Promoter (<=1kb)	10	59951278	60027694	76417	2	253430	uc001jkb.3	0	ENSG00000151151	IPMK	inositol polyphosphate multikinase	uc001jkb.3;uc001jkc.5;uc001jkd.4	253430;55847;55847	0;0;-836	25298.3	typicalEnhancer	24179
chr6	11765871	11772708	6838	*	3	3780	25279.4	3_GES1-WT_peak_34436_lociStitched	Exon (uc003nab.3/84830, exon 2 of 6)	6	11713888	11779280	65393	2	84830	uc003nab.3	6572	ENSG00000111863	ADTRP	androgen dependent TFPI regulating protein	uc003nab.3;uc011dip.2	84830;84830	0;0	25279.4	typicalEnhancer	24178
chr17	60855591	60869564	13974	*	3	4629	25234.2	3_GES1-WT_peak_17802_lociStitched	Exon (uc010ddr.3/162333, exon 3 of 11)	17	60778675	60884011	105337	2	162333	uc010ddr.3	14447	ENSG00000173838	MARCHF10	membrane associated ring-CH-type finger 10	uc010ddr.3;uc002jag.4;uc010dds.3;uc002jah.2	162333;162333;162333;162333	0;0;0;0	25234.2	typicalEnhancer	24177
chr1	3447113	3465409	18297	*	3	3883	25165.7	3_GES1-WT_peak_244_lociStitched	Promoter (<=1kb)	1	3404506	3448012	43507	2	1953	uc001akk.3	0	ENSG00000162591	MEGF6	multiple EGF like domains 6	uc001akk.3;uc001akl.3	1953;1953	0;0	25165.7	typicalEnhancer	24176
chr11	93861392	93870349	8958	*	2	3795	25128.1	2_GES1-WT_peak_8198_lociStitched	Promoter (<=1kb)	11	93862094	93915132	53039	1	24145	uc001peq.3	0	ENSG00000110218	PANX1	pannexin 1	uc001peq.3;uc001per.3	24145;24145	0;0	25128.1	typicalEnhancer	24175
chr6	147234310	147237393	3084	*	1	3085	25126.9	1_GES1-WT_peak_36403_lociStitched	Promoter (<=1kb)	6	147162525	147237021	74497	2	729178	uc003qls.2	0	ENSG00000233452	STXBP5-AS1	STXBP5 antisense RNA 1	uc003qls.2;uc003qlt.2;uc003qlu.1;uc003qlv.3	729178;729178;729178;729178	0;0;0;0	25126.9	typicalEnhancer	24174
chr6	52364301	52383536	19236	*	4	4327	25126.1	4_GES1-WT_peak_35313_lociStitched	Promoter (<=1kb)	6	52370340	52370934	595	2	9697	uc003par.1	0	ENSG00000065308	TRAM2	translocation associated membrane protein 2	uc003pap.4;uc011dwv.1;uc011dww.2;uc003paq.3;uc003par.1	114327;114327;114327;9697;9697	0;0;0;0;0	25126.1	typicalEnhancer	24173
chr21	46729078	46762177	33100	*	4	6007	25099.7	4_GES1-WT_peak_26106_lociStitched	Distal Intergenic	21	46707981	46717269	9289	1	642852	uc031rvz.1	21097	ENSG00000223768	LINC00205	long intergenic non-protein coding RNA 205	NA	NA	NA	25099.7	typicalEnhancer	24172
chr2	228717282	228736612	19331	*	3	5398	25060.7	3_GES1-WT_peak_24083_lociStitched	Promoter (<=1kb)	2	228736327	228789026	52700	1	164781	uc002vpn.1	0	ENSG00000123977	DAW1	dynein assembly factor with WD repeats 1	uc002vpn.1;uc002vpo.1;uc010zlw.1	164781;164781;164781	0;0;0	25060.7	typicalEnhancer	24171
chr10	28360867	28384847	23981	*	6	5469	25057.7	6_GES1-WT_peak_4973_lociStitched	Exon (uc009xkz.1/143098, exon 11 of 16)	10	28101097	28287977	186881	2	55130	uc001itz.3	-72890	ENSG00000169126	ODAD2	outer dynein arm docking complex subunit 2	uc009xkz.1;uc001iua.1;uc001iub.1;uc009xla.2;uc010qdv.1	143098;143098;143098;143098;143098	0;0;0;0;0	25057.7	typicalEnhancer	24170
chr6	57169389	57182145	12757	*	3	4834	25025.4	3_GES1-WT_peak_35449_lociStitched	Promoter (<=1kb)	6	57182422	57191161	8740	1	5558	uc003pdv.1	-277	ENSG00000146143	PRIM2	DNA primase subunit 2	uc003pdv.1;uc003pdw.3;uc003pdx.3	5558;5558;5558	-277;-277;-277	25025.4	typicalEnhancer	24169
chr6	124990178	125006558	16381	*	3	3679	25025.3	3_GES1-WT_peak_36033_lociStitched	Intron (uc003pzo.3/154215, intron 4 of 6)	6	125283862	125404661	120800	1	154214	uc003pzr.3	-277304	ENSG00000146373	RNF217	ring finger protein 217	uc003pzo.3;uc003pzp.3;uc010keq.3;uc010ker.3	154215;154215;154215;154215	0;0;0;0	25025.3	typicalEnhancer	24168
chr3	193839487	193860417	20931	*	3	3855	25008.4	3_GES1-WT_peak_29550_lociStitched	Promoter (<=1kb)	3	193853931	193855073	1143	1	3280	uc011bst.2	0	ENSG00000114315	HES1	hes family bHLH transcription factor 1	uc011bst.2;uc003ftq.2	3280;3280	0;0	25008.4	typicalEnhancer	24167
chr3	161120283	161147469	27187	*	7	4075	25006.6	7_GES1-WT_peak_29120_lociStitched	Promoter (<=1kb)	3	161144215	161166030	21816	1	101243545	uc031sce.1	0	ENSG00000240567	LINC02067	long intergenic non-protein coding RNA 2067	uc031sce.1	101243545	0	25006.6	typicalEnhancer	24166
chr5	139069474	139090929	21456	*	5	5017	24985.5	5_GES1-WT_peak_33397_lociStitched	Distal Intergenic	5	139028518	139062680	34163	1	51523	uc003let.2	40956	ENSG00000171604	CXXC5	CXXC finger protein 5	NA	NA	NA	24985.5	typicalEnhancer	24165
chr2	192490974	192502551	11578	*	2	3604	24979.5	2_GES1-WT_peak_23494_lociStitched	Distal Intergenic	2	192542798	192553248	10451	1	64859	uc002usw.3	-40247	ENSG00000173559	NABP1	nucleic acid binding protein 1	NA	NA	NA	24979.5	typicalEnhancer	24164
chr13	45779172	45794974	15803	*	3	4702	24957.7	3_GES1-WT_peak_11467_lociStitched	Exon (uc001uzw.3/2963, exon 5 of 8)	13	45766988	45775175	8188	2	386618	uc001uzx.4	-3997	ENSG00000180332	KCTD4	potassium channel tetramerization domain containing 4	uc001uzw.3;uc001uzx.4	2963;386618	0;-3997	24957.7	typicalEnhancer	24163
chr7	5567103	5571099	3997	*	3	2881	24866.9	3_GES1-WT_peak_36860_lociStitched	Promoter (<=1kb)	7	5566779	5569294	2516	2	60	uc003sor.4	0	ENSG00000075624	ACTB	actin beta	uc003sor.4;uc003soq.4;uc003sot.4	60;60;60	0;0;0	24866.9	typicalEnhancer	24162
chr9	117908190	117933570	25381	*	4	5299	24858.2	4_GES1-WT_peak_42365_lociStitched	Intron (uc004bjk.1/50514, intron 1 of 7)	9	117904097	118164923	260827	1	50514	uc004bjk.1	4093	ENSG00000173077	DELEC1	deleted in esophageal cancer 1	uc004bjk.1	50514	0	24858.2	typicalEnhancer	24161
chr16	80333111	80335692	2582	*	1	2583	24848.4	1_GES1-WT_peak_16151_lociStitched	Distal Intergenic	16	80574854	80584541	9688	1	83657	uc002ffo.3	-239162	ENSG00000168589	DYNLRB2	dynein light chain roadblock-type 2	NA	NA	NA	24848.4	typicalEnhancer	24160
chr2	234321893	234339420	17528	*	5	4364	24842.4	5_GES1-WT_peak_24164_lociStitched	Promoter (<=1kb)	2	234327887	234366463	38577	1	8527	uc010fyh.1	0	ENSG00000077044	DGKD	diacylglycerol kinase delta	uc002vui.1;uc002vuj.1;uc010fyh.1;uc002vuk.1	8527;8527;8527;8527	0;0;0;-3606	24842.4	typicalEnhancer	24159
chr11	36167528	36188028	20501	*	8	4382	24804.2	8_GES1-WT_peak_7314_lociStitched	Intron (uc001mwk.1/143458, intron 4 of 5)	11	36119877	36252841	132965	1	143458	uc010rfa.1	47651	ENSG00000179241	LDLRAD3	low density lipoprotein receptor class A domain containing 3	uc001mwk.1;uc010rey.1;uc010rez.1;uc010rfa.1	143458;143458;143458;143458	0;0;0;0	24804.2	typicalEnhancer	24158
chr12	56905217	56921487	16271	*	4	2735	24777.5	4_GES1-WT_peak_9781_lociStitched	Promoter (<=1kb)	12	56915609	56989980	74372	1	5939	uc001sln.2	0	ENSG00000076067	RBMS2	RNA binding motif single stranded interacting protein 2	uc001sln.2;uc009zou.2;uc010sqp.1;uc010sqq.1	5939;5939;5939;5939	0;0;0;0	24777.5	typicalEnhancer	24157
chr21	35897968	35926536	28569	*	5	6145	24769.3	5_GES1-WT_peak_25828_lociStitched	Promoter (<=1kb)	21	35888784	35899261	10478	2	1827	uc002yub.3	0	ENSG00000159200	RCAN1	regulator of calcineurin 1	uc002yub.3;uc002yuc.3;uc002yud.3;uc002yue.3;uc011adx.1	1827;1827;1827;1827;1827	0;0;0;0;0	24769.3	typicalEnhancer	24156
chr2	110858190	110873414	15225	*	6	3717	24763.5	6_GES1-WT_peak_22461_lociStitched	Promoter (<=1kb)	2	110841447	110874143	32697	2	7851	uc002tfk.3	729	ENSG00000144063	MALL	mal, T cell differentiation protein like	uc002tfk.3;uc010fju.3	7851;7851	0;0	24763.5	typicalEnhancer	24155
chr6	158423955	158463976	40022	*	9	9005	24757.6	9_GES1-WT_peak_36592_lociStitched	Promoter (<=1kb)	6	158438080	158520207	82128	1	8871	uc003qqy.2	0	ENSG00000078269	SYNJ2	synaptojanin 2	uc031sqq.1;uc011efm.2;uc003qqw.2;uc003qqx.2;uc003qqy.2;uc010kjo.1;uc011efn.1	100874300;8871;8871;8871;8871;8871;8871	1816;0;0;0;0;0;0	24757.6	typicalEnhancer	24154
chr13	97946897	97961979	15083	*	3	4961	24749.7	3_GES1-WT_peak_11828_lociStitched	Intron (uc031qmz.1/10150, intron 3 of 7)	13	97927886	98046374	118489	1	10150	uc010tij.2	19011	ENSG00000139793	MBNL2	muscleblind like splicing regulator 2	uc031qmz.1;uc001vmz.4;uc001vna.4;uc001vnb.4;uc010aft.4;uc010tij.2	10150;10150;10150;10150;10150;10150	0;0;0;0;0;0	24749.7	typicalEnhancer	24153
chr2	68270815	68274884	4070	*	4	2850	24743.6	4_GES1-WT_peak_21947_lociStitched	5' UTR	2	68269332	68280269	10938	2	10438	uc002sea.4	5385	ENSG00000197223	C1D	C1D nuclear receptor corepressor	uc002sea.4;uc002seb.3;uc002sec.3;uc010fdc.3;uc021viu.1	10438;10438;10438;10438;10438	0;0;0;0;0	24743.6	typicalEnhancer	24152
chr6	114316482	114322020	5539	*	5	3044	24743.3	5_GES1-WT_peak_35946_lociStitched	Exon (uc003pwf.3/uc003pwf.3, exon 4 of 10)	6	114257320	114292359	35040	2	3066	uc003pwe.2	-24123	ENSG00000196591	HDAC2	histone deacetylase 2	NA	NA	NA	24743.3	typicalEnhancer	24151
chr9	35727232	35732188	4957	*	2	3011	24720.1	2_GES1-WT_peak_41308_lociStitched	Promoter (<=1kb)	9	35732317	35737005	4689	1	10488	uc003zxv.3	-129	ENSG00000107175	CREB3	cAMP responsive element binding protein 3	uc003zxv.3;uc010mla.3;uc003zxw.3;uc011lpd.2;uc003zxx.1;uc011lpb.1;uc011lpc.1;uc003zxt.2;uc003zxu.4	10488;10488;57704;57704;57704;57704;57704;7094;7094	-129;-356;0;0;6441;0;0;0;0	24720.1	typicalEnhancer	24150
chr10	128064792	128087329	22538	*	5	5852	24697.1	5_GES1-WT_peak_6662_lociStitched	Promoter (<=1kb)	10	127702902	128077127	374226	2	8038	uc001ljk.2	0	ENSG00000148848	ADAM12	ADAM metallopeptidase domain 12	uc001ljk.2;uc010qul.1;uc001ljl.4;uc001ljm.3;uc001ljn.3	8038;8038;8038;8038;8038	0;0;0;0;0	24697.1	typicalEnhancer	24149
chr12	104513967	104531895	17929	*	4	3962	24686.4	4_GES1-WT_peak_10483_lociStitched	Promoter (<=1kb)	12	104510858	104532040	21183	2	4801	uc001tkl.1	145	ENSG00000120837	NFYB	nuclear transcription factor Y subunit beta	uc001tkl.1;uc009zum.1	4801;4801	0;0	24686.4	typicalEnhancer	24148
chr1	201664804	201684790	19987	*	3	4701	24652	3_GES1-WT_peak_3532_lociStitched	Exon (uc001gwu.3/89796, exon 2 of 29)	1	201688636	201688755	120	1	100847050	uc031prn.1	-3846	ENSG00000264802	MIR5191	microRNA 5191	uc031prn.1;uc001gwu.3;uc021phi.1	100847050;89796;89796	-3846;0;0	24652	typicalEnhancer	24147
chr10	121410955	121447208	36254	*	5	7560	24634.6	5_GES1-WT_peak_6524_lociStitched	Promoter (<=1kb)	10	121410882	121437329	26448	1	9531	uc001lem.3	73	ENSG00000151929	BAG3	BAG cochaperone 3	uc001lel.3;uc001lem.3	9531;9531	0;0	24634.6	typicalEnhancer	24146
chr16	21512589	21533488	20900	*	5	5615	24628.6	5_GES1-WT_peak_15372_lociStitched	Promoter (<=1kb)	16	21475024	21531765	56742	2	100271836	uc002dja.3	0	ENSG00000180747	SMG1P3	SMG1 pseudogene 3	uc002dja.3;uc002djd.3	100271836;387254	0;0	24628.6	typicalEnhancer	24145
chr6	100716354	100749007	32654	*	6	5252	24627.6	6_GES1-WT_peak_35750_lociStitched	Distal Intergenic	6	100836750	100911811	75062	2	6492	uc003pqj.4	162804	ENSG00000112246	SIM1	SIM bHLH transcription factor 1	NA	NA	NA	24627.6	typicalEnhancer	24144
chr16	88836674	88851985	15312	*	4	4081	24601.8	4_GES1-WT_peak_16363_lociStitched	Promoter (<=1kb)	16	88781746	88851372	69627	2	9780	uc010vpb.2	0	ENSG00000103335	PIEZO1	piezo type mechanosensitive ion channel component 1	uc010vpb.2	9780	0	24601.8	typicalEnhancer	24143
chr1	159461304	159463782	2479	*	1	2480	24548.8	1_GES1-WT_peak_2951_lociStitched	Distal Intergenic	1	159504868	159505797	930	2	127385	uc010piw.2	42015	ENSG00000184155	OR10J5	olfactory receptor family 10 subfamily J member 5	NA	NA	NA	24548.8	typicalEnhancer	24142
chr13	33853273	33860440	7168	*	4	2426	24532.5	4_GES1-WT_peak_11257_lociStitched	Promoter (<=1kb)	13	33677272	33859901	182630	2	90627	uc001uuw.3	0	ENSG00000133121	STARD13	StAR related lipid transfer domain containing 13	uc031qlc.1;uc001uuw.3;uc001uux.3;uc010abh.1	100874241;90627;90627;90627	0;0;0;0	24532.5	typicalEnhancer	24141
chr9	110036408	110046693	10286	*	4	4283	24509.5	4_GES1-WT_peak_42141_lociStitched	Promoter (<=1kb)	9	110045517	110087594	42078	1	5887	uc011lwa.2	0	ENSG00000119318	RAD23B	RAD23 homolog B, nucleotide excision repair protein	uc011lwa.2;uc004bde.3;uc022blj.1;uc011lwb.2	5887;5887;5887;5887	0;0;0;-357	24509.5	typicalEnhancer	24140
chr19	781781	810994	29214	*	4	4122	24501.8	4_GES1-WT_peak_19345_lociStitched	Promoter (<=1kb)	19	804940	805001	62	1	100616459	uc021uly.2	0	ENSG00000284361	MIR4745	microRNA 4745	uc021uma.1;uc021uly.2;uc002lpp.2;uc002lpq.2;uc002lpr.2;uc002lpw.2;uc002lpx.2;uc002lpy.2	100422854;100616459;5725;5725;5725;79948;79948;79948	-2590;0;0;0;0;10958;10958;10973	24501.8	typicalEnhancer	24139
chr9	113596927	113606054	9128	*	3	3184	24470.3	3_GES1-WT_peak_42219_lociStitched	Distal Intergenic	9	113636054	113761746	125693	2	1902	uc004bfa.3	155692	ENSG00000198121	LPAR1	lysophosphatidic acid receptor 1	NA	NA	NA	24470.3	typicalEnhancer	24138
chr7	44766930	44788733	21804	*	4	4658	24451	4_GES1-WT_peak_37559_lociStitched	Promoter (<=1kb)	7	44788180	44809479	21300	1	83637	uc003tlq.3	0	ENSG00000122515	ZMIZ2	zinc finger MIZ-type containing 2	uc003tlq.3;uc003tlr.3	83637;83637	0;0	24451	typicalEnhancer	24137
chr19	43239105	43242511	3407	*	2	3030	24435.7	2_GES1-WT_peak_20355_lociStitched	Intron (uc002oue.3/5671, intron 2 of 6)	19	43225794	43244668	18875	2	5671	uc002oue.3	2157	ENSG00000221826	PSG3	pregnancy specific beta-1-glycoprotein 3	uc002oug.1;uc002oue.3;uc002ouf.3	5669;5671;5671	0;0;0	24435.7	typicalEnhancer	24136
chr7	107635693	107671040	35348	*	5	7583	24429	5_GES1-WT_peak_38502_lociStitched	Promoter (<=1kb)	7	107564246	107642448	78203	2	3912	uc003vev.2	0	ENSG00000091136	LAMB1	laminin subunit beta 1	uc003vey.2;uc010ljo.1;uc010ljp.1;uc003vev.2;uc003vew.2;uc003vex.3;uc010ljn.1	22798;22798;22798;3912;3912;3912;3912	0;0;0;0;0;0;0	24429	typicalEnhancer	24135
chr14	51228926	51243290	14365	*	4	4810	24416.2	4_GES1-WT_peak_12526_lociStitched	Exon (uc001wyi.3/51199, exon 8 of 31)	14	51193951	51206205	12255	2	51199	uc001wyn.3	-22721	ENSG00000100503	NIN	ninein	uc001wyi.3;uc001wyj.3;uc001wyk.3;uc001wym.2;uc001wyo.3;uc001wyp.1	51199;51199;51199;51199;51199;51199	0;0;0;0;0;0	24416.2	typicalEnhancer	24134
chr10	3928497	3940287	11791	*	2	3720	24379.1	2_GES1-WT_peak_4559_lociStitched	Distal Intergenic	10	3822519	3827473	4955	2	1316	uc001ihb.2	-101024	ENSG00000067082	KLF6	Kruppel like factor 6	NA	NA	NA	24379.1	typicalEnhancer	24133
chr6	22880086	22906287	26202	*	3	4111	24365.2	3_GES1-WT_peak_34643_lociStitched	Distal Intergenic	6	22569678	22570750	1073	1	154150	uc003nds.3	310408	ENSG00000112273	HDGFL1	HDGF like 1	NA	NA	NA	24365.2	typicalEnhancer	24132
chr4	84030718	84050612	19895	*	5	5055	24337.6	5_GES1-WT_peak_30462_lociStitched	Promoter (<=1kb)	4	84011211	84031012	19802	2	51316	uc003hoe.3	0	ENSG00000145287	PLAC8	placenta associated 8	uc003hoe.3;uc010ijy.3;uc010ijz.3;uc011cco.2;uc003hod.2	51316;51316;51316;51316;51316	0;0;0;0;0	24337.6	typicalEnhancer	24131
chr5	143445015	143453579	8565	*	3	2479	24328	3_GES1-WT_peak_33522_lociStitched	Distal Intergenic	5	143537723	143550278	12556	2	81555	uc003lnk.5	96699	ENSG00000145817	YIPF5	Yip1 domain family member 5	NA	NA	NA	24328	typicalEnhancer	24130
chr10	101535213	101540572	5360	*	2	2949	24274.9	2_GES1-WT_peak_6195_lociStitched	Promoter (1-2kb)	10	101542463	101611662	69200	1	1244	uc001kqf.2	-1891	ENSG00000023839	ABCC2	ATP binding cassette subfamily C member 2	uc001kqf.2	1244	-1891	24274.9	typicalEnhancer	24129
chr9	98261806	98274602	12797	*	4	3827	24263.1	4_GES1-WT_peak_41980_lociStitched	Promoter (<=1kb)	9	98205264	98269481	64218	2	5727	uc010mro.3	0	ENSG00000185920	PTCH1	patched 1	uc010mro.3;uc010mrp.3;uc004avl.4;uc010mrq.3;uc004avk.4;uc004avm.4;uc010mrr.3;uc010mrt.1;uc010mru.1;uc004avo.2;uc010mrv.1;uc010mrw.1	5727;5727;5727;5727;5727;5727;5727;5727;5727;5727;5727;5727	0;0;0;0;0;0;0;0;0;0;0;0	24263.1	typicalEnhancer	24128
chr10	63836401	63854902	18502	*	3	4842	24259.8	3_GES1-WT_peak_5493_lociStitched	3' UTR	10	63808970	63856707	47738	1	84159	uc001jlu.2	27431	ENSG00000150347	ARID5B	AT-rich interaction domain 5B	uc001jlt.2;uc001jlu.2	84159;84159	0;0	24259.8	typicalEnhancer	24127
chrX	29670210	29682501	12292	*	3	4479	24257	3_GES1-WT_peak_43335_lociStitched	Intron (uc004dby.2/11141, intron 5 of 10)	23	30233675	30238206	4532	1	4113	uc004dbz.3	-551174	ENSG00000099399	MAGEB2	MAGE family member B2	uc004dby.2	11141	0	24257	typicalEnhancer	24126
chr8	132857190	132870930	13741	*	2	3487	24233.6	2_GES1-WT_peak_40745_lociStitched	Distal Intergenic	8	132916356	133025886	109531	1	23167	uc003yte.3	-45426	ENSG00000132294	EFR3A	EFR3 homolog A	NA	NA	NA	24233.6	typicalEnhancer	24125
chrX	45331939	45340451	8513	*	4	3245	24229.7	4_GES1-WT_peak_43510_lociStitched	Distal Intergenic	23	45589988	45592021	2034	1	392452	uc031tjh.1	-249537	NA	MFFP3	MFF pseudogene 3	NA	NA	NA	24229.7	typicalEnhancer	24124
chr20	30134654	30161925	27272	*	3	4535	24225.7	3_GES1-WT_peak_24782_lociStitched	Promoter (<=1kb)	20	30135185	30136019	835	1	100101490	uc010gdt.3	0	ENSG00000101898	MCTS2P	MCTS family member 2, pseudogene	uc010gdt.3;uc031rsr.1;uc002wwc.3;uc002wwd.3;uc002wwe.3	100101490;100874042;81502;81502;81502	0;0;0;0;0	24225.7	typicalEnhancer	24123
chr1	116037646	116040812	3167	*	1	3168	24202.2	1_GES1-WT_peak_2398_lociStitched	Distal Intergenic	1	116184574	116240845	56272	1	81839	uc001efv.1	-143762	ENSG00000173218	VANGL1	VANGL planar cell polarity protein 1	NA	NA	NA	24202.2	typicalEnhancer	24122
chr11	9779849	9798543	18695	*	5	6034	24198.8	5_GES1-WT_peak_6897_lociStitched	Promoter (<=1kb)	11	9776317	9781080	4764	2	440028	uc001mhy.1	0	ENSG00000245522	LINC02709	long intergenic non-protein coding RNA 2709	uc001mhz.1;uc001mhy.1;uc001mic.2;uc001mid.2;uc001mib.2	283104;440028;81846;81846;81846	0;0;10977;0;0	24198.8	typicalEnhancer	24121
chr2	28514202	28529803	15602	*	4	4277	24198.7	4_GES1-WT_peak_21274_lociStitched	Exon (uc002rlp.2/9577, exon 11 of 12)	2	28530558	28533326	2769	2	100505716	uc002rly.3	3523	ENSG00000223522	LOC100505716	uncharacterized LOC100505716	uc002rly.3;uc002rlp.2;uc002rlq.3;uc002rlr.3;uc002rls.3;uc002rlt.3;uc002rlu.3;uc002rlv.3	100505716;9577;9577;9577;9577;9577;9577;9577	3523;0;0;0;0;0;0;0	24198.7	typicalEnhancer	24120
chr15	67334231	67342740	8510	*	4	2664	24192.2	4_GES1-WT_peak_14210_lociStitched	Distal Intergenic	15	67358195	67487533	129339	1	4088	uc002aqj.3	-15455	ENSG00000166949	SMAD3	SMAD family member 3	NA	NA	NA	24192.2	typicalEnhancer	24119
chr15	66585505	66588377	2873	*	1	2874	24186.1	1_GES1-WT_peak_14171_lociStitched	Promoter (<=1kb)	15	66585633	66618702	33070	1	115752	uc010ujl.1	0	ENSG00000166938	DIS3L	DIS3 like exosome 3'-5' exoribonuclease	uc010ujl.1;uc002app.3;uc002apq.2;uc010ujm.2;uc010bho.3	115752;115752;115752;115752;115752	0;0;0;0;0	24186.1	typicalEnhancer	24118
chr17	17584750	17598665	13916	*	3	4200	24180.4	3_GES1-WT_peak_16804_lociStitched	Promoter (<=1kb)	17	17584787	17714765	129979	1	10743	uc002grm.3	0	ENSG00000108557	RAI1	retinoic acid induced 1	uc002grm.3	10743	0	24180.4	typicalEnhancer	24117
chr9	131673411	131685266	11856	*	2	3387	24155.4	2_GES1-WT_peak_42702_lociStitched	Promoter (<=1kb)	9	131683174	131704320	21147	1	254295	uc004bwn.2	0	ENSG00000175287	PHYHD1	phytanoyl-CoA dioxygenase domain containing 1	uc004bwn.2;uc004bwo.2;uc004bwm.2;uc004bwp.2;uc004bwl.4;uc010myp.3;uc010myq.3	254295;254295;254295;254295;56262;56262;56262	0;0;0;0;0;0;0	24155.4	typicalEnhancer	24116
chr1	72748820	72751952	3133	*	2	2720	24142.9	2_GES1-WT_peak_1738_lociStitched	Promoter (<=1kb)	1	71868625	72748405	879781	2	257194	uc010oqs.2	-415	ENSG00000172260	NEGR1	neuronal growth regulator 1	uc001dfw.3;uc010oqs.2	257194;257194	-415;-415	24142.9	typicalEnhancer	24115
chr1	231935638	231964862	29225	*	5	5107	24134	5_GES1-WT_peak_4178_lociStitched	Promoter (<=1kb)	1	231950372	231954263	3892	2	27184	uc001hvd.3	0	NA	DISC2	disrupted in schizophrenia 2	uc010pwg.1;uc010pwh.1;uc010pwi.1;uc010pwj.1;uc010pwk.1;uc010pwl.2;uc001hvd.3;uc010pwr.1;uc010pws.1;uc010pwt.1;uc010pwu.1;uc010pwv.2;uc010pww.2;uc010pwx.2;uc001huy.3;uc010pwy.2;uc010pwz.2;uc010pxa.2;uc010pxb.1;uc010pxc.1;uc009xfr.3;uc010pxd.2;uc010pxe.2;uc010pxf.2;uc010pxg.2;uc010pxi.1;uc010pxj.1;uc010pxk.1;uc010pxl.1;uc010pxn.1;uc001huz.3;uc001hva.3;uc010pxh.2;uc010pxm.2	100303453;100303453;100303453;100303453;100303453;100303453;27184;27185;27185;27185;27185;27185;27185;27185;27185;27185;27185;27185;27185;27185;27185;27185;27185;27185;27185;27185;27185;27185;27185;27185;27185;27185;27185;27185	0;0;0;0;0;0;0;0;0;0;0;0;0;0;0;0;0;0;0;0;0;0;0;0;0;0;0;0;0;0;0;0;0;0	24134	typicalEnhancer	24114
chr10	13991282	14033052	41771	*	6	7532	24076.8	6_GES1-WT_peak_4727_lociStitched	Promoter (<=1kb)	10	13708097	14014369	306273	2	55691	uc001imt.1	0	ENSG00000151474	FRMD4A	FERM domain containing 4A	uc001ims.3;uc009xjf.1;uc001imt.1;uc001imu.1	55691;55691;55691;55691	0;0;0;0	24076.8	typicalEnhancer	24113
chr11	694811	708580	13770	*	3	4552	24072.7	3_GES1-WT_peak_6746_lociStitched	Promoter (<=1kb)	11	644225	695740	51516	2	10522	uc001lqq.1	0	ENSG00000177030	DEAF1	DEAF1 transcription factor	uc001lqq.1;uc021qbn.1;uc001lqr.4;uc001lqs.4;uc031pya.1;uc010qwi.2;uc010qwj.1;uc001lqt.3;uc001lqu.3;uc010qwk.2;uc001lqv.3	10522;10522;283232;283232;283232;283232;64787;64787;64787;64787;64787	0;0;0;0;0;0;0;0;0;0;0	24072.7	typicalEnhancer	24112
chr16	24637464	24664528	27065	*	5	5535	24071.6	5_GES1-WT_peak_15423_lociStitched	Distal Intergenic	16	24565798	24584183	18386	1	5930	uc002dmk.3	71666	ENSG00000122257	RBBP6	RB binding protein 6, ubiquitin ligase	NA	NA	NA	24071.6	typicalEnhancer	24111
chr9	98616057	98620222	4166	*	3	3042	24062	3_GES1-WT_peak_41995_lociStitched	Intron (uc004avp.4/100128782, intron 1 of 2)	9	98637900	98717204	79305	1	375748	uc010mrx.1	-17678	ENSG00000182150	ERCC6L2	ERCC excision repair 6 like 2	uc004avp.4;uc004avr.2	100128782;100128782	0;0	24062	typicalEnhancer	24110
chr7	27716776	27719189	2414	*	1	2415	24056	1_GES1-WT_peak_37250_lociStitched	Distal Intergenic	7	27565059	27702620	137562	2	11112	uc003szg.3	-14156	ENSG00000106049	HIBADH	3-hydroxyisobutyrate dehydrogenase	NA	NA	NA	24056	typicalEnhancer	24109
chr11	12294259	12310164	15906	*	3	4177	24049.9	3_GES1-WT_peak_6979_lociStitched	Promoter (<=1kb)	11	12308447	12380691	72245	1	84953	uc001mkg.1	0	NA	NA	NA	uc001mkg.1	84953	0	24049.9	typicalEnhancer	24108
chr8	12958324	12990687	32364	*	9	6019	24007.6	9_GES1-WT_peak_39256_lociStitched	Promoter (<=1kb)	8	12940872	12973753	32882	2	10395	uc011kxx.1	0	ENSG00000164741	DLC1	DLC1 Rho GTPase activating protein	uc011kxx.1;uc003wwk.1;uc003wwl.1;uc003wwm.2	10395;10395;10395;10395	0;0;0;0	24007.6	typicalEnhancer	24107
chr10	178765	182128	3364	*	1	3365	23994.4	1_GES1-WT_peak_4495_lociStitched	Promoter (<=1kb)	10	180405	300577	120173	1	10771	uc010pzu.2	0	ENSG00000015171	ZMYND11	zinc finger MYND-type containing 11	uc010pzu.2;uc001ifk.3;uc010pzv.2;uc010pzw.2;uc001ifm.3	10771;10771;10771;10771;10771	0;0;0;0;0	23994.4	typicalEnhancer	24106
chr17	54671069	54676498	5430	*	4	3109	23972.4	4_GES1-WT_peak_17654_lociStitched	Promoter (<=1kb)	17	54671060	54672951	1892	1	9241	uc002iup.2	9	ENSG00000183691	NOG	noggin	uc002iup.2	9241	0	23972.4	typicalEnhancer	24105
chr9	97434330	97436636	2307	*	1	2308	23961	1_GES1-WT_peak_41945_lociStitched	Distal Intergenic	9	97365421	97402531	37111	2	2203	uc010mrl.3	-31799	ENSG00000165140	FBP1	fructose-bisphosphatase 1	NA	NA	NA	23961	typicalEnhancer	24104
chr15	74216210	74244125	27916	*	4	5692	23940.8	4_GES1-WT_peak_14396_lociStitched	Promoter (<=1kb)	15	74209809	74220127	10319	2	100287616	uc002awa.2	0	ENSG00000261801	LOXL1-AS1	LOXL1 antisense RNA 1	uc002awa.2;uc021spy.1;uc021spz.1;uc002awb.2;uc021sqa.1;uc002awc.1	100287616;100287616;100287616;100287616;100287616;4016	0;0;0;0;0;0	23940.8	typicalEnhancer	24103
chr16	56640271	56661363	21093	*	3	5516	23921.6	3_GES1-WT_peak_15742_lociStitched	Promoter (<=1kb)	16	56642478	56673999	31522	1	4489	uc002eji.3	0	ENSG00000205362	MT1A	metallothionein 1A	uc002eji.3;uc002ejl.3;uc002ejm.3;uc010vhe.2;uc002ejj.4;uc002ejh.3	4489;4493;4493;4499;4500;4502	0;0;0;0;0;0	23921.6	typicalEnhancer	24102
chr7	103272815	103281228	8414	*	3	4100	23917.6	3_GES1-WT_peak_38425_lociStitched	Exon (uc010liz.3/5649, exon 17 of 64)	7	103014655	103086624	71970	2	375611	uc003vbz.3	-186191	ENSG00000170615	SLC26A5	solute carrier family 26 member 5	uc010liz.3;uc022ajq.1;uc022ajr.1	5649;5649;5649	0;0;0	23917.6	typicalEnhancer	24101
chr10	63511358	63521859	10502	*	4	3073	23874.2	4_GES1-WT_peak_5469_lociStitched	Exon (uc010qik.2/219621, exon 5 of 7)	10	63422719	63526091	103373	1	219621	uc010qik.2	88639	ENSG00000183346	CABCOCO1	ciliary associated calcium binding coiled-coil 1	uc010qik.2	219621	0	23874.2	typicalEnhancer	24100
chr19	56135636	56167318	31683	*	6	5578	23838.3	6_GES1-WT_peak_20857_lociStitched	Promoter (<=1kb)	19	56165416	56186082	20667	1	11338	uc002qlt.3	0	ENSG00000063244	U2AF2	U2 small nuclear RNA auxiliary factor 2	uc002qlt.3;uc002qlu.3;uc010etb.1;uc002qll.1;uc002qlr.3;uc021vcc.1;uc021vcd.1;uc002qls.3;uc002qlo.3;uc002qlp.3;uc010ygd.2;uc002qln.3;uc002qlq.3	11338;11338;147808;147808;29903;29903;29903;29903;51157;51157;51157;51545;51545	0;0;0;0;0;0;0;0;0;0;0;0;0	23838.3	typicalEnhancer	24099
chr6	48792988	48802985	9998	*	3	3198	23785.2	3_GES1-WT_peak_35275_lociStitched	Distal Intergenic	6	49398073	49431041	32969	2	4594	uc003ozg.4	628056	ENSG00000146085	MMUT	methylmalonyl-CoA mutase	NA	NA	NA	23785.2	typicalEnhancer	24098
chr1	56183464	56193695	10232	*	4	3233	23723.9	4_GES1-WT_peak_1469_lociStitched	Intron (uc001cyi.1/uc001cyi.1, intron 2 of 2)	1	55691314	55691396	83	1	100616272	uc021ony.1	492150	ENSG00000265822	MIR4422	microRNA 4422	NA	NA	NA	23723.9	typicalEnhancer	24097
chr2	226331767	226359940	28174	*	5	6704	23711.2	5_GES1-WT_peak_24025_lociStitched	Intron (uc002voe.2/57624, intron 2 of 5)	2	226265602	226518734	253133	1	57624	uc010fxa.1	66165	ENSG00000144460	NYAP2	neuronal tyrosine-phosphorylated phosphoinositide-3-kinase adaptor 2	uc002voe.2;uc010fxa.1	57624;57624	0;0	23711.2	typicalEnhancer	24096
chr5	131698753	131706093	7341	*	4	3022	23710	4_GES1-WT_peak_33223_lociStitched	Promoter (<=1kb)	5	131701182	131701291	110	2	100500865	uc021ydk.1	0	ENSG00000263597	MIR3936	microRNA 3936	uc021ydk.1;uc021ydj.1;uc003kwu.1;uc003kww.4;uc003kwx.4	100500865;553103;553103;6584;6584	0;0;0;0;0	23710	typicalEnhancer	24095
chr6	140887532	140894508	6977	*	4	3409	23680.6	4_GES1-WT_peak_36296_lociStitched	Distal Intergenic	6	141004951	141005020	70	1	100616180	uc021zge.1	-110443	ENSG00000264390	MIR4465	microRNA 4465	NA	NA	NA	23680.6	typicalEnhancer	24094
chr5	61259261	61266332	7072	*	4	3097	23670	4_GES1-WT_peak_32359_lociStitched	Distal Intergenic	5	60933636	61002362	68727	1	285668	uc003jst.1	325625	ENSG00000178722	C5orf64	chromosome 5 putative open reading frame 64	NA	NA	NA	23670	typicalEnhancer	24093
chr6	134857433	134873510	16078	*	3	3930	23650.7	3_GES1-WT_peak_36174_lociStitched	Exon (uc003qev.1/uc003qev.1, exon 3 of 11)	6	134785879	134825158	39280	1	154092	uc003qeu.2	71554	ENSG00000236700	LINC01010	long intergenic non-protein coding RNA 1010	NA	NA	NA	23650.7	typicalEnhancer	24092
chr6	135229514	135242551	13038	*	3	4057	23640.5	3_GES1-WT_peak_36190_lociStitched	3' UTR	6	135238528	135271260	32733	2	64577	uc003qew.3	28709	ENSG00000118514	ALDH8A1	aldehyde dehydrogenase 8 family member A1	uc003qew.3;uc003qex.3;uc010kgh.3;uc011ecx.2	64577;64577;64577;64577	0;0;0;0	23640.5	typicalEnhancer	24091
chr9	131929525	131939429	9905	*	3	4012	23634.3	3_GES1-WT_peak_42711_lociStitched	Promoter (1-2kb)	9	131937831	131940540	2710	2	389792	uc010myt.1	1111	ENSG00000188483	IER5L	immediate early response 5 like	uc010myt.1	389792	0	23634.3	typicalEnhancer	24090
chr3	159429293	159452518	23226	*	4	5445	23616.2	4_GES1-WT_peak_29080_lociStitched	Intron (uc003fcq.2/100505385, intron 4 of 10)	3	159481930	159612500	130571	1	100505385	uc010hvz.1	-29412	ENSG00000283154	IQCJ-SCHIP1	IQCJ-SCHIP1 readthrough	uc003fcq.2;uc003fcr.2;uc003fcs.2;uc003fct.2;uc021xgm.1	100505385;100505385;29970;29970;29970	0;0;0;0;0	23616.2	typicalEnhancer	24089
chr3	11210464	11281147	70684	*	9	8494	23608.5	9_GES1-WT_peak_27076_lociStitched	Promoter (<=1kb)	3	11267669	11304939	37271	1	3269	uc010hdt.3	0	ENSG00000196639	HRH1	histamine receptor H1	uc010hdr.3;uc010hds.3;uc010hdt.3	3269;3269;3269	0;0;0	23608.5	typicalEnhancer	24088
chr9	109677733	109683746	6014	*	2	2944	23606.8	2_GES1-WT_peak_42133_lociStitched	Intron (uc004bcz.3/58499, intron 1 of 12)	9	109686414	109773796	87383	1	58499	uc004bda.3	-2668	ENSG00000148143	ZNF462	zinc finger protein 462	uc022bli.1;uc004bcz.3;uc004bda.3;uc010mto.3	100313841;58499;58499;58499	0;0;0;0	23606.8	typicalEnhancer	24087
chr12	45624975	45629462	4488	*	3	3674	23599.7	3_GES1-WT_peak_9425_lociStitched	Intron (uc031qha.1/196527, intron 1 of 17)	12	45566817	45609789	42973	2	51054	uc001rom.2	-15186	ENSG00000134297	PLEKHA8P1	pleckstrin homology domain containing A8 pseudogene 1	uc031qha.1;uc001roo.3;uc010slf.2;uc010sld.1	196527;196527;196527;196527	0;0;0;0	23599.7	typicalEnhancer	24086
chr11	29303410	29355833	52424	*	7	7880	23590.8	7_GES1-WT_peak_7208_lociStitched	Distal Intergenic	11	30031288	30038577	7290	2	3739	uc001msk.3	682744	ENSG00000182255	KCNA4	potassium voltage-gated channel subfamily A member 4	NA	NA	NA	23590.8	typicalEnhancer	24085
chr9	33319614	33330074	10461	*	2	4303	23585.4	2_GES1-WT_peak_41247_lociStitched	Exon (uc011lnw.2/4799, exon 10 of 16)	9	33290418	33371155	80738	1	4799	uc003zsr.3	29196	ENSG00000086102	NFX1	nuclear transcription factor, X-box binding 1	uc011lnw.2;uc003zso.3;uc003zsp.2;uc010mjr.2;uc003zsq.3;uc003zsr.3	4799;4799;4799;4799;4799;4799	0;0;0;0;0;0	23585.4	typicalEnhancer	24084
chr1	99907020	99932186	25167	*	4	7221	23546.2	4_GES1-WT_peak_2160_lociStitched	Distal Intergenic	1	99729848	99775138	45291	1	9890	uc010oue.2	177172	ENSG00000117600	PLPPR4	phospholipid phosphatase related 4	NA	NA	NA	23546.2	typicalEnhancer	24083
chr3	168822549	168831003	8455	*	2	3825	23521.8	2_GES1-WT_peak_29148_lociStitched	Exon (uc010hwk.1/2122, exon 7 of 15)	3	168801287	168851758	50472	2	2122	uc010hwk.1	20755	ENSG00000085276	MECOM	MDS1 and EVI1 complex locus	uc010hwk.1;uc003ffi.3;uc003ffj.3;uc011bpi.1;uc003ffn.3;uc003ffk.2;uc003ffl.2;uc011bpj.1;uc011bpk.1;uc010hwn.2	2122;2122;2122;2122;2122;2122;2122;2122;2122;2122	0;0;0;0;0;0;0;0;0;0	23521.8	typicalEnhancer	24082
chr9	91381132	91404621	23490	*	4	5244	23520.5	4_GES1-WT_peak_41849_lociStitched	Distal Intergenic	9	91360751	91360820	70	2	100423015	uc022bjl.1	-20312	ENSG00000265873	MIR4289	microRNA 4289	NA	NA	NA	23520.5	typicalEnhancer	24081
chr10	62702942	62738549	35608	*	6	6068	23487	6_GES1-WT_peak_5452_lociStitched	Promoter (<=1kb)	10	62629198	62704033	74836	2	9886	uc001jlh.3	0	ENSG00000072422	RHOBTB1	Rho related BTB domain containing 1	uc009xpe.2;uc001jlh.3;uc001jli.3;uc001jlj.3;uc001jlk.3;uc001jlm.3	9886;9886;9886;9886;9886;9886	0;0;0;0;0;0	23487	typicalEnhancer	24080
chr1	218746808	218779125	32318	*	4	5336	23462.9	4_GES1-WT_peak_3954_lociStitched	Distal Intergenic	1	218517538	218519020	1483	2	728463	uc031psd.1	-227788	ENSG00000232480	TGFB2-AS1	TGFB2 antisense RNA 1 (head to head)	NA	NA	NA	23462.9	typicalEnhancer	24079
chr10	75239515	75255593	16079	*	2	4391	23457.7	2_GES1-WT_peak_5692_lociStitched	Promoter (<=1kb)	10	75196563	75255782	59220	2	5532	uc001jue.3	189	ENSG00000107758	PPP3CB	protein phosphatase 3 catalytic subunit beta	uc010qkk.2;uc001juk.3;uc001jul.3;uc001jum.3;uc001jun.3;uc001juo.3;uc001jue.3;uc001juf.3;uc001jug.3;uc001juh.2;uc001jui.2	159195;159195;159195;159195;159195;159195;5532;5532;5532;5532;5532	27915;35000;35000;45903;57505;79840;0;0;0;0;0	23457.7	typicalEnhancer	24078
chr7	46408899	46427110	18212	*	3	4747	23429.7	3_GES1-WT_peak_37599_lociStitched	Distal Intergenic	7	45951844	45960871	9028	2	3486	uc003tnt.3	-448028	ENSG00000146674	IGFBP3	insulin like growth factor binding protein 3	NA	NA	NA	23429.7	typicalEnhancer	24077
chr20	35917749	35924789	7041	*	2	3448	23394.4	2_GES1-WT_peak_24954_lociStitched	Promoter (<=1kb)	20	35918051	35945663	27613	1	63905	uc002xgu.3	0	ENSG00000101363	MANBAL	mannosidase beta like	uc002xgu.3;uc002xgv.3;uc002xgw.3	63905;63905;63905	0;0;0	23394.4	typicalEnhancer	24076
chr17	40476807	40482306	5500	*	3	3330	23392.6	3_GES1-WT_peak_17310_lociStitched	Exon (uc002hzk.1/6774, exon 12 of 24)	17	40458134	40461704	3571	1	6776	uc010cye.1	18673	ENSG00000126561	STAT5A	signal transducer and activator of transcription 5A	uc002hzk.1;uc002hzl.1;uc002hzm.1;uc002hzn.1;uc010wgh.1	6774;6774;6774;6774;6774	0;0;0;0;0	23392.6	typicalEnhancer	24075
chr15	63137432	63144091	6660	*	2	2390	23377.3	2_GES1-WT_peak_14079_lociStitched	Distal Intergenic	15	63116156	63116240	85	1	406965	uc010uid.1	21276	ENSG00000211137	MIR190A	microRNA 190a	uc002alb.4;uc002alc.4;uc010uic.2	83660;83660;83660	0;0;0	23377.3	typicalEnhancer	24074
chr6	150167698	150185437	17740	*	4	5567	23365.4	4_GES1-WT_peak_36450_lociStitched	Promoter (<=1kb)	6	150184634	150240644	56011	1	100652739	uc003qni.2	0	ENSG00000223701	RAET1E-AS1	RAET1E antisense RNA 1	uc003qni.2;uc003qng.2;uc003qnh.1	100652739;84918;84918	0;0;0	23365.4	typicalEnhancer	24073
chrX	31349595	31357720	8126	*	3	4080	23363.9	3_GES1-WT_peak_43348_lociStitched	Exon (uc022bul.1/uc022bul.1, exon 1 of 1)	23	31196312	31285024	88713	2	1756	uc010ngm.3	-64571	ENSG00000198947	DMD	dystrophin	uc004dcq.1;uc004dcr.1;uc004dcs.1;uc004dct.1;uc004dcu.1;uc004dcv.1;uc004dcw.2;uc004dcx.2;uc004dcz.2;uc004dcy.1;uc004dda.1;uc004ddb.1	1756;1756;1756;1756;1756;1756;1756;1756;1756;1756;1756;1756	0;0;0;0;0;0;0;0;0;0;0;0	23363.9	typicalEnhancer	24072
chr8	25032212	25054239	22028	*	6	6081	23358.5	6_GES1-WT_peak_39467_lociStitched	Promoter (<=1kb)	8	25042287	25162809	120523	1	80005	uc003xef.3	0	ENSG00000147459	DOCK5	dedicator of cytokinesis 5	uc003xef.3;uc010luf.1;uc003xeg.3	80005;80005;80005	0;0;0	23358.5	typicalEnhancer	24071
chr2	205528687	205531261	2575	*	1	2576	23356.5	1_GES1-WT_peak_23666_lociStitched	Intron (uc010fub.2/117583, intron 1 of 18)	2	205410516	206484886	1074371	1	117583	uc002var.2	118171	ENSG00000116117	PARD3B	par-3 family cell polarity regulator beta	uc010fub.2;uc002vao.2;uc002vap.2;uc002vaq.2;uc002var.2	117583;117583;117583;117583;117583	0;0;0;0;0	23356.5	typicalEnhancer	24070
chr3	143764291	143775650	11360	*	5	4115	23286.9	5_GES1-WT_peak_28829_lociStitched	Distal Intergenic	3	143692167	143711210	19044	1	205428	uc011bnl.2	72124	ENSG00000181744	DIPK2A	divergent protein kinase domain 2A	NA	NA	NA	23286.9	typicalEnhancer	24069
chr3	185446564	185464162	17599	*	8	4722	23285.2	8_GES1-WT_peak_29397_lociStitched	Exon (uc003fps.4/646600, exon 7 of 8)	3	185431040	185447575	16536	1	646600	uc003fps.4	15524	ENSG00000163915	IGF2BP2-AS1	IGF2BP2 antisense RNA 1	uc010hyi.3;uc010hyj.3;uc010hyk.3;uc010hyl.3;uc003fpo.3;uc003fpp.3;uc003fpq.3;uc003fps.4	10644;10644;10644;10644;10644;10644;10644;646600	0;0;0;0;0;0;0;0	23285.2	typicalEnhancer	24068
chr6	78001235	78004134	2900	*	1	2901	23269.6	1_GES1-WT_peak_35563_lociStitched	Distal Intergenic	6	78171948	78173120	1173	2	3351	uc003pil.1	168986	ENSG00000135312	HTR1B	5-hydroxytryptamine receptor 1B	NA	NA	NA	23269.6	typicalEnhancer	24067
chr19	42579509	42626760	47252	*	6	7080	23257.4	6_GES1-WT_peak_20333_lociStitched	Promoter (<=1kb)	19	42580290	42585720	5431	1	64763	uc002osm.4	0	ENSG00000105732	ZNF574	zinc finger protein 574	uc002osn.3;uc002osp.3;uc002osq.3;uc002osr.2;uc002osk.4;uc002osm.4	5452;5452;5452;5452;64763;64763	0;0;0;0;0;0	23257.4	typicalEnhancer	24066
chr9	109641022	109660179	19158	*	5	3628	23215.7	5_GES1-WT_peak_42129_lociStitched	Exon (uc022bli.1/100313841, exon 2 of 2)	9	109625378	109773796	148419	1	58499	uc004bcz.3	15644	ENSG00000148143	ZNF462	zinc finger protein 462	uc022bli.1;uc004bcz.3	100313841;58499	0;0	23215.7	typicalEnhancer	24065
chr12	6642018	6661913	19896	*	6	4708	23214.7	6_GES1-WT_peak_8953_lociStitched	Promoter (<=1kb)	12	6647539	6661066	13528	2	25900	uc001qoy.3	0	ENSG00000010295	IFFO1	intermediate filament family orphan 1	uc001qoy.3;uc001qoz.2;uc001qpa.2;uc001qpb.1;uc001qpc.2;uc001qpe.2;uc001qpf.2;uc010sfe.2;uc001qpg.3;uc001qop.2;uc031qfw.1;uc009zeq.3;uc021qtw.2;uc021qtx.2;uc021qtz.2;uc021qua.2;uc009zen.1;uc001qoo.2;uc010sfd.1	25900;25900;25900;25900;25900;25900;25900;25900;25900;2597;2597;4839;4839;4839;4839;4839;9918;9918;9918	0;0;0;0;0;0;0;0;0;0;0;0;0;0;0;0;0;0;0	23214.7	typicalEnhancer	24064
chrX	77906052	77910466	4415	*	2	3699	23213.2	2_GES1-WT_peak_43811_lociStitched	Distal Intergenic	23	77911566	77914825	3260	2	203430	uc004edc.1	4359	ENSG00000179300	RTL3	retrotransposon Gag like 3	uc004edc.1	203430	4359	23213.2	typicalEnhancer	24063
chr15	74679957	74726658	46702	*	7	7612	23210.9	7_GES1-WT_peak_14417_lociStitched	Promoter (<=1kb)	15	74701630	74726001	24372	2	8482	uc010ulk.2	0	ENSG00000138623	SEMA7A	semaphorin 7A (John Milton Hagen blood group)	uc010ulk.2;uc002axv.3;uc010ull.2	8482;8482;8482	0;0;0	23210.9	typicalEnhancer	24062
chrX	61710647	61723139	12493	*	6	3490	23184.5	6_GES1-WT_peak_43700_lociStitched	Distal Intergenic	23	62567107	62571218	4112	2	139886	uc004dvf.3	848079	ENSG00000186767	SPIN4	spindlin family member 4	NA	NA	NA	23184.5	typicalEnhancer	24061
chr9	86571098	86602539	31442	*	5	4272	23175.9	5_GES1-WT_peak_41766_lociStitched	Promoter (<=1kb)	9	86582998	86590713	7716	2	3190	uc004and.4	0	ENSG00000165119	HNRNPK	heterogeneous nuclear ribonucleoprotein K	uc004and.4;uc011lsw.2;uc004anf.4;uc004ang.4;uc004anh.4;uc011lsx.2;uc004anl.4;uc004anm.4;uc004ano.1;uc004anq.4;uc004anr.4;uc004anp.4;uc004anb.3;uc004anc.3	3190;3190;3190;3190;3190;3190;3190;3190;407043;80010;80010;80010;84267;84267	0;0;0;0;0;0;0;0;0;0;0;0;0;0	23175.9	typicalEnhancer	24060
chr1	207063149	207083243	20095	*	4	5417	23159.5	4_GES1-WT_peak_3725_lociStitched	Promoter (<=1kb)	1	207070788	207077484	6697	1	11009	uc001hes.2	0	ENSG00000162892	IL24	interleukin 24	uc001hes.2;uc001heu.2;uc001hev.2;uc001hew.2;uc001hex.2;uc001hey.3;uc010prz.2;uc010psa.2;uc021pif.1	11009;11009;11009;11009;11009;9214;9214;9214;9214	0;0;0;0;0;0;0;0;0	23159.5	typicalEnhancer	24059
chr9	81547113	81549399	2287	*	1	2288	23149.7	1_GES1-WT_peak_41685_lociStitched	Distal Intergenic	9	80912059	80945009	32951	1	29968	uc004alb.3	635054	ENSG00000135069	PSAT1	phosphoserine aminotransferase 1	NA	NA	NA	23149.7	typicalEnhancer	24058
chr1	88260143	88272972	12830	*	2	4376	23141.5	2_GES1-WT_peak_1920_lociStitched	Distal Intergenic	1	87819210	87837338	18129	2	100505768	uc001dmk.3	-422805	ENSG00000227290	LINC01364	long intergenic non-protein coding RNA 1364	NA	NA	NA	23141.5	typicalEnhancer	24057
chr19	45873091	45881079	7989	*	2	3495	23138.5	2_GES1-WT_peak_20500_lociStitched	Promoter (<=1kb)	19	45854649	45873845	19197	2	2068	uc002pbj.2	0	ENSG00000104884	ERCC2	ERCC excision repair 2, TFIIH core complex helicase subunit	uc002pbm.3;uc002pbn.3;uc002pbo.3;uc002pbj.2;uc010ejz.2;uc002pbk.2;uc002pbl.4;uc010xxj.1	10848;10848;10848;2068;2068;2068;2068;2068	15346;0;0;0;0;0;0;0	23138.5	typicalEnhancer	24056
chr8	32542939	32573598	30660	*	8	6098	23102.3	8_GES1-WT_peak_39588_lociStitched	Intron (uc022ats.1/3084, intron 3 of 10)	8	32579351	32622558	43208	1	3084	uc011lbg.1	-5753	ENSG00000157168	NRG1	neuregulin 1	uc022ats.1;uc003xip.3;uc003xir.3;uc010lvl.3;uc010lvm.3;uc003xis.3;uc010lvn.3;uc011lbf.1;uc003xit.2;uc003xiu.2;uc003xiv.2;uc003xiw.2;uc010lvo.2;uc010lvp.2;uc010lvq.2;uc010lvr.2;uc010lvs.2;uc003xix.3;uc003xiy.3	3084;3084;3084;3084;3084;3084;3084;3084;3084;3084;3084;3084;3084;3084;3084;3084;3084;3084;3084	0;0;0;0;0;0;0;0;0;0;0;0;0;0;0;0;0;0;0	23102.3	typicalEnhancer	24055
chr7	107588966	107594234	5269	*	2	3786	23088.2	2_GES1-WT_peak_38498_lociStitched	Exon (uc003vev.2/3912, exon 20 of 32)	7	107564246	107642448	78203	2	3912	uc003vev.2	48214	ENSG00000091136	LAMB1	laminin subunit beta 1	uc003vev.2;uc003vew.2	3912;3912	0;0	23088.2	typicalEnhancer	24054
chr6	151380452	151390919	10468	*	5	3879	23079.8	5_GES1-WT_peak_36485_lociStitched	Exon (uc011een.2/25902, exon 27 of 28)	6	151561134	151679694	118561	1	9590	uc011eep.2	-170215	ENSG00000131016	AKAP12	A-kinase anchoring protein 12	uc011een.2;uc003qob.3;uc021zgs.1;uc021zgt.1;uc003qoc.3	25902;25902;25902;25902;25902	0;0;0;0;0	23079.8	typicalEnhancer	24053
chr8	126225575	126233715	8141	*	2	3855	23074.9	2_GES1-WT_peak_40579_lociStitched	Intron (uc003yrw.2/286053, intron 5 of 7)	8	126104083	126379367	275285	1	286053	uc003yrw.2	121492	ENSG00000156831	NSMCE2	NSE2 (MMS21) homolog, SMC5-SMC6 complex SUMO ligase	uc003yrw.2	286053	0	23074.9	typicalEnhancer	24052
chr10	31272934	31294473	21540	*	3	4593	23054.3	3_GES1-WT_peak_5062_lociStitched	Promoter (<=1kb)	10	31133565	31288446	154882	2	220929	uc001ivn.3	0	ENSG00000183621	ZNF438	zinc finger protein 438	uc001ivn.3;uc001ivo.4;uc001ivp.4;uc009xlg.3;uc010qdy.2;uc010qdz.2;uc010qea.2;uc010qeb.2;uc010qec.1	220929;220929;220929;220929;220929;220929;220929;220929;220929	0;0;0;0;0;0;0;0;0	23054.3	typicalEnhancer	24051
chr7	143066729	143089958	23230	*	5	3637	23051.1	5_GES1-WT_peak_38941_lociStitched	Promoter (<=1kb)	7	143078360	143088206	9847	1	7791	uc003wcw.3	0	ENSG00000159840	ZYX	zyxin	uc003wcz.3;uc011ktd.2;uc003wcw.3;uc003wcx.3;uc011kte.2;uc011ktf.2	2041;7791;7791;7791;7791;7791	0;0;0;0;0;0	23051.1	typicalEnhancer	24050
chr15	39483587	39489140	5554	*	3	2923	23043.5	3_GES1-WT_peak_13689_lociStitched	Distal Intergenic	15	39542885	39547048	4164	1	400360	uc001zkg.2	-53745	ENSG00000175746	LINC02915	long intergenic non-protein coding RNA 2915	NA	NA	NA	23043.5	typicalEnhancer	24049
chr18	11174320	11177485	3166	*	2	2826	23041.5	2_GES1-WT_peak_18544_lociStitched	Distal Intergenic	18	10670244	11148761	478518	2	63895	uc002kos.2	-25559	ENSG00000154864	PIEZO2	piezo type mechanosensitive ion channel component 2	NA	NA	NA	23041.5	typicalEnhancer	24048
chr15	35563600	35599720	36121	*	5	5966	23009.1	5_GES1-WT_peak_13598_lociStitched	Distal Intergenic	15	35529527	35530264	738	1	723972	uc001ziy.3	34073	ENSG00000259516	ANP32AP1	acidic nuclear phosphoprotein 32 family member A pseudogene 1	NA	NA	NA	23009.1	typicalEnhancer	24047
chr5	176921098	176924559	3462	*	1	3463	22987.7	1_GES1-WT_peak_34134_lociStitched	Promoter (<=1kb)	5	176910395	176924602	14208	2	9260	uc003mhb.1	43	ENSG00000196923	PDLIM7	PDZ and LIM domain 7	uc003mhh.4;uc003mhi.4;uc003mhj.4;uc003mha.1;uc003mhb.1;uc003mhc.1;uc003mhd.1;uc003mhe.1;uc003mhf.3;uc003mhg.1	79930;79930;79930;9260;9260;9260;9260;9260;9260;9260	11319;12868;12868;-2156;0;0;0;0;0;0	22987.7	typicalEnhancer	24046
chr11	65045071	65060290	15220	*	3	4299	22976.1	3_GES1-WT_peak_7653_lociStitched	Promoter (<=1kb)	11	65047939	65065088	17150	1	23649	uc001odk.3	0	ENSG00000014138	POLA2	DNA polymerase alpha 2, accessory subunit	uc009yqf.1;uc010rod.1;uc001odj.3;uc001odk.3	23649;23649;23649;23649	0;0;0;0	22976.1	typicalEnhancer	24045
chr14	74207860	74235504	27645	*	6	4913	22948.1	6_GES1-WT_peak_12991_lociStitched	Promoter (<=1kb)	14	74225450	74225522	73	1	100616158	uc021rwi.1	0	ENSG00000264741	MIR4505	microRNA 4505	uc021rwi.1;uc001xot.3;uc001xou.3;uc010tud.1;uc010arw.2	100616158;91748;91748;91748;91748	0;0;0;0;0	22948.1	typicalEnhancer	24044
chr2	43301421	43314595	13175	*	2	3761	22931.1	2_GES1-WT_peak_21547_lociStitched	Distal Intergenic	2	43449541	43453745	4205	2	678	uc002rsv.4	139150	ENSG00000152518	ZFP36L2	ZFP36 ring finger protein like 2	NA	NA	NA	22931.1	typicalEnhancer	24043
chr6	112120007	112146352	26346	*	4	5576	22928.9	4_GES1-WT_peak_35887_lociStitched	Intron (uc003pvk.3/2534, intron 2 of 13)	6	111981535	112115084	133550	2	2534	uc003pvj.3	-4923	ENSG00000010810	FYN	FYN proto-oncogene, Src family tyrosine kinase	uc003pvj.3;uc003pvk.3	2534;2534	-4923;0	22928.9	typicalEnhancer	24042
chr2	201980814	201995924	15111	*	4	5371	22924.9	4_GES1-WT_peak_23586_lociStitched	Promoter (<=1kb)	2	201980877	202004600	23724	1	8837	uc002uwy.3	0	ENSG00000003402	CFLAR	CASP8 and FADD like apoptosis regulator	uc002uwy.3;uc002uwz.3;uc002uxb.4;uc002uxc.4;uc010zhk.2;uc010zhl.2;uc010fsw.3;uc002uxd.4;uc002uxe.2;uc021vuw.1;uc002uxf.3;uc010fsx.3;uc010fsy.3;uc010zhm.2;uc010fsz.3	8837;8837;8837;8837;8837;8837;8837;8837;8837;8837;8837;8837;8837;8837;8837	0;0;0;0;0;0;0;0;0;0;0;0;0;0;0	22924.9	typicalEnhancer	24041
chr14	35834271	35890162	55892	*	9	7249	22910.1	9_GES1-WT_peak_12362_lociStitched	Promoter (<=1kb)	14	35870716	35873960	3245	2	4792	uc001wtf.4	0	ENSG00000100906	NFKBIA	NFKB inhibitor alpha	uc001wtf.4	4792	0	22910.1	typicalEnhancer	24040
chr1	203503271	203528726	25456	*	5	5280	22905.3	5_GES1-WT_peak_3594_lociStitched	Distal Intergenic	1	203463271	203478077	14807	1	26254	uc001gzu.1	40000	ENSG00000188770	OPTC	opticin	NA	NA	NA	22905.3	typicalEnhancer	24039
chr12	88692078	88704177	12100	*	3	4584	22893.2	3_GES1-WT_peak_10232_lociStitched	Distal Intergenic	12	88536073	88593664	57592	1	160418	uc001tau.3	156005	ENSG00000139324	TMTC3	transmembrane O-mannosyltransferase targeting cadherins 3	NA	NA	NA	22893.2	typicalEnhancer	24038
chrX	125784147	125793285	9139	*	4	3646	22885.9	4_GES1-WT_peak_44032_lociStitched	Distal Intergenic	23	125683366	125686842	3477	2	139170	uc004eul.3	-97305	ENSG00000198889	DCAF12L1	DDB1 and CUL4 associated factor 12 like 1	NA	NA	NA	22885.9	typicalEnhancer	24037
chr7	30027109	30036080	8972	*	2	3309	22852.6	2_GES1-WT_peak_37292_lociStitched	Promoter (<=1kb)	7	29959719	30029425	69707	2	9805	uc003tak.3	0	ENSG00000136193	SCRN1	secernin 1	uc003tak.3;uc011jzy.2;uc011jzz.2;uc011kaa.2	9805;9805;9805;9805	0;0;0;0	22852.6	typicalEnhancer	24036
chr3	150125266	150132796	7531	*	2	3561	22818.2	2_GES1-WT_peak_28932_lociStitched	Promoter (<=1kb)	3	150126788	150177615	50828	1	9819	uc003exv.3	0	ENSG00000196428	TSC22D2	TSC22 domain family member 2	uc003exv.3;uc003exw.3;uc003exx.3	9819;9819;9819	0;0;0	22818.2	typicalEnhancer	24035
chr16	88268125	88279686	11562	*	6	3426	22814.1	6_GES1-WT_peak_16347_lociStitched	Distal Intergenic	16	88493879	88507165	13287	1	84627	uc002fku.2	-214193	ENSG00000225614	ZNF469	zinc finger protein 469	NA	NA	NA	22814.1	typicalEnhancer	24034
chr7	32181690	32184205	2516	*	1	2517	22808.3	1_GES1-WT_peak_37341_lociStitched	Intron (uc003tco.2/5137, intron 3 of 18)	7	31829247	32111045	281799	2	5137	uc003tcs.3	-70645	ENSG00000154678	PDE1C	phosphodiesterase 1C	uc003tco.2	5137	0	22808.3	typicalEnhancer	24033
chr11	100746724	100762533	15810	*	2	3699	22805.9	2_GES1-WT_peak_8270_lociStitched	Intron (uc001pge.2/143872, intron 4 of 23)	11	100830581	100844065	13485	1	143872	uc001pgc.2	-68048	ENSG00000165895	ARHGAP42	Rho GTPase activating protein 42	uc001pge.2	143872	0	22805.9	typicalEnhancer	24032
chr17	40554589	40580350	25762	*	5	4546	22753	5_GES1-WT_peak_17319_lociStitched	Promoter (<=1kb)	17	40554467	40575273	20807	2	284119	uc010wgi.2	0	ENSG00000177469	CAVIN1	caveolae associated protein 1	uc010wgi.2;uc002hzo.3	284119;284119	0;0	22753	typicalEnhancer	24031
chr2	40559098	40599252	40155	*	7	5750	22743.8	7_GES1-WT_peak_21502_lociStitched	Intron (uc002rrx.3/6546, intron 1 of 9)	2	40339286	40657444	318159	2	6546	uc002rrx.3	58192	ENSG00000183023	SLC8A1	solute carrier family 8 member A1	uc002rrx.3;uc002rry.3;uc002rrz.3;uc002rsb.2;uc002rsa.3;uc002rsd.4	6546;6546;6546;6546;6546;6546	0;0;0;0;0;0	22743.8	typicalEnhancer	24030
chr9	90798380	90814049	15670	*	3	3062	22732.5	3_GES1-WT_peak_41831_lociStitched	Distal Intergenic	9	90744220	90749900	5681	2	645961	uc011lti.2	-48480	ENSG00000177910	SPATA31C2	SPATA31 subfamily C member 2	NA	NA	NA	22732.5	typicalEnhancer	24029
chr8	38239268	38264807	25540	*	5	5635	22705.1	5_GES1-WT_peak_39669_lociStitched	Promoter (<=1kb)	8	38243959	38251951	7993	1	137994	uc003xlk.3	0	ENSG00000165046	LETM2	leucine zipper and EF-hand containing transmembrane protein 2	uc003xlk.3;uc011lbn.2;uc003xll.2;uc003xlm.2;uc003xln.2;uc003xlo.2;uc010lwf.3;uc011lbu.2;uc011lbv.2;uc011lbw.2;uc003xlp.3;uc010lwk.3;uc022aua.1;uc022aub.1;uc022auc.1;uc022aud.1;uc003xli.3;uc010lwe.3;uc011lbm.2;uc003xlj.3	137994;137994;137994;137994;137994;137994;2260;2260;2260;2260;2260;2260;2260;2260;2260;2260;54904;54904;54904;54904	0;0;0;0;0;0;11084;0;0;0;0;0;0;0;0;0;0;0;0;0	22705.1	typicalEnhancer	24028
chr1	207406143	207418291	12149	*	5	3301	22695.5	5_GES1-WT_peak_3737_lociStitched	Distal Intergenic	1	207494817	207534311	39495	1	1604	uc001hfq.4	-76526	ENSG00000196352	CD55	CD55 molecule (Cromer blood group)	NA	NA	NA	22695.5	typicalEnhancer	24027
chr1	145209109	145220250	11142	*	3	3171	22694	3_GES1-WT_peak_2579_lociStitched	Promoter (<=1kb)	1	145209111	145304652	95542	1	100132406	uc021ouk.1	0	ENSG00000271425	NBPF10	NBPF member 10	uc021ouk.1;uc021ott.2;uc021ots.1;uc001emm.4;uc001emn.4;uc001emo.2;uc010oyh.1;uc031pob.1;uc010oye.3;uc031pnx.1	100132406;100288142;100288142;388677;388677;388677;388677;388677;400818;400818	0;0;0;0;0;0;0;-4347;0;0	22694	typicalEnhancer	24026
chr1	44286836	44302114	15279	*	2	4330	22684.7	2_GES1-WT_peak_1288_lociStitched	Exon (uc001ckb.4/6487, exon 5 of 13)	1	44201904	44396837	194934	1	6487	uc001ckl.4	84932	ENSG00000126091	ST3GAL3	ST3 beta-galactoside alpha-2,3-sialyltransferase 3	uc009vwu.1;uc010okj.2;uc001cjz.4;uc001cka.4;uc001ckb.4;uc001ckc.4;uc001ckd.4;uc001cke.4;uc001ckf.4;uc001ckg.4;uc001ckh.4;uc001cki.4;uc001ckj.4;uc001ckk.4;uc001ckm.4;uc001ckn.4;uc001cko.4;uc001ckp.4;uc001ckq.4;uc001ckr.4;uc009vwv.4;uc009vww.4;uc009vwx.4;uc009vwy.4;uc009vwz.4;uc009vxa.4;uc009vxb.4;uc001ckl.4	6487;6487;6487;6487;6487;6487;6487;6487;6487;6487;6487;6487;6487;6487;6487;6487;6487;6487;6487;6487;6487;6487;6487;6487;6487;6487;6487;6487	0;0;0;0;0;0;0;0;0;0;0;0;0;0;0;0;0;0;0;0;0;0;0;0;0;0;0;0	22684.7	typicalEnhancer	24025
chr3	152847878	152863612	15735	*	3	6188	22663.1	3_GES1-WT_peak_28985_lociStitched	Distal Intergenic	3	152880029	152886263	6235	1	5912	uc003ezr.3	-16417	ENSG00000181467	RAP2B	RAP2B, member of RAS oncogene family	NA	NA	NA	22663.1	typicalEnhancer	24024
chr6	100379902	100382571	2670	*	1	2671	22634.9	1_GES1-WT_peak_35741_lociStitched	Exon (uc003pqh.1/84539, exon 5 of 6)	6	100441914	100524295	82382	1	728012	uc021zdf.1	-59343	ENSG00000229315	MCHR2-AS1	MCHR2 antisense RNA 1	uc003pqh.1;uc003pqi.1	84539;84539	0;0	22634.9	typicalEnhancer	24023
chr15	67121657	67156004	34348	*	5	6053	22614.7	5_GES1-WT_peak_14194_lociStitched	Exon (uc002aqh.1/uc002aqh.1, exon 1 of 1)	15	67000930	67074337	73408	1	4091	uc002aqg.3	120727	ENSG00000137834	SMAD6	SMAD family member 6	NA	NA	NA	22614.7	typicalEnhancer	24022
chr7	6414121	6439447	25327	*	6	5528	22611.9	6_GES1-WT_peak_36896_lociStitched	Promoter (<=1kb)	7	6414126	6443598	29473	1	5879	uc003spw.3	0	ENSG00000136238	RAC1	Rac family small GTPase 1	uc003spw.3;uc003spx.3;uc021zzg.1	5879;5879;5879	0;0;0	22611.9	typicalEnhancer	24021
chr10	35701267	35723102	21836	*	3	4844	22580.6	3_GES1-WT_peak_5166_lociStitched	Intron (uc001iyu.4/219771, intron 3 of 11)	10	35625802	35860847	235046	1	219771	uc010qet.2	75465	ENSG00000108100	CCNY	cyclin Y	uc001iyu.4;uc001iyv.4;uc001iyw.4;uc001iyx.4;uc009xmb.3;uc010qet.2	219771;219771;219771;219771;219771;219771	0;0;0;0;0;0	22580.6	typicalEnhancer	24020
chr18	987418	1016408	28991	*	4	6107	22575.3	4_GES1-WT_peak_18365_lociStitched	Distal Intergenic	18	905197	912173	6977	1	116	uc010dkh.4	82221	ENSG00000141433	ADCYAP1	adenylate cyclase activating polypeptide 1	NA	NA	NA	22575.3	typicalEnhancer	24019
chr16	68269575	68299609	30035	*	5	5727	22568.3	5_GES1-WT_peak_15939_lociStitched	Promoter (<=1kb)	16	68279247	68294961	15715	1	23659	uc002evr.3	0	ENSG00000103066	PLA2G15	phospholipase A2 group XV	uc002evr.3;uc010vld.2;uc010vle.2;uc010vlf.2;uc002evs.3;uc002evp.1;uc002evq.1;uc010cfa.1;uc010cfb.2;uc002evv.2;uc002evt.2;uc002evu.2	23659;23659;23659;23659;23659;80004;80004;80004;9057;9057;9057;9057	0;0;0;0;0;-2843;0;0;0;0;0;0	22568.3	typicalEnhancer	24018
chr10	34814741	34825756	11016	*	4	3591	22548.7	4_GES1-WT_peak_5132_lociStitched	Intron (uc010qej.2/56288, intron 2 of 24)	10	34606035	34885385	279351	2	56288	uc001ixt.1	59629	ENSG00000148498	PARD3	par-3 family cell polarity regulator	uc010qej.2;uc010qek.2;uc010qel.2;uc010qem.2;uc010qen.2;uc010qeo.2;uc010qep.2;uc010qeq.2;uc001ixp.2;uc001ixq.2;uc001ixr.2;uc001ixt.1;uc001ixu.2	56288;56288;56288;56288;56288;56288;56288;56288;56288;56288;56288;56288;56288	0;0;0;0;0;0;0;0;0;0;0;0;0	22548.7	typicalEnhancer	24017
chr20	35463572	35492382	28811	*	4	6283	22538.8	4_GES1-WT_peak_24945_lociStitched	Promoter (<=1kb)	20	35405845	35488276	82432	2	140710	uc002xgd.1	0	ENSG00000149639	SOGA1	suppressor of glucose, autophagy associated 1	uc002xgd.1;uc021wcx.1	140710;140710	0;0	22538.8	typicalEnhancer	24016
chr1	52023081	52036491	13411	*	4	4258	22534.5	4_GES1-WT_peak_1378_lociStitched	Distal Intergenic	1	52042851	52254891	212041	1	114883	uc001css.4	-6360	ENSG00000117859	OSBPL9	oxysterol binding protein like 9	NA	NA	NA	22534.5	typicalEnhancer	24015
chr5	5334714	5352295	17582	*	7	6065	22476.8	7_GES1-WT_peak_31632_lociStitched	Distal Intergenic	5	5422786	5490347	67562	1	23379	uc003jdm.5	-70491	ENSG00000164151	ICE1	interactor of little elongation complex ELL subunit 1	NA	NA	NA	22476.8	typicalEnhancer	24014
chr1	214723937	214755884	31948	*	6	4592	22459.4	6_GES1-WT_peak_3902_lociStitched	Promoter (<=1kb)	1	214522039	214725024	202986	2	5784	uc001hkk.2	0	ENSG00000152104	PTPN14	protein tyrosine phosphatase non-receptor type 14	uc001hkk.2;uc010pty.2;uc001hkl.2	5784;5784;5784	0;0;0	22459.4	typicalEnhancer	24013
chr16	57219212	57229430	10219	*	2	4456	22459.3	2_GES1-WT_peak_15763_lociStitched	Promoter (<=1kb)	16	57186378	57219976	33599	2	80011	uc021tiy.1	0	ENSG00000172775	PSME3IP1	proteasome activator subunit 3 interacting protein 1	uc021tiy.1;uc002elb.3;uc002elc.3;uc002eld.3;uc002ele.1	80011;89970;89970;89970;89970	0;0;0;0;0	22459.3	typicalEnhancer	24012
chr2	233229953	233255266	25314	*	4	4800	22458.6	4_GES1-WT_peak_24146_lociStitched	Promoter (<=1kb)	2	233243348	233247599	4252	1	250	uc002vsq.3	0	ENSG00000163283	ALPP	alkaline phosphatase, placental	uc002vsq.3;uc021vyg.2	250;347694	0;0	22458.6	typicalEnhancer	24011
chr14	102430980	102447954	16975	*	3	5127	22427.4	3_GES1-WT_peak_13368_lociStitched	Promoter (<=1kb)	14	102430865	102517135	86271	1	1778	uc001yks.2	115	ENSG00000197102	DYNC1H1	dynein cytoplasmic 1 heavy chain 1	uc001yks.2	1778	0	22427.4	typicalEnhancer	24010
chr1	65886401	65902218	15818	*	6	3638	22418.9	6_GES1-WT_peak_1621_lociStitched	Promoter (<=1kb)	1	65886131	65901690	15560	1	54741	uc009wap.3	270	ENSG00000213625	LEPROT	leptin receptor overlapping transcript	uc001dcg.3;uc001dch.3;uc001dci.3;uc009waq.3;uc009wao.3;uc001dcf.3;uc009wap.3;uc001dcd.2;uc010opc.2;uc001dce.2	3953;3953;3953;3953;54741;54741;54741;9829;9829;9829	0;0;0;0;0;0;0;0;0;0	22418.9	typicalEnhancer	24009
chr5	135388717	135395440	6724	*	3	3506	22403	3_GES1-WT_peak_33319_lociStitched	Promoter (1-2kb)	5	135397189	135399507	2319	1	7045	uc010jee.3	-1749	ENSG00000120708	TGFBI	transforming growth factor beta induced	uc003lbf.4;uc003lbg.4;uc003lbh.4;uc011cyb.2;uc010jee.3	7045;7045;7045;7045;7045	0;0;0;0;-1749	22403	typicalEnhancer	24008
chr20	33849468	33852251	2784	*	2	2333	22383.6	2_GES1-WT_peak_24888_lociStitched	Exon (uc002xbu.2/10893, exon 5 of 9)	20	33864136	33865960	1825	2	101410538	uc031rsv.1	13709	ENSG00000126005	MMP24OS	MMP24 opposite strand	uc002xbu.2;uc010zuv.2	10893;55741	0;0	22383.6	typicalEnhancer	24007
chr7	17410138	17412671	2534	*	1	2535	22358.5	1_GES1-WT_peak_37034_lociStitched	Distal Intergenic	7	17338276	17385775	47500	1	196	uc011jxz.1	71862	ENSG00000106546	AHR	aryl hydrocarbon receptor	NA	NA	NA	22358.5	typicalEnhancer	24006
chr9	132077604	132097933	20330	*	3	3494	22338.6	3_GES1-WT_peak_42718_lociStitched	Promoter (<=1kb)	9	132083295	132084882	1588	1	414318	uc004bxs.2	0	NA	LINC02913	long intergenic non-protein coding RNA 2913	uc004bxs.2	414318	0	22338.6	typicalEnhancer	24005
chr19	43553540	43566230	12691	*	3	3473	22324.7	3_GES1-WT_peak_20385_lociStitched	Intron (uc010xwk.2/5675, intron 1 of 3)	19	43568362	43586893	18532	2	5670	uc002ovr.3	20663	ENSG00000242221	PSG2	pregnancy specific beta-1-glycoprotein 2	uc002ovr.3;uc010xwk.2	5670;5675	0;0	22324.7	typicalEnhancer	24004
chr5	136635969	136647287	11319	*	2	3112	22317.7	2_GES1-WT_peak_33337_lociStitched	Intron (uc003lbo.3/6695, intron 1 of 9)	5	136310987	136834438	523452	2	6695	uc003lbo.3	187151	ENSG00000152377	SPOCK1	SPARC (osteonectin), cwcv and kazal like domains proteoglycan 1	uc003lbo.3;uc003lbp.3	6695;6695	0;0	22317.7	typicalEnhancer	24003
chr10	54202130	54212755	10626	*	2	4333	22316.7	2_GES1-WT_peak_5370_lociStitched	Exon (uc001jjs.3/uc001jjs.3, exon 3 of 3)	10	54074041	54077417	3377	1	22943	uc001jjr.3	128089	ENSG00000107984	DKK1	dickkopf WNT signaling pathway inhibitor 1	NA	NA	NA	22316.7	typicalEnhancer	24002
chr7	92250591	92272115	21525	*	3	4959	22308.5	3_GES1-WT_peak_38174_lociStitched	Exon (uc011khw.2/1021, exon 6 of 8)	7	92190072	92219706	29635	2	257415	uc022ahf.1	-30885	ENSG00000234545	FAM133B	family with sequence similarity 133 member B	uc011khw.2;uc010lez.3	1021;1021	0;0	22308.5	typicalEnhancer	24001
chr18	12729255	12750433	21179	*	5	5201	22288.8	5_GES1-WT_peak_18584_lociStitched	Distal Intergenic	18	12702987	12725739	22753	1	56984	uc002krk.3	26268	ENSG00000128789	PSMG2	proteasome assembly chaperone 2	uc002krg.3;uc002krj.2;uc002krk.3	56984;56984;56984	0;0;0	22288.8	typicalEnhancer	24000
chr9	121402649	121415103	12455	*	3	4155	22275.8	3_GES1-WT_peak_42445_lociStitched	Distal Intergenic	9	121928908	122131739	202832	2	1620	uc004bkc.2	716636	ENSG00000078725	BRINP1	BMP/retinoic acid inducible neural specific 1	NA	NA	NA	22275.8	typicalEnhancer	23999
chr3	76536153	76550882	14730	*	5	4346	22246.7	5_GES1-WT_peak_27959_lociStitched	Intron (uc021xat.1/6092, intron 1 of 25)	3	77089294	77699114	609821	1	6092	uc003dpy.4	-538412	ENSG00000185008	ROBO2	roundabout guidance receptor 2	uc021xat.1	6092	0	22246.7	typicalEnhancer	23998
chr1	205141488	205145989	4502	*	3	2688	22240.3	3_GES1-WT_peak_3658_lociStitched	Promoter (<=1kb)	1	205129134	205143643	14510	2	25778	uc001hby.1	0	ENSG00000133059	DSTYK	dual serine/threonine and tyrosine protein kinase	uc001hbw.3;uc001hbx.3;uc001hby.1	25778;25778;25778	0;0;0	22240.3	typicalEnhancer	23997
chr14	105144128	105156901	12774	*	3	5646	22230.6	3_GES1-WT_peak_13430_lociStitched	Promoter (<=1kb)	14	105155943	105171145	15203	1	64423	uc001yoy.4	0	ENSG00000203485	INF2	inverted formin 2	uc021sek.1;uc001yoy.4;uc001ypb.2;uc001ypc.2	100616300;64423;64423;64423	-42;0;0;0	22230.6	typicalEnhancer	23996
chr2	20778038	20793898	15861	*	4	4509	22229.2	4_GES1-WT_peak_21146_lociStitched	Distal Intergenic	2	20817564	20850864	33301	2	64342	uc002rdw.1	56966	ENSG00000118960	HS1BP3	HCLS1 binding protein 3	NA	NA	NA	22229.2	typicalEnhancer	23995
chr4	174089421	174113374	23954	*	5	5807	22188.6	5_GES1-WT_peak_31356_lociStitched	Promoter (<=1kb)	4	174089904	174245118	155215	1	51809	uc003isz.4	0	ENSG00000109586	GALNT7	polypeptide N-acetylgalactosaminyltransferase 7	uc003isz.4	51809	0	22188.6	typicalEnhancer	23994
chr12	76370881	76373746	2866	*	1	2867	22179.1	1_GES1-WT_peak_10103_lociStitched	Distal Intergenic	12	76419227	76425556	6330	2	22822	uc001sxu.3	51810	ENSG00000139289	PHLDA1	pleckstrin homology like domain family A member 1	NA	NA	NA	22179.1	typicalEnhancer	23993
chr4	184019345	184051702	32358	*	6	5303	22174.9	6_GES1-WT_peak_31467_lociStitched	Promoter (<=1kb)	4	184018174	184020352	2179	2	152641	uc003ivj.1	0	ENSG00000251359	WWC2-AS2	WWC2 antisense RNA 2	uc003ivj.1;uc010irx.3	152641;80014	0;0	22174.9	typicalEnhancer	23992
chr5	80921808	80936468	14661	*	2	3441	22148.4	2_GES1-WT_peak_32693_lociStitched	Exon (uc003kho.4/23635, exon 3 of 17)	5	80713179	81047072	333894	2	23635	uc003kho.4	110604	ENSG00000145687	SSBP2	single stranded DNA binding protein 2	uc003kho.4;uc003khp.4;uc011ctp.3;uc011ctq.3;uc011ctr.3;uc031skm.1	23635;23635;23635;23635;23635;23635	0;0;0;0;0;0	22148.4	typicalEnhancer	23991
chr14	105553370	105560177	6808	*	2	3204	22112.4	2_GES1-WT_peak_13447_lociStitched	Distal Intergenic	14	105521724	105531754	10031	2	29933	uc010axe.1	-21616	ENSG00000183484	GPR132	G protein-coupled receptor 132	NA	NA	NA	22112.4	typicalEnhancer	23990
chr1	33207144	33254992	47849	*	6	6328	22111	6_GES1-WT_peak_1020_lociStitched	Promoter (<=1kb)	1	33207512	33240571	33060	1	57648	uc001bvu.1	0	ENSG00000162522	KIAA1522	KIAA1522	uc001bvu.1;uc010ohm.1;uc001bvv.2;uc010ohn.1;uc001bvw.1;uc001bvx.1;uc001bvy.1	57648;57648;57648;57648;8565;8565;8565	0;0;0;0;0;0;0	22111	typicalEnhancer	23989
chr5	131825728	131846627	20900	*	5	5921	22110.1	5_GES1-WT_peak_33232_lociStitched	Promoter (<=1kb)	5	131776132	131826465	50334	2	3659	uc003kxd.2	0	ENSG00000125347	IRF1	interferon regulatory factor 1	uc003kxd.2;uc003kxa.2;uc003kxb.2;uc010jdt.2;uc010jds.2	3659;3659;3659;3659;441108	0;0;0;-553;0	22110.1	typicalEnhancer	23988
chr19	45244280	45258339	14060	*	4	4819	22102.3	4_GES1-WT_peak_20473_lociStitched	Promoter (<=1kb)	19	45251978	45263301	11324	1	602	uc010xxe.2	0	ENSG00000069399	BCL3	BCL3 transcription coactivator	uc010xxe.2	602	0	22102.3	typicalEnhancer	23987
chr8	90111887	90114026	2140	*	1	2141	22101.5	1_GES1-WT_peak_40123_lociStitched	Distal Intergenic	8	90769975	90803292	33318	1	8767	uc003yee.3	-655949	ENSG00000104312	RIPK2	receptor interacting serine/threonine kinase 2	NA	NA	NA	22101.5	typicalEnhancer	23986
chr8	32775144	32783885	8742	*	2	3824	22095.4	2_GES1-WT_peak_39599_lociStitched	Distal Intergenic	8	32585467	32622558	37092	1	3084	uc003xja.2	189677	ENSG00000157168	NRG1	neuregulin 1	NA	NA	NA	22095.4	typicalEnhancer	23985
chr2	56806365	56810530	4166	*	4	2683	22071.1	4_GES1-WT_peak_21797_lociStitched	Distal Intergenic	2	56411258	56613309	202052	1	114800	uc002rzn.3	395107	ENSG00000055813	CCDC85A	coiled-coil domain containing 85A	NA	NA	NA	22071.1	typicalEnhancer	23984
chr8	128960711	128962977	2267	*	1	2268	22069	1_GES1-WT_peak_40658_lociStitched	5' UTR	8	128972879	128972941	63	1	100302161	uc022bbg.1	-9902	ENSG00000221771	MIR1205	microRNA 1205	uc003ysl.3	5820	0	22069	typicalEnhancer	23983
chr2	237676850	237686453	9604	*	3	3726	22066.2	3_GES1-WT_peak_24256_lociStitched	Distal Intergenic	2	237478380	237490994	12615	1	57007	uc002vwd.3	198470	ENSG00000144476	ACKR3	atypical chemokine receptor 3	NA	NA	NA	22066.2	typicalEnhancer	23982
chr7	36427075	36433196	6122	*	3	2228	22041	3_GES1-WT_peak_37425_lociStitched	Promoter (<=1kb)	7	36363759	36429734	65976	2	23366	uc003tfd.2	0	ENSG00000164542	KIAA0895	KIAA0895	uc003tfd.2;uc003tff.3;uc003tfg.3;uc010kxe.3;uc011kaz.2	23366;54443;54443;54443;54443	0;0;0;0;0	22041	typicalEnhancer	23981
chr7	130522935	130539634	16700	*	4	4896	22020.6	4_GES1-WT_peak_38733_lociStitched	Distal Intergenic	7	130561506	130561569	64	2	407021	uc011kpj.2	21935	ENSG00000284032	MIR29A	microRNA 29a	NA	NA	NA	22020.6	typicalEnhancer	23980
chr10	33239516	33251921	12406	*	3	3488	21987.2	3_GES1-WT_peak_5098_lociStitched	Promoter (<=1kb)	10	33189246	33246822	57577	2	3688	uc001iws.4	0	ENSG00000150093	ITGB1	integrin subunit beta 1	uc001iws.4;uc001iwt.4	3688;3688	0;0	21987.2	typicalEnhancer	23979
chr9	137552958	137573325	20368	*	3	4839	21985.2	3_GES1-WT_peak_42897_lociStitched	Intron (uc004cfe.4/1289, intron 1 of 65)	9	137533651	137736688	203038	1	1289	uc031tfl.1	19307	ENSG00000130635	COL5A1	collagen type V alpha 1 chain	uc004cfe.4;uc031tfl.1	1289;1289	0;0	21985.2	typicalEnhancer	23978
chr14	103574836	103611110	36275	*	8	8152	21975.4	8_GES1-WT_peak_13403_lociStitched	Promoter (<=1kb)	14	103592664	103603776	11113	1	7127	uc001ymm.1	0	ENSG00000185215	TNFAIP2	TNF alpha induced protein 2	uc001ymm.1;uc010awo.1;uc010txz.1;uc010tya.1;uc001ymk.3	7127;7127;7127;7127;91828	0;0;0;0;0	21975.4	typicalEnhancer	23977
chr11	46258517	46271315	12799	*	3	3953	21961.8	3_GES1-WT_peak_7376_lociStitched	Distal Intergenic	11	46299228	46342296	43069	1	90993	uc021qik.1	-27913	ENSG00000157613	CREB3L1	cAMP responsive element binding protein 3 like 1	NA	NA	NA	21961.8	typicalEnhancer	23976
chr6	144584995	144587439	2445	*	1	2446	21896.4	1_GES1-WT_peak_36374_lociStitched	Distal Intergenic	6	144607490	144801118	193629	1	7402	uc010khq.1	-20051	ENSG00000152818	UTRN	utrophin	NA	NA	NA	21896.4	typicalEnhancer	23975
chr10	102791692	102827741	36050	*	5	5200	21860.7	5_GES1-WT_peak_6229_lociStitched	Promoter (<=1kb)	10	102820999	102825351	4353	1	81621	uc001ksr.3	0	ENSG00000107821	KAZALD1	Kazal type serine peptidase inhibitor domain 1	uc021pxc.1;uc001ksn.3;uc001kso.2;uc001ksr.3;uc001kss.4;uc001kst.1;uc001ksp.3;uc010qpx.2	79955;79955;79955;81621;81621;81621;81855;81855	-778;-778;-778;0;0;0;0;0	21860.7	typicalEnhancer	23974
chr9	12812597	12815660	3064	*	2	2680	21824.6	2_GES1-WT_peak_41023_lociStitched	Intron (uc003zkw.3/286343, intron 1 of 1)	9	12775012	12823059	48048	1	286343	uc003zkw.3	37585	ENSG00000153714	LURAP1L	leucine rich adaptor protein 1 like	uc003zkw.3	286343	0	21824.6	typicalEnhancer	23973
chr9	79268461	79292963	24503	*	4	5574	21819.9	4_GES1-WT_peak_41627_lociStitched	Exon (uc011lsk.2/158471, exon 3 of 12)	9	79226292	79307113	80822	2	158471	uc011lsk.2	14150	ENSG00000106772	PRUNE2	prune homolog 2 with BCH domain	uc011lsk.2;uc011lsl.2;uc011lsm.2;uc004akj.4;uc022big.1;uc010mpk.3;uc010mpl.1	158471;158471;158471;158471;158471;158471;158471	0;0;0;0;0;0;0	21819.9	typicalEnhancer	23972
chr4	165124145	165134041	9897	*	4	3313	21814	4_GES1-WT_peak_31241_lociStitched	Intron (uc003iqs.2/55016, intron 1 of 7)	4	165118159	165118863	705	2	23520	uc011cjk.2	-5282	ENSG00000248546	ANP32C	acidic nuclear phosphoprotein 32 family member C	uc003iqs.2	55016	0	21814	typicalEnhancer	23971
chr9	21993236	22009257	16022	*	4	4422	21812.4	4_GES1-WT_peak_41149_lociStitched	Promoter (<=1kb)	9	21994790	22077889	83100	1	100048912	uc010miw.1	0	ENSG00000240498	CDKN2B-AS1	CDKN2B antisense RNA 1	uc010miw.1;uc010mix.1;uc022bed.1;uc022bee.1;uc022bef.1;uc003zpm.3;uc022beg.1;uc022beh.1;uc022bei.1;uc022bej.1;uc022bek.1;uc022bel.1;uc022bem.1;uc022ben.1;uc003zpl.3;uc003zpn.3;uc003zpo.3;uc003zpi.1	100048912;100048912;100048912;100048912;100048912;100048912;100048912;100048912;100048912;100048912;100048912;100048912;100048912;100048912;1029;1030;1030;4507	0;0;0;0;0;0;0;0;0;0;0;0;0;0;0;0;0;0	21812.4	typicalEnhancer	23970
chr1	115598652	115612986	14335	*	4	5125	21802.1	4_GES1-WT_peak_2373_lociStitched	Exon (uc001eft.3/10100, exon 3 of 8)	1	115590633	115632121	41489	2	10100	uc001eft.3	19135	ENSG00000134198	TSPAN2	tetraspanin 2	uc001eft.3;uc021osc.1	10100;10100	0;0	21802.1	typicalEnhancer	23969
chr6	150724232	150734131	9900	*	4	3809	21789.9	4_GES1-WT_peak_36468_lociStitched	3' UTR	6	150690028	150725765	35738	1	389434	uc010kik.2	34204	ENSG00000009765	IYD	iodotyrosine deiodinase	uc003qnu.2;uc003qnv.2;uc003qnw.2;uc003qnx.2;uc010kik.2	389434;389434;389434;389434;389434	0;0;0;0;0	21789.9	typicalEnhancer	23968
chr1	17215552	17241053	25502	*	4	2453	21753.2	4_GES1-WT_peak_560_lociStitched	Exon (uc021ohh.1/uc021ohh.1, exon 1 of 1)	1	17248445	17299474	51030	1	9696	uc001azt.2	-7392	ENSG00000058453	CROCC	ciliary rootlet coiled-coil, rootletin	uc009voy.1	9696	0	21753.2	typicalEnhancer	23967
chr10	82258113	82269435	11323	*	3	3611	21742.4	3_GES1-WT_peak_5884_lociStitched	Exon (uc001kci.4/81619, exon 3 of 8)	10	82297658	82406316	108659	1	387694	uc001kck.1	-28223	ENSG00000178217	SH2D4B	SH2 domain containing 4B	uc001kci.4;uc001kcj.4;uc009xss.3	81619;81619;81619	0;0;0	21742.4	typicalEnhancer	23966
chr4	41506802	41510535	3734	*	3	2745	21735.2	3_GES1-WT_peak_30118_lociStitched	Intron (uc003gvt.1/22998, intron 1 of 6)	4	41540191	41702061	161871	1	22998	uc003gvz.4	-29656	ENSG00000064042	LIMCH1	LIM and calponin homology domains 1	uc003gvt.1;uc003gvu.4;uc003gvv.4;uc003gvw.4;uc003gvx.4;uc003gwe.4;uc003gvy.4	22998;22998;22998;22998;22998;22998;22998	0;0;0;0;0;0;0	21735.2	typicalEnhancer	23965
chr20	42831939	42839422	7484	*	2	2798	21731.3	2_GES1-WT_peak_25034_lociStitched	Promoter (<=1kb)	20	42824581	42839546	14966	2	51526	uc002xlk.3	124	ENSG00000132823	OSER1	oxidative stress responsive serine rich 1	uc002xll.3;uc002xlm.3;uc021wec.1;uc002xln.3;uc002xlk.3	100505783;100505783;100505783;100505783;51526	-178;-300;-300;-304;0	21731.3	typicalEnhancer	23964
chr7	46494823	46497467	2645	*	1	2646	21730.8	1_GES1-WT_peak_37604_lociStitched	Distal Intergenic	7	45951844	45960871	9028	2	3486	uc003tnt.3	-533952	ENSG00000146674	IGFBP3	insulin like growth factor binding protein 3	NA	NA	NA	21730.8	typicalEnhancer	23963
chr2	145695725	145703049	7325	*	4	2919	21715.7	4_GES1-WT_peak_22827_lociStitched	Intron (uc021vqn.2/401014, intron 2 of 3)	2	145425534	145834291	408758	1	401014	uc031rpo.1	270191	ENSG00000226674	TEX41	testis expressed 41	uc021vqn.2;uc031rpo.1	401014;401014	0;0	21715.7	typicalEnhancer	23962
chr6	9646552	9659113	12562	*	2	4438	21695.8	2_GES1-WT_peak_34362_lociStitched	Distal Intergenic	6	10412551	10416402	3852	1	100130275	uc003myw.3	-753438	NA	TFAP2A-AS1	TFAP2A antisense RNA 1	NA	NA	NA	21695.8	typicalEnhancer	23961
chr10	78044112	78070893	26782	*	7	5119	21690.7	7_GES1-WT_peak_5773_lociStitched	Intron (uc001jxi.3/83938, intron 4 of 5)	10	77542519	78317126	774608	1	83938	uc001jxi.3	501593	ENSG00000148655	LRMDA	leucine rich melanocyte differentiation associated	uc001jxi.3	83938	0	21690.7	typicalEnhancer	23960
chr7	6474968	6494115	19148	*	4	3833	21683.2	4_GES1-WT_peak_36904_lociStitched	Promoter (<=1kb)	7	6448747	6487643	38897	2	221955	uc003sqa.3	0	ENSG00000164535	DAGLB	diacylglycerol lipase beta	uc011jwt.2;uc003sqa.3;uc003sqb.3;uc003sqc.3;uc011jwu.2;uc011jwv.2;uc003sqd.4;uc011jww.1	221955;221955;221955;221955;221955;221955;221955;221955	-370;0;0;0;0;0;0;0	21683.2	typicalEnhancer	23959
chr19	40926763	40950630	23868	*	5	5180	21669.8	5_GES1-WT_peak_20279_lociStitched	Promoter (<=1kb)	19	40946748	40948505	1758	2	29946	uc002onu.4	0	ENSG00000167565	SERTAD3	SERTA domain containing 3	uc002onu.4;uc002onv.4;uc002ont.4;uc002onw.2	29946;29946;29950;645	0;0;0;0	21669.8	typicalEnhancer	23958
chr12	69893650	69929067	35418	*	7	7159	21665.2	7_GES1-WT_peak_10050_lociStitched	5' UTR	12	69864129	69973562	109434	1	10818	uc009zrk.3	29521	ENSG00000166225	FRS2	fibroblast growth factor receptor substrate 2	uc001suy.3;uc001suz.3;uc009zrj.3;uc009zrk.3	10818;10818;10818;10818	0;0;0;0	21665.2	typicalEnhancer	23957
chr20	22742769	22757378	14610	*	2	4616	21665.2	2_GES1-WT_peak_24715_lociStitched	Distal Intergenic	20	22561642	22566101	4460	2	3170	uc002wsn.3	-176668	ENSG00000125798	FOXA2	forkhead box A2	NA	NA	NA	21665.2	typicalEnhancer	23956
chr1	247903565	247912109	8545	*	5	3678	21635.9	5_GES1-WT_peak_4478_lociStitched	Distal Intergenic	1	247920764	247921708	945	2	26188	uc010pza.2	9599	ENSG00000221888	OR1C1	olfactory receptor family 1 subfamily C member 1	NA	NA	NA	21635.9	typicalEnhancer	23955
chr2	160995810	160998860	3051	*	1	3052	21635.9	1_GES1-WT_peak_23021_lociStitched	Exon (uc002ubh.2/3694, exon 8 of 15)	2	160958233	161056589	98357	2	3694	uc002ubh.2	57729	ENSG00000115221	ITGB6	integrin subunit beta 6	uc002ubh.2;uc010fou.2;uc010zcq.1;uc010fov.1;uc010fow.1	3694;3694;3694;3694;3694	0;0;0;0;0	21635.9	typicalEnhancer	23954
chrX	10415630	10419743	4114	*	3	3227	21605.1	3_GES1-WT_peak_43081_lociStitched	3' UTR	23	10413350	10443201	29852	2	4281	uc004csz.4	23458	ENSG00000101871	MID1	midline 1	uc004csz.4;uc004cta.4;uc004ctb.4;uc004ctc.4;uc004ctd.4;uc004cte.4;uc004ctg.4;uc004cth.4;uc004ctk.4;uc004cti.4;uc004ctj.4;uc011mie.1	4281;4281;4281;4281;4281;4281;4281;4281;4281;4281;4281;4281	0;0;0;0;0;0;0;0;0;0;0;0	21605.1	typicalEnhancer	23953
chr10	4283834	4303253	19420	*	6	4255	21587.3	6_GES1-WT_peak_4567_lociStitched	Distal Intergenic	10	4698348	4704606	6259	1	338588	uc001ihg.3	-395095	ENSG00000225269	LINC00705	long intergenic non-protein coding RNA 705	NA	NA	NA	21587.3	typicalEnhancer	23952
chr3	44924907	44935346	10440	*	4	3823	21577.4	4_GES1-WT_peak_27505_lociStitched	5' UTR	3	44916098	44956088	39991	1	7047	uc003coc.4	8809	ENSG00000163810	TGM4	transglutaminase 4	uc003coa.2;uc003cob.3;uc003coc.4	7047;7047;7047	0;0;0	21577.4	typicalEnhancer	23951
chr1	17453744	17456379	2636	*	2	2286	21553	2_GES1-WT_peak_566_lociStitched	Distal Intergenic	1	17405526	17445948	40423	2	11240	uc001bag.1	-7796	ENSG00000117115	PADI2	peptidyl arginine deiminase 2	NA	NA	NA	21553	typicalEnhancer	23950
chr19	12888730	12917989	29260	*	6	7043	21550	6_GES1-WT_peak_19770_lociStitched	Promoter (<=1kb)	19	12917428	12924462	7035	1	10535	uc002mvg.1	0	ENSG00000104889	RNASEH2A	ribonuclease H2 subunit A	uc002mvg.1;uc002muy.2;uc002muz.2;uc002mvc.3;uc002mvd.4	10535;29911;29911;3726;7001	0;-2296;-2296;0;0	21550	typicalEnhancer	23949
chr7	115993921	116004362	10442	*	2	3452	21545	2_GES1-WT_peak_38559_lociStitched	Exon (uc003via.2/858, exon 2 of 11)	7	115929906	116146190	216285	1	858	uc003vib.2	64015	ENSG00000105971	CAV2	caveolin 2	uc010lkd.2;uc010lke.2;uc003vhv.2;uc003vhw.2;uc003vhx.2;uc010lkb.1;uc010lkc.3;uc003vhz.2;uc003via.2;uc003vib.2	857;857;858;858;858;858;858;858;858;858	0;0;0;0;0;0;0;0;0;0	21545	typicalEnhancer	23948
chr7	75920296	75933678	13383	*	4	4059	21544	4_GES1-WT_peak_37976_lociStitched	Promoter (<=1kb)	7	75931875	75933614	1740	1	3315	uc003uew.3	0	ENSG00000106211	HSPB1	heat shock protein family B (small) member 1	uc010ldi.2;uc003uet.1;uc003uew.3;uc010ldj.2	222183;222183;3315;3315	89080;8364;0;0	21544	typicalEnhancer	23947
chr2	1711357	1748704	37348	*	5	7494	21534.9	5_GES1-WT_peak_20947_lociStitched	Promoter (<=1kb)	2	1635659	1748291	112633	2	7837	uc002qxa.3	0	ENSG00000130508	PXDN	peroxidasin	uc002qxa.3;uc002qxb.1;uc002qxc.1	7837;7837;7837	0;0;0	21534.9	typicalEnhancer	23946
chr12	13339792	13377825	38034	*	10	6440	21534.9	10_GES1-WT_peak_9112_lociStitched	Promoter (<=1kb)	12	13349602	13367734	18133	1	2012	uc010shr.1	0	ENSG00000134531	EMP1	epithelial membrane protein 1	uc010shr.1;uc001rbr.3;uc009zhy.3	2012;2012;2012	0;0;0	21534.9	typicalEnhancer	23945
chr11	12051829	12066600	14772	*	3	3303	21519.8	3_GES1-WT_peak_6961_lociStitched	Distal Intergenic	11	11985938	12031316	45379	2	27122	uc010rcg.1	-20513	ENSG00000050165	DKK3	dickkopf WNT signaling pathway inhibitor 3	NA	NA	NA	21519.8	typicalEnhancer	23944
chr4	44151224	44161142	9919	*	4	3869	21494.5	4_GES1-WT_peak_30140_lociStitched	Distal Intergenic	4	44175920	44450824	274905	2	386617	uc003gwu.3	289682	ENSG00000183783	KCTD8	potassium channel tetramerization domain containing 8	NA	NA	NA	21494.5	typicalEnhancer	23943
chr1	234040554	234053226	12673	*	4	3726	21493.4	4_GES1-WT_peak_4207_lociStitched	Promoter (<=1kb)	1	234040679	234460262	419584	1	148641	uc001hvy.1	0	ENSG00000183780	SLC35F3	solute carrier family 35 member F3	uc001hvy.1	148641	0	21493.4	typicalEnhancer	23942
chr10	127887030	127916395	29366	*	5	4618	21487.1	5_GES1-WT_peak_6648_lociStitched	Intron (uc001ljk.2/8038, intron 3 of 22)	10	127702902	128077127	374226	2	8038	uc001ljk.2	160732	ENSG00000148848	ADAM12	ADAM metallopeptidase domain 12	uc001ljk.2;uc010qul.1;uc001ljl.4;uc001ljm.3;uc001ljn.3	8038;8038;8038;8038;8038	0;0;0;0;0	21487.1	typicalEnhancer	23941
chr3	99578267	99595758	17492	*	5	3816	21485.4	5_GES1-WT_peak_28089_lociStitched	Promoter (<=1kb)	3	99551988	99595046	43059	2	11259	uc010hpf.3	0	ENSG00000168386	FILIP1L	filamin A interacting protein 1 like	uc021xbq.1;uc010hpf.3;uc010hpg.3;uc003dtm.3;uc003dtn.3;uc003dto.3;uc003dtp.1;uc003dtk.2;uc003dtl.3	100313938;11259;11259;11259;11259;11259;11259;84319;84319	0;0;0;0;0;0;0;0;0	21485.4	typicalEnhancer	23940
chr2	138009930	138014360	4431	*	4	3290	21458.9	4_GES1-WT_peak_22782_lociStitched	Intron (uc010zbj.1/80731, intron 6 of 8)	2	137813990	138169604	355615	1	80731	uc002tvb.3	195940	ENSG00000144229	THSD7B	thrombospondin type 1 domain containing 7B	uc010zbj.1;uc002tva.1;uc002tvb.3	80731;80731;80731	0;0;0	21458.9	typicalEnhancer	23939
chr5	86678506	86690803	12298	*	2	4301	21457.6	2_GES1-WT_peak_32756_lociStitched	3' UTR	5	86687311	86704003	16693	2	902	uc003kiy.1	13200	ENSG00000134480	CCNH	cyclin H	uc003kiw.3;uc010jav.3;uc003kix.3;uc010jaw.3;uc011ctv.2;uc011ctw.2;uc003kiy.1;uc003kiz.1;uc003kja.3;uc003kjb.3	5921;5921;5921;5921;5921;5921;902;902;902;902	0;0;0;0;0;0;0;0;0;0	21457.6	typicalEnhancer	23938
chr9	137516373	137537329	20957	*	4	4737	21445.3	4_GES1-WT_peak_42892_lociStitched	Promoter (<=1kb)	9	137533651	137736688	203038	1	1289	uc004cfe.4	0	ENSG00000130635	COL5A1	collagen type V alpha 1 chain	uc004cfe.4;uc031tfl.1	1289;1289	0;0	21445.3	typicalEnhancer	23937
chr12	97255017	97257548	2532	*	1	2533	21443.3	1_GES1-WT_peak_10378_lociStitched	Distal Intergenic	12	97301001	97347469	46469	1	121441	uc001teu.4	-43453	ENSG00000139350	NEDD1	NEDD1 gamma-tubulin ring complex targeting factor	NA	NA	NA	21443.3	typicalEnhancer	23936
chr8	13209918	13231047	21130	*	4	5459	21442.7	4_GES1-WT_peak_39276_lociStitched	Intron (uc003wwm.2/10395, intron 4 of 17)	8	12940872	13134057	193186	2	10395	uc003wwl.1	-75861	ENSG00000164741	DLC1	DLC1 Rho GTPase activating protein	uc003wwm.2;uc003wwn.3;uc011kxy.2	10395;10395;10395	0;0;0	21442.7	typicalEnhancer	23935
chr1	178235984	178243943	7960	*	2	2685	21432.3	2_GES1-WT_peak_3224_lociStitched	Intron (uc009wxb.2/9462, intron 1 of 4)	1	178310606	178448648	138043	1	9462	uc001glr.3	-66663	ENSG00000075391	RASAL2	RAS protein activator like 2	uc009wxb.2;uc001glq.3	9462;9462	0;0	21432.3	typicalEnhancer	23934
chr8	105211376	105219351	7976	*	3	3869	21425.1	3_GES1-WT_peak_40401_lociStitched	Intron (uc003ylp.3/9699, intron 19 of 23)	8	105352024	105368917	16894	1	81501	uc003ylx.2	-132673	ENSG00000164935	DCSTAMP	dendrocyte expressed seven transmembrane protein	uc003ylp.3;uc003ylw.2;uc003ylq.3;uc003ylr.3;uc003yls.3	9699;9699;9699;9699;9699	0;0;0;0;0	21425.1	typicalEnhancer	23933
chr22	36747031	36766018	18988	*	4	3932	21422.3	4_GES1-WT_peak_26579_lociStitched	Promoter (<=1kb)	22	36721078	36761157	40080	2	4627	uc003api.1	0	ENSG00000100345	MYH9	myosin heavy chain 9	uc003apg.3;uc003api.1	4627;4627	0;0	21422.3	typicalEnhancer	23932
chr6	30640356	30658829	18474	*	5	2914	21404	5_GES1-WT_peak_34826_lociStitched	Promoter (<=1kb)	6	30655824	30658500	2677	2	11270	uc031snf.1	0	ENSG00000137404	NRM	nurim	uc031snf.1;uc003nre.4;uc031sng.1;uc031snh.1;uc031sni.1;uc031snj.1;uc031snk.1;uc003nrc.4;uc003nra.3;uc003nrb.4;uc003nqz.3;uc011dmo.2	11270;11270;11270;11270;11270;11270;11270;11270;170954;170954;8449;8449	0;0;0;0;0;0;0;0;0;0;0;0	21404	typicalEnhancer	23931
chr1	27320327	27339974	19648	*	5	5351	21402.6	5_GES1-WT_peak_847_lociStitched	Promoter (<=1kb)	1	27331511	27339333	7823	2	115572	uc010ofj.2	0	ENSG00000158246	TENT5B	terminal nucleotidyltransferase 5B	uc010ofj.2;uc001bnj.4	115572;388610	0;0	21402.6	typicalEnhancer	23930
chr7	92601820	92617462	15643	*	2	3210	21348	2_GES1-WT_peak_38191_lociStitched	Distal Intergenic	7	92728826	92747336	18511	2	54809	uc003umf.3	129874	ENSG00000205413	SAMD9	sterile alpha motif domain containing 9	NA	NA	NA	21348	typicalEnhancer	23929
chr6	113672515	113682803	10289	*	2	3019	21337.3	2_GES1-WT_peak_35923_lociStitched	Distal Intergenic	6	114178527	114184652	6126	1	4082	uc003pvy.4	-495724	ENSG00000277443	MARCKS	myristoylated alanine rich protein kinase C substrate	NA	NA	NA	21337.3	typicalEnhancer	23928
chr4	169495455	169511108	15654	*	6	4634	21336.4	6_GES1-WT_peak_31304_lociStitched	Intron (uc003iru.3/23022, intron 2 of 20)	4	169552768	169849608	296841	1	23022	uc003irv.3	-41660	ENSG00000129116	PALLD	palladin, cytoskeletal associated protein	uc003iru.3;uc011cjx.2	23022;23022	0;0	21336.4	typicalEnhancer	23927
chr22	27282818	27300999	18182	*	3	4440	21322	3_GES1-WT_peak_26366_lociStitched	Distal Intergenic	22	27053446	27072440	18995	1	440823	uc003add.2	229372	ENSG00000225783	MIAT	myocardial infarction associated transcript	NA	NA	NA	21322	typicalEnhancer	23926
chr1	113086057	113088778	2722	*	1	2723	21322	1_GES1-WT_peak_2325_lociStitched	Intron (uc009wgh.3/54879, intron 7 of 8)	1	113051370	113063910	12541	1	7482	uc001ecb.3	34687	ENSG00000134245	WNT2B	Wnt family member 2B	uc009wgh.3;uc001ecc.3;uc010owg.2;uc010owh.2;uc001ecd.3;uc001ece.3;uc001ecf.3;uc001ecg.3;uc010owi.2;uc001ech.3;uc001eci.3;uc009wgi.1;uc010owj.1	54879;54879;54879;54879;54879;54879;54879;54879;54879;54879;54879;54879;54879	0;0;0;0;0;0;0;0;0;0;0;0;0	21322	typicalEnhancer	23925
chr11	128366185	128377742	11558	*	3	4762	21285.2	3_GES1-WT_peak_8772_lociStitched	Intron (uc009zcg.2/2113, intron 1 of 6)	11	128328656	128392205	63550	2	2113	uc009zcg.2	14463	ENSG00000134954	ETS1	ETS proto-oncogene 1, transcription factor	uc009zcg.2;uc009zch.2;uc010sbs.1;uc001qej.2	2113;2113;2113;2113	0;0;0;0	21285.2	typicalEnhancer	23924
chr4	174254730	174268444	13715	*	3	4395	21278.8	3_GES1-WT_peak_31369_lociStitched	Promoter (<=1kb)	4	174252527	174254920	2394	2	3148	uc011ckc.1	0	ENSG00000164104	HMGB2	high mobility group box 2	uc011ckc.1;uc003ita.3;uc003itb.2	3148;3148;3148	0;0;0	21278.8	typicalEnhancer	23923
chr16	87798984	87825113	26130	*	3	4827	21269.8	3_GES1-WT_peak_16332_lociStitched	Promoter (<=1kb)	16	87741418	87799598	58181	2	54758	uc002fki.3	0	ENSG00000104731	KLHDC4	kelch domain containing 4	uc002fki.3;uc002fkj.3;uc002fkl.3;uc010chu.1	54758;54758;54758;54758	0;0;0;-3338	21269.8	typicalEnhancer	23922
chr1	239574113	239593221	19109	*	4	3817	21258.8	4_GES1-WT_peak_4318_lociStitched	Intron (uc001hyo.1/1131, intron 1 of 8)	1	239549865	240049896	500032	1	1131	uc001hyo.1	24248	ENSG00000133019	CHRM3	cholinergic receptor muscarinic 3	uc001hyo.1	1131	0	21258.8	typicalEnhancer	23921
chr19	43703898	43707526	3629	*	3	2903	21221.3	3_GES1-WT_peak_20403_lociStitched	Promoter (1-2kb)	19	43406234	43702427	296194	2	5675	uc010xwk.2	-1471	ENSG00000170848	PSG6	pregnancy specific beta-1-glycoprotein 6	uc002ovy.4;uc002ovz.4;uc002owb.4;uc010xwk.2	5672;5672;5672;5675	0;0;0;0	21221.3	typicalEnhancer	23920
chr17	78756539	78766700	10162	*	3	3440	21219.3	3_GES1-WT_peak_18232_lociStitched	Exon (uc002jys.3/57521, exon 7 of 9)	17	78923236	78940173	16938	1	57521	uc002jyu.1	-156536	ENSG00000141564	RPTOR	regulatory associated protein of MTOR complex 1	uc002jys.3;uc010wuf.1;uc002jyt.1;uc010wug.1	57521;57521;57521;57521	0;0;0;0	21219.3	typicalEnhancer	23919
chr4	7862239	7894942	32704	*	8	5817	21211.8	8_GES1-WT_peak_29813_lociStitched	5' UTR	4	7760440	7941653	181214	2	60312	uc003gkg.1	46711	ENSG00000196526	AFAP1	actin filament associated protein 1	uc003gkg.1;uc011bwk.1	60312;60312	0;0	21211.8	typicalEnhancer	23918
chr19	1847552	1885465	37914	*	7	6295	21205.3	7_GES1-WT_peak_19402_lociStitched	Promoter (<=1kb)	19	1815245	1848452	33208	2	57455	uc002lua.4	0	ENSG00000079313	REXO1	RNA exonuclease 1 homolog	uc002lua.4;uc010dsr.1;uc002lud.3;uc002lue.3;uc002luf.3;uc002lug.3;uc002luc.3	57455;57455;81926;81926;81926;81926;83855	0;0;0;0;0;0;0	21205.3	typicalEnhancer	23917
chr17	7137005	7156168	19164	*	5	4844	21185.8	5_GES1-WT_peak_16587_lociStitched	Promoter (<=1kb)	17	7143738	7145753	2016	2	11337	uc002gfb.3	0	ENSG00000170296	GABARAP	GABA type A receptor-associated protein	uc002gfb.3;uc031qym.1;uc002gez.1;uc010vtr.1;uc010vts.1;uc010clz.1;uc002gfd.2;uc002gfe.2;uc002gfg.1;uc002gfh.1;uc002gfi.1;uc002gfj.3;uc010cmb.3;uc002gfk.1;uc002gfa.3;uc010cma.3;uc010vtt.2	11337;11337;1856;1856;1856;1856;23399;23399;23587;23587;23587;23587;23587;23587;79142;79142;79142	0;0;0;0;-3256;0;0;0;0;0;0;0;0;0;0;0;0	21185.8	typicalEnhancer	23916
chr1	240895893	240903785	7893	*	2	2484	21161.9	2_GES1-WT_peak_4353_lociStitched	Distal Intergenic	1	240938817	240950738	11922	2	6000	uc010pyi.1	46953	ENSG00000182901	RGS7	regulator of G protein signaling 7	NA	NA	NA	21161.9	typicalEnhancer	23915
chr20	34462768	34472647	9880	*	2	3825	21161	2_GES1-WT_peak_24919_lociStitched	Intron (uc002xei.1/51230, intron 10 of 11)	20	34430495	34457473	26979	1	51230	uc002xel.1	32273	ENSG00000025293	PHF20	PHD finger protein 20	uc002xei.1;uc002xej.1;uc010gfo.1;uc002xek.1	51230;51230;51230;51230	0;0;0;0	21161	typicalEnhancer	23914
chr11	10314703	10326403	11701	*	2	4757	21154.2	2_GES1-WT_peak_6916_lociStitched	Promoter (<=1kb)	11	9800214	10315754	515541	2	81846	uc001mib.2	0	ENSG00000133812	SBF2	SET binding factor 2	uc001mil.1;uc001mib.2	133;81846	-239;0	21154.2	typicalEnhancer	23913
chr5	9342822	9360343	17522	*	3	5496	21149.1	3_GES1-WT_peak_31666_lociStitched	Intron (uc003jek.2/9037, intron 3 of 22)	5	9035138	9546233	511096	2	9037	uc003jek.2	185890	ENSG00000112902	SEMA5A	semaphorin 5A	uc003jek.2	9037	0	21149.1	typicalEnhancer	23912
chr3	184017002	184054511	37510	*	6	4365	21140.6	6_GES1-WT_peak_29358_lociStitched	Promoter (<=1kb)	3	184053717	184064063	10347	1	131408	uc003foc.3	0	ENSG00000175182	FAM131A	family with sequence similarity 131 member A	uc003foc.3;uc003fod.2;uc003foe.3;uc003fog.3;uc003fno.2;uc010hxw.2;uc003fnp.3;uc003fnq.3;uc003fnr.3;uc003fns.3;uc003fnt.3;uc010hxx.3;uc010hxy.3;uc010hxz.2;uc003fnv.4;uc003fnw.3;uc003fnx.3;uc003fnn.1;uc011brj.1;uc011brk.1;uc003fnz.3	131408;131408;131408;131408;1981;1981;1981;1981;1981;1981;1981;1981;1981;1981;1981;1981;1981;5708;5708;5708;692107	0;-765;-765;-3747;0;0;0;0;0;0;0;0;0;0;0;0;0;0;0;0;0	21140.6	typicalEnhancer	23911
chr18	24050343	24062118	11776	*	3	4562	21122.6	3_GES1-WT_peak_18760_lociStitched	Promoter (<=1kb)	18	24035684	24056855	21172	2	284252	uc002kvy.3	0	ENSG00000134504	KCTD1	potassium channel tetramerization domain containing 1	uc010xbj.3;uc002kvw.4;uc031rht.1;uc010xbk.3;uc031rhu.1;uc002kvy.3	284252;284252;284252;284252;284252;284252	0;0;0;0;0;0	21122.6	typicalEnhancer	23910
chr5	131593404	131605603	12200	*	3	4225	21099.9	3_GES1-WT_peak_33219_lociStitched	Promoter (<=1kb)	5	131593351	131609147	15797	1	8572	uc003kwp.3	53	ENSG00000131435	PDLIM4	PDZ and LIM domain 4	uc003kwn.3;uc003kwo.3;uc003kwp.3	8572;8572;8572	0;0;0	21099.9	typicalEnhancer	23909
chr5	72665789	72671226	5438	*	3	2856	21091.8	3_GES1-WT_peak_32542_lociStitched	Distal Intergenic	5	72794250	72795476	1227	1	689	uc010izd.1	-123024	ENSG00000145741	BTF3	basic transcription factor 3	NA	NA	NA	21091.8	typicalEnhancer	23908
chr17	79008997	79025260	16264	*	4	5232	21084.6	4_GES1-WT_peak_18247_lociStitched	Promoter (<=1kb)	17	79008947	79091232	82286	1	10458	uc010wuh.1	50	ENSG00000175866	BAIAP2	BAR/IMD domain containing adaptor protein 2	uc002jyz.4;uc002jza.2;uc002jzb.2;uc002jzc.2;uc002jzd.2;uc002jze.2;uc002jzf.2;uc002jzg.2;uc010wuh.1;uc002jyy.2	10458;10458;10458;10458;10458;10458;10458;10458;10458;440465	0;0;0;0;0;0;0;0;0;-478	21084.6	typicalEnhancer	23907
chr21	36447496	36459166	11671	*	2	4105	21067.3	2_GES1-WT_peak_25851_lociStitched	Intron (uc002yut.1/861, intron 7 of 10)	21	36160098	36421641	261544	2	861	uc002yuk.4	-25855	ENSG00000159216	RUNX1	RUNX family transcription factor 1	uc002yut.1	861	0	21067.3	typicalEnhancer	23906
chr22	43386382	43411157	24776	*	4	5692	21054.6	4_GES1-WT_peak_26819_lociStitched	Promoter (<=1kb)	22	43265772	43411184	145413	2	11252	uc003bdg.4	27	ENSG00000100266	PACSIN2	protein kinase C and casein kinase substrate in neurons 2	uc003bdg.4	11252	0	21054.6	typicalEnhancer	23905
chr6	169562695	169573527	10833	*	3	3894	21052.9	3_GES1-WT_peak_36718_lociStitched	Distal Intergenic	6	169615875	169654137	38263	2	7058	uc003qwt.3	80610	ENSG00000186340	THBS2	thrombospondin 2	NA	NA	NA	21052.9	typicalEnhancer	23904
chr6	44191252	44233296	42045	*	7	6488	21039.3	7_GES1-WT_peak_35203_lociStitched	Promoter (<=1kb)	6	44221943	44222022	80	2	100616124	uc021yzy.1	0	ENSG00000284427	MIR4647	microRNA 4647	uc021yzy.1;uc021yzw.1;uc011dvp.1;uc003owu.1;uc003owv.1;uc003oww.1;uc011dvq.2;uc003owx.2;uc003owy.2;uc003owz.1;uc021yzx.1;uc031sor.1;uc003oxa.2;uc003oxb.2;uc011dvr.2;uc011dvs.2;uc003oxc.2;uc003oxd.3;uc011dvt.2;uc011dvu.2;uc003oxe.1	100616124;2030;2030;2030;2030;2030;2030;2030;2030;2030;2030;3326;3326;3326;3326;3326;3326;347734;347734;347734;4794	0;0;0;0;0;0;0;0;0;0;0;0;0;0;0;0;0;0;0;0;0	21039.3	typicalEnhancer	23903
chr4	129259430	129280110	20681	*	5	4218	21016	5_GES1-WT_peak_30853_lociStitched	Distal Intergenic	4	129190392	129209984	19593	2	10424	uc003igg.3	-49446	ENSG00000164040	PGRMC2	progesterone receptor membrane component 2	NA	NA	NA	21016	typicalEnhancer	23902
chr6	36544474	36570492	26019	*	5	4821	21007.7	5_GES1-WT_peak_35018_lociStitched	Promoter (<=1kb)	6	36562090	36568658	6569	1	6428	uc011dtp.1	0	ENSG00000112081	SRSF3	serine and arginine rich splicing factor 3	uc011dtp.1;uc003omj.3;uc003omk.3	6428;6428;6428	0;0;0	21007.7	typicalEnhancer	23901
chr5	167060446	167081466	21021	*	4	6171	21004.2	4_GES1-WT_peak_33874_lociStitched	Intron (uc021yhi.1/57451, intron 2 of 3)	5	167181993	167545491	363499	1	57451	uc003lzq.3	-100527	ENSG00000145934	TENM2	teneurin transmembrane protein 2	uc021yhi.1;uc010jjd.3	57451;57451	0;0	21004.2	typicalEnhancer	23900
chrX	10722242	10725106	2865	*	2	2548	20999.9	2_GES1-WT_peak_43094_lociStitched	Intron (uc004cti.4/4281, intron 1 of 9)	23	10422910	10645779	222870	2	4281	uc011mie.1	-76463	ENSG00000101871	MID1	midline 1	uc004cti.4;uc004ctj.4	4281;4281	0;0	20999.9	typicalEnhancer	23899
chr1	51425169	51444120	18952	*	3	4538	20974.2	3_GES1-WT_peak_1367_lociStitched	Promoter (<=1kb)	1	51433608	51440309	6702	1	1031	uc001csf.3	0	ENSG00000123080	CDKN2C	cyclin dependent kinase inhibitor 2C	uc001csf.3;uc001csg.3;uc009vyw.1;uc001cse.1	1031;1031;11124;11124	0;0;0;0	20974.2	typicalEnhancer	23898
chr17	21178641	21192064	13424	*	7	3490	20965.6	7_GES1-WT_peak_16903_lociStitched	Promoter (<=1kb)	17	21187968	21218551	30584	1	5606	uc002gys.3	0	ENSG00000034152	MAP2K3	mitogen-activated protein kinase kinase 3	uc002gys.3;uc002gyt.3;uc021tsq.1	5606;5606;5606	0;0;0	20965.6	typicalEnhancer	23897
chr16	4340523	4378753	38231	*	7	6321	20962.1	7_GES1-WT_peak_15119_lociStitched	Distal Intergenic	16	4382216	4389598	7383	1	84662	uc002cwc.1	-3463	ENSG00000126603	GLIS2	GLIS family zinc finger 2	uc002cwc.1	84662	-3463	20962.1	typicalEnhancer	23896
chr20	46912356	46925363	13008	*	2	3373	20958.5	2_GES1-WT_peak_25153_lociStitched	Distal Intergenic	20	46988654	46999381	10728	1	284749	uc002xtt.2	-63291	ENSG00000235621	LINC00494	long intergenic non-protein coding RNA 494	NA	NA	NA	20958.5	typicalEnhancer	23895
chr1	10569095	10572300	3206	*	1	3207	20933.6	1_GES1-WT_peak_402_lociStitched	Intron (uc001arl.3/5195, intron 2 of 2)	1	10588312	10690815	102504	1	5195	uc009vmw.3	-16012	ENSG00000142655	PEX14	peroxisomal biogenesis factor 14	uc001arl.3;uc001arm.1;uc009vmu.1;uc001arn.3;uc009vmv.3;uc010oam.2;uc010oan.2	5195;5195;5195;5195;5195;5195;5195	0;0;0;0;0;0;0	20933.6	typicalEnhancer	23894
chr11	5384668	5388623	3956	*	3	3195	20908.6	3_GES1-WT_peak_6828_lociStitched	Intron (uc001mak.1/3048, intron 4 of 6)	11	5372738	5373676	939	1	390058	uc010qzb.2	11930	ENSG00000176239	OR51B6	olfactory receptor family 51 subfamily B member 6	uc021qcv.1;uc001maq.2;uc001mam.1;uc001mak.1	282763;282763;3046;3048	0;0;0;0	20908.6	typicalEnhancer	23893
chr3	171518686	171529980	11295	*	4	4022	20902.5	4_GES1-WT_peak_29208_lociStitched	Promoter (<=1kb)	3	171318195	171528504	210310	2	5337	uc003fhs.3	0	ENSG00000075651	PLD1	phospholipase D1	uc003fhs.3;uc003fht.3	5337;5337	0;0	20902.5	typicalEnhancer	23892
chr5	27315110	27317458	2349	*	1	2350	20900.9	1_GES1-WT_peak_31805_lociStitched	Distal Intergenic	5	27472399	27485935	13537	1	643401	uc003jgt.2	-154941	ENSG00000250337	PURPL	p53 upregulated regulator of p53 levels	NA	NA	NA	20900.9	typicalEnhancer	23891
chr1	198529753	198548004	18252	*	4	3659	20894.9	4_GES1-WT_peak_3455_lociStitched	Distal Intergenic	1	198492352	198510075	17724	2	127124	uc001gup.3	-19678	ENSG00000151418	ATP6V1G3	ATPase H+ transporting V1 subunit G3	NA	NA	NA	20894.9	typicalEnhancer	23890
chr9	90884962	90898083	13122	*	2	2596	20867.9	2_GES1-WT_peak_41833_lociStitched	Distal Intergenic	9	91002840	91093622	90783	1	10927	uc010mqj.3	-104757	ENSG00000106723	SPIN1	spindlin 1	NA	NA	NA	20867.9	typicalEnhancer	23889
chrX	45364721	45377289	12569	*	5	4716	20826.8	5_GES1-WT_peak_43513_lociStitched	Exon (uc004dgj.1/uc004dgj.1, exon 2 of 4)	23	45589988	45592021	2034	1	392452	uc031tjh.1	-212699	NA	MFFP3	MFF pseudogene 3	NA	NA	NA	20826.8	typicalEnhancer	23888
chr7	90253421	90256252	2832	*	1	2833	20816.3	1_GES1-WT_peak_38152_lociStitched	Intron (uc003ukt.1/5218, intron 5 of 7)	7	90225720	90839904	614185	1	5218	uc003uky.2	27701	ENSG00000058091	CDK14	cyclin dependent kinase 14	uc003ukt.1;uc003uku.1;uc003ukv.1;uc003ukx.1;uc003uky.2	5218;5218;5218;5218;5218	0;0;0;0;0	20816.3	typicalEnhancer	23887
chr5	95095168	95110002	14835	*	4	3924	20815	4_GES1-WT_peak_32822_lociStitched	Exon (uc003klm.3/22836, exon 7 of 12)	5	95066850	95132071	65222	1	22836	uc003klm.3	28318	ENSG00000164292	RHOBTB3	Rho related BTB domain containing 3	uc003klk.1;uc003klm.3	22836;22836	0;0	20815	typicalEnhancer	23886
chr15	60654725	60672677	17953	*	5	2923	20812.9	5_GES1-WT_peak_14043_lociStitched	Exon (uc002agk.3/302, exon 5 of 14)	15	60639350	60690185	50836	2	302	uc002agk.3	17508	ENSG00000182718	ANXA2	annexin A2	uc002agk.3;uc002agl.3;uc002agm.3;uc002agn.3;uc010uhd.2;uc010bgj.3	302;302;302;302;302;302	0;0;0;0;0;0	20812.9	typicalEnhancer	23885
chr18	3447284	3452601	5318	*	5	3004	20807.7	5_GES1-WT_peak_18401_lociStitched	Promoter (<=1kb)	18	3447608	3458406	10799	1	7050	uc002klv.3	0	ENSG00000177426	TGIF1	TGFB induced factor homeobox 1	uc002klu.3;uc002klv.3;uc002klw.3;uc002klx.3;uc010dkm.1;uc002kly.3;uc002klz.3;uc002kma.3;uc002kmb.3;uc002kmc.3	7050;7050;7050;7050;7050;7050;7050;7050;7050;7050	0;0;0;0;0;0;0;0;-1171;-2811	20807.7	typicalEnhancer	23884
chr18	394936	422085	27150	*	4	5572	20799.6	4_GES1-WT_peak_18346_lociStitched	Intron (uc002kkm.3/81035, intron 2 of 9)	18	319355	500729	181375	2	81035	uc002kkm.3	78644	ENSG00000158270	COLEC12	collectin subfamily member 12	uc002kkm.3	81035	0	20799.6	typicalEnhancer	23883
chr15	42221983	42237783	15801	*	2	3874	20795.7	2_GES1-WT_peak_13790_lociStitched	3' UTR	15	42191639	42264755	73117	2	30844	uc001zot.3	26972	ENSG00000103966	EHD4	EH domain containing 4	uc001zot.3;uc001zou.2	30844;30844	0;0	20795.7	typicalEnhancer	23882
chr7	73686298	73727751	41454	*	9	7270	20785	9_GES1-WT_peak_37913_lociStitched	Promoter (<=1kb)	7	73703805	73820273	116469	1	7461	uc003uam.3	0	ENSG00000106665	CLIP2	CAP-Gly domain containing linker protein 2	uc003uam.3;uc003uan.3	7461;7461	0;0	20785	typicalEnhancer	23881
chr1	121088764	121138663	49900	*	9	6541	20783.3	9_GES1-WT_peak_2495_lociStitched	Promoter (<=1kb)	1	121107152	121129827	22676	1	100996712	uc031pnu.1	0	NA	SRGAP2D	SLIT-ROBO Rho GTPase activating protein 2D (pseudogene)	uc031pnu.1	100996712	0	20783.3	typicalEnhancer	23880
chr6	26270914	26296667	25754	*	4	5123	20778.3	4_GES1-WT_peak_34713_lociStitched	Promoter (<=1kb)	6	26273204	26273640	437	1	8346	uc003nhk.3	0	ENSG00000278588	H2BC10	H2B clustered histone 10	uc003nhk.3;uc003nhi.3;uc003nhm.2	8346;8355;8365	0;0;0	20778.3	typicalEnhancer	23879
chr9	98555496	98585970	30475	*	5	7144	20750.4	5_GES1-WT_peak_41991_lociStitched	Exon (uc004avp.4/100128782, exon 3 of 3)	9	98637900	98717204	79305	1	375748	uc010mrx.1	-51930	ENSG00000182150	ERCC6L2	ERCC excision repair 6 like 2	uc004avp.4	100128782	0	20750.4	typicalEnhancer	23878
chr10	54110518	54113227	2710	*	2	2314	20742.3	2_GES1-WT_peak_5367_lociStitched	Distal Intergenic	10	54074041	54077417	3377	1	22943	uc001jjr.3	36477	ENSG00000107984	DKK1	dickkopf WNT signaling pathway inhibitor 1	NA	NA	NA	20742.3	typicalEnhancer	23877
chr8	123692944	123706213	13270	*	3	3037	20733	3_GES1-WT_peak_40522_lociStitched	Distal Intergenic	8	123793901	123986755	192855	1	22882	uc003ypk.1	-87688	ENSG00000178764	ZHX2	zinc fingers and homeoboxes 2	NA	NA	NA	20733	typicalEnhancer	23876
chr12	43353317	43356614	3298	*	3	2626	20726.6	3_GES1-WT_peak_9413_lociStitched	Distal Intergenic	12	42863252	42983572	120321	2	144165	uc009zka.2	-369745	ENSG00000139174	PRICKLE1	prickle planar cell polarity protein 1	NA	NA	NA	20726.6	typicalEnhancer	23875
chr15	31307968	31325856	17889	*	3	5176	20704.7	3_GES1-WT_peak_13542_lociStitched	Exon (uc001zfl.3/4308, exon 18 of 23)	15	31231151	31283807	52657	2	54893	uc001zfi.1	-24161	ENSG00000166912	MTMR10	myotubularin related protein 10	uc001zfl.3;uc010azy.3;uc001zfm.3;uc021shz.1;uc021sia.1	4308;4308;4308;4308;4308	0;0;0;0;0	20704.7	typicalEnhancer	23874
chr11	65769052	65789055	20004	*	3	3969	20684.1	3_GES1-WT_peak_7710_lociStitched	Promoter (<=1kb)	11	65779462	65780976	1515	1	1474	uc001ogr.3	0	ENSG00000175315	CST6	cystatin E/M	uc001ogt.3;uc001ogr.3;uc001ogm.2;uc001ogn.2;uc021qlr.1;uc021qls.1;uc021qlt.1;uc021qlu.1;uc021qlv.1;uc001ogo.3;uc001ogp.3	117144;1474;84285;84285;84285;84285;84285;84285;84285;8815;8815	0;0;0;0;0;0;0;0;0;0;0	20684.1	typicalEnhancer	23873
chr3	125926462	125936259	9798	*	3	3416	20659.1	3_GES1-WT_peak_28542_lociStitched	3' UTR	3	125822404	125900029	77626	2	10840	uc031sbp.1	-26433	ENSG00000144908	ALDH1L1	aldehyde dehydrogenase 1 family member L1	uc003eiq.4	100862662	0	20659.1	typicalEnhancer	23872
chr9	73026030	73035847	9818	*	2	5681	20656.1	2_GES1-WT_peak_41555_lociStitched	Promoter (<=1kb)	9	72999513	73029573	30061	2	687	uc004aht.3	0	ENSG00000119138	KLF9	Kruppel like factor 9	uc004aht.3	687	0	20656.1	typicalEnhancer	23871
chr9	137257381	137272708	15328	*	3	4629	20654.5	3_GES1-WT_peak_42875_lociStitched	Promoter (<=1kb)	9	137271257	137271318	62	1	100616236	uc022bpa.1	0	ENSG00000263897	MIR4669	microRNA 4669	uc022bpa.1;uc004cfa.1;uc004cfb.2	100616236;6256;6256	0;0;0	20654.5	typicalEnhancer	23870
chr10	643762	657526	13765	*	3	2589	20648.9	3_GES1-WT_peak_4507_lociStitched	Intron (uc001ifp.3/22982, intron 1 of 36)	10	687629	687718	90	2	100847086	uc010qaa.2	30192	ENSG00000263511	MIR5699	microRNA 5699	uc001ifp.3	22982	0	20648.9	typicalEnhancer	23869
chr11	47197573	47238767	41195	*	6	7808	20638.7	6_GES1-WT_peak_7397_lociStitched	Promoter (<=1kb)	11	47236493	47260769	24277	1	1643	uc001neb.2	0	ENSG00000134574	DDB2	damage specific DNA binding protein 2	uc001neb.2;uc001nec.2;uc001ned.2;uc001nee.2;uc009yli.1;uc001nef.2;uc001ndw.3;uc001ndx.3;uc001ndy.3;uc010rha.2;uc001ndt.3;uc001ndu.3;uc010rhb.2;uc010rhc.2;uc010rhd.2	1643;1643;1643;1643;1643;1643;29763;29763;29763;84364;84364;84364;84364;84364;84364	0;0;0;0;0;0;0;0;0;-2182;0;0;0;0;0	20638.7	typicalEnhancer	23868
chr10	2153063	2164865	11803	*	4	3947	20635.2	4_GES1-WT_peak_4522_lociStitched	Distal Intergenic	10	2047667	2056542	8876	2	282980	uc001igo.2	-96521	NA	LINC00700	long intergenic non-protein coding RNA 700	NA	NA	NA	20635.2	typicalEnhancer	23867
chr2	192033812	192037978	4167	*	4	2575	20611.6	4_GES1-WT_peak_23469_lociStitched	Promoter (<=1kb)	2	192011339	192037397	26059	2	6775	uc010zgm.1	0	ENSG00000138378	STAT4	signal transducer and activator of transcription 4	uc010zgm.1;uc010zgn.1;uc010zgo.1	6775;6775;6775	0;0;0	20611.6	typicalEnhancer	23866
chr1	36838740	36874697	35958	*	5	6031	20607.5	5_GES1-WT_peak_1097_lociStitched	Promoter (<=1kb)	1	36805225	36851485	46261	2	83931	uc001cak.1	0	ENSG00000196182	STK40	serine/threonine kinase 40	uc001cak.1;uc001cal.1;uc001cam.1;uc001cao.1	83931;83931;83931;84967	0;0;0;0	20607.5	typicalEnhancer	23865
chr7	80506115	80514268	8154	*	3	3249	20597	3_GES1-WT_peak_38064_lociStitched	Intron (uc003uhj.3/10512, intron 2 of 17)	7	80371854	80548667	176814	2	10512	uc003uhj.3	34399	ENSG00000075223	SEMA3C	semaphorin 3C	uc003uhj.3;uc011kgw.2;uc011kgx.1	10512;10512;10512	0;0;0	20597	typicalEnhancer	23864
chr8	41649022	41686479	37458	*	5	6291	20594.4	5_GES1-WT_peak_39741_lociStitched	Promoter (<=1kb)	8	41510744	41655140	144397	2	286	uc003xoi.3	0	ENSG00000029534	ANK1	ankyrin 1	uc003xoi.3;uc003xoj.3;uc003xok.3;uc003xol.3;uc003xom.3	286;286;286;286;286	0;0;0;0;0	20594.4	typicalEnhancer	23863
chr17	35835889	35851487	15599	*	4	4615	20593.8	4_GES1-WT_peak_17115_lociStitched	Promoter (<=1kb)	17	35849951	35873588	23638	1	11072	uc002hnx.2	0	ENSG00000276023	DUSP14	dual specificity phosphatase 14	uc002hnx.2;uc002hnt.3;uc002hnv.3;uc002hnw.3	11072;6871;6871;6871	0;0;0;0	20593.8	typicalEnhancer	23862
chr9	2808809	2819191	10383	*	3	3641	20591.6	3_GES1-WT_peak_40939_lociStitched	Exon (uc003zhp.1/9933, exon 14 of 18)	9	2804155	2844130	39976	2	9933	uc003zhp.1	24939	ENSG00000080608	PUM3	pumilio RNA binding family member 3	uc003zhp.1;uc003zhq.1	9933;9933	0;0	20591.6	typicalEnhancer	23861
chr2	56749529	56762606	13078	*	3	4419	20586.1	3_GES1-WT_peak_21795_lociStitched	Distal Intergenic	2	56411258	56613309	202052	1	114800	uc002rzn.3	338271	ENSG00000055813	CCDC85A	coiled-coil domain containing 85A	NA	NA	NA	20586.1	typicalEnhancer	23860
chr1	172311816	172328864	17049	*	4	5485	20581.6	4_GES1-WT_peak_3158_lociStitched	Intron (uc001gie.4/26052, intron 17 of 20)	1	172348158	172387567	39410	1	26052	uc001gih.1	-19294	ENSG00000197959	DNM3	dynamin 3	uc001gie.4;uc001gif.4	26052;26052	0;0	20581.6	typicalEnhancer	23859
chr1	179177911	179204602	26692	*	4	4372	20566.2	4_GES1-WT_peak_3260_lociStitched	Promoter (<=1kb)	1	179068462	179198819	130358	2	27	uc001gmj.4	0	ENSG00000143322	ABL2	ABL proto-oncogene 2, non-receptor tyrosine kinase	uc001gmj.4;uc010pnf.2;uc010png.2;uc010pnh.2;uc009wxe.3	27;27;27;27;27	0;0;0;0;0	20566.2	typicalEnhancer	23858
chr16	4513746	4551146	37401	*	6	6610	20559.3	6_GES1-WT_peak_15134_lociStitched	Promoter (<=1kb)	16	4524719	4560348	35630	1	3163	uc010bts.3	0	ENSG00000103415	HMOX2	heme oxygenase 2	uc010bts.3;uc002cwq.4;uc002cwr.4;uc002cwt.3;uc010btt.3;uc002cwm.3;uc002cwn.3;uc002cwo.3	3163;3163;3163;3163;3163;57407;57407;57407	0;0;0;0;0;0;0;0	20559.3	typicalEnhancer	23857
chr7	14860926	14876278	15353	*	2	4256	20557.7	2_GES1-WT_peak_36993_lociStitched	Intron (uc003ssz.3/1607, intron 1 of 24)	7	14184674	14881075	696402	2	1607	uc003ssz.3	4797	ENSG00000136267	DGKB	diacylglycerol kinase beta	uc003ssz.3;uc011jxt.2;uc003sta.3;uc011jxu.2;uc011jxv.1	1607;1607;1607;1607;1607	0;0;0;0;0	20557.7	typicalEnhancer	23856
chr8	119013291	119038120	24830	*	4	4915	20549.3	4_GES1-WT_peak_40456_lociStitched	Intron (uc003yok.1/2131, intron 1 of 10)	8	118811602	119124058	312457	2	2131	uc003yok.1	85938	ENSG00000182197	EXT1	exostosin glycosyltransferase 1	uc003yok.1	2131	0	20549.3	typicalEnhancer	23855
chr9	124030120	124051698	21579	*	4	4278	20545.4	4_GES1-WT_peak_42477_lociStitched	Promoter (<=1kb)	9	124030380	124095120	64741	1	2934	uc004ble.1	0	ENSG00000148180	GSN	gelsolin	uc004bld.1;uc004ble.1;uc010mvq.1;uc010mvr.1;uc010mvs.1;uc010mvt.1;uc010mvu.2;uc010mvv.1;uc011lyh.2;uc011lyi.2	2934;2934;2934;2934;2934;2934;2934;2934;2934;2934	0;0;0;0;0;0;0;0;0;0	20545.4	typicalEnhancer	23854
chr9	101781277	101804187	22911	*	3	5549	20532.8	3_GES1-WT_peak_42056_lociStitched	Exon (uc004azb.2/1306, exon 12 of 42)	9	101867412	101916473	49062	1	7046	uc004azc.3	-63225	ENSG00000106799	TGFBR1	transforming growth factor beta receptor 1	uc004azb.2	1306	0	20532.8	typicalEnhancer	23853
chr18	10009889	10017602	7714	*	3	3661	20523.9	3_GES1-WT_peak_18524_lociStitched	Distal Intergenic	18	9913955	9960018	46064	1	9218	uc002kok.3	95934	ENSG00000101558	VAPA	VAMP associated protein A	NA	NA	NA	20523.9	typicalEnhancer	23852
chr11	66093554	66115634	22081	*	4	5763	20513.2	4_GES1-WT_peak_7725_lociStitched	Promoter (<=1kb)	11	66112843	66115161	2319	2	11041	uc001ohr.3	0	ENSG00000174684	B4GAT1	beta-1,4-glucuronyltransferase 1	uc001ohr.3;uc001oho.1;uc001ohp.1;uc009yre.3;uc010roy.1;uc009yrd.1;uc001ohn.1;uc010roz.1;uc010rpa.1	11041;25855;25855;25855;9610;9610;9610;9610;9610	0;0;0;0;0;0;0;0;0	20513.2	typicalEnhancer	23851
chr14	78047039	78082906	35868	*	5	6981	20512.9	5_GES1-WT_peak_13087_lociStitched	Promoter (<=1kb)	14	77972340	78083110	110771	2	9517	uc001xub.3	204	ENSG00000100596	SPTLC2	serine palmitoyltransferase long chain base subunit 2	uc001xub.3	9517	0	20512.9	typicalEnhancer	23850
chr17	74862813	74869635	6823	*	4	3144	20502.4	4_GES1-WT_peak_18105_lociStitched	Promoter (<=1kb)	17	74864798	74878607	13810	1	146664	uc002jtg.4	0	ENSG00000167889	MGAT5B	alpha-1,6-mannosylglycoprotein 6-beta-N-acetylglucosaminyltransferase B	uc002jtg.4;uc002jth.3;uc031rem.1;uc002jti.3	146664;146664;146664;146664	0;0;0;0	20502.4	typicalEnhancer	23849
chr2	55276346	55279777	3432	*	2	2953	20494.9	2_GES1-WT_peak_21747_lociStitched	Promoter (<=1kb)	2	55199327	55277734	78408	2	57142	uc002rye.3	0	ENSG00000115310	RTN4	reticulon 4	uc002ryd.3;uc002rye.3;uc002ryf.3;uc002ryg.3	57142;57142;57142;57142	0;0;0;0	20494.9	typicalEnhancer	23848
chr2	208369266	208380075	10810	*	3	4327	20447.1	3_GES1-WT_peak_23702_lociStitched	Distal Intergenic	2	208394616	208441649	47034	1	1385	uc010ziz.1	-14541	ENSG00000118260	CREB1	cAMP responsive element binding protein 1	NA	NA	NA	20447.1	typicalEnhancer	23847
chr1	23694394	23730372	35979	*	6	6065	20443.3	6_GES1-WT_peak_710_lociStitched	Promoter (<=1kb)	1	23695464	23698330	2867	1	148898	uc001bgw.3	0	ENSG00000249087	ZNF436-AS1	ZNF436 antisense RNA 1	uc001bgw.3;uc021oif.2;uc021oig.1;uc009vqm.2;uc021oih.1;uc010ody.1;uc001bgt.3;uc001bgu.3	148898;148898;6920;6920;6920;6920;80818;80818	0;0;0;0;0;20889;0;0	20443.3	typicalEnhancer	23846
chr12	106409926	106425739	15814	*	3	3539	20430.1	3_GES1-WT_peak_10546_lociStitched	Distal Intergenic	12	106457125	106533811	76687	2	9891	uc001tlj.1	108072	ENSG00000074590	NUAK1	NUAK family kinase 1	NA	NA	NA	20430.1	typicalEnhancer	23845
chr11	77733808	77763325	29518	*	4	5088	20426.5	4_GES1-WT_peak_8012_lociStitched	Promoter (<=1kb)	11	77726761	77734320	7560	2	65987	uc001oyw.4	0	ENSG00000151364	KCTD14	potassium channel tetramerization domain containing 14	uc021qnr.1;uc021qns.1;uc021qnt.1;uc001oyw.4	100532726;100532726;100532726;65987	0;0;0;0	20426.5	typicalEnhancer	23844
chr6	2971083	3000605	29523	*	5	5356	20421.1	5_GES1-WT_peak_34260_lociStitched	Promoter (<=1kb)	6	2988201	2991405	3205	1	401232	uc011dhq.2	0	ENSG00000244041	LINC01011	long intergenic non-protein coding RNA 1011	uc011dhq.2;uc003mur.5;uc003mup.1;uc003mus.2;uc003mut.2;uc031smn.1;uc031smo.1;uc003mum.4;uc003mun.4;uc003muo.3	401232;401232;4835;4835;4835;5269;5269;5269;5269;5269	0;0;0;0;0;0;0;0;0;0	20421.1	typicalEnhancer	23843
chr3	191808642	191810884	2243	*	1	2244	20417.4	1_GES1-WT_peak_29519_lociStitched	Distal Intergenic	3	191857182	192126838	269657	2	2257	uc003fsx.3	315954	ENSG00000114279	FGF12	fibroblast growth factor 12	NA	NA	NA	20417.4	typicalEnhancer	23842
chr11	120195992	120207719	11728	*	3	3777	20407.9	3_GES1-WT_peak_8633_lociStitched	Promoter (<=1kb)	11	120207618	120319068	111451	1	23365	uc021qrm.1	0	ENSG00000196914	ARHGEF12	Rho guanine nucleotide exchange factor 12	uc001pxg.3;uc001pxh.2;uc001pxi.2;uc001pxj.3;uc009zas.2;uc010rzm.2;uc021qrl.1;uc021qrm.1;uc001pxl.2;uc009zat.3	219902;219902;219902;219902;219902;219902;219902;23365;23365;23365	0;0;0;0;0;0;0;0;0;0	20407.9	typicalEnhancer	23841
chr10	103874035	103893848	19814	*	5	4330	20388.6	5_GES1-WT_peak_6247_lociStitched	Promoter (<=1kb)	10	103892787	103910090	17304	1	23082	uc001kum.3	0	ENSG00000148840	PPRC1	PPARG related coactivator 1	uc001kum.3;uc001kun.3;uc010qqj.2;uc001kuk.4;uc009xwz.3;uc001kul.3	23082;23082;23082;8861;8861;8861	0;0;0;0;0;0	20388.6	typicalEnhancer	23840
chr5	167229143	167242819	13677	*	2	4041	20384.2	2_GES1-WT_peak_33882_lociStitched	Intron (uc021yhi.1/57451, intron 2 of 3)	5	167181993	167691162	509170	1	57451	uc003lzr.5	47150	ENSG00000145934	TENM2	teneurin transmembrane protein 2	uc021yhi.1;uc010jjd.3;uc003lzq.3;uc003lzr.5	57451;57451;57451;57451	0;0;0;0	20384.2	typicalEnhancer	23839
chr9	33150866	33167206	16341	*	4	4276	20367.4	4_GES1-WT_peak_41242_lociStitched	Promoter (<=1kb)	9	33110639	33167356	56718	2	2683	uc003zsg.2	150	ENSG00000086062	B4GALT1	beta-1,4-galactosyltransferase 1	uc003zsg.2	2683	0	20367.4	typicalEnhancer	23838
chr12	53440333	53473986	33654	*	6	5210	20364	6_GES1-WT_peak_9672_lociStitched	Promoter (<=1kb)	12	53440810	53458162	17353	1	23371	uc001sbl.3	0	ENSG00000111077	TNS2	tensin 2	uc001sbh.4;uc010snu.2;uc010snv.2;uc001sbl.3;uc001sbm.3;uc001sbn.3;uc001sbo.1;uc001sbp.3;uc001sbq.3;uc001sbr.3;uc009zmr.3;uc001sbk.2;uc001sbt.2;uc010snw.2	1975;1975;1975;23371;23371;23371;23371;23371;23371;23371;23371;283335;84926;84926	0;0;0;0;0;0;0;0;0;0;0;0;0;0	20364	typicalEnhancer	23837
chr9	12680656	12709286	28631	*	5	3976	20342.3	5_GES1-WT_peak_41016_lociStitched	Promoter (<=1kb)	9	12693386	12710266	16881	1	7306	uc003zkv.4	0	ENSG00000107165	TYRP1	tyrosinase related protein 1	uc003zkv.4	7306	0	20342.3	typicalEnhancer	23836
chr10	32217297	32234208	16912	*	4	4017	20331.6	4_GES1-WT_peak_5077_lociStitched	Promoter (<=1kb)	10	32094326	32217804	123479	2	94134	uc001ivz.2	0	ENSG00000165322	ARHGAP12	Rho GTPase activating protein 12	uc001ivz.2;uc001iwb.2;uc001iwc.2;uc009xlq.2;uc009xls.3;uc009xlr.2	94134;94134;94134;94134;94134;94134	0;0;0;0;0;0	20331.6	typicalEnhancer	23835
chr1	153505835	153522457	16623	*	3	5061	20316.6	3_GES1-WT_peak_2795_lociStitched	Promoter (<=1kb)	1	153519809	153521734	1926	2	6274	uc001fca.1	0	ENSG00000188015	S100A3	S100 calcium binding protein A3	uc001fca.1;uc001fby.3;uc001fbz.3;uc001fbx.3;uc001fbw.1	6274;6275;6275;6276;6277	0;0;0;0;0	20316.6	typicalEnhancer	23834
[truncated: 23,833 more rows]

## Sheet: Figure 1A_SNU719_SE_ROSE_ann
seqnames	start	end	width	strand	NUM_LOCI	CONSTITUENT_SIZE	SNU719.rep1.chip_final.bam	REGION_ID	annotation	geneChr	geneStart	geneEnd	geneLength	geneStrand	geneId	transcriptId	distanceToTSS	ENSEMBL	SYMBOL	GENENAME	flank_txIds	flank_geneIds	flank_gene_distances	rankBy_vector	EnhancerTypes	rank
[truncated: 27,645 more rows]

## Sheet: Figure 1A_YCCEL1_SE_ROSE_ann
seqnames	start	end	width	strand	NUM_LOCI	CONSTITUENT_SIZE	YCCEL1.chip_final.bam	YCCEL1.input_final.bam	REGION_ID	annotation	geneChr	geneStart	geneEnd	geneLength	geneStrand	geneId	transcriptId	distanceToTSS	ENSEMBL	SYMBOL	GENENAME	flank_txIds	flank_geneIds	flank_gene_distances	rankBy_vector	EnhancerTypes	rank
[truncated: 22,055 more rows]

[truncated: 3 more sheets: Figure1B, Figure 1C, Figure 1D]
