# Supplementary material for: Epigenetic Regulation of MAP3K8 in EBV-Associated Gastric Carcinoma
Source: Int J Mol Sci. 2023 Jan 19;24(3):1964. doi: 10.3390/ijms24031964 (PMC9916342; doi:10.3390/ijms24031964)
Supplement: Supplementary file 1 [file ijms-24-01964-s001.zip › Source data_Figure 2.xlsx]

## Sheet:  Figure 2A
	Figure 2A: Relative mRNA levels of MAP3K8 in MAP3K8 SE repressed SNU719 cells.
	Control (NC)	MAP3K8	GAPDH	ΔCt	2^-ΔCt
		23.7185	18.3655	5.35307	0.0244661
		23.6688	18.361	5.30785	0.0252452
		23.7113	18.4867	5.22462	0.0267444
	CRISPRi MAP3K8 SE Region 1	MAP3K8	GAPDH	ΔCt	2^-ΔCt
		24.1603	18.1233	6.03704	0.015229
		24.1248	18.0627	6.06212	0.0149665
		23.9861	17.9987	5.98738	0.0157623
	CRISPRi MAP3K8 SE Region 2	MAP3K8	GAPDH	ΔCt	2^-ΔCt
		24.3439	17.9388	6.40516	0.0117993
		24.4055	17.9185	6.48699	0.0111486
		24.3953	17.9052	6.49018	0.011124
	CRISPRi MAP3K8 SE Region 3	MAP3K8	GAPDH	ΔCt	2^-ΔCt
		24.3297	18.0432	6.28646	0.0128111
		24.342	18.1791	6.16292	0.0139565
		24.3896	18.1222	6.26733	0.0129821
	CRISPRi MAP3K8 SE Region 4	MAP3K8	GAPDH	ΔCt	2^-ΔCt
		23.8663	18.1201	5.74615	0.018631
		23.9848	18.2078	5.777	0.0182369
		23.9404	18.1871	5.7533	0.0185389

## Sheet: Figure 2B
	Figure 2B: Relative mRNA levels of MAP3K8 in MAP3K8 SE repressed YCCEL1 cells.
	Control (NC)	MAP3K8	GAPDH	ΔCt	2^-ΔCt
		22.65	17.03	5.62	0.0203335
		22.75	17.04	5.71	0.0191038
		22.74	17.17	5.57	0.0210505
	CRISPRi MAP3K8 SE Region 1	MAP3K8	GAPDH	ΔCt	2^-ΔCt
		22.66	16.52	6.14	0.01418
		22.64	16.51	6.13	0.0142786
		22.65	16.55	6.1	0.0145786
	CRISPRi MAP3K8 SE Region 2	MAP3K8	GAPDH	ΔCt	2^-ΔCt
		22.2	16.19	6.01	0.0155171
		22.16	16.2	5.96	0.0160643
		22.11	16.24	5.87	0.0170983
	CRISPRi MAP3K8 SE Region 3	MAP3K8	GAPDH	ΔCt	2^-ΔCt
		22.55	16.62	5.93	0.0164018
		22.53	16.6	5.93	0.0164018
		22.53	16.7	5.83	0.017579
	CRISPRi MAP3K8 SE Region 4	MAP3K8	GAPDH	ΔCt	2^-ΔCt
		22.24	16.15	6.09	0.01468
		22.29	16.2	6.09	0.01468
		22.27	16.23	6.04	0.0151977

## Sheet: Figure 2C
	Figure 2C: Proliferation of MAP3K8 SE repressed SNU719 cells.
		Control (NC)	CRISPRi MAP3K8 SE Region 1	CRISPRi MAP3K8 SE Region 2	CRISPRi MAP3K8 SE Region 3	CRISPRi MAP3K8 SE Region 4
	24h.	0.1806	0.1978	0.2156	0.1732	0.203
		0.2063	0.2091	0.2089	0.2372	0.2063
		0.1927	0.1816	0.1832	0.2169	0.2136
		0.2163	0.1545	0.2003	0.2489	0.225
		Control (NC)	CRISPRi MAP3K8 SE Region 1	CRISPRi MAP3K8 SE Region 2	CRISPRi MAP3K8 SE Region 3	CRISPRi MAP3K8 SE Region 4
	48h.	0.571	0.3208	0.409	0.6205	0.3459
		0.5733	0.3437	0.3977	0.5273	0.4195
		0.5705	0.3356	0.3837	0.5144	0.3906
		0.8373	0.4825	0.466	0.6231	0.4355
		Control (NC)	CRISPRi MAP3K8 SE Region 1	CRISPRi MAP3K8 SE Region 2	CRISPRi MAP3K8 SE Region 3	CRISPRi MAP3K8 SE Region 4
	72h.	1.0654	0.6069	0.646	0.7264	0.5181
		1.0749	0.5892	0.6201	0.7059	0.4973
		1.1455	0.5947	0.6846	0.7517	0.5211
		1.2166	0.7034	0.8602	1.0682	0.6239
		Control (NC)	CRISPRi MAP3K8 SE Region 1	CRISPRi MAP3K8 SE Region 2	CRISPRi MAP3K8 SE Region 3	CRISPRi MAP3K8 SE Region 4
	96h.	1.2844	0.6143	0.8415	0.71	0.5469
		1.417	0.7202	0.7964	0.733	0.5507
		1.4684	0.6733	0.7811	0.8127	0.6291
		1.5452	0.8143	0.8445	0.8677	0.7235
		Control (NC)	CRISPRi MAP3K8 SE Region 1	CRISPRi MAP3K8 SE Region 2	CRISPRi MAP3K8 SE Region 3	CRISPRi MAP3K8 SE Region 4
	120h.	1.8545	0.8104	1.1084	0.9249	0.6887
		1.8311	0.7692	1.0987	0.88	0.7101
		1.7701	0.7815	0.9613	1.0036	0.7289
		1.8912	0.7068	1.2574	1.0608	0.6637

## Sheet: Figure 2D
	Figure 2D: Proliferation of MAP3K8 SE repressed YCCEL1 cells.
		Control (NC)	CRISPRi MAP3K8 SE Region 1	CRISPRi MAP3K8 SE Region 2	CRISPRi MAP3K8 SE Region 3	CRISPRi MAP3K8 SE Region 4
	24h.	0.2143	0.2508	0.2071	0.2156	0.2043
		0.2447	0.2431	0.2364	0.1964	0.2298
		0.2107	0.2287	0.2977	0.2176	0.2419
		0.2918	0.2534	0.2259	0.2885	0.2625
		Control (NC)	CRISPRi MAP3K8 SE Region 1	CRISPRi MAP3K8 SE Region 2	CRISPRi MAP3K8 SE Region 3	CRISPRi MAP3K8 SE Region 4
	48h.	0.484	0.4212	0.4526	0.5058	0.459
		0.4202	0.4036	0.5126	0.4221	0.4007
		0.4848	0.4171	0.4488	0.4306	0.4358
		0.4884	0.3982	0.4094	0.4906	0.453
		Control (NC)	CRISPRi MAP3K8 SE Region 1	CRISPRi MAP3K8 SE Region 2	CRISPRi MAP3K8 SE Region 3	CRISPRi MAP3K8 SE Region 4
	72h.	0.6727	0.5743	0.4448	0.5658	0.4859
		0.6017	0.4486	0.4523	0.5094	0.595
		0.6409	0.5486	0.4781	0.4939	0.5055
		0.6699	0.4599	0.5065	0.559	0.4359
		Control (NC)	CRISPRi MAP3K8 SE Region 1	CRISPRi MAP3K8 SE Region 2	CRISPRi MAP3K8 SE Region 3	CRISPRi MAP3K8 SE Region 4
	96h.	1.1317	0.5418	0.6448	0.7182	0.7892
		1.2058	0.5945	0.7871	0.7454	0.8021
		1.3374	0.4897	0.776	0.6866	0.8245
		1.2029	0.5355	0.7037	0.7388	0.797
		Control (NC)	CRISPRi MAP3K8 SE Region 1	CRISPRi MAP3K8 SE Region 2	CRISPRi MAP3K8 SE Region 3	CRISPRi MAP3K8 SE Region 4
	120h.	1.9568	0.7163	0.9612	0.9157	1.0598
		1.8663	0.6628	0.9249	0.928	1.2275
		1.8682	0.6991	0.8091	0.9467	1.2011
		1.862	0.748	0.9309	0.9847	0.9773

## Sheet: Figure 2E
	Figure 2E: Relative mRNA levels of MAP3K8 in OTX015 treated SNU719 cells.
		MAP3K8	GAPDH	ΔCt	2^-ΔCt
	Control	25.51	19.99	5.52	0.0217929
		25.63	20.07	5.56	0.0211969
		25.48	20.03	5.45	0.0228763
		MAP3K8	GAPDH	ΔCt	2^-ΔCt
	OTX 20	27.05	20.14	6.91	0.00831539
		27.06	20.17	6.89	0.00843147
		27.11	20.16	6.95	0.00808801

## Sheet: Figure 2F
	Figure 2F: WB of OTX015 treated SNU719 cells.
	Chemiluminiscence signals produced by the investigated protein on NC membrane, observed using automated image analyzer										NC membrane with protein marker and chemiluminiscence signals produced by the protein bands
	Chemiluminiscence signals produced by the investigated protein on NC membrane, observed using automated image analyzer										NC membrane with protein marker and chemiluminiscence signals produced by the protein bands
	Note: For the ease of experiment, the NC membrane was carefully cut between 55 KDA and 40 KDa so that both MAP3K8 and β-Actin can be probed simultaneously

## Sheet: Figure 2G
	Figure 2G: Proliferation of OTX015 treated SNU719 cells.
		Control				20 μM
	24h.	0.3398	0.3476	0.2877	0.3201	0.3114	0.3217	0.3255	0.3461
	48h.	0.5854	0.6025	0.6121	0.5917	0.4656	0.3533	0.3691	0.4317
	72h.	0.8839	0.8166	0.8305	0.9377	0.4671	0.4048	0.4523	0.4939
	96h.	1.2042	1.1975	1.2221	1.4027	0.5618	0.568	0.5549	0.4753
	120h.	1.892	1.9546	1.9441	1.7991	0.6675	0.5488	0.6183	0.7058

## Sheet: Figure 2H
	Figure 2H: Relative mRNA levels of MAP3K8 in OTX015 treated YCCEL1 cells.
		MAP3K8	GAPDH	ΔCt	2^-ΔCt
	Control	23.36	18.62	4.74	0.0374212
		23.29	18.59	4.7	0.0384733
		23.21	18.62	4.59	0.0415214
		MAP3K8	GAPDH	ΔCt	2^-ΔCt
	OTX 20	24.9	18.36	6.54	0.0107464
		24.84	18.47	6.37	0.0120904
		24.9	18.47	6.43	0.0115978

## Sheet: Figure 2I
	Figure 2I: WB of OTX015 treated YCCEL1 cells.
	Chemiluminiscence signals produced by the investigated protein on NC membrane, observed using automated image analyzer										NC membrane with protein marker and chemiluminiscence signals produced by the protein bands
	Chemiluminiscence signals produced by the investigated protein on NC membrane, observed using automated image analyzer										NC membrane with protein marker and chemiluminiscence signals produced by the protein bands
	Note: For the ease of experiment, the NC membrane was carefully cut between 55 KDA and 40 KDa so that both MAP3K8 and β-Actin can be probed simultaneously

## Sheet: Figure 2J
	Figure 2J: Proliferation of OTX015 treated YCCEL1 cells.
		Control				20 μM
	24h.	0.2732	0.2943	0.2462	0.2822	0.2757	0.2734	0.2648	0.2814
	48h.	0.5674	0.4628	0.4784	0.4714	0.391	0.3516	0.3811	0.3181
	72h.	1.0317	0.9747	0.9368	0.8416	0.6044	0.4788	0.435	0.5236
	96h.	1.8151	1.4818	1.299	1.5367	0.6605	0.5836	0.7069	0.755
	120h.	2.3316	2.0616	2.1737	2.5533	0.7046	0.7796	0.8048	0.8549
