# Supplementary material for: Epigenetic Regulation of MAP3K8 in EBV-Associated Gastric Carcinoma
Source: Int J Mol Sci. 2023 Jan 19;24(3):1964. doi: 10.3390/ijms24031964 (PMC9916342; doi:10.3390/ijms24031964)
Supplement: Supplementary file 1 [file ijms-24-01964-s001.zip › Source data_Figure 3.xlsx]

## Sheet: Figure 3A
	Figure 3A: The knock-down efficiency of MAP3K8 siRNA in SNU719 cells was determined by qRT-PCR.
	Control (NC)	MAP3K8	GAPDH	ΔCt	2^-ΔCt
		24.09	17.59	6.5	0.0110485
		24.07	17.62	6.45	0.0114382
		23.93	17.62	6.31	0.0126038
	MAP3K8 si#1	MAP3K8	GAPDH	ΔCt	2^-ΔCt
		24.97	17.73	7.24	0.0066152
		25.04	17.77	7.27	0.00647906
		24.9	17.77	7.13	0.00713931
	MAP3K8 si#2	MAP3K8	GAPDH	ΔCt	2^-ΔCt
		26.6	17.81	8.79	0.00225916
		26.21	17.75	8.46	0.00283979
		26.3	17.75	8.55	0.00266805

## Sheet: Figure 3B
	Figure 3B: Proliferation of MAP3K8 siRNA treated SNU719 cells.
		Control (NC)				MAP3K8 si#1				MAP3K8 si#2
	24h.	0.158	0.1668	0.1746	0.1657	0.1686	0.1731	0.1747	0.1879	0.1708	0.1643	0.16	0.1639
	48h.	0.2056	0.2187	0.2095	0.2336	0.1659	0.1651	0.1801	0.1932	0.1754	0.1765	0.1737	0.1882
	72h.	0.3136	0.3343	0.314	0.3744	0.2594	0.2254	0.2284	0.2294	0.2991	0.2454	0.2615	0.2985
	96h.	0.5936	0.5542	0.5875	0.6323	0.3212	0.3103	0.3108	0.3477	0.3231	0.3499	0.3727	0.3262
	120h.	1.1589	1.0602	1.0247	1.2844	0.633	0.5439	0.5872	0.6298	0.5422	0.5876	0.5913	0.5773

## Sheet: WB_Figure 3A,C
	Figures 3A,C: The knock-down efficiency of MAP3K8 siRNA in SNU719 and YCCEL1 cells was determined by WB.
	Chemiluminiscent signals produced by the investigated protein on NC membrane, observed using automated image analyzer										NC membrane with protein marker and chemiluminiscence signals produced by the protein bands
	Chemiluminiscent signals produced by the investigated protein on NC membrane, observed using automated image analyzer										NC membrane with protein marker and chemiluminiscence signals produced by the protein bands
	Note: For the ease of experiment, the NC membrane was carefully cut between 55 KDA and 40 KDa so that both MAP3K8 and β-Actin can be probed simultaneously

## Sheet: Figure 3C
	Figure 3C: The knock-down efficiency of MAP3K8 siRNA in YCCEL1 cells was determined by qRT-PCR.
	Control (NC)	MAP3K8	GAPDH	ΔCt	2^-ΔCt
		23.08	17.17	5.91	0.0166308
		22.93	17.1	5.83	0.017579
		22.92	17.12	5.8	0.0179484
	MAP3K8 si#1	MAP3K8	GAPDH	ΔCt	2^-ΔCt
		24.59	17.02	7.57	0.00526263
		24.6	17.06	7.54	0.00537321
		24.56	17.1	7.46	0.00567958
	MAP3K8 si#2	MAP3K8	GAPDH	ΔCt	2^-ΔCt
		25.61	17.45	8.16	0.00349619
		25.6	17.48	8.12	0.00359448
		25.55	17.5	8.05	0.00377319

## Sheet: Figure 3D
	Figure 3D: Proliferation of MAP3K8 siRNA treated YCCEL1 cells.
		Control (NC)				MAP3K8 si#1				MAP3K8 si#2
	24h.	0.2314	0.2315	0.2319	0.2219	0.1985	0.1988	0.1972	0.2049	0.2029	0.1864	0.19	0.1808
	48h.	0.3207	0.3238	0.36	0.3498	0.2967	0.2561	0.2817	0.2607	0.2714	0.2538	0.244	0.2875
	72h.	0.7125	0.6666	0.7076	0.6698	0.4748	0.4623	0.4553	0.4124	0.406	0.4403	0.4474	0.4297
	96h.	1.2784	1.1137	1.1365	1.2818	0.7673	0.6836	0.7419	0.7356	0.7453	0.6771	0.6848	0.763
	120h.	2.2394	2.3588	2.1965	2.3203	1.4374	1.424	1.5745	1.4923	1.057	1.2165	1.3923	1.1114

## Sheet: Figures 3E,F
	Figures 3E,F: Colony formation assay of MAP3K8 siRNA treated SNU719 cells.
	Control (NC)	MAP3K8 si#1	MAP3K8 si#2
	137	80	43	No. of colonies
	127	75	49
	148	98	44

## Sheet: Figures 3G,H
	Figures 3G,H: Colony formation assay of MAP3K8 siRNA treated YCCEL1 cells.
	Control (NC)	MAP3K8 si#1	MAP3K8 si#2
	128	37	27	No. of colonies
	136	29	31
	142	39	25

## Sheet: Figures 3I,J
	Figures 3I,J: Boyden chamber assisted cell migration assay of MAP3K8 siRNA treated SNU719 cells.
	Control (NC)	MAP3K8 si#1	MAP3K8 si#2
	134	78	41	No. of migrated cells
	121	95	34
	143	82	48

## Sheet: Figures 3K,L
	Figures 3K,L: Boyden chamber assisted cell migration assay of MAP3K8 siRNA treated YCCEL1 cells.
	Control (NC)	MAP3K8 si#1	MAP3K8 si#2
	156	66	10	No. of migrated cells
	168	87	14
	159	76	6
