# Supplementary material for: Epigenetic Regulation of MAP3K8 in EBV-Associated Gastric Carcinoma
Source: Int J Mol Sci. 2023 Jan 19;24(3):1964. doi: 10.3390/ijms24031964 (PMC9916342; doi:10.3390/ijms24031964)
Supplement: Supplementary file 1 [file ijms-24-01964-s001.zip › Source data_Figure 4.xlsx]

## Sheet: Figure 4A
	Figure 4A: Pathway analysis from RNA-seq data.
	The raw sequencing data reported in this paper have been deposited in the Genome Sequence Archive of the BIG Data Center at the Beijing Institute of Genomics, Chinese Academy of Science, under accession number HRA002658. https://ngdc.cncb.ac.cn/gsub/

## Sheet: Figure 4B
	Figure 4B: Notch1, Notch2, and CTBP2 expression in MAP3K8 siRNA treated SNU719 cells.
	Control (NC)	Notch1	GAPDH	ΔCt	2^-ΔCt			Control (NC)	Notch2	GAPDH	ΔCt	2^-ΔCt			Control (NC)	CTBP2	GAPDH	ΔCt	2^-ΔCt
		36.11	18.09	18.02	3.76218e-06				27.75	17.69	10.06	0.000936781				24.34	17.97	6.37	0.0120904
		36.15	18.04	18.11	3.53465e-06				27.66	17.75	9.91	0.00103942				24.15	18.06	6.09	0.01468
		36.25	18.05	18.2	3.32089e-06				27.7	17.7	10	0.000976562				24.26	18.01	6.25	0.013139
	MAP3K8 si#1	Notch1	GAPDH	ΔCt	2^-ΔCt			MAP3K8 si#1	Notch2	GAPDH	ΔCt	2^-ΔCt			MAP3K8 si#1	CTBP2	GAPDH	ΔCt	2^-ΔCt
		36.94	17.78	19.16	1.70712e-06				28.59	17.67	10.92	0.000516122				24.75	17.71	7.04	0.00759887
		37.28	17.76	19.52	1.33013e-06				28.63	17.6	11.03	0.000478233				24.77	17.72	7.05	0.00754638
		36.91	17.76	19.15	1.719e-06				28.71	17.66	11.05	0.000471649				25.01	17.72	7.29	0.00638986
	MAP3K8 si#2	Notch1	GAPDH	ΔCt	2^-ΔCt			MAP3K8 si#2	Notch2	GAPDH	ΔCt	2^-ΔCt			MAP3K8 si#2	CTBP2	GAPDH	ΔCt	2^-ΔCt
		36.48	17.55	18.93	2.00218e-06				28.42	17.53	10.89	0.000526967				25.01	17.58	7.43	0.00579892
		36.57	17.52	19.05	1.84238e-06				28.32	17.58	10.74	0.000584706				25.08	17.64	7.44	0.00575886
		36.49	17.55	18.94	1.98835e-06				28.33	17.55	10.78	0.000568718				25.1	17.55	7.55	0.00533609
	Figure 4B: Notch1, Notch2, and CTBP2 expression in MAP3K8 siRNA treated YCCEL1 cells.
	Control (NC)	Notch1	GAPDH	ΔCt	2^-ΔCt			Control NC)	Notch2	GAPDH	ΔCt	2^-ΔCt			Control (NC)	CTBP2	GAPDH	ΔCt	2^-ΔCt
		32.93	17.11	15.82	1.72864e-05				27.17	17.5	9.67	0.00122755				22.87	17.09	5.78	0.018199
		32.69	17.03	15.66	1.93139e-05				27.22	17.5	9.72	0.00118574				22.91	17.15	5.76	0.018453
		32.72	17.05	15.67	1.91805e-05				27.16	17.54	9.62	0.00127084				22.99	17.13	5.86	0.0172173
	MAP3K8 si#1	Notch1	GAPDH	ΔCt	2^-ΔCt			MAP3K8 si#1	Notch2	GAPDH	ΔCt	2^-ΔCt			MAP3K8 si#1	CTBP2	GAPDH	ΔCt	2^-ΔCt
		33.62	16.86	16.76	9.01026e-06				27.84	17.09	10.75	0.000580668				23.15	17.15	6	0.015625
		33.9	16.94	16.96	7.84389e-06				27.96	17.08	10.88	0.000530632				23.15	17.12	6.03	0.0153034
		33.48	16.99	16.49	1.08646e-05				27.77	17.08	10.69	0.000605326				23.22	17.12	6.1	0.0145786
	MAP3K8 si#2	Notch1	GAPDH	ΔCt	2^-ΔCt			MAP3K8 si#2	Notch2	GAPDH	ΔCt	2^-ΔCt			MAP3K8 si#2	CTBP2	GAPDH	ΔCt	2^-ΔCt
		34.64	17.57	17.07	7.26805e-06				27.77	17.16	10.61	0.000639841				23.23	17.09	6.14	0.01418
		34.22	17.55	16.67	9.59025e-06				27.7	17.17	10.53	0.000676323				23.25	17.05	6.2	0.0136024
		34.72	17.55	17.17	6.78133e-06				27.9	17.15	10.75	0.000580668				23.23	17.08	6.15	0.014082

## Sheet: Figure 4C
	Figure 4C: TGFβR1, ACTA2, SNAI1, and SNAI2 expression in MAP3K8 siRNA treated SNU719 cells.
	Control (NC)	TGFβR1	GAPDH	ΔCt	2^-ΔCt			Control (NC)	ACTA2	GAPDH	ΔCt	2^-ΔCt			Control (NC)	SNAI1	GAPDH	ΔCt	2^-ΔCt			Control (NC)	SNAI2	GAPDH	ΔCt	2^-ΔCt
		29.74	19.2633	10.4767	0.000701793				33.34	18.78	14.56	4.14003e-05				28.54	18.13	10.41	0.000734984				25.52	18.65	6.87	0.00854917
		30.05	19.2633	10.7867	0.000566096				33.41	18.75	14.66	3.86278e-05				28.52	18	10.52	0.000681027				25.32	18.29	7.03	0.00765172
		30.19	19.2633	10.9267	0.000513743				33.23	18.81	14.42	4.56192e-05				28.82	18.27	10.55	0.000667012				25.29	18.24	7.05	0.00754638
	MAP3K8 si#1	TGFβR1	GAPDH	ΔCt	2^-ΔCt			MAP3K8 si#1	ACTA2	GAPDH	ΔCt	2^-ΔCt				SNAI1	GAPDH	ΔCt	2^-ΔCt				SNAI2	GAPDH	ΔCt	2^-ΔCt
		32.24	19.005	13.235	0.000103721				34.29	19.21	15.08	2.88714e-05			MAP3K8 si#1	29.53	17.91	11.62	0.00031771			MAP3K8 si#1	25.86	18.02	7.84	0.0043644
		31.98	19.005	12.975	0.000124204				34.83	19.13	15.7	1.87858e-05				29.5	18.08	11.42	0.000364953				25.8	18.07	7.73	0.00471019
		31.51	19.005	12.505	0.000172036				34.35	19.15	15.2	2.65671e-05				29.57	17.92	11.65	0.000311172				25.8	18.13	7.67	0.00491021
	MAP3K8 si#2	TGFβR1	GAPDH	ΔCt	2^-ΔCt			MAP3K8 si#2	ACTA2	GAPDH	ΔCt	2^-ΔCt				SNAI1	GAPDH	ΔCt	2^-ΔCt				SNAI2	GAPDH	ΔCt	2^-ΔCt
		30.74	18.8883	11.8517	0.000270578				34.39	18.74	15.65	1.94483e-05			MAP3K8 si#2	29.48	18.13	11.35	0.000383098			MAP3K8 si#2	25.83	17.84	7.99	0.00393342
		31.83	18.8883	12.9417	0.000127107				33.96	18.81	15.15	2.7504e-05				29.19	17.82	11.37	0.000377823				25.82	17.82	8	0.00390625
		31.62	18.8883	12.7317	0.000147023				34.96	18.88	16.08	1.44357e-05				29.11	17.89	11.22	0.000419221				25.75	17.82	7.93	0.00410046
	Figure 4C: TGFβR1, ACTA2, SNAI1, and SNAI2 expression in MAP3K8 siRNA treated YCCEL1 cells.
	Control (NC)	TGFβR1	GAPDH	ΔCt	2^-ΔCt			Control (NC)	ACTA2	GAPDH	ΔCt	2^-ΔCt			Control (NC)	SNAI1	GAPDH	ΔCt	2^-ΔCt			Control (NC)	SNAI2	GAPDH	ΔCt	2^-ΔCt
		26.32	18.0983	8.22167	0.0033499				32.47	18.0983	14.3717	4.71734e-05				28.08	17.17	10.91	0.000519712				36.97	17.84	19.13	1.743e-06
		26.43	18.0983	8.33167	0.00310398				32.16	18.0983	14.0617	5.84812e-05				27.89	17.1	10.79	0.000564789				36.6	17.88	18.72	2.31589e-06
		26.75	18.0983	8.65167	0.0024865				32.08	18.0983	13.9817	6.18157e-05				27.77	17.02	10.75	0.000580668				37.08	17.85	19.23	1.62627e-06
	MAP3K8 si#1	TGFβR1	GAPDH	ΔCt	2^-ΔCt			MAP3K8 si#1	ACTA2	GAPDH	ΔCt	2^-ΔCt			MAP3K8 si#1	SNAI1	GAPDH	ΔCt	2^-ΔCt			MAP3K8 si#1	SNAI2	GAPDH	ΔCt	2^-ΔCt
		29.13	18.0117	11.1183	0.00044983				33.63	18.0117	15.6183	1.98799e-05				28.12	17.02	11.1	0.000455583				38.42	17.9	20.52	6.65066e-07
		28.99	18.0117	10.9783	0.00049567				33.1	18.0117	15.0883	2.87051e-05				28.25	17.14	11.11	0.000452436				38.07	17.85	20.22	8.18792e-07
		28.68	18.0117	10.6683	0.000614486				33.21	18.0117	15.1983	2.65978e-05				28.21	17.2	11.01	0.000484908				38.05	17.88	20.17	8.47666e-07
	MAP3K8 si#2	TGFβR1	GAPDH	ΔCt	2^-ΔCt			MAP3K8 si#2	ACTA2	GAPDH	ΔCt	2^-ΔCt			MAP3K8 si#2	SNAI1	GAPDH	ΔCt	2^-ΔCt			MAP3K8 si#2	SNAI2	GAPDH	ΔCt	2^-ΔCt
		29.03	18.8117	10.2183	0.000839412				33.51	18.8117	14.6983	3.7615e-05				28.53	17.08	11.45	0.000357443				38.1	17.97	20.13	8.71498e-07
		29.33	18.8117	10.5183	0.000681814				33.97	18.8117	15.1583	2.73456e-05				28.32	17.09	11.23	0.000416326				38.01	17.89	20.12	8.77559e-07
		29.24	18.8117	10.4283	0.000725703				33.84	18.8117	15.0283	2.99241e-05				28.61	17.02	11.59	0.000324386				38.1	17.85	20.25	8.01941e-07
