# Supplementary material for: Epigenetic Regulation of MAP3K8 in EBV-Associated Gastric Carcinoma
Source: Int J Mol Sci. 2023 Jan 19;24(3):1964. doi: 10.3390/ijms24031964 (PMC9916342; doi:10.3390/ijms24031964)
Supplement: Supplementary file 1 [file ijms-24-01964-s001.zip › Source data_Figure 5.xlsx]

## Sheet: Figure 5A
	Figure 5A (left): MAP3K8 expression in stomach adenocarcinoma.														Figure 5A (right): MAP3K8 expression in GSE51575.
	1. The mRNA expression profiles in Stomach Adenocarcinoma, Pan Cancer Atlas was downloaded from the following link https://www.cbioportal.org/study/summary?id=stad_tcga_pan_can_atlas_2018 2. mRNA expression of MAP3K8 in normal and cancer patients were curated from the above data set. 3. Bar graph depicting MAP3K8 expression in STAD was constructed using Graph Pad Prism 8.0 analysis software										Normal	Tumor			GSE51575/GPL13607/9275
											220.978	956.511
											223.515	278.959			Sample	Title	Value		Normal	Tumor
											105.736	1160.9			GSM1248612	Patient 1_005N	8.86184		8.86184	9.36815
											137.464	322.889			GSM1248614	Patient 2_006N	8.83123		8.83123	9.91098
											194.396	183.268			GSM1248616	Patient 3_007N	8.05466		8.05466	9.4636
											130.36	309.866			GSM1248618	Patient 4_014N	9.16403		9.16403	5.23054
											148.706	550.803			GSM1248620	Patient 5_024N	8.4262		8.4262	10.6135
											260.596	667.61			GSM1248622	Patient 6_036N	8.5517		8.5517	8.3811
											421.634	489.127			GSM1248624	Patient 7_038N	8.29964		8.29964	9.37714
											224.777	357.435			GSM1248626	Patient 8_040N	8.15397		8.15397	10.143
											423.022	462.402			GSM1248628	Patient 9_044N	9.07175		9.07175	8.63066
											161.741	639.202			GSM1248630	Patient 10_047N	8.51408		8.51408	8.49238
											134.992	209.563			GSM1248632	Patient 11_065N	9.45221		9.45221	8.94819
											137.394	268.581			GSM1248634	Patient 12_076N	8.53207		8.53207	8.65403
											225.184	211.86			GSM1248636	Patient 13_078N	8.37379		8.37379	8.29507
											209.214	182.352			GSM1248638	Patient 14_085N	6.53994		6.53994	12.458
											96.6272	463.829			GSM1248640	Patient 15_086N	7.30086		7.30086	9.05245
											196.882	343.044			GSM1248642	Patient 16_087N	8.3123		8.3123	8.11835
											186.461	151.376			GSM1248644	Patient 17_088N	7.98066		7.98066	7.78847
											146.422	304.202			GSM1248646	Patient 18_098N	8.2596		8.2596	9.24139
											204.087	204.833			GSM1248648	Patient 19_100N	8.31472		8.31472	8.57957
											74.2087	734.291			GSM1248650	Patient 20_101N	8.0244		8.0244	8.14688
											217.567	204.463			GSM1248652	Patient 21_103N	8.30889		8.30889	7.91082
											409.461	367.568			GSM1248654	Patient 22_104N	8.56249		8.56249	9.58069
											872.678	480.73			GSM1248656	Patient 23_116N	8.00029		8.00029	9.67879
											628.99	242.98			GSM1248660	Patient 25_130N	7.82657		7.82657	9.02673
											310.034	299.397			GSM1248662	Patient 26_139N	7.17024		7.17024	8.00419
											267.394	386.205			GSM1248664	Patient 27_151N	8.82126		8.82126	9.56831
											532.031	537.817			GSM1248613	Patient 1_005T	9.36815
											214.261	225.244			GSM1248615	Patient 2_006T	9.91098
											580.532	770.488			GSM1248617	Patient 3_007T	9.4636
											306.912	545.96			GSM1248619	Patient 4_014T	5.23054
											314.523	633.434			GSM1248621	Patient 5_024T	10.6135
											414.804	268.767			GSM1248623	Patient 6_036T	8.3811
											587.122	616.518			GSM1248625	Patient 7_038T	9.37714
												225.59			GSM1248627	Patient 8_040T	10.143
												429.103			GSM1248629	Patient 9_044T	8.63066
												311.49			GSM1248631	Patient 10_047T	8.49238
												307.332			GSM1248633	Patient 11_065T	8.94819
												282.621			GSM1248635	Patient 12_076T	8.65403
												135.287			GSM1248637	Patient 13_078T	8.29507
												337.005			GSM1248639	Patient 14_085T	12.458
												346.446			GSM1248641	Patient 15_086T	9.05245
												348.811			GSM1248643	Patient 16_087T	8.11835
												373.014			GSM1248645	Patient 17_088T	7.78847
												398.175			GSM1248647	Patient 18_098T	9.24139
												166.79			GSM1248649	Patient 19_100T	8.57957
												251.669			GSM1248651	Patient 20_101T	8.14688
												178.853			GSM1248653	Patient 21_103T	7.91082
												627.147			GSM1248655	Patient 22_104T	9.58069
												362.811			GSM1248657	Patient 23_116T	9.67879
												258.76			GSM1248661	Patient 25_130T	9.02673
												385.145			GSM1248663	Patient 26_139T	8.00419
												313.685			GSM1248665	Patient 27_151T	9.56831
												166.95
												183.634
												430.703
												71.6741
												617.632
												152.752
												330.096
												128.471
												485.899
												180.405
												268.686
												261.877
												140.384
												224.473
												208.92
												197.249
												241.523
												648.341
												449.937
												278.758
												677.274
												318.387
												661.222
												262.32
												390.195
												605.134
												454.8
												589.411
												329.973
												292.813
												401.407
												241.863
												182.32
												823.465
												433.576
												201.469
												157.398
												213.147
												410.526
												482.246
												63.1592
												617.664
												551.742
												288.161
												225.796
												426.097
												53.0777
												425.369
												182.773
												1136.9
												202.181
												666.21
												393.4
												806.454
												237.505
												265.285
												235.668
												313.242
												462.135
												422.158
												102.798
												302.815
												377.633
												216.523
												188.66
												339.825
												161.788
												206.083
												518.759
												206.418
												299.906
												247.76
												266.418
												174.004
												517.922
												194.616
												161.76
												212.059
												259.337
												264.585
												341.712
												265.391
												60.8619
												186.188
												106.448
												439.18
												814.114
												383.537
												343.036
												283.162
												276.619
												257.795
												920.172
												434.001
												297.815
												386.435
												314.683
												669.601
												694.768
												177.365
												184.922
												280.197
												173.544
												436.94
												250.633
												101.212
												88.2944
												222.544
												213.106
												181.311
												188.438
												229.017
												164.21
												203.65
												192.376
												280.598
												389.954
												159.77
												225.955
												156.773
												4159.31
												165.734
												160.44
												202.043
												100.229
												301.801
												224.171
												446.963
												537.023
												213.212
												162.23
												102.081
												414.947
												289.236
												290.587
												706.374
												129.771
												732.339
												179.182
												397.826
												237.518
												141.219
												474.697
												199.477
												310.539
												252.555
												361.963
												397.759
												279.121
												670.473
												122.377
												188.724
												452.374
												216.551
												608.731
												894.229
												306.151
												108.15
												266.547
												266.356
												1827.79
												490.639
												356.928
												268.395
												337.359
												248.908
												492.245
												152.618
												369.244
												222.002
												127.496
												257.318
												277.68
												102.468
												484.148
												592.42
												740.32
												215.652
												277.311
												921.898
												538.8
												1061.27
												735.747
												130.354
												89.8728
												788.654
												379.717
												208.047
												118.089
												767.769
												605.045
												253.838
												387.89
												242.972
												110.979
												618.416
												239.604
												582.55
												225.535
												398.431
												195.44
												157.588
												873.413
												843.192
												356.911
												299.548
												167.466
												356.943
												418.268
												213.663
												443.911
												457.609
												104.658
												163.609
												395.107
												141.262
												353.142
												78.7103
												388.063
												323.935
												297.271
												404.363
												267.021
												329.084
												1187.1
												277.339
												462.627
												1426.6
												334.018
												103.911
												525.811
												389.398
												620.101
												281.098
												332.604
												362.216
												173.431
												854.393
												248.81
												486.849
												579.068
												632.945
												450.782
												340.195
												567.055
												649.023
												425.629
												428.385
												455.179
												428.729
												696.707
												330.681
												412.593
												267.471
												548.66
												126.763
												204.979
												461.365
												119.466
												269.026
												140.262
												303.239
												4323.36
												392.405
												158.167
												152.619
												383.74
												263.507
												277.948
												217.418
												441.307
												444.322
												476.144
												608.934
												228.928
												870.761
												242.55
												591.745
												255.048
												411.206
												258.891
												1057.16
												462.297
												650.788
												455.63
												282.526
												98.7256
												278.971
												762.125
												568.447
												106.118
												1346.41
												702.782
												437.482
												1212.32
												516.878
												397.601
												586.481
												120.029
												250.858
												178.695
												303.354
												665.641
												527.832
												258.973
												79.9443
												280.83
												140.289
												263.77
												464.758
												432.881
												389.543
												1326.45
												242.181
												333.209
												214.559
												1583.77
												303.1
												217.212
												958.209
												589.242
												747.788
												1343.54
												205.039
												856.817
												167.425
												405.839
												67.8959
												837.628
												506.768
												1068.95
												569.41
												368.994
												160.883
												412.881
												263.48
												830.588
												409.786
												515.408
												476.623
												350.392
												504.434
												1167.02
												344.887
												201.851
												144.493
												256.919
												501.345
												225.23
												613.059
												257.387
												422.663
												557.438
												443.805
												353.539
												488.309
												557.846
												559.139

## Sheet: Figure 5B
	Figure 5B: Kaplan Meier (KM) plot of MAP3K8 expression vs. disease free progression in GC, generated using KM plotter Web page link: http://kmplot.com/analysis/index.php?p=service&cancer=gastric.

## Sheet: Figure 5C
	Figure 5C: Relationship between MAP3K8 expression and individual cancer stages in STAD_UALCAN web portal assisted analysis
	UALCAN online portal was utilised to determine MAP3K8 expression in STAD TCGA samples based on individual cancer stages. Web page link: http://ualcan.path.uab.edu/cgi-bin/TCGAExResultNew2.pl?genenam=MAP3K8&ctype=STAD

## Sheet: Figure 5D
	Figure 5D: GEPIA-assisted Spearman`s correlation analysis to find pair-wise gene expression correlation in STAD.
	GEPIA online portal was used to perform Spearman`s correlation between gene pairs in STAD. Screenshot of the settings is give for reference. Web page link: http://gepia.cancer-pku.cn/detail.php?clicktag=correlation
