# Supplementary material for: Epigenetic Regulation of MAP3K8 in EBV-Associated Gastric Carcinoma
Source: Int J Mol Sci. 2023 Jan 19;24(3):1964. doi: 10.3390/ijms24031964 (PMC9916342; doi:10.3390/ijms24031964)
Supplement: Supplementary file 1 [file ijms-24-01964-s001.zip › Source data_Supplementary Figure S1.xlsx]

## Sheet: Supplementary Figure S1A
	Supplementary Figure S1A: mRNA expression levels of TGFβR1, SNAI1, and CTBP2 in gastric tumors vs. Normal
	The mRNA expression levels were obtained using the UALCAN online web portal, accessible online at http://ualcan.path.uab.edu/analysis.html

## Sheet: Supplementary Figure S1B
	Supplementary Figure S1B: KM plots of TGFβR1 vs. FP, SNAI1 vs. FP , and CTBP2 vs. FP in gastric carcinoma.
	KM plots were plotted using the online web portal Kaplan-Meier plotter, accessible online at https://kmplot.com/analysis/index.php?p=service&cancer=gastric
	TGFβR1 vs. FP in GC
	SNAI1 vs. FP in GC
	CTBP2 vs. FP in GC
